# Supplementary material for: Decarboxylative 1,2-rearrangement of cyclic carbonates promoted by Lewis acid
Source: Royal Society of Chemistry journal article supplement (doi:10.1039/d2cc03024a), 2022-01-01
Supplement: d2cc03024a1.pdf [file d2cc03024a1.pdf]

## Supporting Information

### Decarboxylative 1,2-Rearrangement of Cyclic Carbonates Promoted by Lewis Acid

Yoichi Dokai, Kodai Saito, and Tohru Yamada

#### Contents

|                                                                     |            |
|---------------------------------------------------------------------|------------|
| <b>1. General Information</b>                                       | <b>S1</b>  |
| <b>2. Supporting Results and Discussion</b>                         |            |
| <b>2.1 Screening of Solvents</b>                                    | <b>S2</b>  |
| <b>2.2 The Comparison of 1,2-Rearrangement</b>                      | <b>S3</b>  |
| <b>2.3 Limitation of Decarboxylative 1,2-Rearrangement</b>          | <b>S5</b>  |
| <b>3. Preparation of Substrates</b>                                 |            |
| <b>3.1 General Procedure for the Synthesis of 1,2-Diols</b>         | <b>S5</b>  |
| <b>3.2 General Procedure for the Synthesis of Cyclic Carbonates</b> | <b>S15</b> |
| <b>4. General Procedure &amp; Characterization Data</b>             |            |
| <b>4.1 Procedure for Conventional Pinacol Rearrangement</b>         | <b>S27</b> |
| <b>4.2 Procedure for Decarboxylative 1,2-Rearrangement</b>          | <b>S34</b> |
| <b>4.3 Procedure for House-Meinwald Rearrangement</b>               | <b>S41</b> |
| <b>5. NMR Spectra</b>                                               | <b>S46</b> |

## 1. General Information

The  $^1\text{H}$  and  $^{13}\text{C}\{^1\text{H}\}$ , and  $^{19}\text{F}$  NMR spectra were recorded with a JEOL model AL-400 or ECS-400 spectrometer using  $\text{CDCl}_3$  as the solvent. All chemical shifts are reported in ppm and coupling constants are in Hz. The  $^1\text{H}$  and  $^{13}\text{C}$  NMR chemical shifts are relative to tetramethylsilane; the resonance of residual protons of chloroform were used as an internal standard for  $^1\text{H}$  ( $\delta 7.26$  ppm) and all-d solvent peaks for  $^{13}\text{C}$  ( $\delta 77.0$  ppm).  $^{19}\text{F}$  NMR chemical shifts are relative to hexafluorobenzene in  $\text{CDCl}_3$  at  $\delta = -163.0$  ppm (external reference). The IR spectra were measured with a Thermo Electron Corporation model NICOLET 6700 FT-IR spectrometer. The melting points were measured with a Stanford Research Systems MPA100. The ESI high resolution mass spectra were obtained using a Waters LCT Premier XE mass spectrometer. The HPLC analysis were performed by Shimadzu SCL-10A chromatograph using Daicel Chiralpak<sup>®</sup> IF; the peak areas were obtained using Shimadzu SPD-M10A VP diode array detector/Shimadzu Class-VP. Column chromatography was conducted on silica gel (CHROMATREX PSQ 100B, Fuji Silysia Chemical, Ltd.).  $\text{ZrCl}_4$  was purchased from Aldrich. The dehydrated dichloromethane (DCM) and dehydrated tetrahydrofuran (THF) were purchased from Kanto Chemical Co., Inc. Bis(trichloromethyl) carbonate was purchased from Tokyo Chemical Industry Co., Ltd., and used without further purification.  $\text{AlCl}_3$  and  $\text{HfCl}_4$  were purchased from FUJIFILM Wako Pure Chemical Co. Pyridine was distilled from KOH.

## 2. Supporting Result and Discussion

### 2.1 Screening of Solvents

Table S1. Screening of Solvents

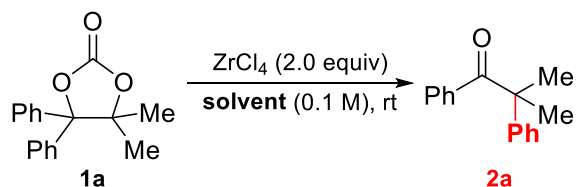

| Entry | solvent                  | Time (h) | Yield of <b>2a</b> (%) <sup>[a]</sup> | RSM (%) <sup>[a,b]</sup> |
|-------|--------------------------|----------|---------------------------------------|--------------------------|
| 1     | $\text{CH}_2\text{Cl}_2$ | 45 min   | 94                                    | 0                        |
| 2     | 1,2-DCE                  | 45 min   | 99                                    | 0                        |
| 3     | chlorobenzene            | 45 min   | 99                                    | 0                        |
| 4     | toluene                  | 6        | 16                                    | 83                       |
| 5     | $\text{Et}_2\text{O}$    | 12       | 0                                     | 98                       |
| 6     | THF                      | 12       | 0                                     | >99                      |
| 7     | $\text{CH}_3\text{CN}$   | 12       | 0                                     | >99                      |

[a] Isolated yield. [b] Recovery of starting material.  
1,2-DCE = 1,2-dichloroethane

The use of halogen solvents such as 1,2-dichloroethane and chlorobenzene gave as the good results as dichloromethane (entries 2 and 3). When the reaction was carried out in toluene, desired product was obtained in only 16% yield (entry 3). No reaction was observed in the case of diethyl ether, tetrahydrofuran, and acetonitrile because these solvents coordinate to Lewis acid (entries 5, 6, and 7). Therefore, we chose dichloromethane as the best solvent.

## 2.2 The Comparison of 1,2-Rearrangement

Table S2. The Comparison of each 1,2-Rearrangement

*Conventional pinacol rearrangement*

*Decarboxylative 1,2-rearrangement*

| Entry | Ar <sup>1</sup>                           | Ar <sup>2</sup> | Substrate<br>(4 or 1) | Yield [%] |    |    |
|-------|-------------------------------------------|-----------------|-----------------------|-----------|----|----|
|       |                                           |                 |                       | 3         | 2  | 2' |
| 1     | <i>p</i> -ClC <sub>6</sub> H <sub>4</sub> |                 | 4n                    | 79        | —  | 0  |
|       |                                           |                 | 1n                    | 0         | —  | 98 |
| 2     | <i>p</i> -BrC <sub>6</sub> H <sub>4</sub> |                 | 4o                    | 94        | —  | 0  |
|       |                                           |                 | 1o                    | 0         | —  | 84 |
| 3     | Ph                                        | PMP             | 4q                    | 95        | 0  | 0  |
|       |                                           |                 | 1q                    | 0         | 48 | 35 |

Scheme S1. The Comparison of 1,2-Rearrangements of 4p and 1p

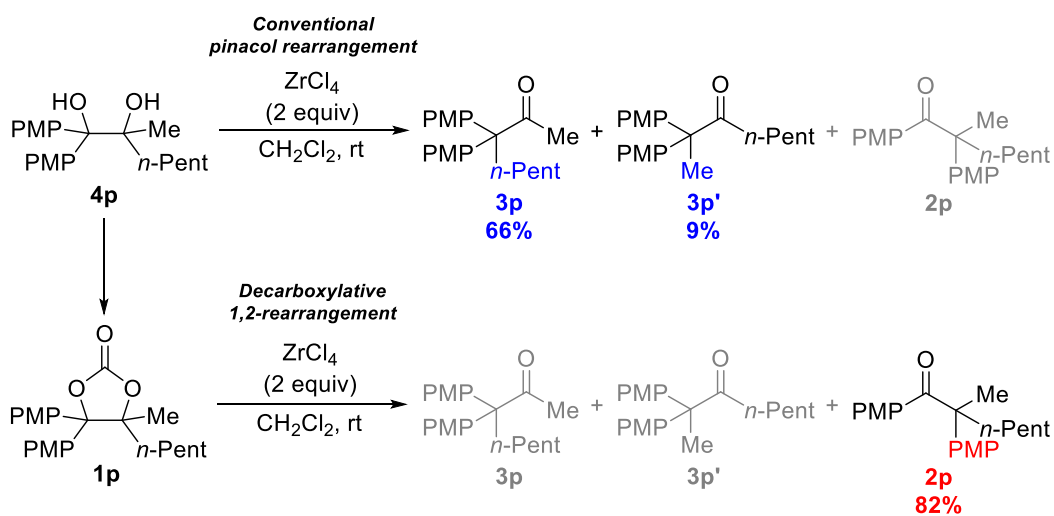

The comparison of each 1,2-rearrangement of 1,2-diols **4** and corresponding cyclic carbonates **1** was investigated (Table S1, S2 and Scheme S1). When 1,2-diols **4** treated with zirconium (IV) chloride in dichloromethane at room temperature, the alkyl or hydride migration depending on the stability of carbocation occurred to afford **3** and/or **3'**. 1,2-rearrangement of diols containing a secondary alcohol moiety (**4i-m**) were resulted in the low selectivity of 1,2-migration. On the other hand, cyclic carbonates **1** were converted into 1,2-aryl migrated products **2** under the same reaction conditions.

## 2.3 Limitation of Decarboxylative 1,2-Rearrangement

### Scheme S2. Limitation of Selectivity on Decarboxylative 1,2-Rearrangement

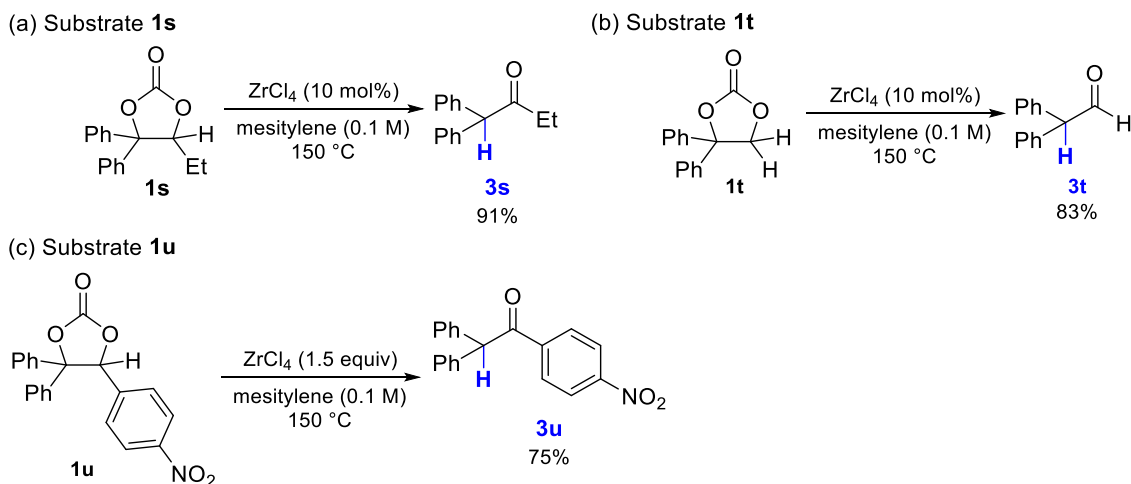

A few cyclic carbonates showed the similar selectivity with the corresponding 1,2-diols. The decarboxylation of substrates **1s**, **1t** and **1u** did not proceed under typical conditions (scheme 3 in manuscript). Although the reaction was carried out using zirconium chloride in mesitylene at 150 °C, only hydride-migrated products (**3s-3u**) were obtained.

## 3. Preparation of Substrates

### 3.1 General Procedure for the Synthesis of 1,2-Diols

#### 3.1.1 Procedure for the Preparation of 1,2-Diols (**4a-4m**, **4r**, **4s**, **4u**)

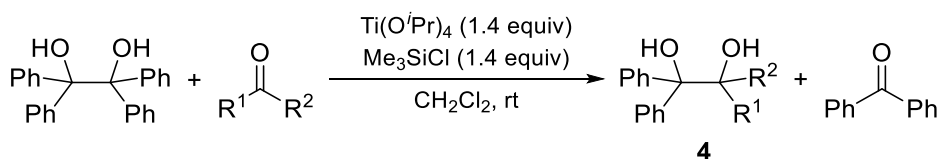

Diols **4a-4m**, **4r**, **4s**, **4u** were prepared according to the literature<sup>1</sup>. Under N<sub>2</sub> atmosphere, benzopinacol (1.83 g, 5.00 mmol) and the corresponding aldehyde or ketone (10.0 mmol) were dissolved into dehydrate CH<sub>2</sub>Cl<sub>2</sub> (25 mL). To the solution, Ti(O<sup>*i*</sup>Pr)<sub>4</sub> (2.0 mL, 6.76 mmol) and Me<sub>3</sub>SiCl (0.9 mL, 7.09 mmol) was added. The resulting solution was stirred at room temperature. The reaction was continuously monitored by thin layer chromatography. When no more benzopinacol was detectable, the reaction was quenched by sat. NH<sub>4</sub>Cl aq. and sat. NaHCO<sub>3</sub> aq., then, filtered through a celite<sup>®</sup> pad. The resulting mixture was extracted three times with CH<sub>2</sub>Cl<sub>2</sub>. The combined organic layer was dried

over Na<sub>2</sub>SO<sub>4</sub>, and the solvent was removed under reduced pressure. The residue was purified by column chromatography to afford the desired 1,2-diols (**4**).

The synthesis and characterization data for 1,2-diols **4a-4c**, **4f-4i**, **4m**, **4u** were previously reported<sup>1</sup>.

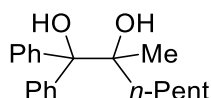

### 2-methyl-1,1-diphenylheptane-1,2-diol (**4d**)

Purified by silica-gel flash column chromatography using *n*-hexane /EtOAc = 30:1 as an eluent; Colorless oil (1.34 g, 90%); <sup>1</sup>H NMR (400 MHz, CDCl<sub>3</sub>): δ = 0.85 (t, *J* = 7.6 Hz, 3H), 1.15-1.37 (m, 8H), 1.43-1.48 (m, 2H), 1.59-1.72 (m, 1H), 2.08 (brs, 1H), 2.83 (brs, 1H), 7.24-7.32 (m, 6H), 7.61-7.64 (m, 4H); <sup>13</sup>C NMR (100 MHz, CDCl<sub>3</sub>): δ = 14.0, 22.7, 23.0, 23.2, 32.5, 37.4, 78.1, 83.1, 126.9, 126.9, 127.59, 127.61, 128.3, 128.4, 144.5, 144.6; IR (neat): 3494, 2954, 2870, 1492, 1447, 1375, 1158, 1035, 754, 705 cm<sup>-1</sup>; HRMS (ESI): [M+H-H<sub>2</sub>O]<sup>+</sup> calcd for C<sub>20</sub>H<sub>25</sub>O<sup>+</sup>, 281.1900; found, *m/z* 281.1898.

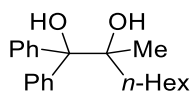

### 2-methyl-1,1-diphenyloctane-1,2-diol (**4e**)<sup>2</sup>

Purified by silica-gel flash column chromatography using *n*-hexane /EtOAc = 30:1 as an eluent; White solid (953.0 mg, 61%); mp 68 °C (lit.<sup>2</sup>, 65-68 °C); <sup>1</sup>H NMR (400 MHz, CDCl<sub>3</sub>): δ = 0.85 (t, *J* = 7.6 Hz, 3H), 1.23-1.72 (m, 13H), 2.03 (brs, 1H), 2.79 (brs, 1H), 7.22-7.32 (m, 6H), 7.61-7.65 (m, 4H); <sup>13</sup>C NMR (100 MHz, CDCl<sub>3</sub>): δ = 14.1, 22.6, 23.0, 23.5, 29.9, 31.9, 37.4, 78.1, 83.1, 126.8, 126.9, 127.5, 127.6, 128.3, 128.4, 144.5, 144.6; IR (KBr): 3557, 3446, 2994, 1445, 1372, 1151, 1037, 753, 705, 640 cm<sup>-1</sup>; HRMS (ESI): [M+H-H<sub>2</sub>O]<sup>+</sup> calcd for C<sub>21</sub>H<sub>27</sub>O<sup>+</sup>, 295.2057; found, *m/z* 295.2056.

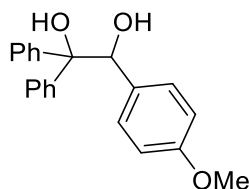

### 2-(4-methoxyphenyl)-1,1-diphenylethane-1,2-diol (**4j**)<sup>3</sup>

Purified by silica-gel flash column chromatography using *n*-hexane /EtOAc = 10:1 as an eluent; White solid (1.36 g, 85%); mp 188-195 °C (lit.<sup>3</sup>, 179-180 °C); <sup>1</sup>H NMR (400 MHz,

CDCl<sub>3</sub>):  $\delta$  = 2.33 (brs, 1H), 3.11 (brs, 1H), 3.74 (s, 3H), 5.60 (s, 1H), 6.68 (d,  $J$  = 9.2 Hz, 2H), 7.00 (d,  $J$  = 9.2 Hz, 2H), 7.06-7.17 (m, 5H), 7.30 (t,  $J$  = 7.2 Hz, 1H), 7.40 (t,  $J$  = 7.2 Hz, 2H), 7.69 (d,  $J$  = 7.2 Hz, 2H); <sup>13</sup>C NMR (100 MHz, CDCl<sub>3</sub>):  $\delta$  = 55.1, 77.6, 80.7, 112.9, 126.2, 126.7, 126.9, 127.3, 127.7, 128.4, 129.2, 130.9, 143.5, 145.1, 159.1.

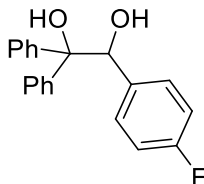

### 2-(4-fluorophenyl)-1,1-diphenylethane-1,2-diol (**4k**)<sup>3</sup>

Purified by silica-gel flash column chromatography using *n*-hexane /EtOAc = 10:1 as an eluent; White solid (1.39 g, 90%); mp 157-162 °C (lit.<sup>3</sup>, 148-150 °C); <sup>1</sup>H NMR (400 MHz, CDCl<sub>3</sub>):  $\delta$  = 2.40 (brs, 1H), 3.09 (brs, 1H), 5.62 (s, 1H), 6.82 (t,  $J$  = 7.6 Hz, 2H), 7.00-7.17 (m, 7H), 7.31 (t,  $J$  = 7.6 Hz, 1H), 7.41 (t,  $J$  = 7.6 Hz, 2H), 7.68 (t,  $J$  = 7.6 Hz, 2H); <sup>13</sup>C NMR (100 MHz, CDCl<sub>3</sub>):  $\delta$  = 77.3, 80.7, 114.2, 114.3 (d,  $J$  = 21.1 Hz), 126.1, 126.9, 126.9, 127.5, 127.7, 128.6, 129.7 (d,  $J$  = 8.6 Hz), 134.5 (d,  $J$  = 2.9 Hz), 143.1, 144.9, 162.3 (d,  $J$  = 244.3 Hz); <sup>19</sup>F NMR (373 MHz, CDCl<sub>3</sub>):  $\delta$  = -116.0.

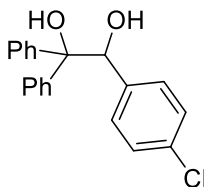

### 2-(4-chlorophenyl)-1,1-diphenylethane-1,2-diol (**4l**)<sup>3</sup>

Purified by silica-gel flash column chromatography using *n*-hexane /EtOAc = 5:1 as an eluent; White solid (1.48 g, 91%); mp 180-182 °C (lit.<sup>3</sup>, 182-183 °C); <sup>1</sup>H NMR (400 MHz, CDCl<sub>3</sub>):  $\delta$  = 2.45 (brs, 1H), 3.08 (brs, 1H), 5.60 (s, 1H), 6.97 (d,  $J$  = 8.4 Hz, 2H), 7.02-7.15 (m, 7H), 7.29-7.33 (m, 1H), 7.39-7.43 (m, 2H), 7.67 (d,  $J$  = 7.6 Hz, 2H); <sup>13</sup>C NMR (100 MHz, CDCl<sub>3</sub>):  $\delta$  = 77.4, 80.7, 126.1, 126.9, 126.9, 127.5 ( $\times$  2C), 127.8, 128.6, 129.4, 133.4, 137.3, 143.0, 144.8.

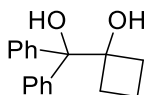

### 1-(hydroxydiphenylmethyl)cyclobutan-1-ol (**4r**)

Purified by silica-gel flash column chromatography using *n*-hexane /EtOAc = 10:1 as an



eluent; White solid (quant.); mp 145-146 °C (lit.<sup>4</sup>, 144.5-145.5 °C); <sup>1</sup>H NMR (400 MHz, CDCl<sub>3</sub>): δ = 1.05 (brs, 1H), 1.74-1.85 (m, 1H), 2.04-2.17 (m, 3H), 2.63-2.70 (m, 2H), 2.85 (brs, 1H), 7.24-7.34 (m, 6H), 7.47-7.50 (m, 4H); <sup>13</sup>C NMR (100 MHz, CDCl<sub>3</sub>): δ = 13.1, 32.9, 80.6, 81.2, 127.2, 127.8, 127.9, 144.1; IR (KBr): 3544, 3434, 2999, 1447, 1371, 1258, 1121, 1048, 753, 709 cm<sup>-1</sup>; HRMS (ESI): [M+H-H<sub>2</sub>O]<sup>+</sup> calcd for C<sub>17</sub>H<sub>17</sub>O<sup>+</sup>, 237.1274; found, m/z 237.1274.

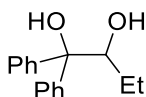

### 1,1-diphenylbutane-1,2-diol (4s)

Purified by silica-gel flash column chromatography using *n*-hexane /EtOAc = 15:1 as an eluent; White solid (860.2 mg, 71%); mp 114 °C; <sup>1</sup>H NMR (400 MHz, CDCl<sub>3</sub>): δ = 0.97 (t, *J* = 7.2 Hz, 3H), 1.32-1.52 (m, 2H), 1.82 (brs, 1H), 2.98 (brs, 1H), 4.48 (dd, *J* = 2.4, 10.0 Hz, 1H), 7.17-7.37 (m, 6H), 7.42-7.44 (m, 2H), 7.59-7.62 (m, 2H); <sup>13</sup>C NMR (100 MHz, CDCl<sub>3</sub>): δ = 11.0, 23.3, 77.3, 80.1, 125.6, 126.1, 126.7, 127.2, 128.2, 128.6, 143.8, 145.8; IR (KBr): 3513, 2968, 1492, 1447, 1170, 1096, 969, 894, 751, 695 cm<sup>-1</sup>; HRMS (ESI): [M+H-H<sub>2</sub>O]<sup>+</sup> calcd for C<sub>16</sub>H<sub>17</sub>O<sup>+</sup>, 225.1274; found, m/z 225.1275.

## 3.1.2 Procedure for the Preparation of 1,2-Diol (4n)

### Preparation of *p*-chlorophenylmagnesium bromide

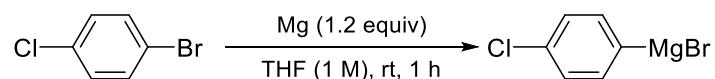

A 100 mL three-neckround bottom flask equipped with a reflux condenser and dropping funnel was charged with magnesium turnings (1.46 g, 60.0 mmol). The system was evacuated, flame dried, cooled, and backfilled with Ar. The magnesium turnings were stirred vigorously at room temperature for 30 min. Then, the turnings were suspended in THF (10 mL) and a small crystal of I<sub>2</sub> was added. The dropping funnel was charged with solution of 1-chloro-4-bromobenzene (50.0 mmol) in THF (40 mL), and the solution was added to the magnesium turnings dropwise over 30 min. The reaction mixture was maintained at room temperature for additional 1 h. The reaction mixture was transferred *via* cannula into a flame dried Schlenk flask.

## Grignard Reaction

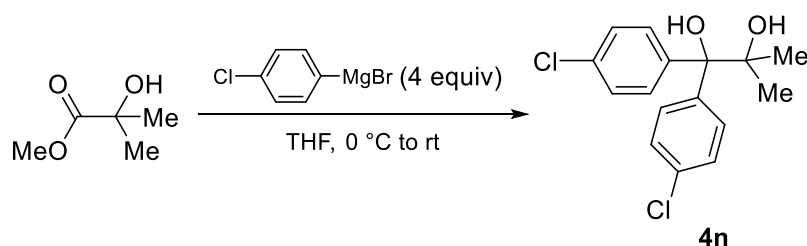

Under N<sub>2</sub> atmosphere, methyl-2-hydroxyisobutyrate (0.57 mL, 5.0 mmol) was dissolved into THF (5.0 mL). After cooling at 0 °C, a solution of *p*-chlorophenylmagnesium bromide (20 mL, 20 mmol, 1 M solution in THF) was added dropwise, and the reaction mixture was warmed to room temperature. The reaction progress was continuously monitored by thin layer chromatography. Upon completion, the reaction was quenched by sat. NH<sub>4</sub>Cl aq., and the mixture was extracted three times with EtOAc. The combined organic layer was washed with brine, dried over Na<sub>2</sub>SO<sub>4</sub>, and the solvent was removed under reduced pressure. The residue was purified by silica gel flash column chromatography as indicated below to afford the 1,2-diol (**4n**).

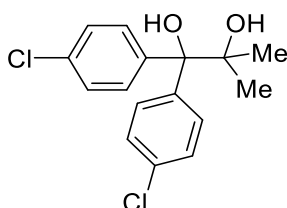

### 1,1-bis(4-chlorophenyl)-2-methylpropane-1,2-diol (**4n**)

Purified by silica-gel flash column chromatography using *n*-hexane /EtOAc = 5:1 as an eluent; Colorless oil (1.27 g, 82%); <sup>1</sup>H NMR (400 MHz, CDCl<sub>3</sub>): δ = 1.31 (s, 6H), 2.04 (brs, 1H), 2.71 (brs, 1H), 7.27 (d, *J* = 8.6 Hz, 4H), 7.57 (d, *J* = 8.6 Hz, 4H); <sup>13</sup>C NMR (100 MHz, CDCl<sub>3</sub>): δ = 26.6, 76.4, 81.8, 127.8, 129.7, 133.2, 142.6; IR (neat): 3473, 2985, 2941, 1490, 1401, 1094, 1014, 901, 814, 574 cm<sup>-1</sup>; HRMS (ESI): [M+H-H<sub>2</sub>O]<sup>+</sup> calcd for C<sub>16</sub>H<sub>15</sub>Cl<sub>2</sub>O<sup>+</sup>, 293.0495; found, *m/z* 293.0496.

### 3.1.3 Procedure for the Preparation of 1,2-Diol (**4o**)

#### Preparation of *p*-bromophenylmagnesium bromide

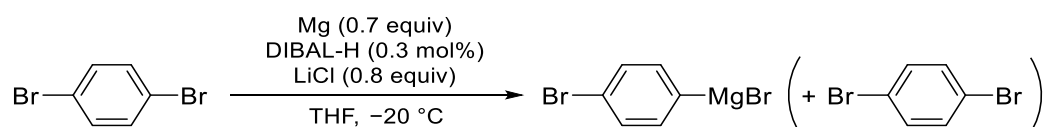

A solution of *p*-bromophenylmagnesium bromide was prepared with reference to the

literature procedure<sup>5</sup>. A dried 30 mL two-neckround bottom flask equipped with a septum was charged with magnesium turnings (486 mg, 20.0 mmol). The system was evacuated, flame dried, cooled, and backfilled with Ar. The magnesium turnings were stirred vigorously at room temperature for 30 min. Then, the turnings were suspended in THF (45 mL) and LiCl<sup>6</sup> (971 mg, 22.9 mmol) was added. After LiCl was completely dissolved, the magnesium was activated with DIBAL-H (0.09 mL, 0.09 mmol, 1 M in toluene). After 5 min of stirring, the solution was cooled to -20 °C and 1,4-dibromobenzene (6.75 g, 28.6 mmol) was added in one portion. The reaction mixture was maintained at -20 °C until the magnesium turnings disappeared. The reaction mixture was used up at once without storage in the next reaction.

### Grignard Reaction

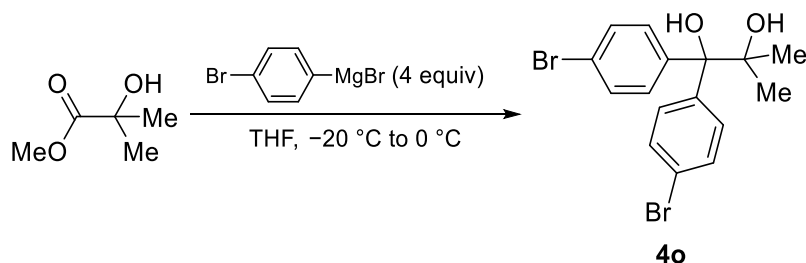

Under N<sub>2</sub> atmosphere, methyl-2-hydroxyisobutyrate (0.57 mL, 5.0 mmol) was dissolved into THF (5.0 mL). After cooling at -20 °C, a solution of the Grignard reagent (45 mL, 20 mmol, 0.44 M solution in THF) was added dropwise, and the reaction mixture was warmed to 0 °C. The reaction progress was continuously monitored by thin layer chromatography. Upon completion, the reaction was quenched by sat. NH<sub>4</sub>Cl aq., and the mixture was extracted three times with EtOAc. The combined organic layer was washed with brine, dried over Na<sub>2</sub>SO<sub>4</sub>, and the solvent was removed under reduced pressure. The residue was purified by silica gel flash column chromatography as indicated below to afford 1,1-bis(4-bromophenyl)-2-methylpropane-1,2-diol **4o**.

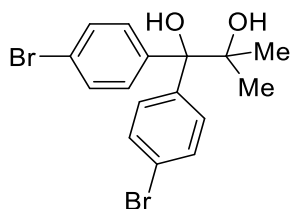

### 1,1-bis(4-bromophenyl)-2-methylpropane-1,2-diol (**4o**)

Purified by silica-gel flash column chromatography using *n*-hexane /EtOAc = 5:1 as an eluent; White solid (780.0 mg, 39%); mp 129-131 °C; <sup>1</sup>H NMR (400 MHz, CDCl<sub>3</sub>): δ = 1.31 (s, 6H), 2.01 (brs, 1H), 2.69 (brs, 1H), 7.42 (d, *J* = 9.0 Hz, 4H), 7.51 (d, *J* = 9.0 Hz,

4H);  $^{13}\text{C}$  NMR (100 MHz,  $\text{CDCl}_3$ ):  $\delta$  = 26.6, 76.3, 81.9, 121.5, 130.0, 130.8, 143.1; IR (KBr): 3486, 2966, 1485, 1397, 1154, 1010, 808, 581  $\text{cm}^{-1}$ ; HRMS (ESI):  $[\text{M}+\text{H}-\text{H}_2\text{O}]^+$  calcd for  $\text{C}_{16}\text{H}_{15}\text{Br}_2\text{O}^+$ , 380.9484; found,  $m/z$  380.9482.

### 3.1.4 Procedure for the Preparation of 1,2-Diol (4p)

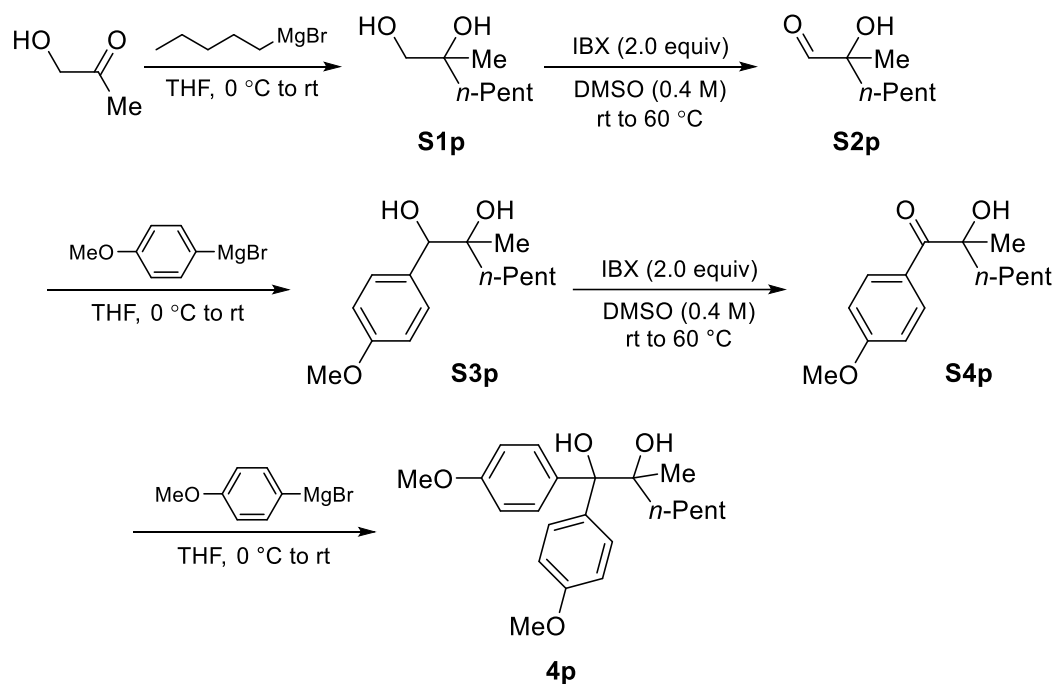

**Step 1:** Under  $\text{N}_2$  atmosphere, hydroxyacetone (1.4 mL, 20 mmol) was dissolved into THF (20 mL). After cooling at  $0\text{ }^\circ\text{C}$ , a solution of pentylmagnesium bromide<sup>7</sup> (50 mL, 50 mmol, 1 M solution in THF) was added dropwise, and the reaction mixture was warmed to room temperature. The reaction progress was continuously monitored by thin layer chromatography. Upon completion, the reaction was quenched by sat.  $\text{NH}_4\text{Cl}$  aq., and the mixture was extracted several times with EtOAc. The combined organic layer was washed with brine, dried over  $\text{Na}_2\text{SO}_4$ , and the solvent was removed under reduced pressure. The residue was purified by silica gel flash column chromatography using  $n\text{-hexane}/\text{EtOAc} = 1:1$  as an eluent to afford **S1p** as a colorless oil (1.61 g, 55%).  $^1\text{H}$  NMR (400 MHz,  $\text{CDCl}_3$ ):  $\delta$  = 0.89 (t,  $J = 7.2$  Hz, 3H), 1.15 (s, 3H), 1.26-1.37 (m, 6H), 1.45-1.49 (m, 2H), 2.72 (brs, 1H), 3.08 (brs, 1H), 3.39 (d,  $J = 11.2$  Hz, 1H), 3.45 (d,  $J = 11.2$  Hz, 1H);  $^{13}\text{C}$  NMR (100 MHz,  $\text{CDCl}_3$ ):  $\delta$  = 14.0, 22.6, 23.0, 23.4, 32.4, 38.6, 69.6, 73.1; IR (neat): 3381, 2934, 1466, 1139, 1044, 609  $\text{cm}^{-1}$ ; HRMS (ESI):  $[\text{M}]^+$  calcd for  $\text{C}_8\text{H}_{18}\text{O}_2^+$ , 147.1380; found,  $m/z$  147.1371.

**Step 2:** IBX<sup>8</sup> (2-iodoxybenzoic acid) solution (0.8 M in DMSO) was prepared by IBX (6.2 g, 22 mmol) dissolved in DMSO (28 mL). The dissolution of IBX in DMSO

completely requires about 5-20 min. To the solution of IBX in DMSO, 1,2-diol **S1p** (1.61 g, 11.0 mmol) was added and the reaction mixture was stirred at room temperature. After 10 min of stirring, the solution was heated to 60 °C. The reaction was monitored by thin layer chromatography until consumption of starting material was observed. The reaction mixture was cooled to room temperature and quenched by water. The mixture was filtered through a celite<sup>®</sup> pad. The filter cake was washed with Et<sub>2</sub>O, and the combined filtrates was extracted three times with Et<sub>2</sub>O. The combined organic layer was washed with sat. NaHCO<sub>3</sub> aq. (3×), brine (3×), dried over Na<sub>2</sub>SO<sub>4</sub>, and the solvent was removed under reduced pressure. The resulting compound **S2p** was pure enough (colorless oil, 1.01 g, 64%), and so used in the next reaction without purification.

**Step 3:** Under N<sub>2</sub> atmosphere, the aldehyde **S2p** (1.0 g, 7.0 mmol) was dissolved into THF (7.0 mL). After cooling at 0 °C, a solution of *p*-methoxyphenylmagnesium bromide (14 mL, 14 mmol, 1 M solution in THF) was added dropwise, and the reaction mixture was warmed to room temperature. The reaction progress was continuously monitored by thin layer chromatography. Upon completion, the reaction was quenched by sat. NH<sub>4</sub>Cl aq., and the mixture was extracted three times with EtOAc. The combined organic layer was washed with brine, dried over Na<sub>2</sub>SO<sub>4</sub>, and the solvent was removed under reduced pressure. The residue was purified by silica gel flash column chromatography using *n*-hexane /EtOAc = 3:1 as an eluent to afford **S3p** as a colorless oil (1.39 g, 79%). <sup>1</sup>H NMR (400 MHz, CDCl<sub>3</sub>; Mixture of diastereoisomers in a 55:45 ratio. The structure of major isomer is not clear.): δ = 0.84-0.91 (m, 3H), 1.00 (s, 1.65H), 1.19-1.47 (m, 9.35H), 1.91 (s, 0.44H), 2.01 (s, 0.56H), 2.44 (brs, 0.45H), 2.54 (brs, 0.55H), 3.81 (s, 3H), 4.49 (s, 1H), 6.86-6.88 (m, 2H), 7.26-7.31 (m, 2H); <sup>13</sup>C NMR (100 MHz, CDCl<sub>3</sub>; Mixture of diastereoisomers.): δ = 14.0, 22.7, 23.0, 23.2, 32.5, 37.4, 78.1, 83.1, 126.9, 126.9, 127.6, 127.6, 128.3, 128.4, 144.5, 144.6; IR (neat): 3494, 2954, 2870, 1492, 1447, 1375, 1158, 1035, 754, 705 cm<sup>-1</sup>; HRMS (ESI): [M+H-H<sub>2</sub>O]<sup>+</sup> calcd for C<sub>20</sub>H<sub>25</sub>O<sup>+</sup>, 281.1900; found, m/z 281.1898.

**Step 4:** The hydroxyketone **S3p** was prepared as a colorless oil from IBX (3.1 g, 11 mmol) and the aldehyde **S4p** (1.4 g, 5.5 mmol) in DMSO (14 mL) according to the same as procedure **Step 2** (1.28 g, 93%, without purification).

**Step 5:** 1,1-bis(4-methoxyphenyl)-2-methylheptane-1,2-diol (**4p**) was prepared as a colorless oil from *p*-methoxyphenylmagnesium bromide (10 mL, 10 mmol, 1 M solution in THF) and the hydroxyketone **S4p** (1.3 g, 5.0 mmol) in THF (5.0 mL) according to the same as procedure **Step 3** (purified by flash column chromatography as indicated below, 1.5 g, 86 %).

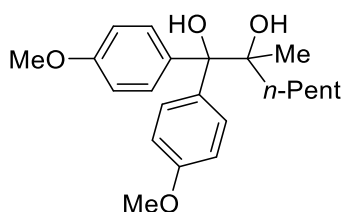

### 1,1-bis(4-methoxyphenyl)-2-methylheptane-1,2-diol (**4p**)

Purified by silica-gel flash column chromatography using *n*-hexane /EtOAc = 5:1 as an eluent; Colorless oil (1.54 g, 86%);  $^1\text{H}$  NMR (400 MHz,  $\text{CDCl}_3$ ):  $\delta$  = 0.86 (t,  $J$  = 7.2 Hz, 3H), 1.20-1.50 (m, 10H), 1.69 (m, 1H), 2.15 (brs, 1H), 2.71 (brs, 1H), 3.80 (s, 6H), 6.82 (d,  $J$  = 8.8 Hz, 4H), 7.52 (m, 4H);  $^{13}\text{C}$  NMR (100 MHz,  $\text{CDCl}_3$ ):  $\delta$  = 14.1, 22.7, 22.9, 23.2, 32.5, 37.4, 55.1, 78.2, 82.7, 112.8 ( $\times$  2C), 129.6, 129.7, 136.9, 137.0, 158.3, 158.3; IR (neat): 3507, 2953, 2836, 1608, 1509, 1248, 1179, 1036, 831, 734, 584  $\text{cm}^{-1}$ ; HRMS (ESI):  $[\text{M}+\text{H}-\text{H}_2\text{O}]^+$  calcd for  $\text{C}_{22}\text{H}_{29}\text{O}_3^+$ , 341.2111; found,  $m/z$  341.2113.

### 3.1.5 Procedure for the Preparation of 1,2-Diol (**4q**)

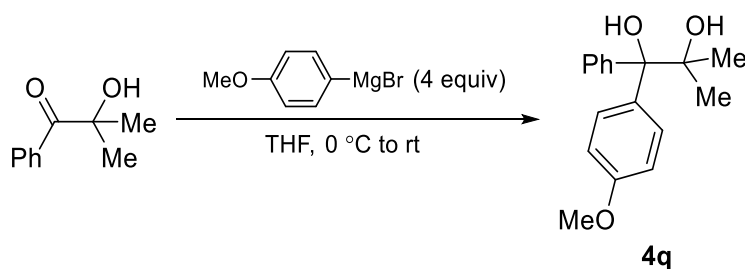

Under  $\text{N}_2$  atmosphere, 2-hydroxy-2-methylpropiophenone (0.76 mL, 5.0 mmol) was dissolved into THF (5.0 mL). After cooling at 0  $^\circ\text{C}$ , a solution of *p*-methoxyphenylmagnesium bromide (20 mL, 20 mmol, 1 M solution in THF) was added dropwise, and the reaction mixture was warmed to room temperature. The reaction progress was continuously monitored by thin layer chromatography. Upon completion, the reaction was quenched by sat.  $\text{NH}_4\text{Cl}$  aq., and the mixture was extracted three times with EtOAc. The combined organic layer was washed with brine, dried over  $\text{Na}_2\text{SO}_4$ , and the solvent was removed under reduced pressure. The residue was purified by silica gel flash column chromatography as indicated below to afford 1-(4-methoxyphenyl)-2-methyl-1-phenylpropane-1,2-diol **4q**.

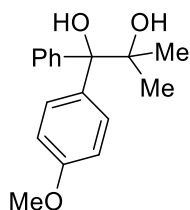

### 1-(4-methoxyphenyl)-2-methyl-1-phenylpropane-1,2-diol (**4q**)

Purified by silica-gel flash column chromatography using *n*-hexane /EtOAc = 4:1 as an eluent; Colorless oil (953.0 mg, 70%);  $^1\text{H}$  NMR (400 MHz,  $\text{CDCl}_3$ ):  $\delta$  = 1.30 (s, 3H), 1.33 (s, 3H), 2.28 (brs, 1H), 2.74 (brs, 1H), 6.82 (d,  $J$  = 9.2 Hz, 2H), 7.24-7.31 (m, 3H), 7.56 (d,  $J$  = 9.2 Hz, 2H), 7.61 (d,  $J$  = 6.8 Hz, 2H);  $^{13}\text{C}$  NMR (100 MHz,  $\text{CDCl}_3$ ):  $\delta$  = 26.4, 26.7, 55.1, 76.5, 82.3, 112.9, 126.9, 127.5, 128.2, 129.6, 136.8, 144.6, 158.4; IR (neat): 3502, 2995, 2836, 1608, 1509, 1251, 1166, 1035, 838, 753, 706  $\text{cm}^{-1}$ ; HRMS (ESI):  $[\text{M}+\text{H}-\text{H}_2\text{O}]^+$  calcd for  $\text{C}_{17}\text{H}_{19}\text{O}_2^+$ , 255.1379; found,  $m/z$  255.1375.

### 3.1.6 Procedure for the Preparation of 1,2-Diol (**4t**)

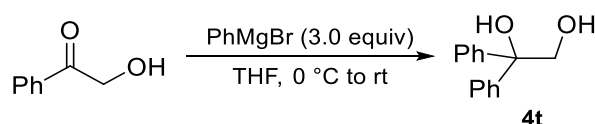

Under  $\text{N}_2$  atmosphere, 2-hydroxyacetophenone (0.62 mL, 5.0 mmol) was dissolved into THF (5.0 mL). After cooling at 0  $^\circ\text{C}$ , a solution of phenylmagnesium bromide (15 mL, 15 mmol, 1 M solution in THF) was added dropwise, and the reaction mixture was warmed to room temperature. The reaction progress was continuously monitored by thin layer chromatography. Upon completion, the reaction was quenched by sat.  $\text{NH}_4\text{Cl}$  aq., and the mixture was extracted several times with EtOAc. The combined organic layer was washed with brine, dried over  $\text{Na}_2\text{SO}_4$ , and the solvent was removed under reduced pressure. The residue was purified by silica gel flash column chromatography as indicated below to afford 1,1-diphenylethane-1,2-diol **4t**.

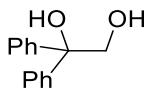

### 1,1-diphenylethane-1,2-diol (**4t**)<sup>9</sup>

Purified by silica-gel flash column chromatography using *n*-hexane /EtOAc = 3:1 as an eluent; White solid (857.0 mg, 80%); mp 117-119  $^\circ\text{C}$  (lit.<sup>9</sup>, 120-121  $^\circ\text{C}$ );  $^1\text{H}$  NMR (400 MHz,  $\text{CDCl}_3$ ):  $\delta$  = 1.88 (brs, 1H), 3.19 (brs, 1H), 4.17 (s, 2H), 7.26-7.45 (m, 10H);  $^{13}\text{C}$  NMR (100 MHz,  $\text{CDCl}_3$ ):  $\delta$  = 69.4, 78.5, 126.37, 127.46, 128.42, 143.73.

### 3.1.7 Procedure for the Preparation of 1,2-Diol (**4v**)

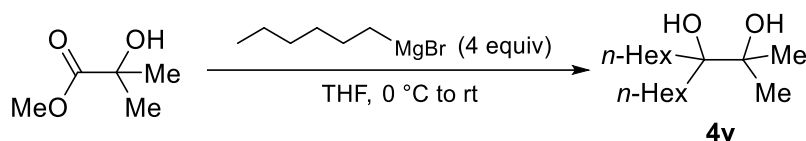

Under N<sub>2</sub> atmosphere, 2-hydroxy-2-methylpropiophenone (0.76 mL, 5.0 mmol) was dissolved into THF (5.0 mL). After cooling at 0 °C, a solution of hexylmagnesium bromide<sup>7</sup> (20 mL, 20 mmol, 1 M solution in THF) was added dropwise, and the reaction mixture was warmed to room temperature. The reaction progress was continuously monitored by thin layer chromatography. Upon completion, the reaction was quenched by sat. NH<sub>4</sub>Cl aq., and the mixture was extracted several times with EtOAc. The combined organic layer was washed with brine, dried over Na<sub>2</sub>SO<sub>4</sub>, and the solvent was removed under reduced pressure. The residue was purified by silica gel flash column chromatography as indicated below to afford 3-hexyl-2-methylnonane-2,3-diol **4v**.

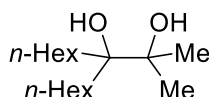

#### 3-hexyl-2-methylnonane-2,3-diol (**4v**)

Purified by silica-gel flash column chromatography using *n*-hexane /EtOAc = 5:1 as an eluent; Colorless oil (294.9 mg, 23%); <sup>1</sup>H NMR (400 MHz, CDCl<sub>3</sub>): δ = 0.89 (t, *J* = 7.2 Hz, 6H), 1.23-1.38 (m, 22H), 1.53-1.55 (m, 4H), 1.91 (s, 1H), 2.07 (s, 1H); <sup>13</sup>C NMR (100 MHz, CDCl<sub>3</sub>): δ = 14.1, 22.7, 24.5, 25.3, 30.3, 31.8, 35.0, 75.7, 77.7; IR (neat): 3445, 2955, 2858, 1466, 1379, 1135, 953 cm<sup>-1</sup>; HRMS (ESI): [M+H-H<sub>2</sub>O]<sup>+</sup> calcd for C<sub>16</sub>H<sub>33</sub>O<sup>+</sup>, 242.2604; found, *m/z* 242.2613.

## 3.2 General Procedure for the Synthesis of Cyclic Carbonate

### 3.2.1 Procedure for the Preparation of Cyclic Carbonates (**1a-1v**)

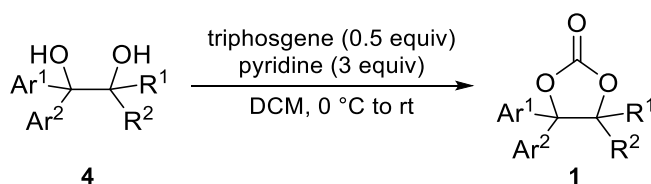

Cyclic carbonate **1a-1v** were prepared according to the literature<sup>10</sup>. Under N<sub>2</sub> atmosphere, the corresponding 1,2-diol (2.00 mmol) and pyridine (6.00 mmol, 3.0 equiv)



were dissolved in dehydrate  $\text{CH}_2\text{Cl}_2$  (5.0 mL), and the solution was cooled to 0 °C. To the solution, triphosgene (1.00 mmol, 0.5 equiv) was added in batches. The reaction mixture was then allowed to stir at room temperature, and the reaction progress was monitored by thin layer chromatography. Upon completion, the reaction was quenched by sat.  $\text{NH}_4\text{Cl}$  aq., and extracted three times with  $\text{CH}_2\text{Cl}_2$ . The combined organic layer was dried over  $\text{Na}_2\text{SO}_4$ , and the solvent was removed under reduced pressure. The residue was purified by column chromatography to obtain the cyclic carbonate (**1a-1v**).

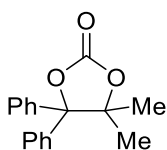

#### 4,4-dimethyl-5,5-diphenyl-1,3-dioxolan-2-one (**1a**)

Purified by silica-gel flash column chromatography using *n*-hexane /EtOAc = 10:1 as an eluent; White solid (quant.); mp 82 °C;  $^1\text{H}$  NMR (400 MHz,  $\text{CDCl}_3$ ):  $\delta$  = 1.42 (s, 6H), 7.35-7.44 (m, 10H);  $^{13}\text{C}$  NMR (100 MHz,  $\text{CDCl}_3$ ):  $\delta$  = 25.6, 89.0, 92.2, 126.4, 128.4, 128.5, 137.8, 153.8; IR (KBr): 2980, 1793, 1493, 1446, 1389, 1267, 1044, 757, 708 $\text{cm}^{-1}$ ; HRMS (ESI):  $[\text{M}+\text{H}]^+$  calcd for  $\text{C}_{17}\text{H}_{17}\text{O}_3^+$ , 269.1172; found,  $m/z$  269.1176.

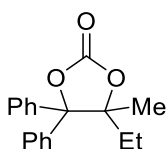

#### 4-ethyl-4-methyl-5,5-diphenyl-1,3-dioxolan-2-one (**1b**)

Purified by silica-gel flash column chromatography using *n*-hexane /EtOAc = 10:1 as an eluent; White solid (519.5 mg, 92%); mp 67-68 °C;  $^1\text{H}$  NMR (400 MHz,  $\text{CDCl}_3$ ):  $\delta$  = 0.97 (t,  $J$  = 7.2 Hz, 3H), 1.36 (s, 3H), 1.66 (q,  $J$  = 7.2 Hz, 2H), 7.33-7.44 (m, 10H);  $^{13}\text{C}$  NMR (100 MHz,  $\text{CDCl}_3$ ):  $\delta$  = 8.1, 22.0, 31.1, 91.1, 92.7, 126.5, 126.6, 128.3 ( $\times$  2C), 128.4, 128.4, 137.5, 138.0, 154.0; IR (KBr): 2987, 1801, 1450, 1255, 1026, 779, 762, 709, 669  $\text{cm}^{-1}$ ; HRMS (ESI):  $[\text{M}+\text{H}]^+$  calcd for  $\text{C}_{18}\text{H}_{19}\text{O}_3^+$ , 283.1329; found,  $m/z$  283.1331.

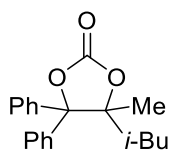

#### 4-isobutyl-4-methyl-5,5-diphenyl-1,3-dioxolan-2-one (1c)

Purified by silica-gel flash column chromatography using *n*-hexane /EtOAc = 20:1 as an eluent; White Solid (478.0 mg, 77%); mp 102 °C; <sup>1</sup>H NMR (400 MHz, CDCl<sub>3</sub>): δ = 0.91 (d, *J* = 6.4 Hz, 6H), 1.38 (m, 4H), 1.58-1.63 (m, 1H), 1.85-1.95 (m, 1H), 7.31-7.45 (m, 10H); <sup>13</sup>C NMR (100 MHz, CDCl<sub>3</sub>): δ = 23.1, 23.3, 24.5, 25.0, 46.0, 91.1, 93.0, 126.5, 126.9, 128.4, 128.4, 128.4, 128.5, 137.6, 137.7, 154.1; IR (KBr): 2992, 2962, 2910, 1797, 1450, 1253, 1224, 1045, 1034, 756, 704 cm<sup>-1</sup>; HRMS (ESI): [M+H]<sup>+</sup> calcd for C<sub>20</sub>H<sub>23</sub>O<sub>3</sub><sup>+</sup>, 311.1642; found, m/z 311.1639.

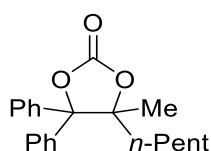

#### 4-methyl-4-pentyl-5,5-diphenyl-1,3-dioxolan-2-one (1d)

Purified by silica-gel flash column chromatography using *n*-hexane /EtOAc = 10:1 as an eluent; White solid (524.8 mg, 81%); mp 93 °C; <sup>1</sup>H NMR (400 MHz, CDCl<sub>3</sub>): δ = 0.81 (t, *J* = 7.2 Hz, 3H), 1.12-1.24 (m, 4H), 1.36-1.67 (m, 7H), 7.32-7.43 (m, 10H); <sup>13</sup>C NMR (100 MHz, CDCl<sub>3</sub>): δ = 13.9, 22.4, 22.8, 23.3, 31.9, 38.1, 91.0, 92.8, 126.56, 126.59, 128.36, 128.38 (× 2C), 128.4, 137.5, 138.0, 154.0; IR (KBr): 2953, 1798, 1452, 1384, 1261, 1135, 1050, 766, 704 cm<sup>-1</sup>; HRMS (ESI): [M+H]<sup>+</sup> calcd for C<sub>21</sub>H<sub>25</sub>O<sub>3</sub><sup>+</sup>, 325.1798; found, m/z 325.1797.

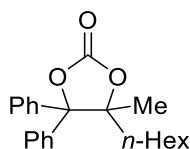

#### 4-hexyl-4-methyl-5,5-diphenyl-1,3-dioxolan-2-one (1e)

Purified by silica-gel flash column chromatography using *n*-hexane /EtOAc = 20:1 as an eluent; Colorless oil (609.2 mg, 90%); <sup>1</sup>H NMR (400 MHz, CDCl<sub>3</sub>): δ = 0.83 (t, *J* = 7.2 Hz, 3H), 1.14-1.22 (m, 6H), 1.36-1.44 (m, 5H), 1.51-1.67 (m, 2H), 7.32-7.43 (m, 10H); <sup>13</sup>C NMR (100 MHz, CDCl<sub>3</sub>): δ = 14.0, 22.4, 22.8, 23.6, 29.4, 31.5, 38.2, 91.0, 92.8, 126.6, 126.6, 128.3, 128.4, 128.4, 128.4, 137.6, 138.0, 154.0; IR (neat): 3062, 2931, 2857,

1804, 1450, 1386, 1251, 1028, 761, 706  $\text{cm}^{-1}$ ; HRMS (ESI):  $[\text{M}+\text{Na}]^+$  calcd for  $\text{C}_{22}\text{H}_{26}\text{O}_3\text{Na}^+$ , 361.1774; found,  $m/z$  361.1779.

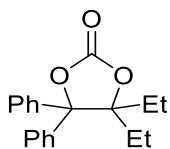

#### 4,4-diethyl-5,5-diphenyl-1,3-dioxolan-2-one (1f)

Purified by silica-gel flash column chromatography using *n*-hexane /EtOAc = 10:1 as an eluent; White solid (515.7 mg, 87%); mp 64-66 °C;  $^1\text{H}$  NMR (400 MHz,  $\text{CDCl}_3$ ):  $\delta$  = 0.86 (t,  $J$  = 7.2 Hz, 6H), 1.67-1.86 (m, 4H), 7.33-7.42 (m, 10H);  $^{13}\text{C}$  NMR (100 MHz,  $\text{CDCl}_3$ ):  $\delta$  = 8.2, 29.2, 92.9, 93.0, 126.6, 128.3 ( $\times$  2C), 138.1, 154.3; IR (KBr): 2983, 2945, 1794, 1450, 1248, 1055, 1033, 780, 757, 709  $\text{cm}^{-1}$ ; HRMS (ESI):  $[\text{M}+\text{H}]^+$  calcd for  $\text{C}_{19}\text{H}_{21}\text{O}_3^+$ , 297.1485; found,  $m/z$  297.1484.

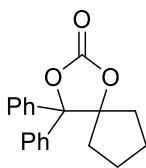

#### 4,4-diphenyl-1,3-dioxaspiro[4.4]nonan-2-one (1g)

Purified by silica-gel flash column chromatography using *n*-hexane /EtOAc = 20:1 as an eluent; White solid (518.1 mg, 88%); mp 77-78 °C;  $^1\text{H}$  NMR (400 MHz,  $\text{CDCl}_3$ ):  $\delta$  = 1.65-1.82 (m, 8H), 7.34-7.43 (m, 10H);  $^{13}\text{C}$  NMR (100 MHz,  $\text{CDCl}_3$ ):  $\delta$  = 23.8, 36.4, 91.1, 100.1, 126.6, 128.5, 128.6, 138.4, 153.8; IR (KBr): 3063, 2958, 2878, 1793, 1494, 1450, 1340, 1246, 1029, 996, 764, 707  $\text{cm}^{-1}$ ; HRMS (ESI):  $[\text{M}]^+$  calcd for  $\text{C}_{19}\text{H}_{18}\text{O}_3^+$ , 294.1251; found,  $m/z$  294.1252.

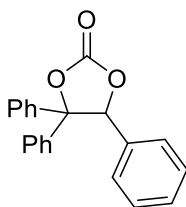

#### 4,4,5-triphenyl-1,3-dioxolan-2-one (1h)

Purified by silica-gel flash column chromatography using *n*-hexane /EtOAc = 10:1 as an eluent; White solid (398.6 mg, 63%); mp 97-98 °C;  $^1\text{H}$  NMR (400 MHz,  $\text{CDCl}_3$ ):  $\delta$  = 6.33 (s, 1H), 6.95-7.21 (m, 10H), 7.34-7.48 (m, 3H), 7.61-7.63 (m, 2H);  $^{13}\text{C}$  NMR (100

MHz, CDCl<sub>3</sub>):  $\delta$  = 86.6, 91.0, 126.3, 126.5, 127.3, 127.8, 128.0, 128.2, 128.9, 129.1, 129.2, 133.6, 137.2, 140.6, 153.9; IR (KBr): 3062, 3033, 1786, 1449, 1208, 1178, 1043, 990, 775, 696 cm<sup>-1</sup>; HRMS (ESI): [M+H]<sup>+</sup> calcd for C<sub>21</sub>H<sub>17</sub>O<sub>3</sub><sup>+</sup>, 317.1172; found, m/z 317.1179.

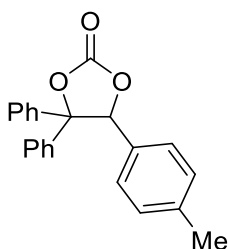

#### 4,4-diphenyl-5-(*p*-tolyl)-1,3-dioxolan-2-one (1i)

Purified by silica-gel flash column chromatography using *n*-hexane /EtOAc = 5:1 as an eluent; White solid (422.9 mg, 64%); mp 126-127 °C; <sup>1</sup>H NMR (400 MHz, CDCl<sub>3</sub>):  $\delta$  = 2.26 (s, 3H), 6.28 (s, 1H), 6.90-6.99 (m, 6H), 7.08-7.15 (m, 3H), 7.38-7.47 (m, 3H), 7.59-7.61 (m, 2H); <sup>13</sup>C NMR (100 MHz, CDCl<sub>3</sub>):  $\delta$  = 21.2, 86.9, 90.9, 126.2, 126.5, 127.5, 127.8, 128.0, 128.9, 128.9, 129.0, 130.4, 137.3, 139.2, 140.8, 154.0; IR (KBr): 3064, 3025, 1784, 1448, 1208, 1181, 1048, 994, 746, 694 cm<sup>-1</sup>; HRMS (ESI): [M+H]<sup>+</sup> calcd for C<sub>22</sub>H<sub>19</sub>O<sub>3</sub><sup>+</sup>, 331.1329; found, m/z 331.1329.

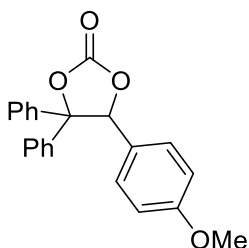

#### 5-(4-methoxyphenyl)-4,4-diphenyl-1,3-dioxolan-2-one (1j)

Purified by silica-gel flash column chromatography using *n*-hexane /EtOAc = 5:1 as an eluent; White solid (360.2 mg, 52%); mp 104 °C; <sup>1</sup>H NMR (400 MHz, CDCl<sub>3</sub>):  $\delta$  = 3.74 (s, 3H), 6.26 (s, 1H), 6.68-6.71 (m, 2H), 6.93-7.00 (m, 4H), 7.09-7.15 (m, 3H), 7.37-7.47 (m, 3H), 7.56-7.60 (m, 2H); <sup>13</sup>C NMR (100 MHz, CDCl<sub>3</sub>):  $\delta$  = 55.2, 86.9, 90.8, 113.6, 125.3, 126.1, 126.5, 127.9, 128.0, 128.7, 128.9, 129.0, 129.1, 137.4, 153.9, 160.2; IR (KBr): 3032, 1783, 1518, 1447, 1260, 1209, 1177, 1042, 697 cm<sup>-1</sup>; HRMS (ESI): [M+H]<sup>+</sup> calcd for C<sub>22</sub>H<sub>19</sub>O<sub>4</sub><sup>+</sup>, 347.1278; found, m/z 347.1286.

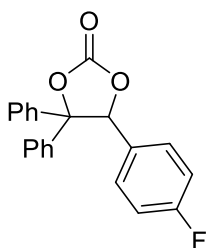

### 5-(4-fluorophenyl)-4,4-diphenyl-1,3-dioxolan-2-one (**1k**)

Purified by silica-gel flash column chromatography using *n*-hexane /EtOAc = 10:1 as an eluent; White solid (635.3 mg, 95%); mp 82 °C; <sup>1</sup>H NMR (400 MHz, CDCl<sub>3</sub>): δ = 6.32 (s, 1H), 6.84-6.89 (m, 2H), 6.94-6.97 (m, 4H), 6.99-7.14 (m, 3H), 7.39-7.48 (m, 3H), 7.57-7.60 (m, 2H); <sup>13</sup>C NMR (100 MHz, CDCl<sub>3</sub>): δ = 85.9, 90.9, 115.4 (d, *J* = 22.1 Hz), 126.2, 126.4, 128.0, 128.2, 129.0, 129.2, 129.3 (d, *J* = 8.6 Hz), 129.5 (d, *J* = 2.9 Hz), 137.1, 140.4, 153.6, 162.9 (d, *J* = 251.0 Hz); <sup>19</sup>F NMR (373 MHz, CDCl<sub>3</sub>): δ = -112.8; IR (KBr): 3068, 3025, 1798, 1513, 1450, 1236, 1209, 1050, 765, 701 cm<sup>-1</sup>; HRMS (ESI): [M+H]<sup>+</sup> calcd for C<sub>21</sub>H<sub>16</sub>FO<sub>3</sub><sup>+</sup>, 335.1078; found, *m/z* 335.1080.

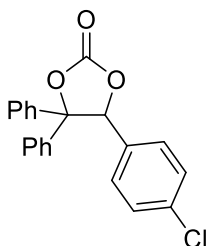

### 5-(4-chlorophenyl)-4,4-diphenyl-1,3-dioxolan-2-one (**1l**)

Purified by silica-gel flash column chromatography using *n*-hexane /EtOAc = 5:1 as an eluent; White solid (609.5 mg, 87%); mp 144 °C; <sup>1</sup>H NMR (400 MHz, CDCl<sub>3</sub>): δ = 6.23 (s, 1H), 6.95-6.98 (m, 4H), 7.12-7.17 (m, 5H), 7.42-7.48 (m, 3H), 7.57-7.60 (m, 2H); <sup>13</sup>C NMR (100 MHz, CDCl<sub>3</sub>): δ = 85.8, 91.0, 126.3, 126.4, 128.0, 128.3, 128.5, 128.7, 129.0, 129.2, 132.1, 135.2, 136.9, 140.3, 153.6; IR (KBr): 3064, 1798, 1494, 1449, 1211, 1181, 1050, 808, 749, 692 cm<sup>-1</sup>; HRMS (ESI): [M+H]<sup>+</sup> calcd for C<sub>21</sub>H<sub>16</sub>ClO<sub>3</sub><sup>+</sup>, 351.0783; found, *m/z* 351.0782.

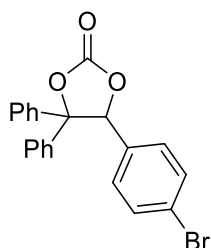

#### 5-(4-bromophenyl)-4,4-diphenyl-1,3-dioxolan-2-one (1m)

Purified by silica-gel flash column chromatography using *n*-hexane /EtOAc = 5:1 as an eluent; White solid (695.6 mg, 88%); mp 144 °C; <sup>1</sup>H NMR (400 MHz, CDCl<sub>3</sub>): δ = 6.28 (s, 1H), 6.89-6.91 (m, 2H), 6.94-6.97 (m, 2H), 7.10-7.16 (m, 3H), 7.30-7.32 (m, 2H), 7.42-7.49 (m, 3H), 7.57-7.59 (m, 2H); <sup>13</sup>C NMR (100 MHz, CDCl<sub>3</sub>): δ = 85.8, 90.9, 123.4, 126.3, 126.4, 128.1, 128.3, 128.9, 129.0, 129.2, 131.5, 132.6, 136.9, 140.2, 153.6; IR (KBr): 3060, 3026, 1798, 1489, 1449, 1210, 1181, 1074, 1010, 805, 748, 702 cm<sup>-1</sup>; HRMS (ESI): [M+H]<sup>+</sup> calcd for C<sub>21</sub>H<sub>16</sub>BrO<sub>3</sub><sup>+</sup>, 395.0278; found, m/z 395.0274.

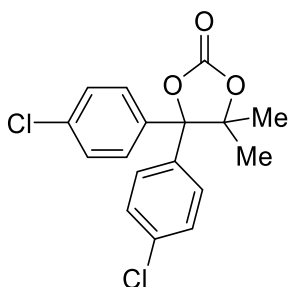

#### 4,4-bis(4-chlorophenyl)-5,5-dimethyl-1,3-dioxolan-2-one (1n)

Purified by silica-gel flash column chromatography using *n*-hexane /EtOAc = 5:1 as an eluent; Colorless oil (640.7 mg, 95%); <sup>1</sup>H NMR (400 MHz, CDCl<sub>3</sub>): δ = 1.41 (s, 6H), 7.33 (d, *J* = 8.4 Hz, 4H), 7.38 (d, *J* = 8.8 Hz, 4H); <sup>13</sup>C NMR (100 MHz, CDCl<sub>3</sub>): δ = 25.5, 88.7, 91.3, 127.8, 128.8, 134.9, 135.9, 153.2; IR (neat): 2985, 1797, 1495, 1405, 1249, 1097, 1037, 820, 776, 536 cm<sup>-1</sup>; HRMS (ESI): [M+H]<sup>+</sup> calcd for C<sub>17</sub>H<sub>15</sub>Cl<sub>2</sub>O<sub>3</sub><sup>+</sup>, 337.0393; found, m/z 337.0384.

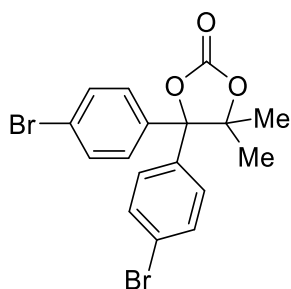

#### 4,4-bis(4-bromophenyl)-5,5-dimethyl-1,3-dioxolan-2-one (**1o**)

Purified by silica-gel flash column chromatography using *n*-hexane /EtOAc = 5:1 as an eluent; White solid (724.4 mg, 85%); mp 146-148 °C; <sup>1</sup>H NMR (400 MHz, CDCl<sub>3</sub>): δ = 1.41 (s, 6H), 7.26 (d, *J* = 8.8 Hz, 4H), 7.54 (d, *J* = 9.2 Hz, 4H); <sup>13</sup>C NMR (100 MHz, CDCl<sub>3</sub>): δ = 25.5, 88.6, 91.4, 123.1, 128.0, 131.8, 136.4, 153.1; IR (KBr): 2979, 1798, 1488, 1400, 1251, 1039, 1007, 826, 774, 533 cm<sup>-1</sup>; HRMS (ESI): [M+H]<sup>+</sup> calcd for C<sub>17</sub>H<sub>15</sub>Br<sub>2</sub>O<sub>3</sub><sup>+</sup>, 429.9383; found, *m/z* 429.9391.

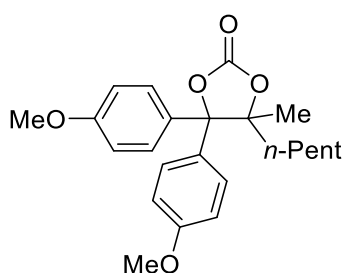

#### 4,4-bis(4-methoxyphenyl)-5-methyl-5-pentyl-1,3-dioxolan-2-one (**1p**)

Purified by silica-gel flash column chromatography using *n*-hexane /EtOAc = 5:1 as an eluent; Colorless oil (515.2 mg, 67%); <sup>1</sup>H NMR (400 MHz, CDCl<sub>3</sub>): δ = 0.82 (t, *J* = 7.6 Hz, 3H), 1.12-1.25 (m, 4H), 1.34 (s, 3H), 1.39-1.42 (m, 2H), 1.54-1.58 (m, 2H), 6.87-6.90 (m, 4H), 7.26-7.31 (m, 4H); <sup>13</sup>C NMR (100 MHz, CDCl<sub>3</sub>): δ = 13.9, 22.4, 22.6, 23.3, 31.9, 37.9, 55.2, 91.1, 92.8, 113.6 (× 2C), 127.8, 127.9, 129.9, 130.4, 154.2, 159.3 (× 2C); IR (neat): 2956, 1800, 1610, 1514, 1256, 1181, 1033, 829, 774, 582 cm<sup>-1</sup>; HRMS (ESI): [M+H]<sup>+</sup> calcd for C<sub>23</sub>H<sub>29</sub>O<sub>5</sub><sup>+</sup>, 385.2010; found, *m/z* 385.2009.

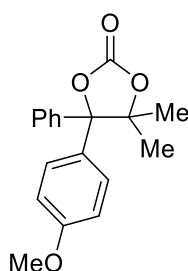

#### 4-(4-methoxyphenyl)-5,5-dimethyl-4-phenyl-1,3-dioxolan-2-one (**1q**)

Purified by silica-gel flash column chromatography using *n*-hexane /EtOAc = 5:1 as an eluent; Colorless oil (533.2 mg, 89%);  $^1\text{H}$  NMR (400 MHz,  $\text{CDCl}_3$ ):  $\delta$  = 1.38 (s, 3H), 1.43 (s, 3H), 3.80 (s, 3H), 7.89 (d,  $J$  = 9.2 Hz, 2H), 7.30-7.40 (m, 7H);  $^{13}\text{C}$  NMR (100 MHz,  $\text{CDCl}_3$ ):  $\delta$  = 25.3, 25.8, 55.3, 89.0, 92.2, 113.7, 126.3, 127.9, 128.4 ( $\times$  2C), 130.0, 137.9, 153.9, 159.4; IR (neat): 2983, 1781, 1611, 1513, 1304, 1176, 1031, 758, 586  $\text{cm}^{-1}$ ; HRMS (ESI):  $[\text{M}+\text{H}]^+$  calcd for  $\text{C}_{18}\text{H}_{19}\text{O}_4^+$ , 299.1278; found,  $m/z$  299.1280.

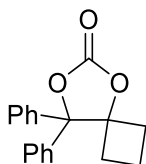

#### 8,8-diphenyl-5,7-dioxaspiro[3.4]octan-6-one (**1r**)

Purified by silica-gel flash column chromatography using *n*-hexane /EtOAc = 10:1 as an eluent; White solid (521.4 mg, 93%); mp 99-100  $^\circ\text{C}$ ;  $^1\text{H}$  NMR (400 MHz,  $\text{CDCl}_3$ ):  $\delta$  = 1.47-1.58 (m, 1H), 1.95-2.06 (m, 1H), 2.30-2.38 (m, 2H), 2.50-2.58 (m, 2H), 7.36-7.41 (m, 10H);  $^{13}\text{C}$  NMR (100 MHz,  $\text{CDCl}_3$ ):  $\delta$  = 13.4, 31.9, 91.3, 92.5, 127.1, 128.6, 129.0, 137.8, 153.2; IR (KBr): 3055, 3003, 2953, 1794, 1448, 1292, 1216, 1116, 1012, 756, 702  $\text{cm}^{-1}$ ; HRMS (ESI):  $[\text{M}]^+$  calcd for  $\text{C}_{18}\text{H}_{16}\text{O}_3^+$ , 280.1094; found,  $m/z$  280.1103.

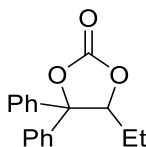

#### 5-ethyl-4,4-diphenyl-1,3-dioxolan-2-one (**1s**)

Purified by silica-gel flash column chromatography using *n*-hexane /EtOAc = 5:1 as an eluent; White solid (413.2 mg, 77%); mp 86-87  $^\circ\text{C}$ ;  $^1\text{H}$  NMR (400 MHz,  $\text{CDCl}_3$ ):  $\delta$  = 1.04 (t,  $J$  = 7.2 Hz, 3H), 1.21-1.33 (m, 1H), 1.39-1.49 (m, 1H), 5.18 (dd,  $J$  = 2.8, 11.2 Hz, 1H), 7.19-7.23 (m, 2H), 7.30-7.44 (m, 8H);  $^{13}\text{C}$  NMR (100 MHz,  $\text{CDCl}_3$ ):  $\delta$  = 10.5, 25.9, 86.2, 89.5, 126.0, 126.2, 128.4, 128.5, 128.8, 129.0, 137.9, 140.4, 153.9; IR (KBr): 2974,



2934, 1791, 1447, 1224, 1032, 1017, 799, 763, 702  $\text{cm}^{-1}$ ; HRMS (ESI):  $[\text{M}+\text{H}]^+$  calcd for  $\text{C}_{17}\text{H}_{17}\text{O}_3^+$ , 269.1172; found,  $m/z$  269.1178.

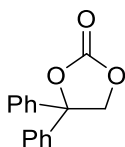

#### 4,4-diphenyl-1,3-dioxolan-2-one (1t)

Purified by silica-gel flash column chromatography using *n*-hexane /EtOAc = 5:1 as an eluent; White solid (395.7 mg, 82%); mp 109-110  $^{\circ}\text{C}$ ;  $^1\text{H}$  NMR (400 MHz,  $\text{CDCl}_3$ ):  $\delta$  = 4.69 (s, 2H), 7.36-7.40 (m, 10H);  $^{13}\text{C}$  NMR (100 MHz,  $\text{CDCl}_3$ ):  $\delta$  = 75.8, 87.2, 125.5, 128.9 ( $\times$  2C), 140.0, 154.0; IR (KBr): 3029, 2933, 1801, 1488, 1374, 1220, 1058, 980, 878, 757, 696  $\text{cm}^{-1}$ ; HRMS (ESI):  $[\text{M}+\text{H}]^+$  calcd for  $\text{C}_{15}\text{H}_{13}\text{O}_3^+$ , 241.0859; found,  $m/z$  241.0856.

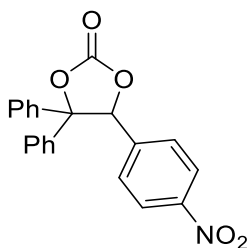

#### 5-(4-nitrophenyl)-4,4-diphenyl-1,3-dioxolan-2-one (1u)

Purified by silica-gel flash column chromatography using *n*-hexane /EtOAc = 5:1 as an eluent; White solid (361.4 mg, 50%); mp 156-157  $^{\circ}\text{C}$ ;  $^1\text{H}$  NMR (400 MHz,  $\text{CDCl}_3$ ):  $\delta$  = 6.44 (s, 1H), 6.93-6.95 (m, 2H), 7.08-7.14 (m, 3H), 7.22-7.26 (m, 2H), 7.46-7.51 (m, 3H), 7.52-7.62 (m, 2H), 8.02-8.04 (m, 2H);  $^{13}\text{C}$  NMR (100 MHz,  $\text{CDCl}_3$ ):  $\delta$  = 84.7, 91.2, 123.3, 126.4, 126.4, 128.0, 128.2, 128.7, 129.2, 129.6, 136.5, 139.6, 140.9, 148.0, 153.2; IR (KBr): 3114, 3086, 1789, 1521, 1350, 1207, 1177, 1048, 761, 699  $\text{cm}^{-1}$ ; HRMS (ESI):  $[\text{M}]^+$  calcd for  $\text{C}_{21}\text{H}_{15}\text{O}_5\text{N}^+$ , 361.0945; found,  $m/z$  361.0951.

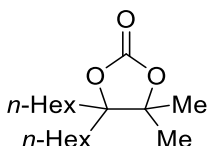

#### 4,4-dihexyl-5,5-dimethyl-1,3-dioxolan-2-one (1v)

Purified by silica-gel flash column chromatography using *n*-hexane /EtOAc = 10:1 as an

eluent; Colorless oil (551.8 mg, 97%);  $^1\text{H}$  NMR (400 MHz,  $\text{CDCl}_3$ ):  $\delta$  = 0.90 (t,  $J$  = 6.8 Hz, 6H), 1.18-1.43 (m, 22H), 1.64-1.80 (m, 4H);  $^{13}\text{C}$  NMR (100 MHz,  $\text{CDCl}_3$ ):  $\delta$  = 14.0, 22.5, 23.0, 23.4, 29.6, 31.5, 31.8, 86.4, 89.7, 154.0; IR (neat): 2930, 2858, 1798, 1466, 1378, 1271, 1109, 1025, 779  $\text{cm}^{-1}$ ; HRMS (ESI):  $[\text{M}+\text{H}]^+$  calcd for  $\text{C}_{17}\text{H}_{33}\text{O}_3^+$ , 285.2424; found,  $m/z$  285.2419.

### 3.2.2 Preparation of Cyclic Carbonate ((*R*)-1b)

#### Synthesis of (*R*)-2-hydroxy-2-methyl-1-phenylbutan-1-one ((*R*)-8b)

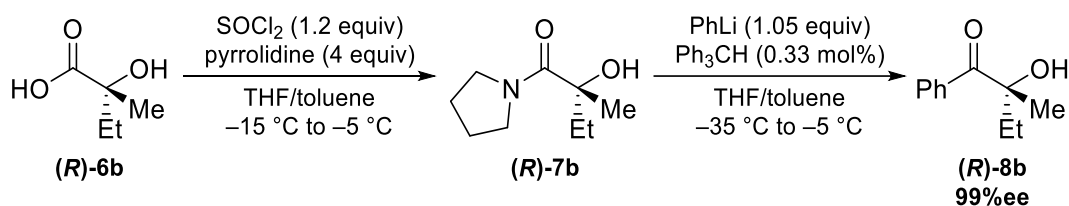

To afford (*R*)-6b, the acid ( $\pm$ )-6b (6.00 g, 50.8 mmol) was neutralized with brucine (20.0 g, 50.8 mmol) in acetone (80 mL)<sup>11</sup>, and the two brucine salts were recrystallized from methanol. Furthermore, the less-soluble salt was recrystallized from methanol five times. The diastereomeric pure salt (4.0 g, 7.8 mmol) was acidified with hydrochloric acid solution (6 M, 40 mL) and extracted nine times with diethyl ether. The ether extracts were washed with saturated sodium chloride solution and dried over sodium sulfite. The solvent was removed *in vacuo* and the white solid (700 mg, 5.93 mmol) was used directly in the following step. Hydroxyketone (*R*)-8b was prepared from 5.00 mmol of (*R*)-6b according to the literature.<sup>12</sup> This afforded 597 mg (67%; 2 steps) of (*R*)-8b as a colorless oil, 99% ee (determined by chiral HPLC: column, Daicel CHIRALPAK<sup>®</sup> IF; eluent, *n*-hexane /2-propanol = 90/10 (v/v); temperature, 20  $^\circ\text{C}$ ; flow rate, 1.0 mL/min; retention time, 6.7 min (minor) and 8.6 min (major)).  $[\alpha]_{\text{D}}^{21} -39.0^\circ$  ( $c$  0.132,  $\text{CCl}_4$ , 99%ee); [lit<sup>13</sup>.  $[\alpha]_{\text{D}}^{27} -34.7^\circ$  ( $c$  0.150,  $\text{CCl}_4$ )].

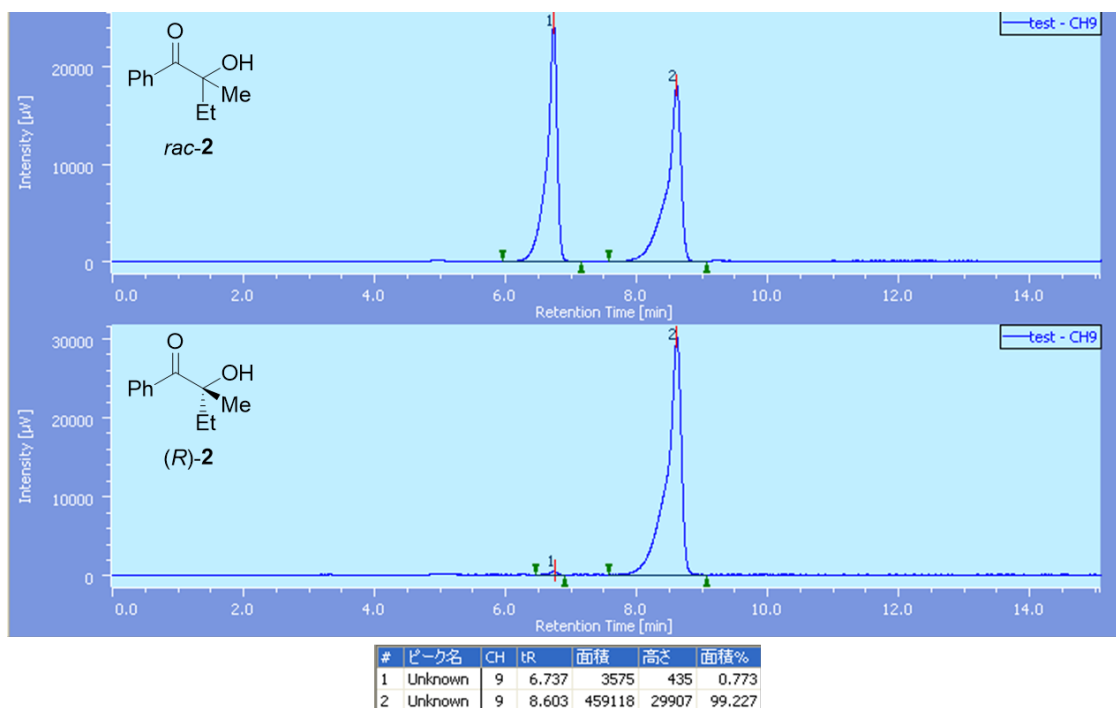

### Preparation of cyclic carbonate ((*R*)-2b)

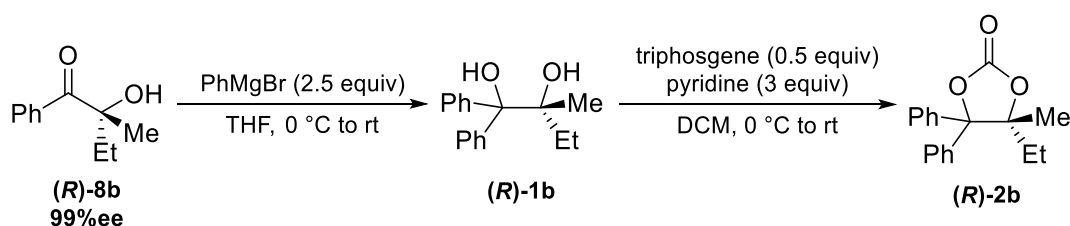

**Step 1:** Under N<sub>2</sub> atmosphere, (*R*)-2-hydroxy-2-methyl-1-phenylbutan-1-one ((*R*)-8b) (446 mg, 2.50 mmol) was dissolved into THF (3.0 mL). After cooling at 0 °C, a solution of pentylmagnesium bromide<sup>7</sup> (6.25 mL, 6.25 mmol, 1 M solution in THF) was added dropwise, and the reaction mixture was warmed to room temperature. The reaction progress was continuously monitored by thin layer chromatography. Upon completion, the reaction was quenched by sat. NH<sub>4</sub>Cl aq., and the mixture was extracted three times with Et<sub>2</sub>O. The combined organic layer was washed with brine, dried over Na<sub>2</sub>SO<sub>4</sub>, and the solvent was removed under reduced pressure. The residue was purified by silica gel flash column chromatography using *n*-hexane /EtOAc = 7:1 as an eluent to afford (*R*)-1b as a colorless oil (600 mg, 94%).

**Step 2:** Cyclic carbonate (*R*)-2b was prepared by **Procedure 3.2.1** using 1.5 mmol of diol (*R*)-1b. This afforded 380 mg (90%) of (*R*)-2b as a white solid.

## 4. General Procedure & Characterization Data

### 4.1 Procedure for Conventional Pinacol Rearrangement

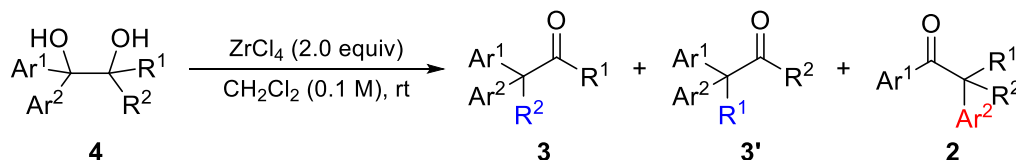

The 1,2-diol **4** (0.1 mmol) was dissolved in dehydrated CH<sub>2</sub>Cl<sub>2</sub> (1.0 mL) and ZrCl<sub>4</sub> (46.6 mg, 0.2 mmol) was added. The reaction mixture was stirred at room temperature under N<sub>2</sub>, and the reaction progress was monitored by thin layer chromatography. Upon completion, the reaction was quenched by sat. NaHCO<sub>3</sub> aq., and extracted three times with CH<sub>2</sub>Cl<sub>2</sub>. The combined organic layer was dried over Na<sub>2</sub>SO<sub>4</sub>, and the solvent was removed under reduced pressure. The residue was purified by preparative thin layer chromatography (*n*-Hexane : EtOAc = 5 : 1) to give ketones (**3** and/or **2**).

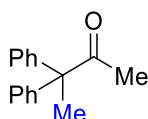

#### 3,3-diphenylbutan-2-one (**3a**)<sup>14</sup>

Colorless oil (lit.<sup>48</sup>, White solid) (22.2 mg, 99%); (lit.<sup>14</sup>, 41°C); <sup>1</sup>H NMR (400 MHz, CDCl<sub>3</sub>): δ = 1.87 (s, 3H), 2.11 (s, 3H), 7.18-7.21 (m, 4H), 7.25-7.35 (m, 6H); <sup>13</sup>C NMR (100 MHz, CDCl<sub>3</sub>): δ = 26.4, 27.6, 62.3, 126.9, 128.3, 128.3, 143.5, 209.2; IR (neat): 3058, 2985, 1708, 1494, 1445, 1352, 1195, 1028, 762, 700, 577 cm<sup>-1</sup>; HRMS (ESI): [M+H]<sup>+</sup> calcd for C<sub>16</sub>H<sub>17</sub>O<sup>+</sup>, 225.1274; found, m/z 225.1277.

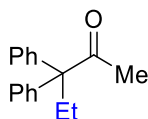

#### 3,3-diphenylpentan-2-one (**3b**)

Colorless oil (quant.); <sup>1</sup>H NMR (400 MHz, CDCl<sub>3</sub>): δ = 0.69 (t, *J* = 7.6 Hz, 3H), 2.03 (s, 3H), 2.35 (q, *J* = 7.6 Hz, 2H), 7.25-7.35 (m, 10H); <sup>13</sup>C NMR (100 MHz, CDCl<sub>3</sub>): δ = 9.4, 27.2, 30.0, 66.7, 126.8, 128.1, 129.4, 141.2, 208.2; IR (neat): 3058, 2974, 2937, 1705, 1599, 1494, 1448, 1352, 1188, 756, 702, 570 cm<sup>-1</sup>; HRMS (ESI): [M]<sup>+</sup> calcd for C<sub>17</sub>H<sub>18</sub>O<sup>+</sup>, 238.1352; found, m/z 238.1360.

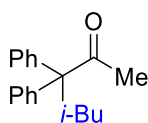

### 5-methyl-3,3-diphenylhexan-2-one (3c)

Colorless oil (14.5 mg, 54%);  $^1\text{H}$  NMR (400 MHz,  $\text{CDCl}_3$ ):  $\delta$  = 0.63 (d,  $J$  = 6.8 Hz, 6H), 1.35 (m, 1H), 2.02 (s, 3H), 2.26 (d,  $J$  = 6.8 Hz, 2H), 7.24-7.33 (m, 10H);  $^{13}\text{C}$  NMR (100 MHz,  $\text{CDCl}_3$ ):  $\delta$  = 24.3, 24.9, 27.2, 45.9, 66.5, 126.8, 128.1, 129.5, 141.8, 208.1; IR (neat): 2955, 2868, 1706, 1494, 1444, 1352, 1187, 1159, 762, 701  $\text{cm}^{-1}$ ; HRMS (ESI):  $[\text{M}+\text{H}]^+$  calcd for  $\text{C}_{19}\text{H}_{23}\text{O}^+$ , 267.1743; found,  $m/z$  267.1740.

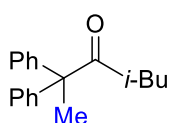

### 5-methyl-2,2-diphenylhexane-3-one (3c')

Colorless oil (9.3 mg, 35%);  $^1\text{H}$  NMR (400 MHz,  $\text{CDCl}_3$ ):  $\delta$  = 0.77 (d,  $J$  = 6.8 Hz, 6H), 1.87 (s, 3H), 2.05 (m, 1H), 2.30 (d,  $J$  = 6.8 Hz, 2H), 7.17-7.20 (m, 4H), 7.25-7.35 (m, 6H);  $^{13}\text{C}$  NMR (100 MHz,  $\text{CDCl}_3$ ):  $\delta$  = 22.4, 24.3, 26.4, 47.9, 62.1, 126.8, 128.2, 128.5, 143.6, 210.4; IR (KBr): 2956, 2870, 1708, 1494, 1444, 1153, 1028, 1011, 761, 728, 700  $\text{cm}^{-1}$ ; HRMS (ESI):  $[\text{M}+\text{H}]^+$  calcd for  $\text{C}_{19}\text{H}_{23}\text{O}^+$ , 267.1743; found,  $m/z$  267.1732.

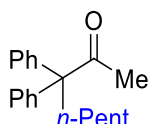

### 3,3-diphenyloctan-2-one (3d)

Colorless oil (23.3 mg, 83%);  $^1\text{H}$  NMR (400 MHz,  $\text{CDCl}_3$ ):  $\delta$  = 0.79 (t,  $J$  = 6.8 Hz, 3H), 0.94-1.02 (m, 2H), 1.19-1.27 (m, 4H), 2.03 (s, 3H), 2.25-2.30 (m, 2H), 7.24-7.35 (m, 10H);  $^{13}\text{C}$  NMR (100 MHz,  $\text{CDCl}_3$ ):  $\delta$  = 14.0, 22.4, 24.5, 27.2, 32.4, 37.3, 66.4, 126.8, 128.1, 129.3, 141.6, 208.3; IR (neat): 2954, 1707, 1495, 1352, 1188, 702  $\text{cm}^{-1}$ ; HRMS (ESI):  $[\text{M}+\text{H}]^+$  calcd for  $\text{C}_{20}\text{H}_{25}\text{O}^+$ , 281.1900; found,  $m/z$  281.1901.

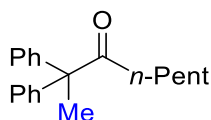

### 2,2-diphenyloctan-3-one (3d')

Colorless oil (3.1 mg, 11%);  $^1\text{H}$  NMR (400 MHz,  $\text{CDCl}_3$ ):  $\delta$  = 0.81 (t,  $J$  = 7.6 Hz, 3H), 1.09-1.21 (m, 4H), 1.46 (quin,  $J$  = 7.6 Hz, 2H), 1.86 (s, 3H), 2.38 (t,  $J$  = 7.6 Hz, 2H),

7.17-7.35 (m, 10H);  $^{13}\text{C}$  NMR (100 MHz,  $\text{CDCl}_3$ ):  $\delta = 13.9, 22.4, 24.2, 26.4, 31.2, 39.5, 62.2, 126.8, 128.3, 128.4, 143.8, 211.5$ ; IR (neat): 2931, 1709, 1494, 1445, 1028, 762,  $700\text{ cm}^{-1}$ ; HRMS (ESI):  $[\text{M}+\text{H}]^+$  calcd for  $\text{C}_{20}\text{H}_{25}\text{O}^+$ , 281.1900; found,  $m/z$  281.1905.

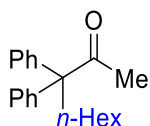

### 3,3-diphenylnonan-2-one (2e)

Colorless oil (26.8 mg, 91%);  $^1\text{H}$  NMR (400 MHz,  $\text{CDCl}_3$ ):  $\delta = 0.82$  (t,  $J = 6.8$  Hz, 3H), 0.94-1.01 (m, 2H), 1.18-1.27 (m, 6H), 2.03 (s, 3H), 2.26-2.30 (m, 2H), 7.25-7.35 (m, 10H);  $^{13}\text{C}$  NMR (100 MHz,  $\text{CDCl}_3$ ):  $\delta = 14.0, 22.6, 24.9, 27.2, 29.9, 31.6, 37.3, 66.4, 126.8, 128.1, 129.3, 141.6, 208.3$ ; IR (neat): 2953, 2930, 2857, 1707, 1599, 1495, 1440, 1351, 1160, 752, 701,  $580\text{ cm}^{-1}$ ; HRMS (ESI):  $[\text{M}+\text{H}]^+$  calcd for  $\text{C}_{21}\text{H}_{27}\text{O}^+$ , 295.2056; found,  $m/z$  295.2057.

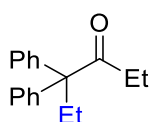

### 4,4-diphenylhexan-3-one (3f)

Colorless oil (quant.);  $^1\text{H}$  NMR (400 MHz,  $\text{CDCl}_3$ ):  $\delta = 0.68$  (t,  $J = 7.6$  Hz, 3H), 0.88 (t,  $J = 7.2$  Hz, 3H), 2.34 (m,  $J = 7.2, 7.6$  Hz, 4H), 7.24-7.35 (m, 10H);  $^{13}\text{C}$  NMR (100 MHz,  $\text{CDCl}_3$ ):  $\delta = 9.1, 9.5, 30.0, 32.5, 66.6, 126.8, 128.1, 129.4, 141.5, 211.5$ ; IR (neat): 3058, 2973, 2937, 2878, 1707, 1494, 1449, 1128, 1033, 756,  $701\text{ cm}^{-1}$ ; HRMS (ESI):  $[\text{M}+\text{H}]^+$  calcd for  $\text{C}_{18}\text{H}_{21}\text{O}^+$ , 253.1587; found,  $m/z$  253.1588.

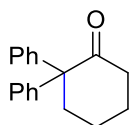

### 2,2-diphenylcyclohexan-1-one (3g)

White solid (23.3 mg, 80%); mp 100-101  $^{\circ}\text{C}$ ;  $^1\text{H}$  NMR (400 MHz,  $\text{CDCl}_3$ ):  $\delta = 1.81$ -1.98 (m, 4H), 2.49-2.62 (m, 4H), 7.05-7.07 (m, 4H), 7.23-7.34 (m, 6H);  $^{13}\text{C}$  NMR (100 MHz,  $\text{CDCl}_3$ ):  $\delta = 22.1, 27.8, 39.1, 40.7, 63.9, 126.8, 128.3, 128.5, 142.3, 211.3$ ; IR (KBr): 3052, 2940, 2866, 1706, 1495, 1445, 1118, 758, 748, 702,  $571\text{ cm}^{-1}$ ; HRMS (ESI):  $[\text{M}+\text{H}]^+$  calcd for  $\text{C}_{18}\text{H}_{19}\text{O}^+$ , 251.1430; found,  $m/z$  251.1428.

### 2,2-diphenyl-1-(*p*-tolyl)ethan-1-one (**3i**)<sup>15</sup>

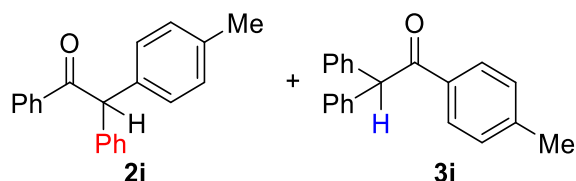

Purified by silica-gel flash column chromatography using *n*-hexane /EtOAc = 5:1 as an eluent; White solid (22.5 mg, 95% combined yield, **2i/3i** = 79:21); <sup>1</sup>H NMR (400 MHz, CDCl<sub>3</sub>, signals for **2i** where distinguishable are marked\*, signals for **3i** where distinguishable are marked\*\*, signal where the two overlap are marked\*\*\*): δ = 2.30\* (s, 3H), 2.35\*\* (s, 3H), 6.00\* (s, 1H), 6.02\*\* (s, 1H), 7.11-7.32\*\*\* (m, 9H), 7.38\* (t, *J* = 7.2 Hz, 2H), 7.48\* (t, *J* = 7.2 Hz, 1H), 7.91\*\* (d, *J* = 8.4 Hz, 2H), 7.99\* (d, *J* = 8.8 Hz, 2H); <sup>13</sup>C NMR (100 MHz, CDCl<sub>3</sub>, signals for **2i** where distinguishable are marked\*, signals for **3i** where distinguishable are marked\*\*): δ = 21.0\*, 21.6\*\*, 59.0\*, 59.2\*\*, 127.0\*\*\*, 128.53\*, 128.6\*\*\*, 128.91\*, 128.9\*, 129.0\*\*, 129.06\*, 129.09\*\*, 129.3\*\*, 129.4\*, 132.9\*, 134.2\*\*, 136.0\*, 136.8\*, 136.8\*, 139.2\*\*, 139.3\*, 143.8\*\*, 197.7\*\*, 198.3\*.

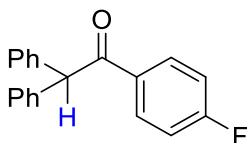

### 1-(4-fluorophenyl)-2,2-diphenylethan-1-one (**3k**)

White solid (10.7 mg, 37%); mp 131-133 °C; <sup>1</sup>H NMR (400 MHz, CDCl<sub>3</sub>): δ = 5.98 (s, 1H), 7.04-7.09 (m, 2H), 7.25-7.34 (m, 10H), 8.00-8.04 (m, 2H); <sup>13</sup>C NMR (100 MHz, CDCl<sub>3</sub>): δ = 59.5, 115.7 (d, *J* = 22.0 Hz), 127.2, 128.8, 129.1, 131.6 (d, *J* = 8.6 Hz), 133.1 (d, *J* = 2.9 Hz), 138.8, 165.6 (d, *J* = 255.8 Hz), 196.6; <sup>19</sup>F NMR (373 MHz, CDCl<sub>3</sub>): δ = -106.3; IR (KBr): 3062, 3027, 1680, 1594, 1503, 1237, 1203, 1157, 821, 745, 697, 597 cm<sup>-1</sup>; HRMS (ESI): [M+H]<sup>+</sup> calcd for C<sub>20</sub>H<sub>16</sub>FO<sup>+</sup>, 291.1180; found, *m/z* 291.1178.

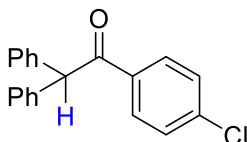

### 1-(4-chlorophenyl)-2,2-diphenylethan-1-one (**3l**)

White solid (14.4 mg, 47%); mp 106-108 °C; <sup>1</sup>H NMR (400 MHz, CDCl<sub>3</sub>): δ = 5.96 (s,

1H), 7.24-7.38 (m, 12H), 7.93 (d,  $J=9.2$  Hz, 2H);  $^{13}\text{C}$  NMR (100 MHz,  $\text{CDCl}_3$ ):  $\delta = 59.5, 127.3, 128.8, 128.9, 129.1, 130.4, 135.0, 138.7, 139.5, 197.0$ ; IR (KBr): 3025, 1678, 1588, 1400, 1208, 1092, 996, 700, 623  $\text{cm}^{-1}$ ; HRMS (ESI):  $[\text{M}+\text{H}]^+$  calcd for  $\text{C}_{20}\text{H}_{16}\text{ClO}^+$ , 307.0884; found,  $m/z$  307.0884.

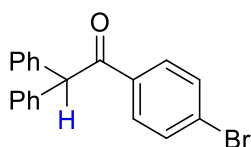

### 1-(4-bromophenyl)-2,2-diphenylethan-1-one (3m)<sup>15</sup>

White solid (14.5 mg, 41%); mp 105-106 °C;  $^1\text{H}$  NMR (400 MHz,  $\text{CDCl}_3$ ):  $\delta = 5.95$  (s, 1H), 7.24-7.35 (m, 10H), 7.54 (d,  $J = 8.8$  Hz, 2H), 7.85 (d,  $J = 8.0$  Hz, 2H);  $^{13}\text{C}$  NMR (100 MHz,  $\text{CDCl}_3$ ):  $\delta = 59.5, 127.3, 128.2, 128.8, 129.1, 130.5, 131.9, 135.4, 138.6, 197.2$ .

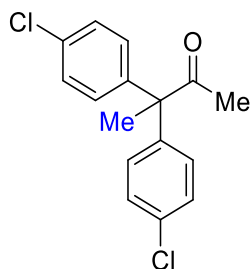

### 3,3-bis(4-chlorophenyl)butan-2-one (3n)

Colorless oil (23.2 mg, 79%);  $^1\text{H}$  NMR (400 MHz,  $\text{CDCl}_3$ ):  $\delta = 1.85$  (s, 3H), 2.11 (s, 3H), 7.09 (d,  $J = 8.8$  Hz, 4H), 7.31 (d,  $J = 8.8$  Hz, 4H);  $^{13}\text{C}$  NMR (100 MHz,  $\text{CDCl}_3$ ):  $\delta = 26.2, 27.3, 61.3, 128.6, 129.6, 133.1, 141.5, 208.1$ ; IR (neat): 2985, 1711, 1490, 1353, 1173, 1096, 1012, 824, 735, 557  $\text{cm}^{-1}$ ; HRMS (ESI):  $[\text{M}+\text{H}]^+$  calcd for  $\text{C}_{16}\text{H}_{15}\text{Cl}_2\text{O}^+$ , 293.0495; found,  $m/z$  293.0490.

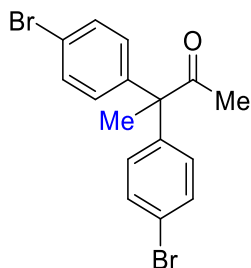

### 3,3-bis(4-bromophenyl)butan-2-one (3o)

White solid (35.9 mg, 94%); mp 84-86 °C;  $^1\text{H}$  NMR (400 MHz,  $\text{CDCl}_3$ ):  $\delta = 1.84$  (s, 3H), 2.11 (s, 3H), 7.03 (d,  $J = 8.8$  Hz, 4H), 7.46 (d,  $J = 8.8$  Hz, 4H);  $^{13}\text{C}$  NMR (100 MHz,



CDCl<sub>3</sub>):  $\delta$  = 26.0, 27.3, 61.5, 121.3, 129.9, 131.6, 142.0, 207.9; IR (KBr): 2968, 1712, 1487, 1353, 1192, 1079, 1007, 821, 554 cm<sup>-1</sup>; HRMS (ESI): [M+H]<sup>+</sup> calcd for C<sub>16</sub>H<sub>15</sub>Br<sub>2</sub>O<sup>+</sup>, 380.9484; found, m/z 380.9487.

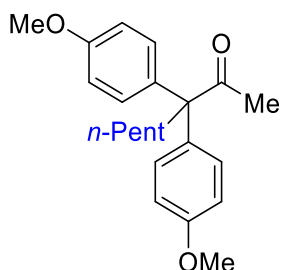

### 3,3-bis(4-methoxyphenyl)octan-2-one (3p)

Colorless oil (22.5 mg, 66%); <sup>1</sup>H NMR (400 MHz, CDCl<sub>3</sub>):  $\delta$  = 0.80 (t, *J* = 7.2 Hz, 3H), 0.94-1.24 (m, 2H), 1.21-1.24 (m, 4H), 2.01 (s, 3H), 2.17-2.23 (m, 2H), 3.81 (s, 6H), 6.86 (d, *J* = 9.2 Hz, 4H), 7.16 (d, *J* = 9.2 Hz, 4H); <sup>13</sup>C NMR (100 MHz, CDCl<sub>3</sub>):  $\delta$  = 14.1, 22.5, 24.6, 27.0, 32.4, 37.5, 55.2, 65.0, 113.5, 130.4, 133.7, 158.2, 208.7; IR (neat): 2954, 1704, 1608, 1509, 1251, 1182, 1036, 827, 569 cm<sup>-1</sup>; HRMS (ESI): [M+H]<sup>+</sup> calcd for C<sub>22</sub>H<sub>29</sub>O<sub>3</sub><sup>+</sup>, 341.2111; found, m/z 341.2115.

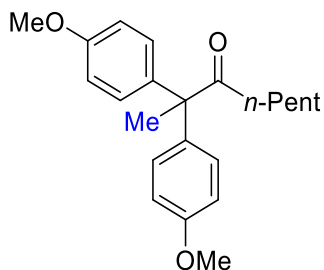

### 2,2-bis(4-methoxyphenyl)octan-3-one (3p')

Colorless oil (3.1 mg, 9%); <sup>1</sup>H NMR (400 MHz, CDCl<sub>3</sub>):  $\delta$  = 0.81 (t, *J* = 7.6 Hz, 3H), 1.09-1.25 (m, 4H), 1.45 (quin, *J* = 7.6 Hz, 2H), 1.81 (s, 3H), 2.36 (t, *J* = 7.6 Hz, 2H), 3.81 (s, 3H), 6.85 (d, *J* = 9.2 Hz, 4H), 7.08 (d, *J* = 9.2 Hz, 4H); <sup>13</sup>C NMR (100 MHz, CDCl<sub>3</sub>):  $\delta$  = 13.9, 22.4, 24.3, 26.5, 31.3, 39.2, 55.3, 60.8, 113.6, 129.4, 136.0, 158.2, 211.9; IR (neat): 2955, 1705, 1607, 1509, 1250, 1180, 1032, 828, 571 cm<sup>-1</sup>; HRMS (ESI): [M+H]<sup>+</sup> calcd for C<sub>22</sub>H<sub>29</sub>O<sub>3</sub><sup>+</sup>, 341.2111; found, m/z 341.2115.

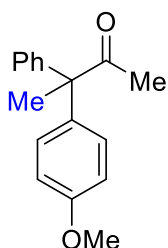

### 3-(4-methoxyphenyl)-3-phenylbutan-2-one (**3q**)

Colorless oil (24.2 mg, 95%);  $^1\text{H NMR}$  (400 MHz,  $\text{CDCl}_3$ ):  $\delta$  = 1.84 (s, 3H), 2.10 (s, 3H), 3.81 (s, 3H), 6.87 (d,  $J$  = 9.2 Hz, 2H), 7.11-7.19 (m, 4H), 7.24-7.35 (m, 3H);  $^{13}\text{C NMR}$  (100 MHz,  $\text{CDCl}_3$ ):  $\delta$  = 26.4, 27.5, 55.2, 61.6, 113.6, 126.8, 128.2, 128.3, 129.4, 135.2, 143.9, 158.3, 209.4; IR (neat): 2983, 1708, 1608, 1510, 1352, 1252, 1184, 1031, 703  $\text{cm}^{-1}$ ; HRMS (ESI):  $[\text{M}+\text{H}]^+$  calcd for  $\text{C}_{17}\text{H}_{19}\text{O}_2^+$ , 255.1380; found,  $m/z$  255.1381.

Similarly, Cyclic carbonate **2q** was treated with 2.0 equivalent of zirconium(IV) chloride in dichloromethane at room temperature to give 1.0 mg (4% yield) of **3q**.

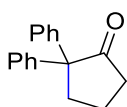

### 2,2-diphenylcyclopentan-1-one (**3r**)<sup>16</sup>

White solid (20.8 mg, 88%); mp 68 °C;  $^1\text{H NMR}$  (400 MHz,  $\text{CDCl}_3$ ):  $\delta$  = 1.94 (quin,  $J$  = 7.6 Hz, 2H), 2.45 (t,  $J$  = 8.0 Hz, 2H), 2.72 (t,  $J$  = 6.4 Hz, 2H), 7.20-7.31 (m, 10H);  $^{13}\text{C NMR}$  (100 MHz,  $\text{CDCl}_3$ ):  $\delta$  = 18.8, 38.1, 38.2, 62.5, 126.7, 128.0, 128.4, 142.1, 217.8.

Similarly, cyclic carbonate **1r** was treated with 2.0 equivalent of zirconium(IV) chloride in dichloromethane at room temperature to give 22.9 mg (97% yield) of **3r**.

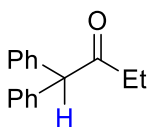

### 1,1-diphenylbutan-2-one (**3u**)

Colorless oil (20.2 mg, 90%);  $^1\text{H NMR}$  (400 MHz,  $\text{CDCl}_3$ ):  $\delta$  = 1.06 (t,  $J$  = 7.6 Hz, 3H), 2.58 (q,  $J$  = 7.6 Hz, 2H), 5.14 (s, 1H), 7.22-7.34 (m, 10H);  $^{13}\text{C NMR}$  (100 MHz,  $\text{CDCl}_3$ ):  $\delta$  = 8.1, 36.1, 63.9, 127.1, 128.6, 128.9, 138.6, 209.2; IR (neat): 3061, 3027, 2977, 2937, 1716, 1599, 1495, 1452, 1348, 1107, 1033, 750, 697, 619  $\text{cm}^{-1}$ ; HRMS (ESI):  $[\text{M}+\text{H}]^+$  calcd for  $\text{C}_{16}\text{H}_{17}\text{O}^+$ , 225.1274; found,  $m/z$  225.1275.

Similarly, cyclic carbonate **1u** was treated with 10 mol% of zirconium(IV) chloride in mesitylene at 150 °C to give 20.4 mg (91% yield) of **3u**.

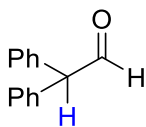

### 2,2-diphenylacetaldehyde (**3t**)<sup>17</sup>

Colorless oil (11.4 mg, 58%); <sup>1</sup>H NMR (400 MHz, CDCl<sub>3</sub>): δ = 4.88 (d, *J* = 2.0 Hz, 1H), 7.20-7.39 (m, 10H), 9.93 (d, *J* = 2.0 Hz, 1H); <sup>13</sup>C NMR (100 MHz, CDCl<sub>3</sub>): δ = 64.0, 127.6, 128.9, 129.1, 136.2, 198.5; HRMS (ESI): [M+H]<sup>+</sup> calcd for C<sub>14</sub>H<sub>13</sub>O<sup>+</sup>, 197.0961; found, *m/z* 197.0965.

Similarly, cyclic carbonate **1t** was treated with 10 mol% of zirconium(IV) chloride in mesitylene at 150 °C to give 16.3 mg (83% yield) of **3t**.

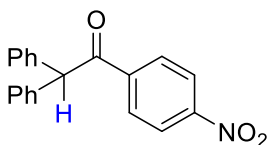

### 1-(4-nitrophenyl)-2,2-diphenylethan-1-one (**3u**)

Paleyellow solid (25.1 mg, 79%); mp 130-131 °C; <sup>1</sup>H NMR (400 MHz, CDCl<sub>3</sub>): δ = 5.99 (s, 1H), 7.24-7.36 (m, 10H), 8.10-8.12 (m, 2H), 8.21-8.23 (m, 2H); <sup>13</sup>C NMR (100 MHz, CDCl<sub>3</sub>): δ = 60.2, 123.8, 127.5, 128.9, 129.0, 129.9, 137.9, 141.2, 150.0, 196.7; IR (KBr): 3073, 3024, 1687, 1601, 1520, 1346, 1202, 835, 747, 703 cm<sup>-1</sup>; HRMS (ESI): [M+H]<sup>+</sup> calcd for C<sub>20</sub>H<sub>16</sub>O<sub>3</sub>N<sup>+</sup>, 318.1125; found, *m/z* 318.1118.

Similarly, cyclic carbonate **1u** was treated with 1.0 equivalent of zirconium(IV) chloride in mesitylene at 150 °C to give 23.8 mg (75% yield) of **3u**.

## 4.2 Procedure for Decarboxylative 1,2-Rearrangement

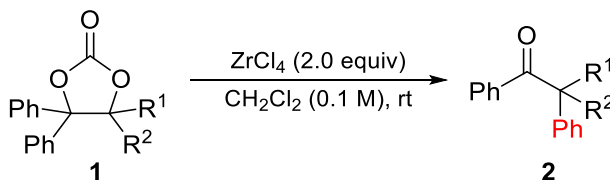

The cyclic carbonate **1** (0.1 mmol) was dissolved in dehydrated CH<sub>2</sub>Cl<sub>2</sub> (1.0 mL) and ZrCl<sub>4</sub> (46.6 mg, 0.2 mmol) was added. The reaction mixture was stirred at room temperature under N<sub>2</sub>, and the reaction progress was monitored by thin layer chromatography. Upon completion, the reaction was quenched by sat. NaHCO<sub>3</sub> aq., and extracted three times with CH<sub>2</sub>Cl<sub>2</sub>. The combined organic layer was dried over Na<sub>2</sub>SO<sub>4</sub>,

and the solvent was removed under reduced pressure. The residue was purified by preparative thin layer chromatography (*n*-Hexane : EtOAc = 5 : 1) to give ketone **2**.

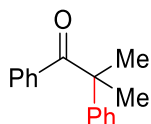

### 2-methyl-1,2-diphenylpropan-1-one (**2a**)<sup>18</sup>

White solid (21.1 mg, 94%); mp 38 °C (lit.<sup>18</sup>, 41°C); <sup>1</sup>H NMR (400 MHz, CDCl<sub>3</sub>): δ = 1.60 (s, 6H), 7.19-7.37 (m, 8H), 7.47-7.50 (m, 2H); <sup>13</sup>C NMR (100 MHz, CDCl<sub>3</sub>): δ = 27.8, 51.4, 125.7, 126.7, 127.9, 129.0, 129.7, 131.6, 136.2, 145.2, 203.7.

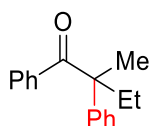

### 2-methyl-1,2-diphenylbutan-1-one (**2b**)

Colorless oil (19.1 mg, 80%); <sup>1</sup>H NMR (400 MHz, CDCl<sub>3</sub>): δ = 0.75 (t, *J* = 7.6 Hz, 3H), 1.55 (s, 3H), 2.02-2.20 (m, 2H), 7.18-7.37 (m, 8H), 7.43-7.45 (m, 2H); <sup>13</sup>C NMR (100 MHz, CDCl<sub>3</sub>): δ = 8.6, 23.7, 32.0, 54.9, 126.2, 126.7, 127.9, 128.8, 129.4, 131.5, 136.9, 144.3, 203.8; IR (neat): 3059, 2971, 2937, 1677, 1597, 1446, 1234, 963, 762, 701 cm<sup>-1</sup>; HRMS (ESI): [M]<sup>+</sup> calcd for C<sub>17</sub>H<sub>18</sub>O<sup>+</sup>, 238.1352; found, *m/z* 238.1345.

HPLC conditions: Daicel CHIRALPAK<sup>®</sup> IF column, *n*-hexane /2-propanol = 85/15 (v/v), 20 °C, flow rate = 1.0 mL/min, *t<sub>R</sub>* = 4.16 min (major enantiomer), 4.44 (minor enantiomer). [*a*]<sub>D</sub><sup>22</sup> -59.3° (*c* 0.150, C<sub>6</sub>H<sub>6</sub>, 99%ee), [cf. (**S**)-**2b**; lit<sup>19</sup>. [*a*]<sub>D</sub><sup>20</sup> +37° (*c* 1.0, C<sub>6</sub>H<sub>6</sub>)]

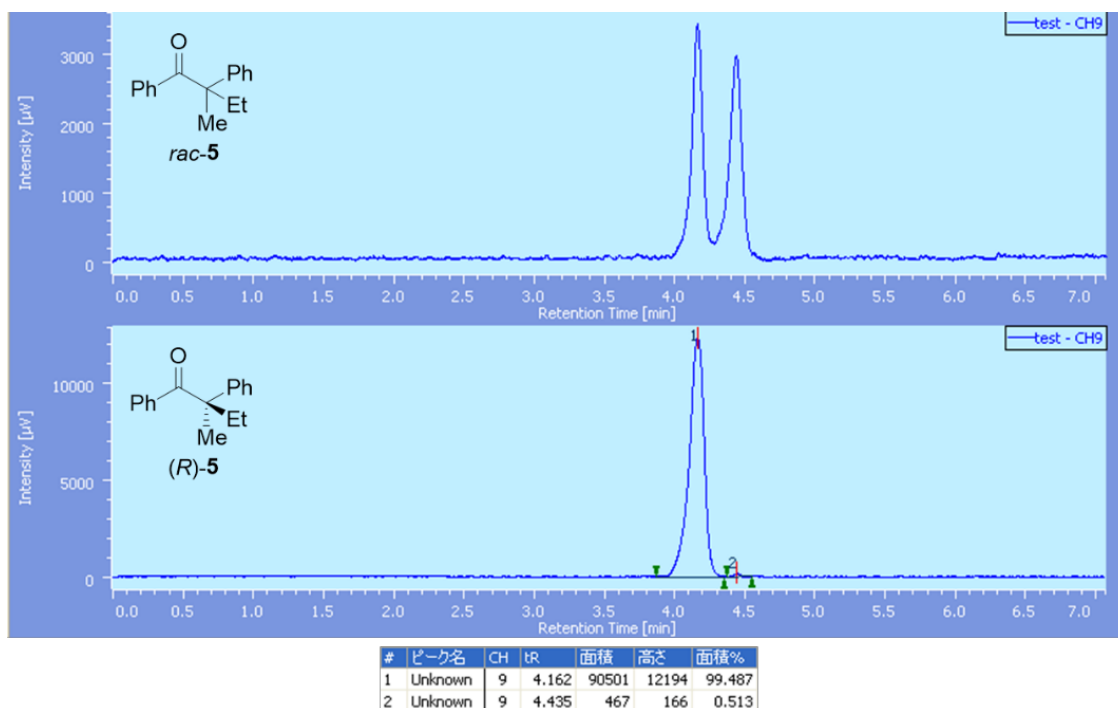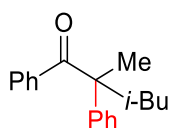

### 2,4-dimethyl-1,2-diphenylpentan-1-one (2c)

Colorless oil (26.1 mg, 98%);  $^1\text{H}$  NMR (400 MHz,  $\text{CDCl}_3$ ):  $\delta$  = 0.73 (dd,  $J$  = 4.8, 6.8 Hz, 6H), 1.56 (m, 1H), 1.61 (s, 3H), 1.98-2.12 (m, 2H), 7.18-7.36 (m, 8H), 7.41-7.43 (m, 2H);  $^{13}\text{C}$  NMR (100 MHz,  $\text{CDCl}_3$ ):  $\delta$  = 24.5, 24.7, 25.0, 48.0, 54.9, 126.3, 126.7, 127.9, 128.8, 129.4, 131.4, 137.1, 144.5, 204.1; IR (neat): 3059, 2955, 2868, 1676, 1597, 1445, 1238, 964, 761, 701  $\text{cm}^{-1}$ ; HRMS (ESI):  $[\text{M}+\text{Na}]^+$  calcd for  $\text{C}_{19}\text{H}_{22}\text{ONa}^+$ , 289.1563; found,  $m/z$  289.1563.

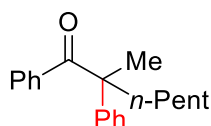

### 2-methyl-1,2-diphenylheptan-1-one (2d)

Colorless oil (26.6 mg, 95%);  $^1\text{H}$  NMR (400 MHz,  $\text{CDCl}_3$ ):  $\delta$  = 0.78 (t,  $J$  = 7.2 Hz, 3H), 1.00-1.20 (m, 6H), 1.56 (s, 3H), 1.96-2.15 (m, 2H), 7.18-7.36 (m, 8H), 7.42-7.44 (m, 2H);  $^{13}\text{C}$  NMR (100 MHz,  $\text{CDCl}_3$ ):  $\delta$  = 13.9, 22.3, 23.7, 24.5, 32.3, 39.1, 54.7, 126.2, 126.7, 127.9, 128.9, 129.4, 131.5, 136.9, 144.6, 203.8; IR (neat): 2932, 1677, 1597, 1446, 1376, 1240, 970, 701  $\text{cm}^{-1}$ ; HRMS (ESI):  $[\text{M}+\text{H}]^+$  calcd for  $\text{C}_{20}\text{H}_{25}\text{O}^+$ , 281.1900; found,  $m/z$

281.1902.

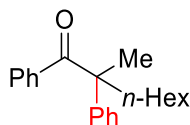

### 2-methyl-1,2-diphenyloctan-1-one (**2e**)

Colorless oil (29.1 mg, 99%);  $^1\text{H}$  NMR (400 MHz,  $\text{CDCl}_3$ ):  $\delta$  = 0.80 (t,  $J$  = 6.4 Hz, 3H), 1.17 (m, 8H), 1.56 (s, 3H), 1.96-2.15 (m, 2H), 7.16-7.35 (m, 8H), 7.43-7.45 (m, 2H);  $^{13}\text{C}$  NMR (100 MHz,  $\text{CDCl}_3$ ):  $\delta$  = 14.0, 22.5, 24.0, 24.5, 29.8, 31.4, 39.3, 54.6, 126.1, 126.7, 127.8, 128.8, 129.3, 131.4, 136.9, 144.6, 203.7; IR (neat): 3059, 2929, 2858, 1677, 1597, 1445, 1242, 964, 762, 701  $\text{cm}^{-1}$ ; HRMS (ESI):  $[\text{M}+\text{H}]^+$  calcd for  $\text{C}_{21}\text{H}_{27}\text{O}^+$ , 295.2056; found,  $m/z$  295.2054.

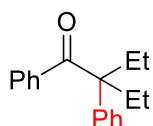

### 2-ethyl-1,2-diphenylbutan-1-one (**2f**)<sup>18</sup>

Colorless oil (22.7 mg, 90%);  $^1\text{H}$  NMR (400 MHz,  $\text{CDCl}_3$ ):  $\delta$  = 0.66 (t,  $J$  = 7.6 Hz, 6H), 2.08-2.18 (m, 4H), 7.17-7.21 (m, 2H), 7.26-7.41 (m, 8H);  $^{13}\text{C}$  NMR (100 MHz,  $\text{CDCl}_3$ ):  $\delta$  = 7.8, 26.3, 58.5, 126.8, 127.0, 127.9, 128.7, 129.3, 131.4, 137.4, 143.0, 204.1.

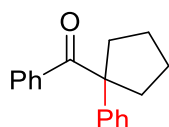

### phenyl(1-phenylcyclopentyl)methanone (**2g**)

Colorless oil (21.0 mg, 84%);  $^1\text{H}$  NMR (400 MHz,  $\text{CDCl}_3$ ):  $\delta$  = 1.66-1.78 (m, 4H), 2.06-2.11 (m, 2H), 2.49-2.54 (m, 2H), 7.19-7.38 (m, 8H), 7.61-7.63 (m, 2H);  $^{13}\text{C}$  NMR (100 MHz,  $\text{CDCl}_3$ ):  $\delta$  = 24.6, 37.4, 63.3, 126.0, 126.5, 127.9, 128.9, 129.8, 131.7, 136.1, 144.5, 202.1; IR (neat): 3058, 2957, 2871, 1675, 1597, 1494, 1446, 1236, 1178, 1010, 757, 700  $\text{cm}^{-1}$ ; HRMS (ESI):  $[\text{M}+\text{H}]^+$  calcd for  $\text{C}_{18}\text{H}_{19}\text{O}^+$ , 251.1430; found,  $m/z$  251.1424.

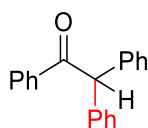

### 1,2,2-triphenylethan-1-one (**2h**)<sup>15</sup>

White solid (23.1 mg, 85%); mp 134-135  $^{\circ}\text{C}$  (lit.<sup>20</sup>, 131-132  $^{\circ}\text{C}$ );  $^1\text{H}$  NMR (400 MHz,

CDCl<sub>3</sub>):  $\delta$  = 6.04 (s, 1H), 7.23-7.50 (m, 13H), 7.99-8.01 (m, 2H); <sup>13</sup>C NMR (100 MHz, CDCl<sub>3</sub>):  $\delta$  = 59.4, 127.1, 128.6, 128.7, 128.9, 129.1, 133.0, 136.8, 139.0, 198.2.

Similarly, 1,2-diol **4h** was treated with 2.0 equivalent of zirconium(IV) chloride in dichloromethane at room temperature to give 27.0 mg (99% yield) of **2h**.

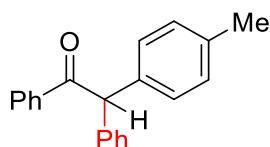

### 1,2-diphenyl-2-(*p*-tolyl)ethan-1-one (**2i**)

White solid (27.2 mg, 95%); mp 95-96 °C; <sup>1</sup>H NMR (400 MHz, CDCl<sub>3</sub>):  $\delta$  = 2.29 (s, 3H), 6.00 (s, 1H), 7.11-7.50 (m, 12H), 7.98-8.00 (m, 2H); <sup>13</sup>C NMR (100 MHz, CDCl<sub>3</sub>):  $\delta$  = 21.0, 59.0, 127.0, 128.5, 128.6, 128.9, 128.9, 129.1, 129.4, 132.9, 136.0, 136.8, 136.8, 139.3, 198.3; IR (KBr): 3058, 3027, 2916, 1681, 1447, 1204, 791, 755, 698, 684, 604 cm<sup>-1</sup>; HRMS (ESI): [M+H]<sup>+</sup> calcd for C<sub>21</sub>H<sub>19</sub>O<sup>+</sup>, 287.1430; found, m/z 287.1430.

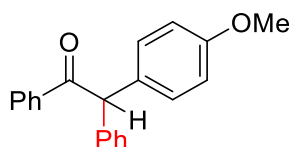

### 2-(4-methoxyphenyl)-1,2-diphenylethan-1-one (**2j**)<sup>21</sup>

Colorless oil (25.1 mg, 83%); <sup>1</sup>H NMR (400 MHz, CDCl<sub>3</sub>):  $\delta$  = 3.76 (s, 3H), 5.99 (s, 1H), 6.84-6.87 (m, 2H), 7.18-7.52 (m, 10H), 7.98-8.01 (m, 2H); <sup>13</sup>C NMR (100 MHz, CDCl<sub>3</sub>):  $\delta$  = 55.2, 58.5, 114.1, 127.0, 128.6, 128.6, 128.9, 129.0, 130.1, 131.1, 132.9, 136.8, 139.4, 158.6, 198.4.

Similarly, 1,2-diol **4j** was treated with 2.0 equivalent of zirconium(IV) chloride in dichloromethane at room temperature to give 29.9 mg (99% yield) of **2j**.

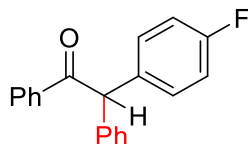

### 2-(4-fluorophenyl)-1,2-diphenylethan-1-one (**2k**)

White solid (25.3 mg, 87%); mp 106-107 °C; <sup>1</sup>H NMR (400 MHz, CDCl<sub>3</sub>):  $\delta$  = 6.02 (s, 1H), 6.98-7.00 (m, 2H), 7.02-7.53 (m, 10H), 7.98-8.00 (m, 2H); <sup>13</sup>C NMR (100 MHz, CDCl<sub>3</sub>):  $\delta$  = 58.5, 115.5 (d, *J* = 21.1 Hz), 127.3, 128.6, 128.9, 128.9, 128.9, 130.7 (d, *J* =

7.7 Hz), 133.3, 134.8 (d,  $J = 2.8$  Hz), 136.5, 138.9, 161.9 (d,  $J = 247.2$  Hz), 198.0;  $^{19}\text{F}$  NMR (373 MHz,  $\text{CDCl}_3$ ):  $\delta = -116.9$ ; IR (KBr): 3057, 3029, 1682, 1597, 1507, 1448, 1218, 759, 740, 694  $\text{cm}^{-1}$ ; HRMS (ESI):  $[\text{M}+\text{Na}]^+$  calcd for  $\text{C}_{20}\text{H}_{15}\text{FNaO}^+$ , 313.0999; found,  $m/z$  313.1000.

Similarly, 1,2-diol **4k** was treated with 2.0 equivalent of zirconium(IV) chloride in dichloromethane at room temperature to give 18.3 mg (63% yield) of **2k**.

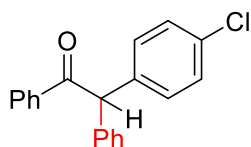

### 2-(4-chlorophenyl)-1,2-diphenylethane-1-one (**2l**)

Colorless oil (29.1 mg, 95%);  $^1\text{H}$  NMR (400 MHz,  $\text{CDCl}_3$ ):  $\delta = 6.00$  (s, 1H), 7.19 (d,  $J = 8.4$  Hz, 2H), 7.24-7.32 (m, 7H), 7.39-7.42 (m, 2H), 7.50-7.51 (m, 1H), 7.98 (d,  $J = 7.2$  Hz, 2H);  $^{13}\text{C}$  NMR (100 MHz,  $\text{CDCl}_3$ ):  $\delta = 58.6, 127.4, 128.7, 128.8, 128.9, 128.9, 128.9, 130.5, 133.1, 133.2, 136.5, 137.6, 138.6, 197.8$ ; IR (neat): 3062, 1685, 1596, 1490, 1208, 1091, 1015, 798, 697  $\text{cm}^{-1}$ ; HRMS (ESI):  $[\text{M}+\text{H}]^+$  calcd for  $\text{C}_{20}\text{H}_{16}\text{ClO}^+$ , 307.0884; found,  $m/z$  307.0889.

Similarly, 1,2-diol **4l** was treated with 2.0 equivalent of zirconium(IV) chloride in dichloromethane at room temperature to give 14.4 mg (47% yield) of **2l**.

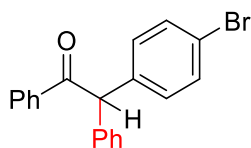

### 2-(4-bromophenyl)-1,2-diphenylethane-1-one (**2m**)

Colorless oil (33.7 mg, 96%);  $^1\text{H}$  NMR (400 MHz,  $\text{CDCl}_3$ ):  $\delta = 5.99$  (s, 1H), 7.14 (d,  $J = 8.8$  Hz, 2H), 7.24-7.53 (m, 10H), 7.98 (d,  $J = 7.6$  Hz, 2H);  $^{13}\text{C}$  NMR (100 MHz,  $\text{CDCl}_3$ ):  $\delta = 58.7, 121.3, 127.4, 128.7, 128.91, 128.93, 128.94, 130.9, 131.7, 133.2, 136.5, 138.2, 138.5, 197.7$ ; IR (neat): 3061, 3027, 1685, 1596, 1487, 1447, 1292, 1208, 1073, 1010, 795, 749, 697, 636  $\text{cm}^{-1}$ ; HRMS (ESI):  $[\text{M}+\text{H}]^+$  calcd for  $\text{C}_{20}\text{H}_{16}\text{BrO}^+$ , 351.0379; found,  $m/z$  351.0374.

Similarly, 1,2-diol **4m** was treated with 2.0 equivalent of zirconium(IV) chloride in dichloromethane at room temperature to give 17.2 mg (49% yield) of **2m**.



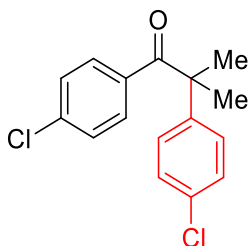

### 1,2-bis(4-chlorophenyl)-2-methylpropan-1-one (2n)

Colorless oil (28.7 mg, 98%);  $^1\text{H NMR}$  (400 MHz,  $\text{CDCl}_3$ ):  $\delta$  = 1.58 (s, 6H), 7.21-7.23 (m, 4H), 7.33 (d,  $J$  = 8.8 Hz, 2H), 7.44 (d,  $J$  = 8.8 Hz, 2H);  $^{13}\text{C NMR}$  (100 MHz,  $\text{CDCl}_3$ ):  $\delta$  = 27.7, 51.0, 127.0, 128.4, 129.3, 131.2, 132.8, 133.9, 138.3, 143.6, 201.8; IR (neat): 2978, 1680, 1586, 1488, 1251, 1092, 976, 840, 757, 572  $\text{cm}^{-1}$ ; HRMS (ESI):  $[\text{M}+\text{H}]^+$  calcd for  $\text{C}_{16}\text{H}_{15}\text{Cl}_2\text{O}^+$ , 293.0495; found,  $m/z$  293.0487.

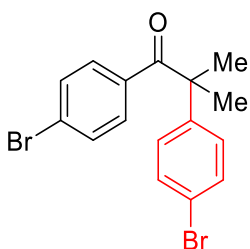

### 1,2-bis(4-bromophenyl)-2-methylpropan-1-one (2o)

White solid (32.1 mg, 84%); mp 105-107  $^\circ\text{C}$ ;  $^1\text{H NMR}$  (400 MHz,  $\text{CDCl}_3$ ):  $\delta$  = 1.57 (s, 6H), 7.16 (d,  $J$  = 8.8 Hz, 2H), 7.35-7.40 (m, 4H), 7.47 (d,  $J$  = 8.8 Hz, 2H);  $^{13}\text{C NMR}$  (100 MHz,  $\text{CDCl}_3$ ):  $\delta$  = 27.7, 51.1, 120.9, 127.0, 127.4, 131.3, 131.3, 132.2, 134.3, 144.1, 201.9; IR (KBr): 2973, 1673, 1583, 1488, 1248, 978, 825, 752, 568  $\text{cm}^{-1}$ ; HRMS (ESI):  $[\text{M}+\text{H}]^+$  calcd for  $\text{C}_{16}\text{H}_{15}\text{Br}_2\text{O}^+$ , 380.9475; found,  $m/z$  380.9475.

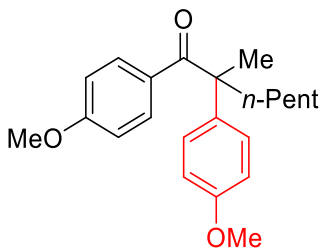

### 1,2-bis(4-methoxyphenyl)-2-methylheptan-1-one (2p)

Colorless oil (27.9 mg, 82%);  $^1\text{H NMR}$  (400 MHz,  $\text{CDCl}_3$ ):  $\delta$  = 0.79 (t,  $J$  = 7.2 Hz, 3H), 0.99-1.27 (m, 6H), 1.52 (s, 3H), 1.91-2.11 (m, 2H), 3.76 (s, 3H), 3.79 (s, 3H), 6.70 (d,  $J$  = 9.2 Hz, 2H), 6.87 (d,  $J$  = 9.2 Hz, 2H), 7.18 (d,  $J$  = 8.4 Hz, 2H), 7.51 (d,  $J$  = 9.2 Hz, 2H);

$^{13}\text{C}$  NMR (100 MHz,  $\text{CDCl}_3$ ):  $\delta = 13.9, 22.4, 23.8, 25.0, 32.4, 39.6, 53.7, 55.1, 55.2, 113.0, 114.1, 127.1, 129.3, 131.9, 137.3, 158.1, 162.0, 202.3$ ; IR (neat): 2933, 1667, 1600, 1509, 1251, 1032, 832, 588  $\text{cm}^{-1}$ ; HRMS (ESI):  $[\text{M}+\text{H}]^+$  calcd for  $\text{C}_{22}\text{H}_{29}\text{O}_3^+$ , 341.2111; found,  $m/z$  341.2109.

## 2-(4-methoxyphenyl)-2-methyl-1-phenylpropan-1-one (**2p**)<sup>22</sup>

### 1-(4-methoxyphenyl)-2-methyl-2-phenylpropan-1-one (**2p'**)

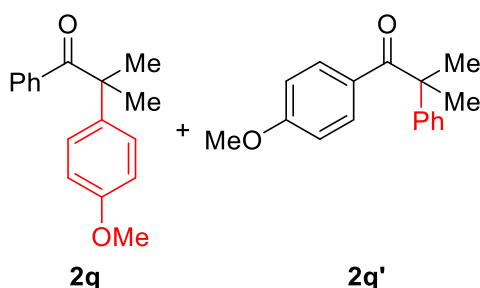

Purified by silica-gel flash column chromatography using *n*-hexane /EtOAc = 5:1 as an eluent; Colorless oil (21.1 mg, 83% combined yield, **2q/2q'** = 58:42);  $^1\text{H}$  NMR (400 MHz,  $\text{CDCl}_3$ , signals for **2q** where distinguishable are marked\*, signals for **2q'** where distinguishable are marked\*\*, signal where the two overlap are marked\*\*\*):  $\delta = 1.58^*$  (s, 6H),  $1.60^{**}$  (s, 6H),  $3.76^{**}$  (s, 3H),  $3.80^*$  (s, 3H),  $6.70^{**}$  (d,  $J = 9.2$  Hz, 2H),  $6.89^*$  (d,  $J = 9.2$  Hz, 2H),  $7.23\text{-}7.36^{***}$  (m, 5H),  $7.48^*$  (d,  $J = 9.2$  Hz, 2H),  $7.54^{**}$  (d,  $J = 9.2$  Hz, 2H);  $^{13}\text{C}$  NMR (100 MHz,  $\text{CDCl}_3$ , signals for **2q** where distinguishable are marked\*, signals for **2q'** where distinguishable are marked\*\*):  $\delta = 27.9^{**}, 28.1^*, 50.7^*, 51.2^{**}, 55.2^{**}, 55.3^*, 113.1^{**}, 114.3^*, 125.6^{**}, 126.6^{**}, 126.8^*, 127.9^*, 128.4^{**}, 128.9^{**}, 129.6^*, 131.5^*, 132.3^{**}, 136.4^*, 137.2^*, 146.0^{**}, 158.3^*, 162.2^{**}, 202.0^{**}, 204.0^*$ .

## 4.3 Procedure for House-Meinwald Rearrangement

### 4.3.1 Procedure for the Preparation of Oxirane (**5a**)

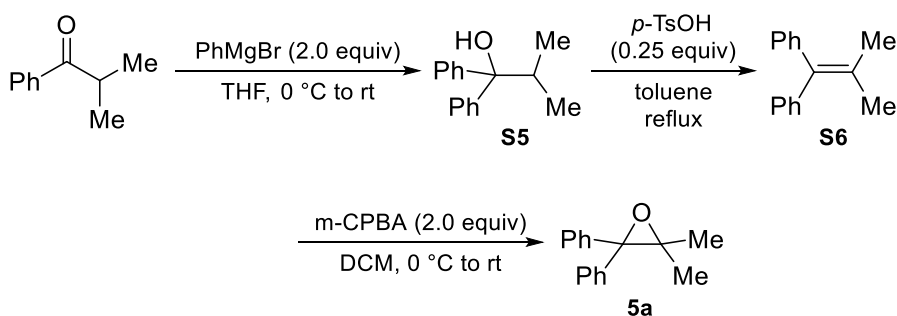

**Step 1:** Under  $\text{N}_2$  atmosphere, 2-Hydroxy-2-methyl-1-phenylpropan-1-one (3.0 mL, 20 mmol) was dissolved into THF (20 mL). After cooling at 0 °C, a solution of

phenylmagnesium bromide (40 mL, 40 mmol, 1 M solution in THF) was added dropwise, and the reaction mixture was warmed to room temperature. The reaction progress was continuously monitored by thin layer chromatography. Upon completion, the reaction was quenched by sat.  $\text{NH}_4\text{Cl}$  aq., and the mixture was extracted several times with EtOAc. The combined organic layer was washed with brine, dried over  $\text{Na}_2\text{SO}_4$ , and the solvent was removed under reduced pressure. The resulting compound **S5** was pure enough (yellow oil, 4.25 g, 94%), and so used in the next reaction without purification.

**Step 2:** Under  $\text{N}_2$  atmosphere, alcohol **S5** (4.25 g, 18.8 mmol) was dissolved into toluene (20 mL). To the solution, *p*-TsOH (809.3 mg, 4.7 mmol) was added, and the reaction mixture was stirred under reflux. The reaction was monitored by thin layer chromatography until consumption of starting material was observed. The reaction mixture was cooled to room temperature and quenched by sat.  $\text{NaHCO}_3$  aq., and the mixture was extracted three times with  $\text{Et}_2\text{O}$ . The combined organic layer was washed with brine, dried over  $\text{Na}_2\text{SO}_4$ , and the solvent was removed under reduced pressure. The resulting compound **S6** was pure enough (yellow oil, 2.54 g, 65%), and so used in the next reaction without purification.

**Step 2:** Alkene **S6** (2.54 g, 12.2 mmol) was dissolved in dehydrate  $\text{CH}_2\text{Cl}_2$  (10.0 mL), and the solution was cooled to 0 °C. To the solution, *m*-CPBA (70% purity; 6.0 g, 24 mmol) was added in batches. The reaction mixture was then allowed to stir at room temperature, and the reaction progress was monitored by thin layer chromatography. Upon completion, the reaction was quenched by sat.  $\text{Na}_2\text{S}_2\text{O}_3$  aq., and extracted three times with  $\text{CH}_2\text{Cl}_2$ . The combined organic layer was dried over  $\text{Na}_2\text{SO}_4$ , and the solvent was removed under reduced pressure. The residue was purified by column chromatography to obtain epoxide **5a**.

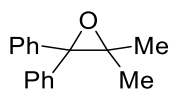

### 2,2-dimethyl-3,3-diphenyloxirane (**5a**)

White solid (2.2 g, 49% (three steps)); mp 62-63 °C;  $^1\text{H}$  NMR (400 MHz,  $\text{CDCl}_3$ ):  $\delta$  = 1.21 (s, 6H), 7.22 (t,  $J$  = 7.6 Hz, 2H), 7.31 (t,  $J$  = 7.6 Hz, 4H), 7.46 (d,  $J$  = 7.6 Hz, 4H);  $^{13}\text{C}$  NMR (100 MHz,  $\text{CDCl}_3$ ):  $\delta$  = 21.8, 65.2, 71.2, 127.0, 127.1, 128.1, 140.4; IR (KBr): 2957, 1447, 1198, 1076, 925, 765, 703  $\text{cm}^{-1}$ ; HRMS (ESI):  $[\text{M}+\text{H}]^+$  calcd for  $\text{C}_{16}\text{H}_{17}\text{O}^+$ , 225.1274; found,  $m/z$  225.1278.

### 4.3.2 House-Meinwald Rearrangement of Oxirane (**5a**)

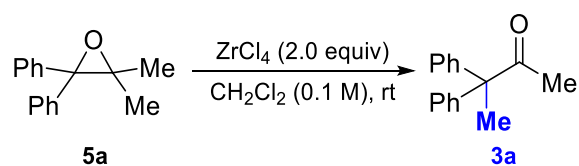

The epoxide **5a** (0.1 mmol) was dissolved in dehydrated CH<sub>2</sub>Cl<sub>2</sub> (1.0 mL) and ZrCl<sub>4</sub> (46.6 mg, 0.2 mmol) was added. The reaction mixture was stirred at room temperature under N<sub>2</sub>, and the reaction progress was monitored by thin layer chromatography. Upon completion, the reaction was quenched by sat. NaHCO<sub>3</sub> aq., and extracted three times with CH<sub>2</sub>Cl<sub>2</sub>. The combined organic layer was dried over Na<sub>2</sub>SO<sub>4</sub>, and the solvent was removed under reduced pressure. The residue was purified by preparative thin layer chromatography (*n*-Hexane : EtOAc = 5 : 1) to afford 3,3-diphenylbutan-2-one **3a** (19.1 mg, 85%) as a colorless oil.

## Reference

- 1) a) U. Scheffler, R. Mahrwald, *Helv. Chem. Acta*, **2012**, *95*, 1970-1975.  
b) U. Scheffler, R. Stößer, R. Mahrwald, *Adv. Synth. Catal.* **2012**, *354*, 2648-2652.
- 2) Z. Hou, K. Takamine, O. Aoki, H. Shiraishi, Y. Fujiwara, H. Taniguchi, *J. Org. Chem.* **1988**, *53*, 6077-6084.
- 3) M. Takeda, A. Mitsui, K. Nagao, H. Ohmiya, *J. Am. Chem. Soc.* **2019**, *141*, 3664-3669.
- 4) S. H. Graham, A. J. S. Williams, *J. Chem. Soc.* **1959**, 4066-4073.
- 5) F. M. Piller, P. Appukkuttan, A. Gavryushin, M. Helm, P. Knochel, *Angew. Chem. Int. Ed.* **2008**, *47*, 6802-6806.
- 6) LiCl which was dried under vacuum at 150 °C for 5h was used.
- 7) Grignard reagents were prepared according to the following method. A 100 mL three-neckround bottom flask equipped with a reflux condenser and dropping funnel was charged with magnesium turnings (1.46 g, 60.0 mmol). The system was evacuated, flame dried, cooled, and backfilled with Ar. The magnesium turnings were stirred vigorously at room temperature for 30 min. Then, the turnings were suspended in THF (10 mL) and a small crystal of I<sub>2</sub> was added. The dropping funnel was charged with solution of alkyl bromide (50.0 mmol) in THF (40 mL), and the solution was added to the magnesium turnings dropwise over 30 min. The reaction mixture was maintained at room temperature for additional 1 h. The reaction mixture was transferred *via* cannula into a flame dried Schlenk flask.
- 8) IBX was prepared by the following procedure.
  - a) M. Frigerio, M. Santagostino, S. Sputore, *J. Org. Chem.* **1999**, *64*, 4537-4538.  
For selected reports about the IBX oxidation, see: (b) M. Frigerio, M. Santagostino, *Tetrahedron Lett.* **1994**, *35*, 8019-8022. (c) J. D. More, N. S. Finney, *Org. Lett.* **2002**, *4*, 3001-3003. (d) K. C. Nicolaou, T. Montagnon, P. S. Baran, Y.-L. Zhong, *J. Am. Chem. Soc.* **2002**, *124*, 2245-2258.
- 9) V. Blokker, P. de Mayo, K. Muthuramu, *J. Org. Chem.* **1988**, *53*, 5567-5568.
- 10) R. M. Burk, M. B. Roof, *Tetrahedron Lett.* **1993**, *34*, 395-398.
- 11) (a) A. R. Mattocks, *J. Chem. Soc.* **1964**, 1918-1930.  
(b) D. H. G. Crout, D. Whitehouse, *J. Chem. Soc., Perkin Trans. 1*, **1977**, 544-549.
- 12) L. Tan, C.-Y. Chen, W. Chen, L. Frey, A. O. King, R. D. Tillyer, F. Xu, D. Zhao, E. J. Grabowski, P. J. Reider, P. O'Shea, P. Dagneau, X. Wang, *Tetrahedron* **2002**, *58*, 7403-7410.
- 13) C.-T. Li, H. Liu, Y. Yao, C.-D. Lu, *Org. Lett.* **2019**, *21*, 8383-8388.
- 14) F. Cimate, L. Lopez, A. Nacci, L. D'Accolti, F. Vitale, *Eur. J. Org. Chem.* **2005**,

- 1597-1603.
- 15) M. Padmanaban, A. T. Biju, F. Glorius, *Org. Lett.* **2011**, *13*, 98-101.
  - 16) D. C. Moebius, J. S. Kingsbury, *J. Am. Chem. Soc.* **2009**, *131*, 878-879.
  - 17) (a) M. Lessi, T. Masini, L. Nucara, F. Bellina, R. Rossi, *Adv. Synth. Catal.* **2011**, *353*, 501-507.  
(b) Z. Wang, M. Li, W. Zhang, J. Jia, F. Wang, S. Xue, *Tetrahedron Lett.* **2011**, *52*, 5968-5971.
  - 18) M. B. Díaz-Valenzuela, S. D. Phillips, M. B. France, M. E. Gunn, M. L. Clarke, *Chem. Eur. J.* **2009**, *15*, 1227-1232.
  - 19) S. Chakrabarty, J. M. Takacs, *ACS. Catal.* **2018**, *8*, 10530-10536.
  - 20) I. Fleming, U. Ghosh, *J. Chem. Soc., Perkin Trans. 1*, **1994**, 257-262.
  - 21) A. G. Smith, J. S. Johnson, *Org. Lett.* **2010**, *12*, 1784-1787.
  - 22) J. M. Fox, X. Huang, A. Chieffi, S. L. Buchwald, *J. Am. Chem. Soc.* **2000**, *122*, 1360-1370.

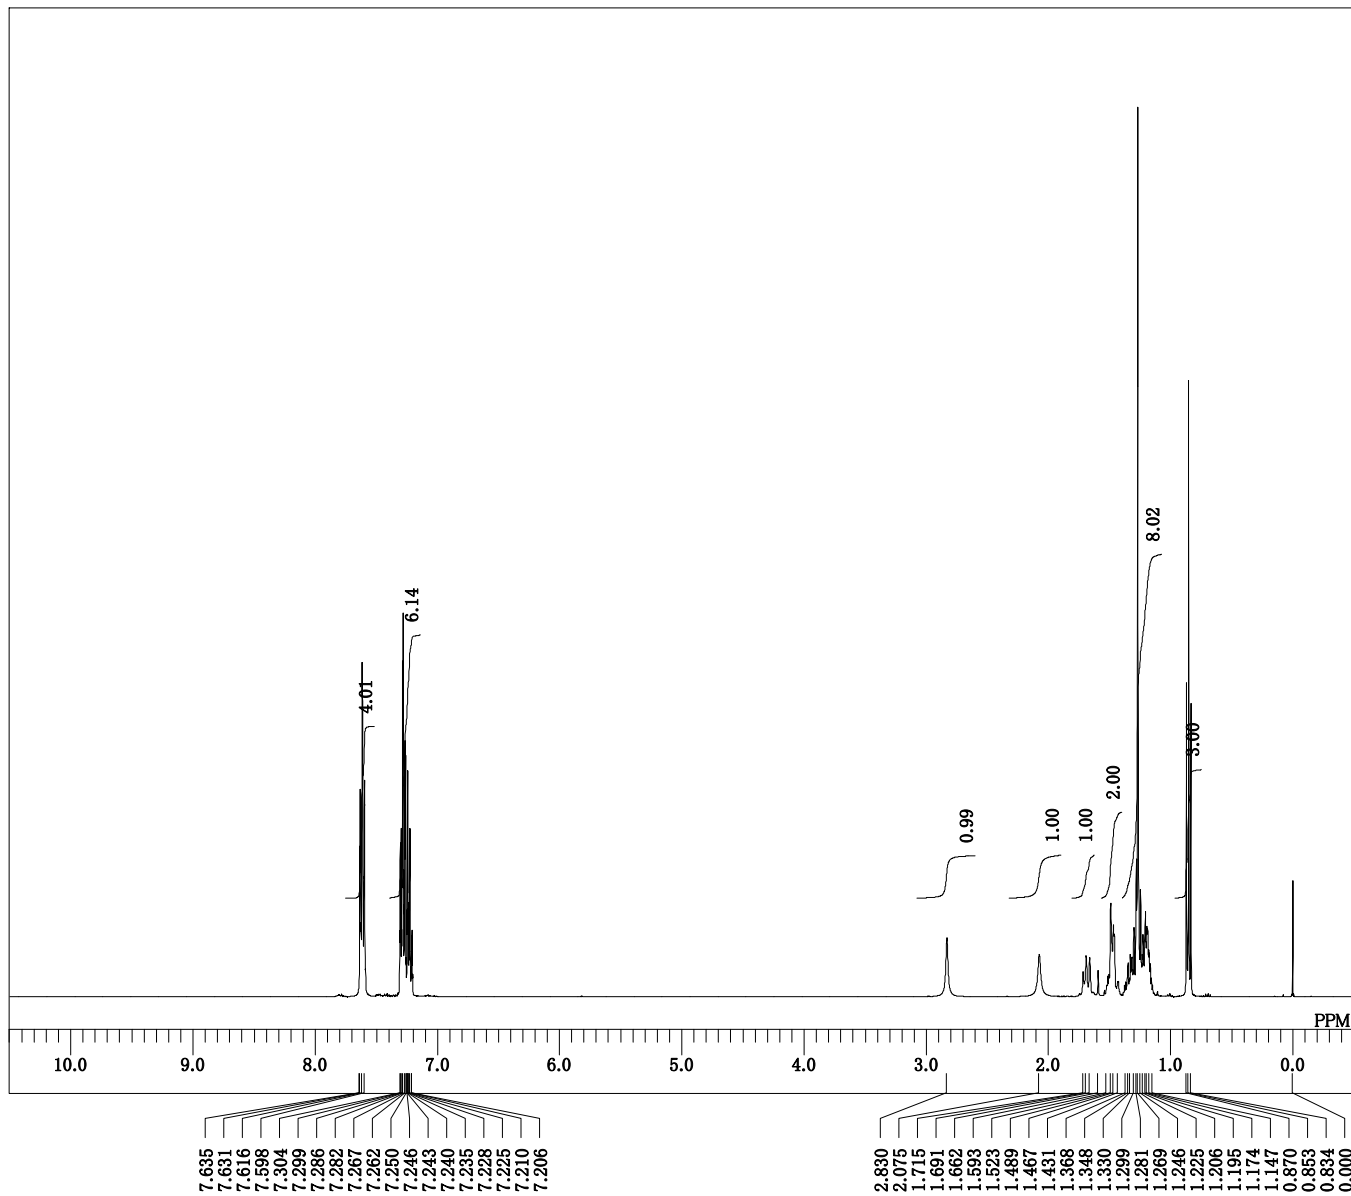

DFILE diol\_PhPhMenPentyl\_Proton.als  
 COMNT single\_pulse  
 DATIM 2022-04-25 23:19:16  
 OBNUC 1H  
 EXMOD proton.jxp  
 OBFRQ 395.88 MHz  
 OBSET 6.28 KHz  
 OBFIN 0.87 Hz  
 POINT 16384  
 FREQU 7422.80 Hz  
 SCANS 8  
 ACQTM 2.2073 sec  
 PD 5.0000 sec  
 PW1 3.25 usec  
 IRNUC 1H  
 CTEMP 20.5 c  
 SLVNT CDCL3  
 EXREF 0.00 ppm  
 BF 0.12 Hz  
 RGAIN 20

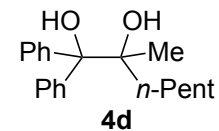

DFILE diol\_PhPhMenPentyl\_Carbon.als  
 COMNT single pulse decoupled gated NOE  
 DATIM 2022-04-25 23:22:03  
 OBNUC 13C  
 EXMOD carbon.jxp  
 OBFRQ 99.55 MHz  
 OBSET 5.13 KHz  
 OBFIN 0.98 Hz  
 POINT 32767  
 FREQU 31250.00 Hz  
 SCANS 1024  
 ACQTM 1.0486 sec  
 PD 2.0000 sec  
 PW1 3.67 usec  
 IRNUC 1H  
 CTEMP 20.2 c  
 SLVNT CDCL3  
 EXREF 0.00 ppm  
 BF 0.12 Hz  
 RGAIN 50

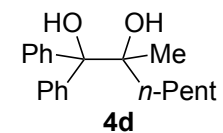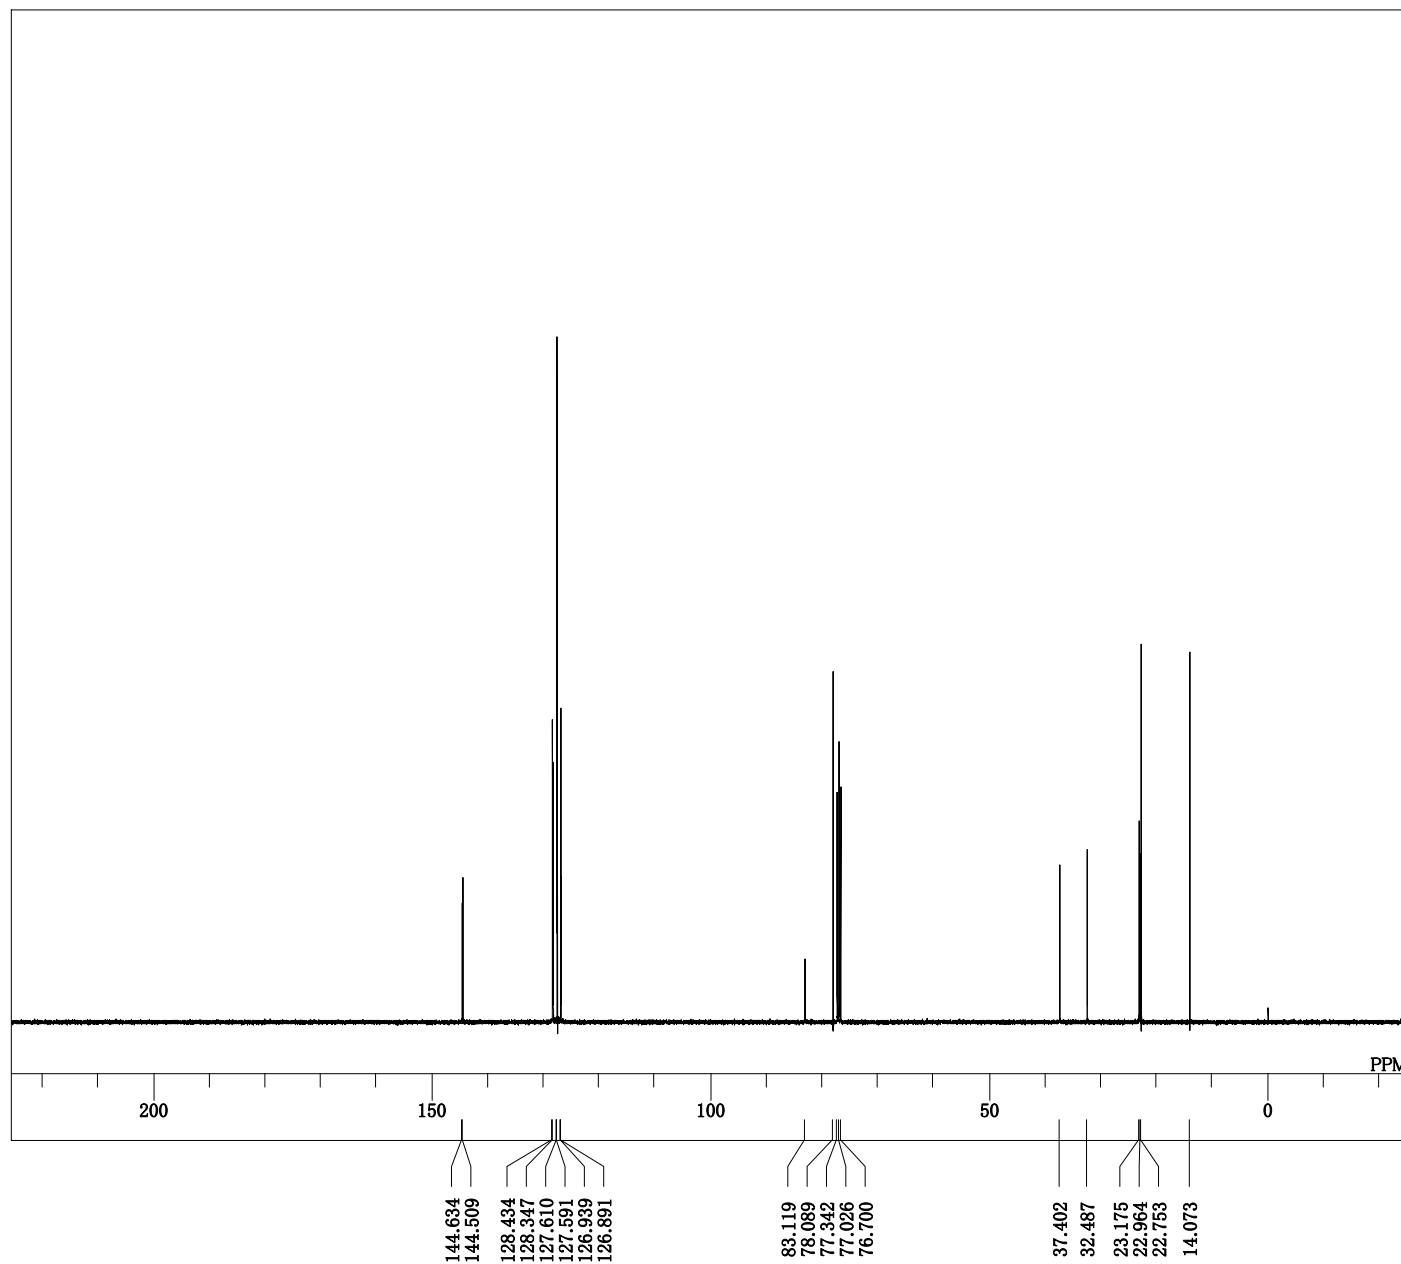



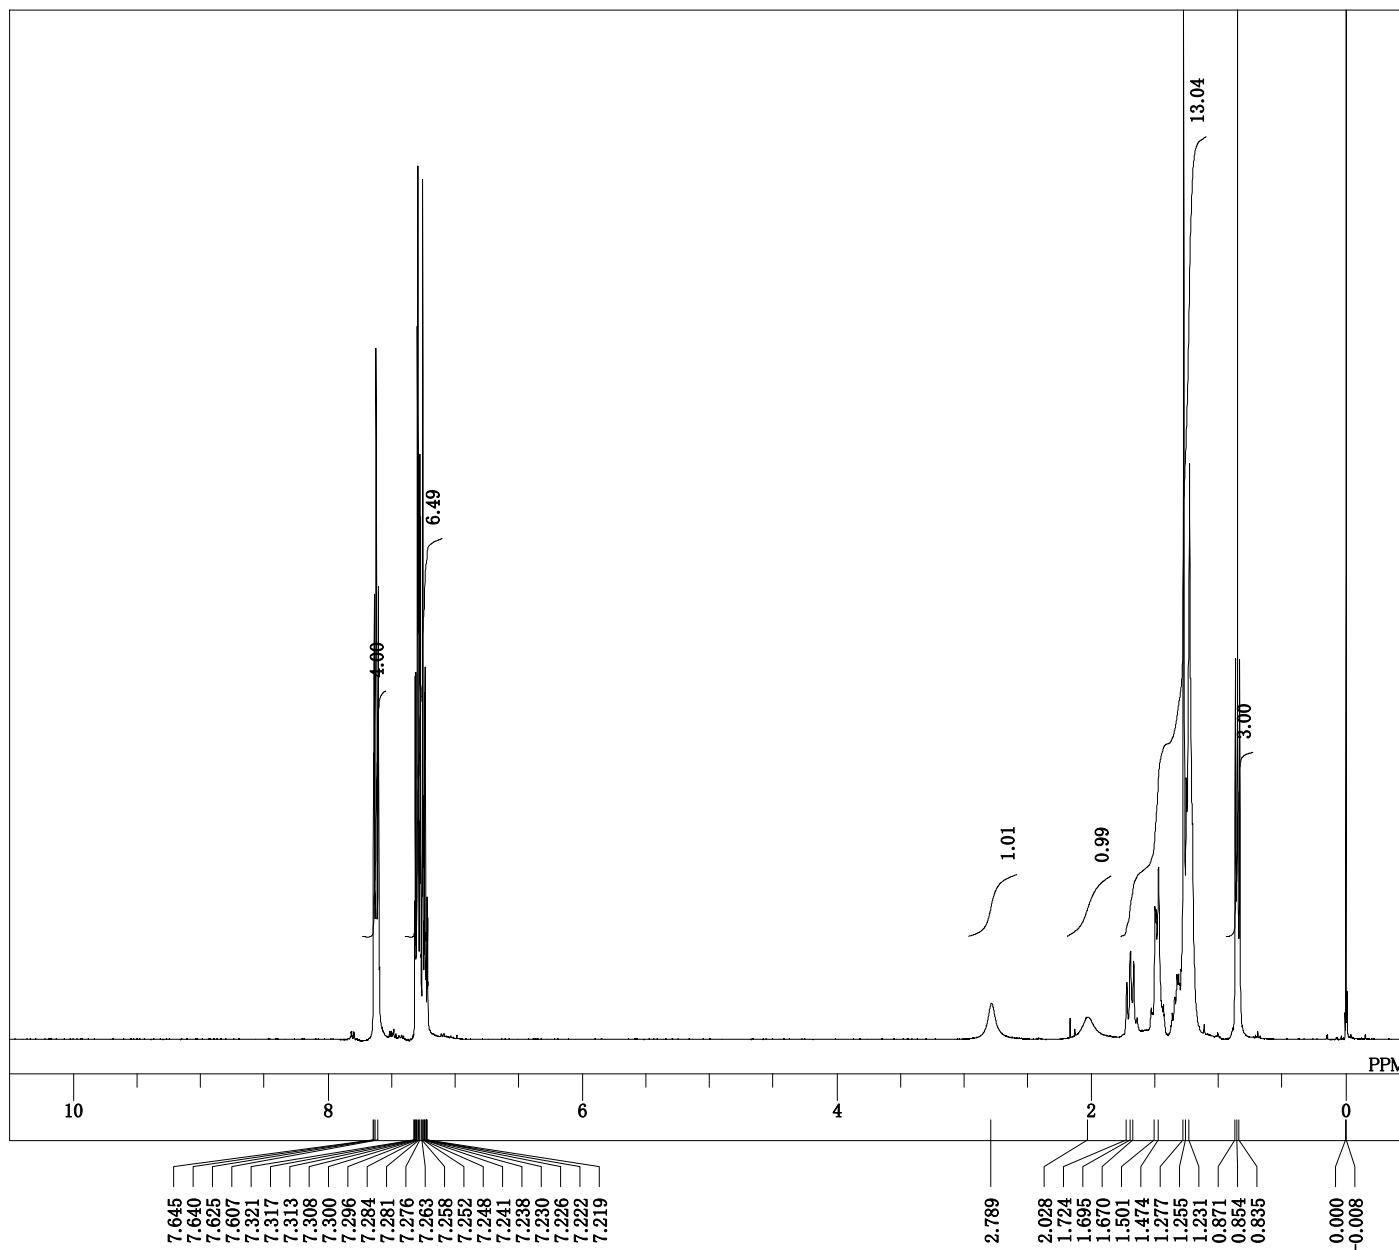

DFILE diol\_Me\_nHex\_Proton.als  
 COMNT single\_pulse  
 DATIM 2020-02-24 08:45:15  
 OBNUC 1H  
 EXMOD proton.jxp  
 OBFRQ 395.88 MHz  
 OBSET 6.28 KHz  
 OBFIN 0.87 Hz  
 POINT 13107  
 FREQU 5938.24 Hz  
 SCANS 8  
 ACQTM 2.2073 sec  
 PD 5.0000 sec  
 PW1 3.14 usec  
 IRNUC 1H  
 CTEMP 20.1 c  
 SLVNT CDCL3  
 EXREF 0.00 ppm  
 BF 0.12 Hz  
 RGAIN 34

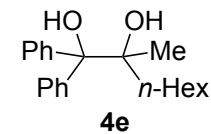

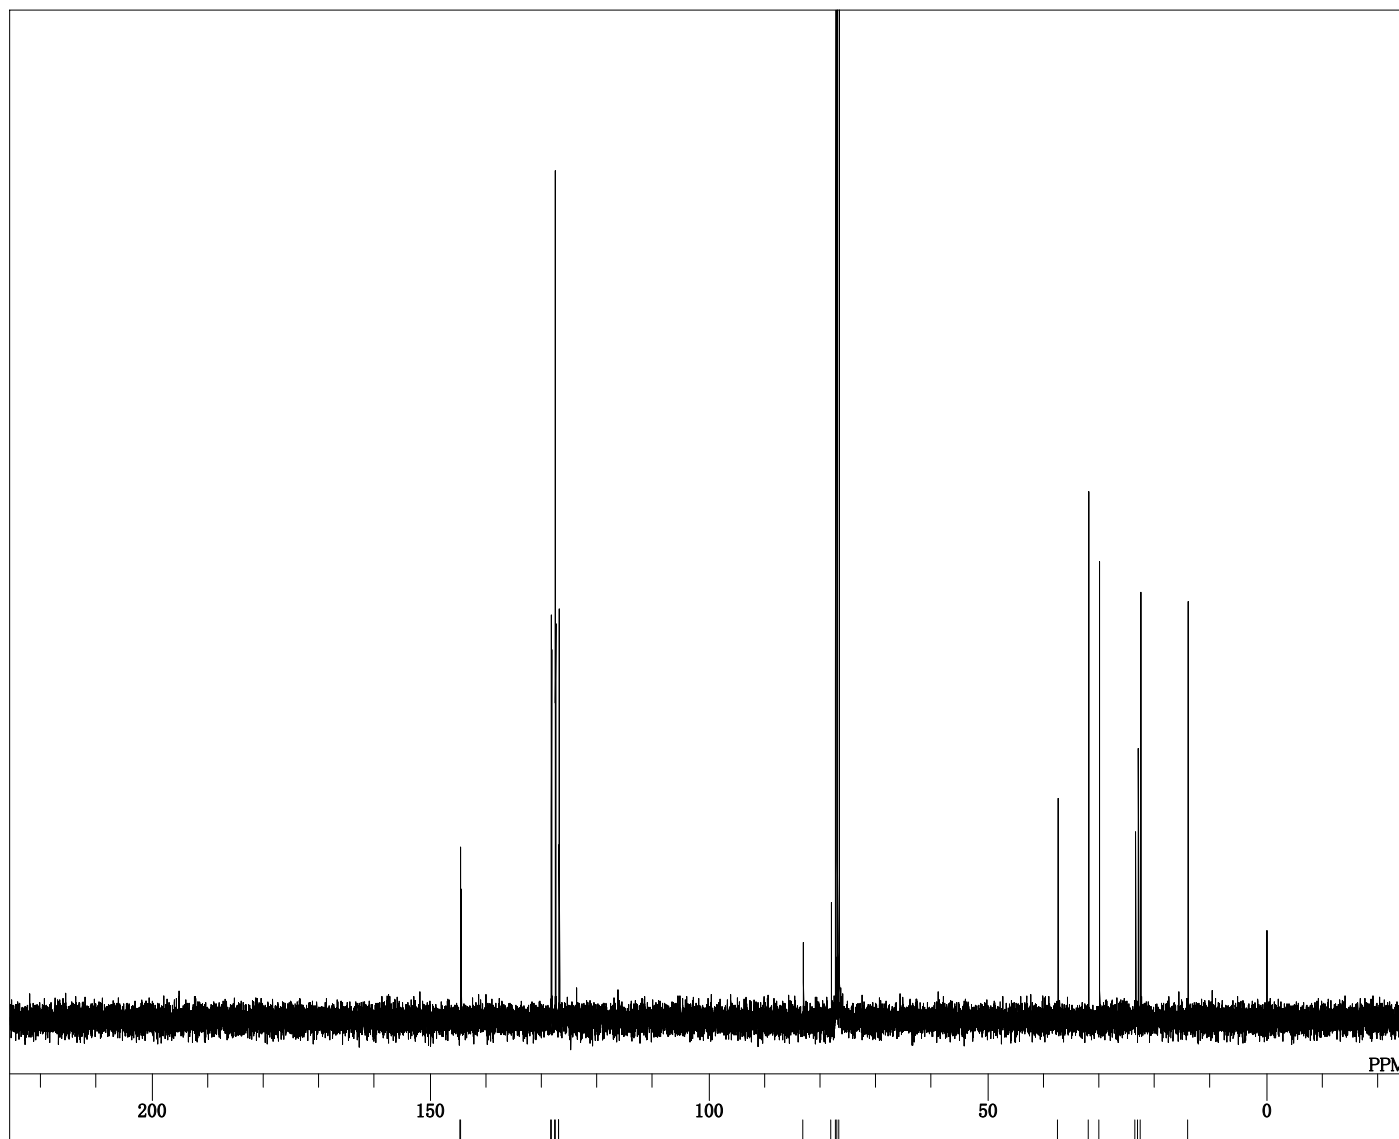

DFILE diol\_Me\_nHex\_Carbon.als  
 COMNT single pulse decoupled gated NOE  
 DATIM 2020-02-24 08:46:27  
 OBNUC <sup>13</sup>C  
 EXMOD carbon.jxp  
 OBFRQ 99.55 MHz  
 OBSET 5.13 KHz  
 OBFIN 0.98 Hz  
 POINT 26214  
 FREQU 25000.00 Hz  
 SCANS 1024  
 ACQTM 1.0486 sec  
 PD 2.0000 sec  
 PW1 3.59 usec  
 IRNUC <sup>1</sup>H  
 CTEMP 20.3 c  
 SLVNT CDCL<sub>3</sub>  
 EXREF 77.00 ppm  
 BF 0.12 Hz  
 RGAIN 50

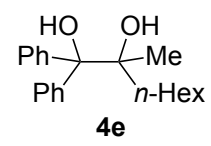

144.619  
 144.494  
 128.399  
 128.313  
 127.614  
 127.594  
 126.933  
 126.895

83.093  
 78.073  
 77.316  
 77.000  
 76.674

37.433  
 31.934  
 29.941  
 23.464  
 22.985  
 22.602  
 14.066

DFILE diol\_H\_pOMe\_Proton-1-1.als  
 COMNT single\_pulse  
 DATIM 2021-01-12 12:12:35  
 OBNUC 1H  
 EXMOD proton.jxp  
 OBFRQ 395.88 MHz  
 OBSET 6.28 KHz  
 OBFIN 0.87 Hz  
 POINT 13107  
 FREQU 5938.24 Hz  
 SCANS 8  
 ACQTM 2.2073 sec  
 PD 5.0000 sec  
 PW1 3.14 usec  
 IRNUC 1H  
 CTEMP 18.9 c  
 SLVNT CDCL3  
 EXREF 0.00 ppm  
 BF 0.12 Hz  
 RGAIN 40

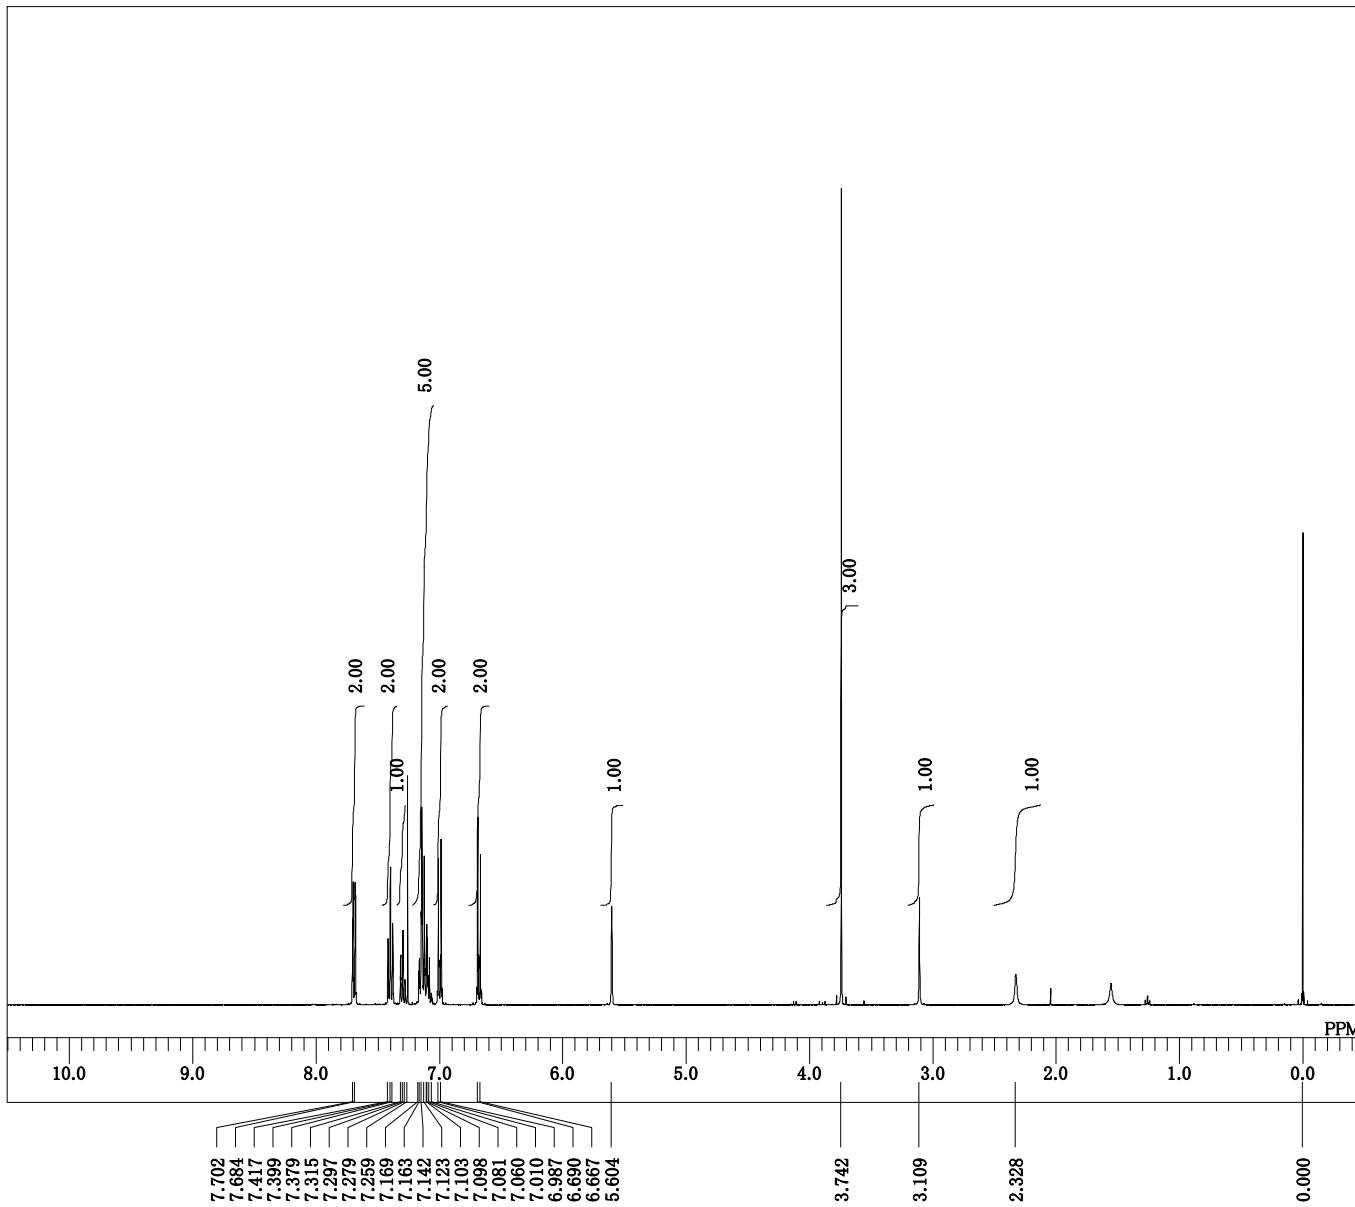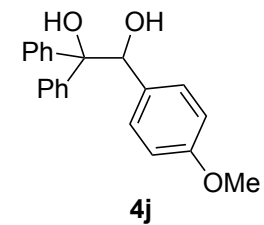

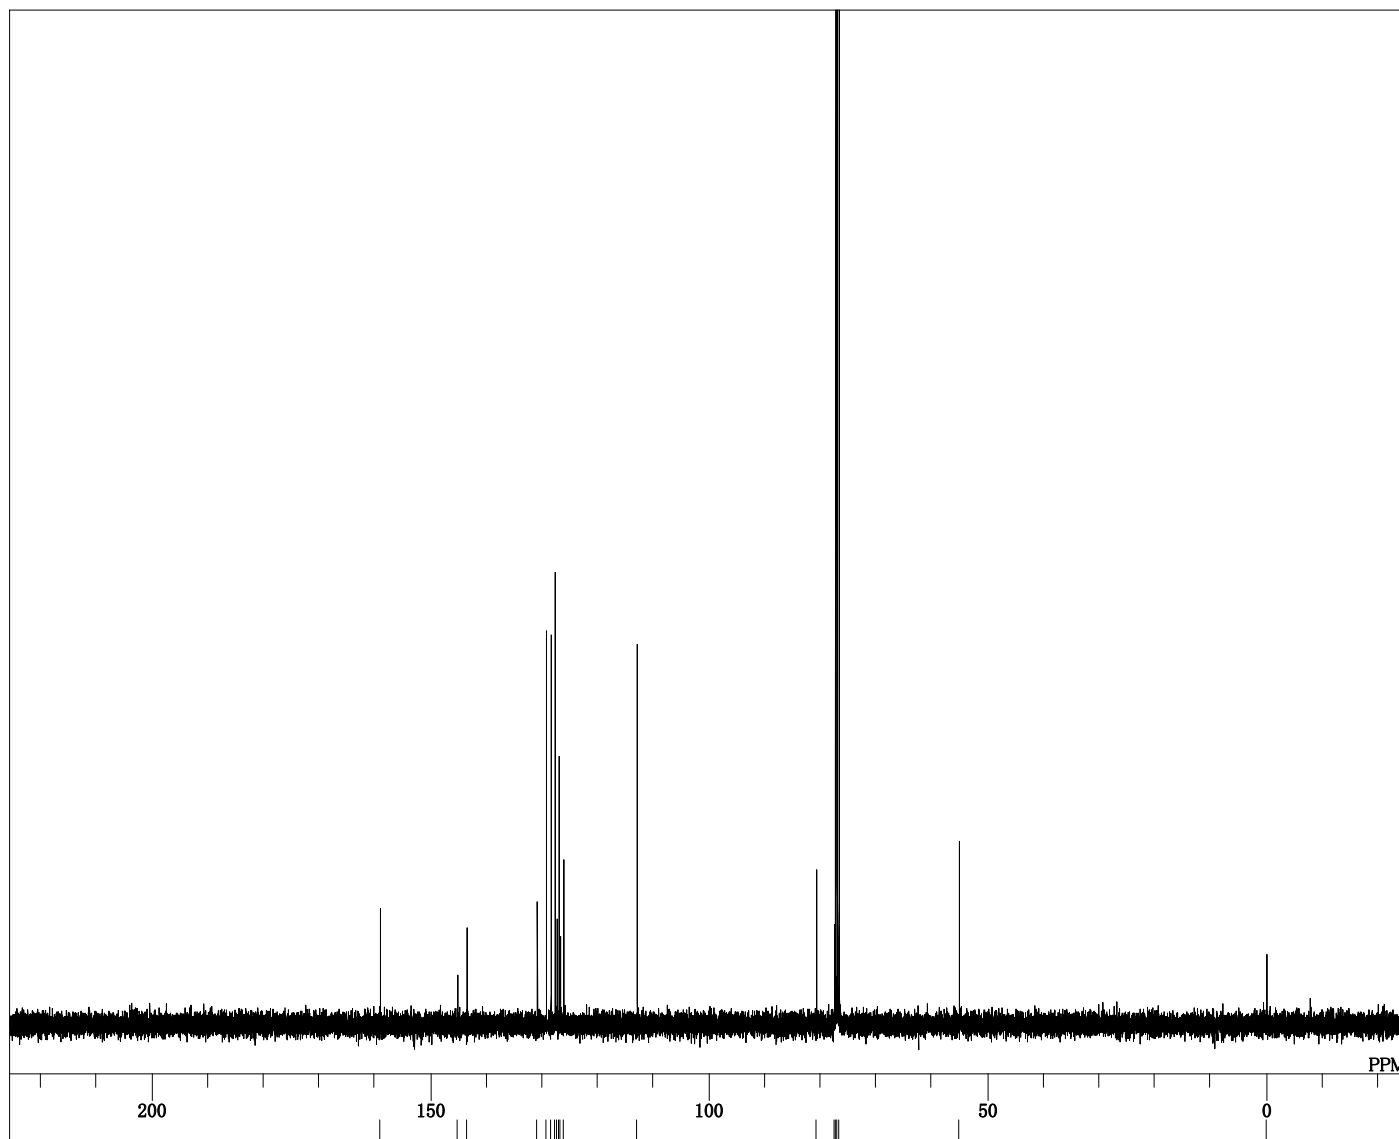

DFILE diol\_H\_pOMe\_Carbon-1-1.als  
 COMNT single pulse decoupled gated NOE  
 DATIM 2021-01-12 12:13:47  
 OBNUC <sup>13</sup>C  
 EXMOD carbon.jxp  
 OBFRQ 99.55 MHz  
 OBSET 5.13 KHz  
 OBFIN 0.98 Hz  
 POINT 26214  
 FREQU 25000.00 Hz  
 SCANS 925  
 ACQTM 1.0486 sec  
 PD 2.0000 sec  
 PW1 3.59 usec  
 IRNUC 1H  
 CTEMP 19.7 c  
 SLVNT CDCL3  
 EXREF 0.00 ppm  
 BF 0.12 Hz  
 RGAIN 50

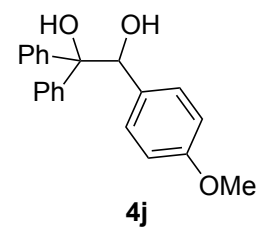

159.055  
 145.125  
 143.487  
 130.860  
 129.193  
 128.445  
 127.660  
 127.343  
 126.941  
 126.673  
 126.156  
 112.915

80.744  
 77.573  
 77.333  
 77.017  
 76.692

55.145

0.000

DFILE dioLH\_pF\_Proton-1-1.als  
 COMNT single\_pulse  
 DATIM 2021-01-07 13:18:48  
 OBNUC 1H  
 EXMOD proton.jxp  
 OBFRQ 395.88 MHz  
 OBSET 6.28 KHz  
 OBFIN 0.87 Hz  
 POINT 13107  
 FREQU 5938.24 Hz  
 SCANS 8  
 ACQTM 2.2073 sec  
 PD 5.0000 sec  
 PW1 3.14 usec  
 IRNUC 1H  
 CTEMP 19.2 c  
 SLVNT CDCL3  
 EXREF 0.00 ppm  
 BF 0.12 Hz  
 RGAIN 40

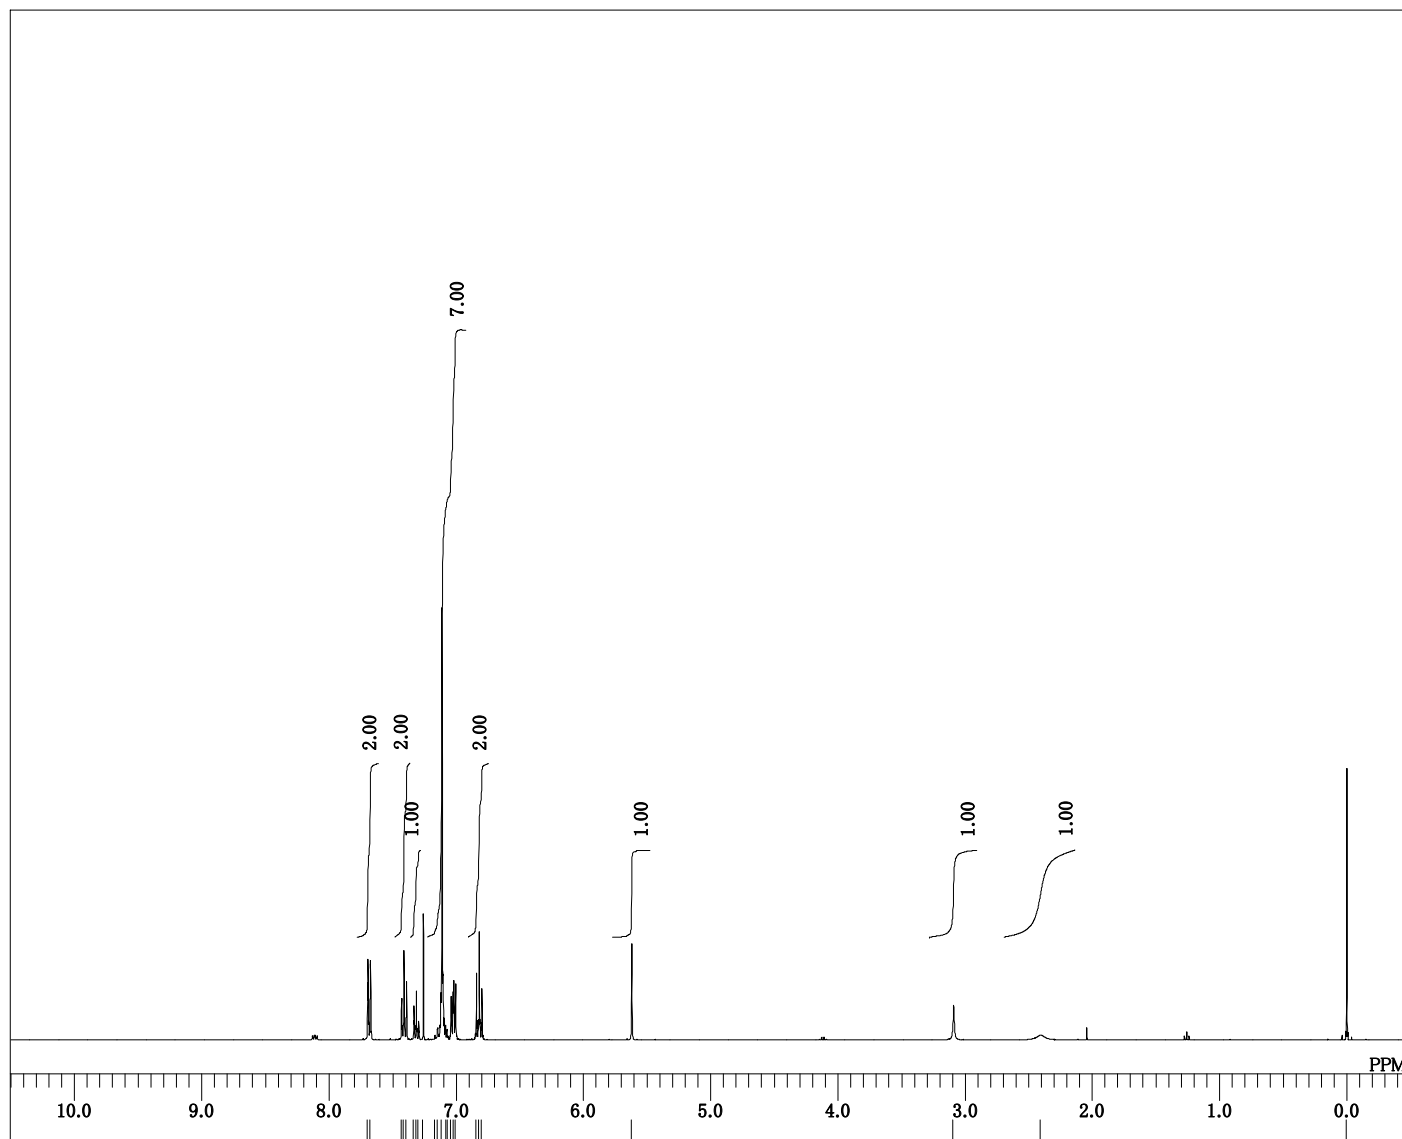

7.693  
 7.674  
 7.428  
 7.410  
 7.391  
 7.331  
 7.313  
 7.295  
 7.258  
 7.168  
 7.147  
 7.111  
 7.075  
 7.065  
 7.040  
 7.018  
 7.004  
 6.841  
 6.820  
 6.797  
 5.619

3.090

2.404

0.000

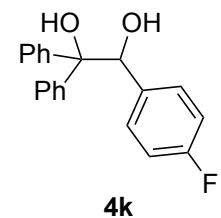

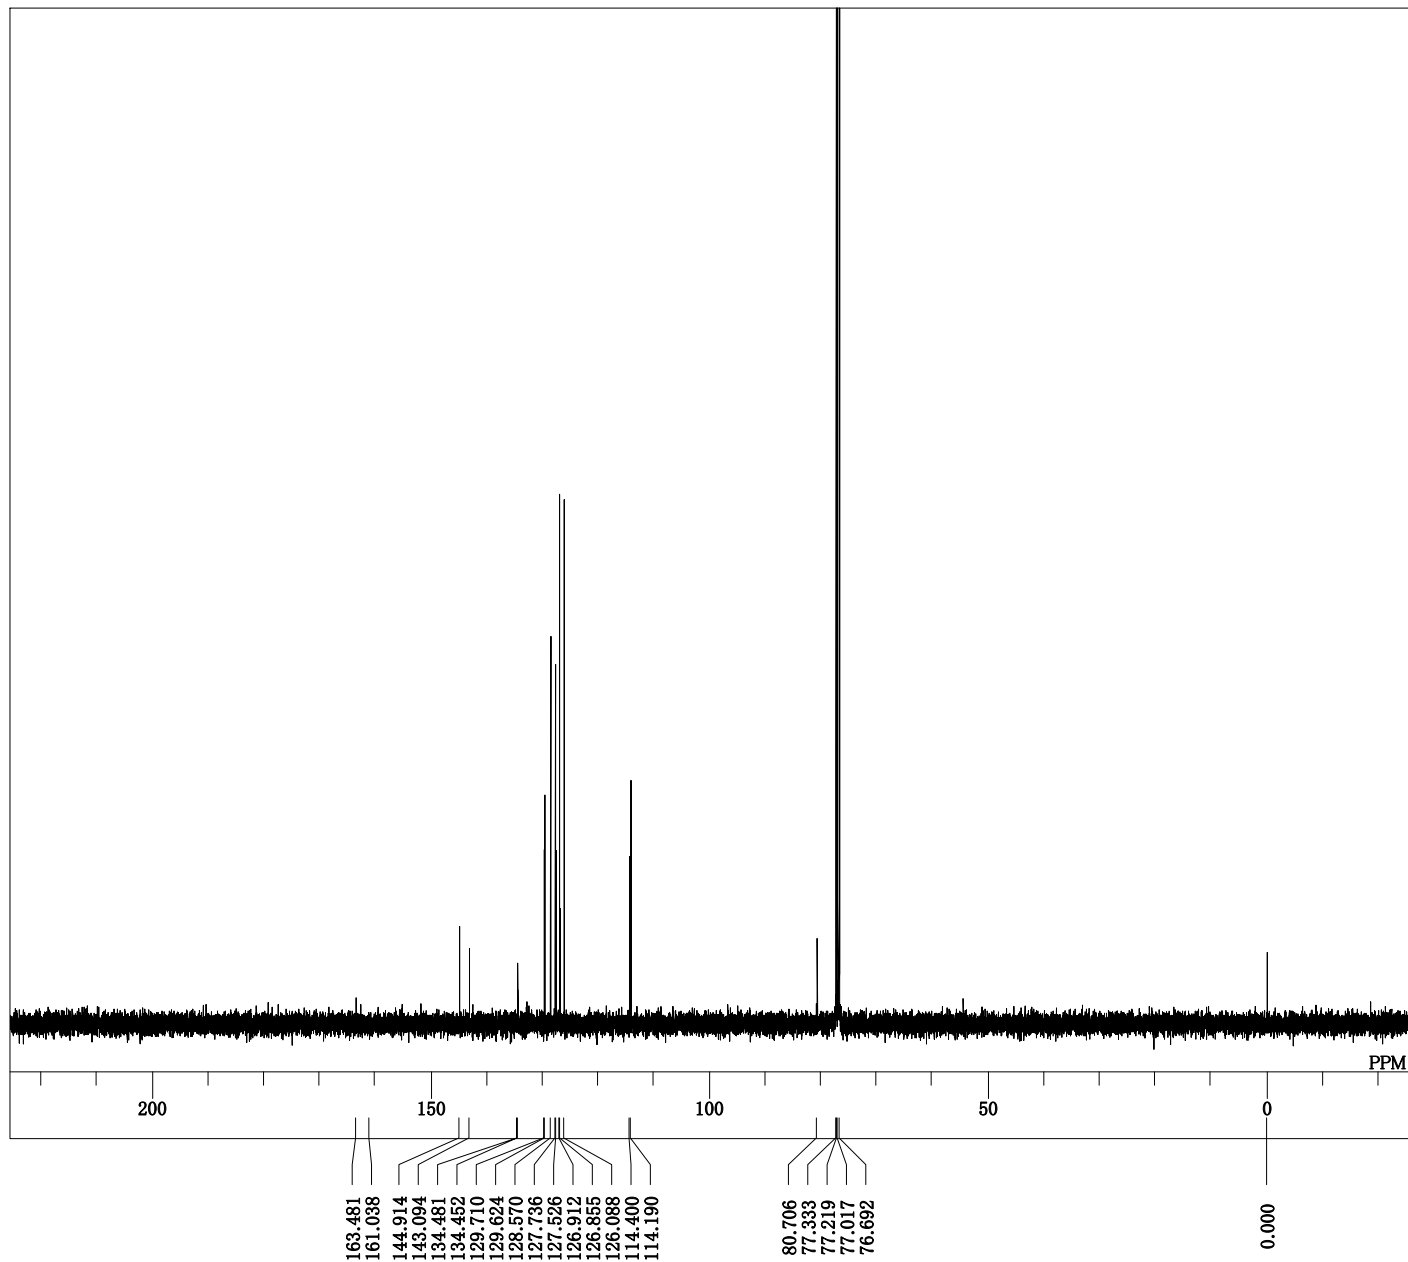

DFILE diol\_H\_pF\_Carbon-1-1.als  
 COMNT single pulse decoupled gated NOE  
 DATIM 2021-01-07 13:20:01  
 OBNUC 13C  
 EXMOD carbon.jxp  
 OBFRQ 99.55 MHz  
 OBSET 5.13 KHz  
 OBFIN 0.98 Hz  
 POINT 26214  
 FREQU 25000.00 Hz  
 SCANS 1024  
 ACQTM 1.0486 sec  
 PD 2.0000 sec  
 PW1 3.59 usec  
 IRNUC 1H  
 CTEMP 18.6 c  
 SLVNT CDCL3  
 EXREF 0.00 ppm  
 BF 0.12 Hz  
 RGAIN 50

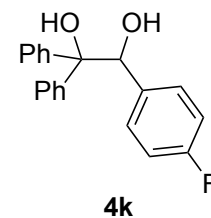

DFILE dio\_L\_H\_pF\_Fluorine.als  
COMNT single\_pulse  
DATIM 2022-07-04 21:20:03  
OBNUC 19F  
EXMOD single\_pulse.jxp  
OBFRQ 372.50 MHz  
OBSET 3.36 KHz  
OBFIN 6.86 Hz  
POINT 26214  
FREQU 149253.73 Hz  
SCANS 8  
ACQTM 0.1756 sec  
PD 5.0000 sec  
PW1 3.98 usec  
IRNUC 19F  
CTEMP 20.4 c  
SLVNT CDCL3  
EXREF -163.00 ppm  
BF 0.12 Hz  
RGAIN 42

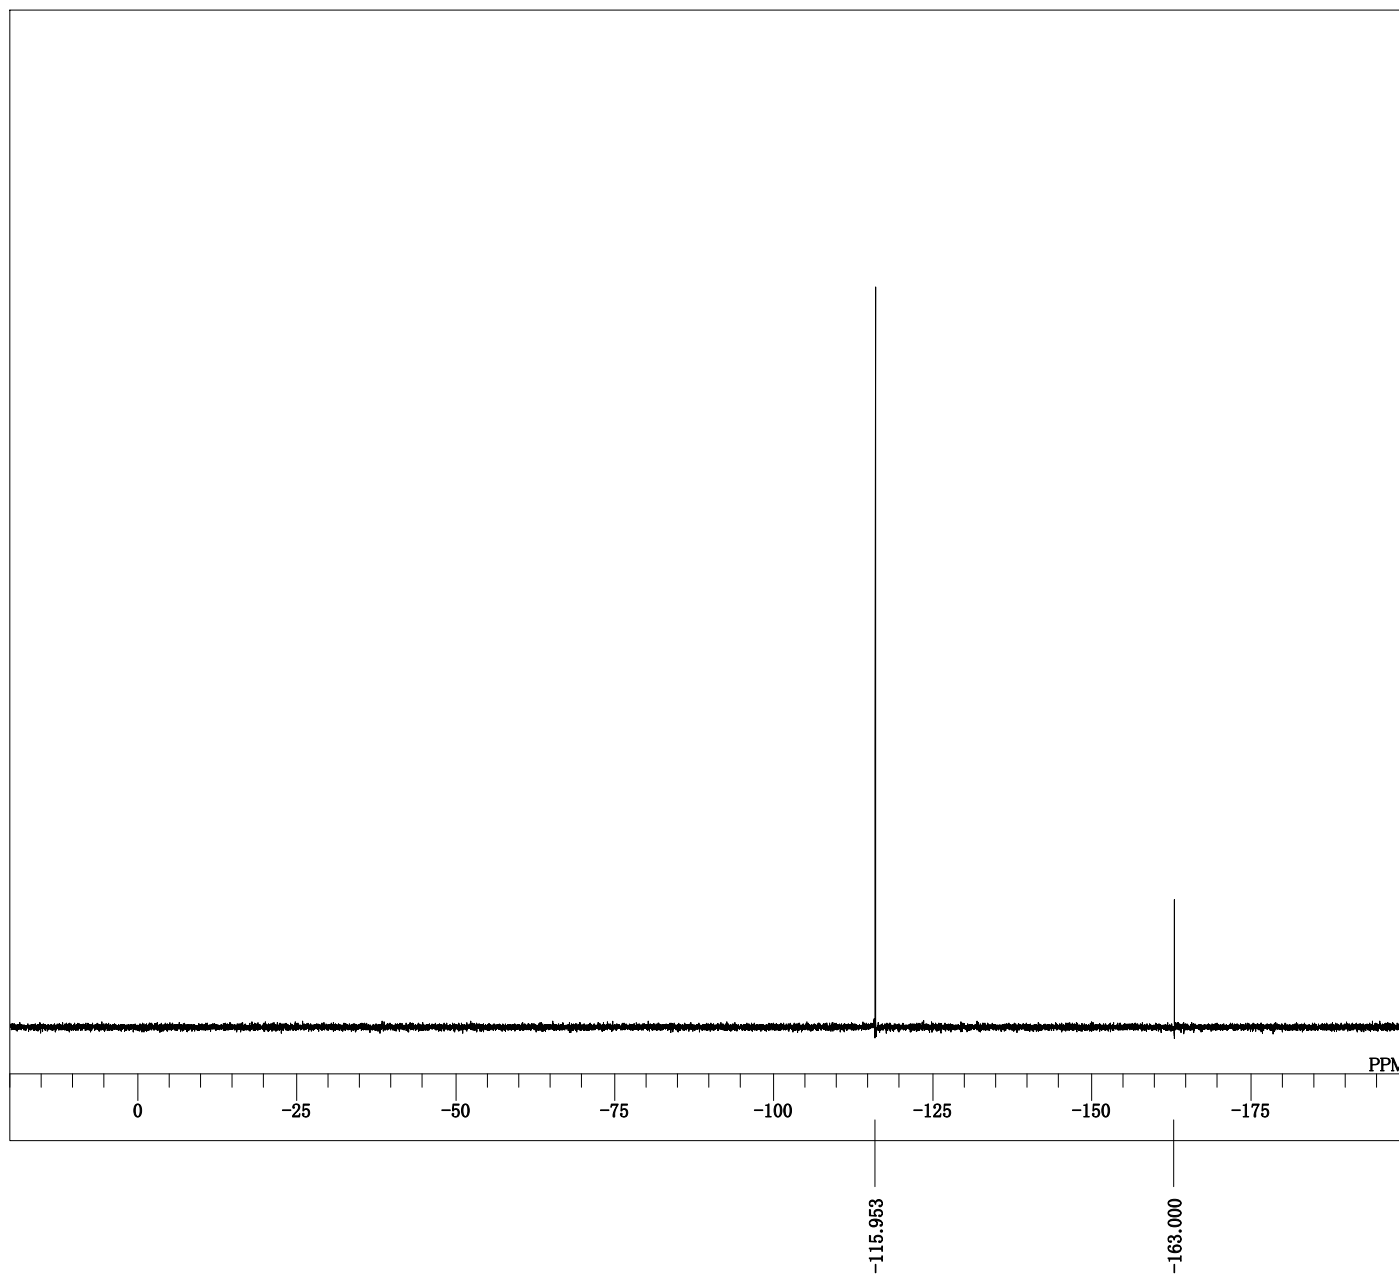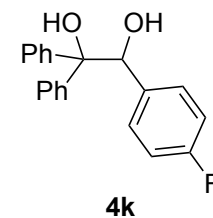

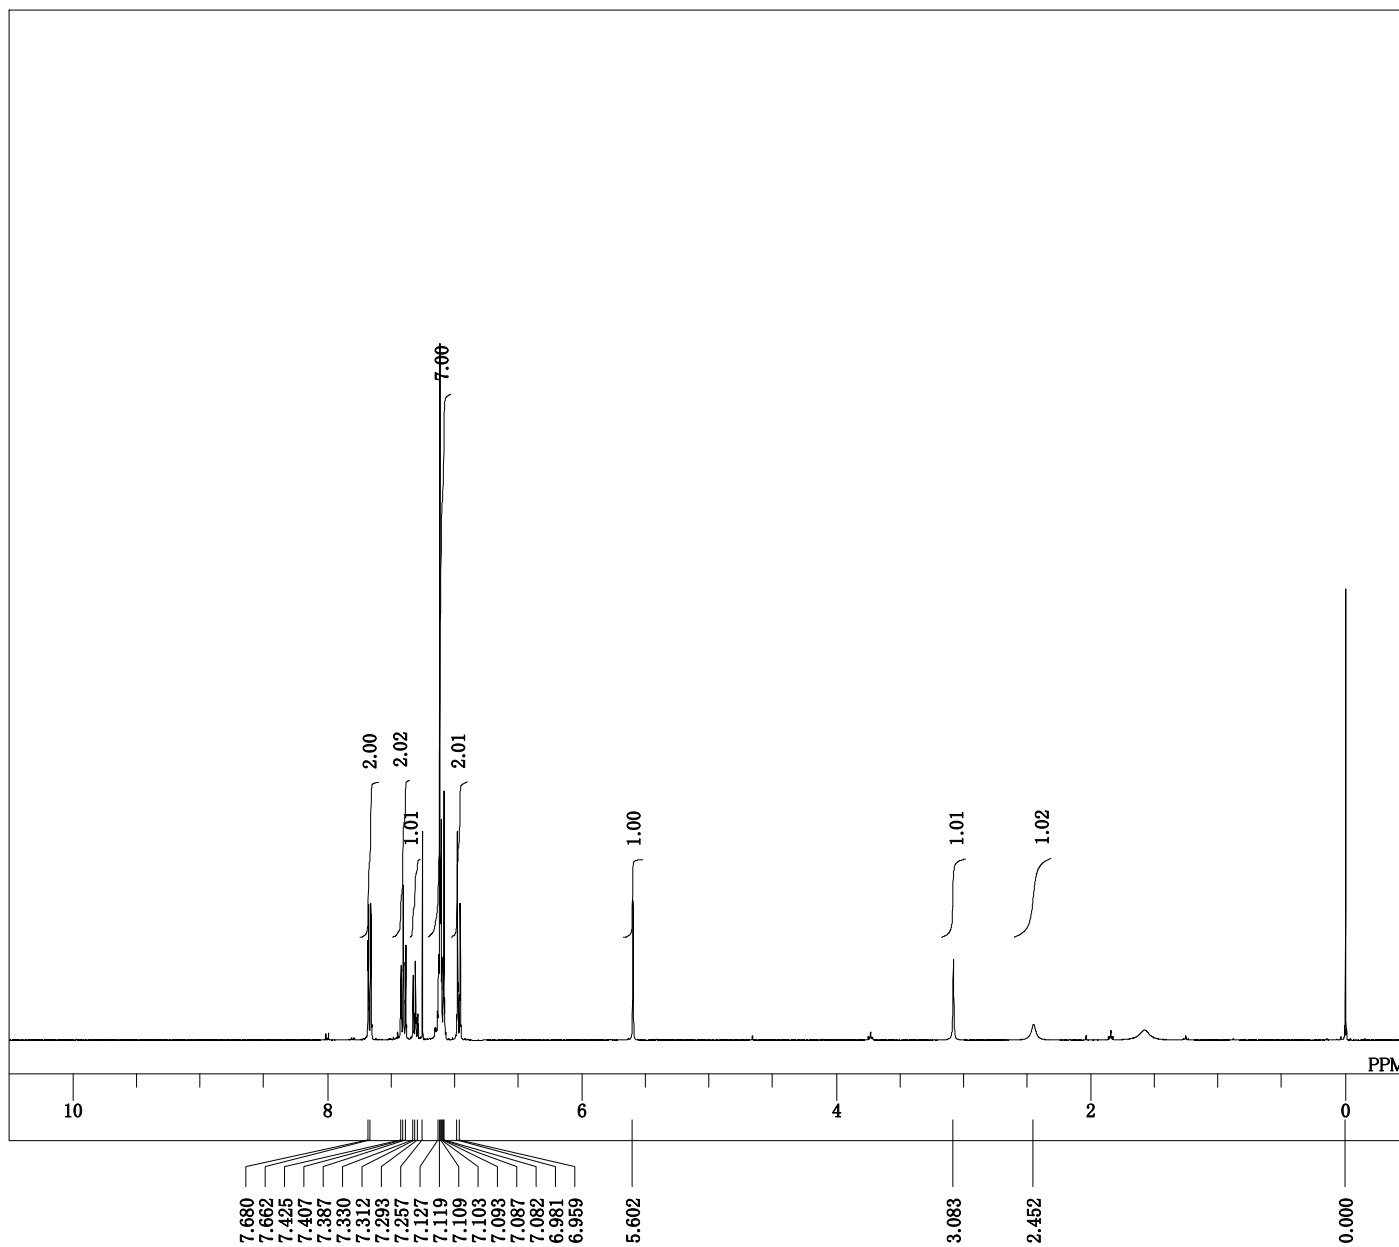

DFILE Ex638\_column\_Proton-1-1.als  
 COMNT single\_pulse  
 DATIM 2020-06-03 16:18:50  
 OBNUC 1H  
 EXMOD proton.jxp  
 OBFRQ 395.88 MHz  
 OBSET 6.28 KHz  
 OBFIN 0.87 Hz  
 POINT 13107  
 FREQU 5938.24 Hz  
 SCANS 8  
 ACQTM 2.2073 sec  
 PD 5.0000 sec  
 PW1 3.14 usec  
 IRNUC 1H  
 CTEMP 20.6 c  
 SLVNT CDCL3  
 EXREF 0.00 ppm  
 BF 0.12 Hz  
 RGAIN 38

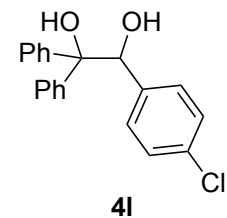



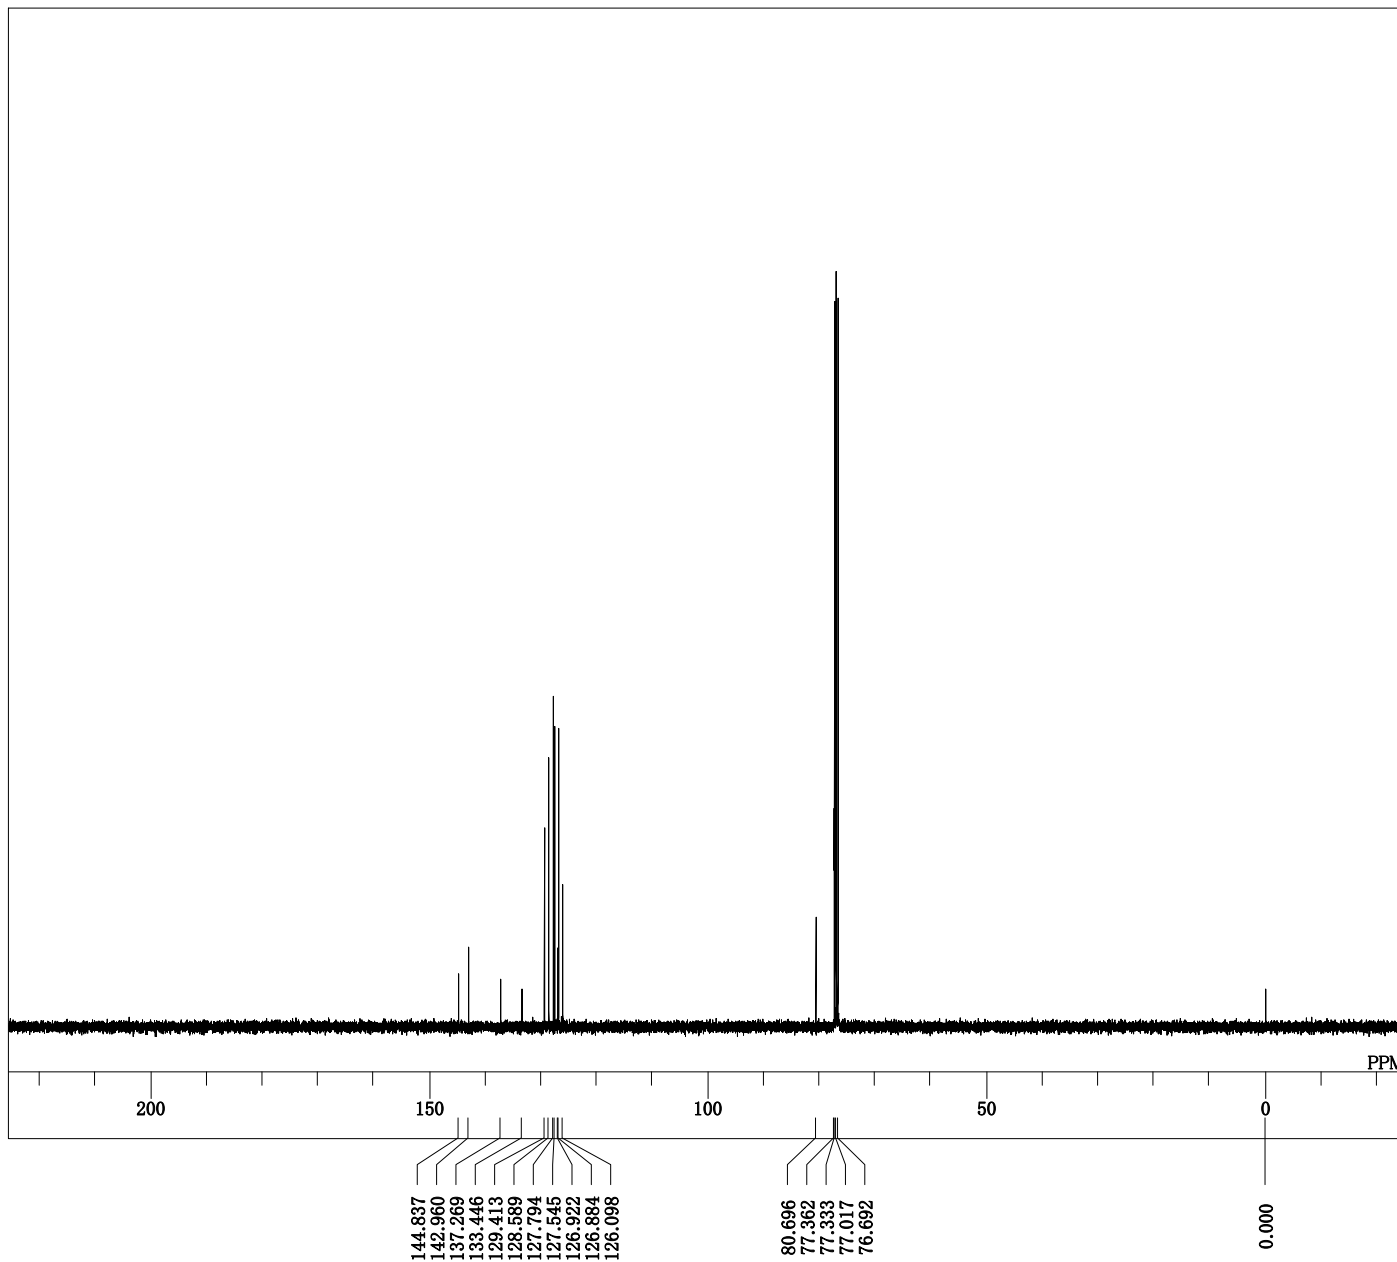

DFILE Ex638\_column\_Carbon-1-1.als  
 COMNT single pulse decoupled gated NOE  
 DATIM 2020-06-03 16:20:02  
 OBNUC 13C  
 EXMOD carbon.jxp  
 OBFRQ 99.55 MHz  
 OBSET 5.13 KHz  
 OBFIN 0.98 Hz  
 POINT 26214  
 FREQU 25000.00 Hz  
 SCANS 1024  
 ACQTM 1.0486 sec  
 PD 2.0000 sec  
 PW1 3.59 usec  
 IRNUC 1H  
 CTEMP 20.7 c  
 SLVNT CDCL3  
 EXREF 0.00 ppm  
 BF 0.12 Hz  
 RGAIN 50

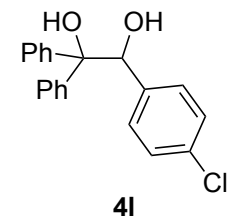

DFILE dioLpClpCl\_MeMe\_Proton.als  
COMNT  
DATIM Sun Nov 22 02:28:11 2020  
OBNUC 1H  
EXMOD NON  
OBFRQ 399.65 MHz  
OBSET 124.00 KHz  
OBFIN 10500.00 Hz  
POINT 16384  
FREQU 7992.01 Hz  
SCANS 8  
ACQTM 2.0500 sec  
PD 2.0000 sec  
PW1 6.60 usec  
IRNUC 1H  
CTEMP 6348.8 c  
SLVNT CDCL3  
EXREF 0.00 ppm  
BF 0.12 Hz  
RGAIN 18

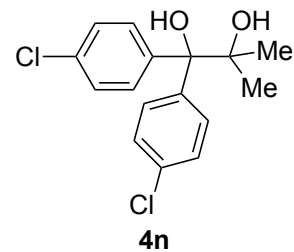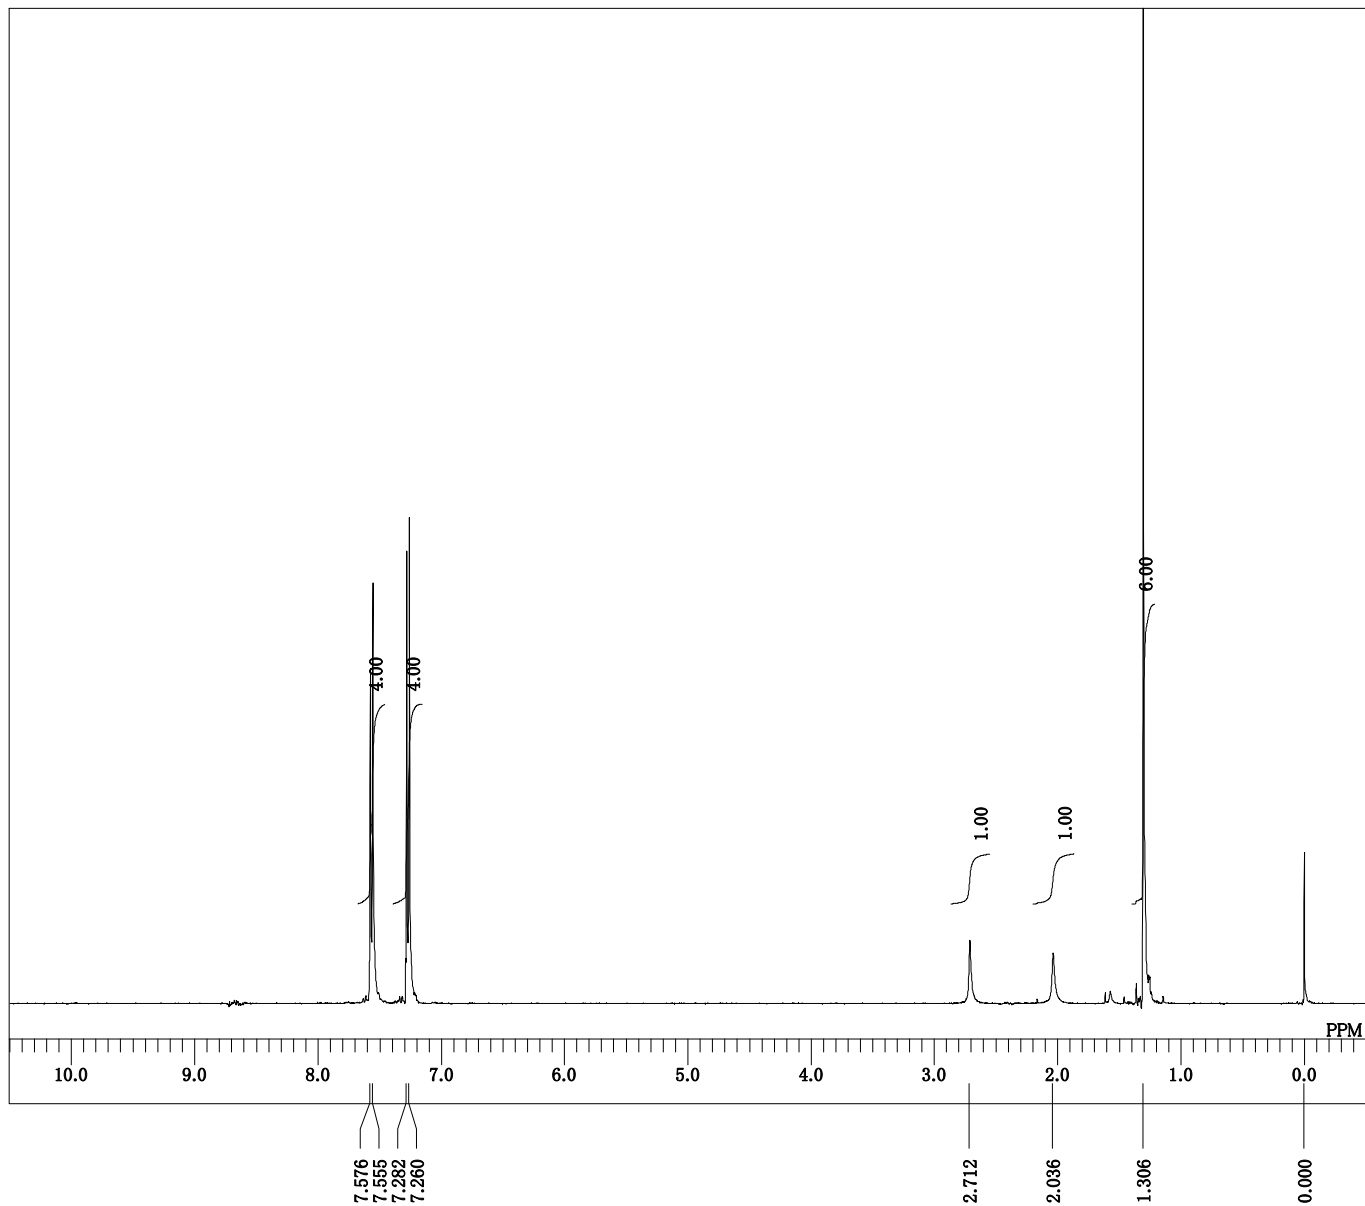

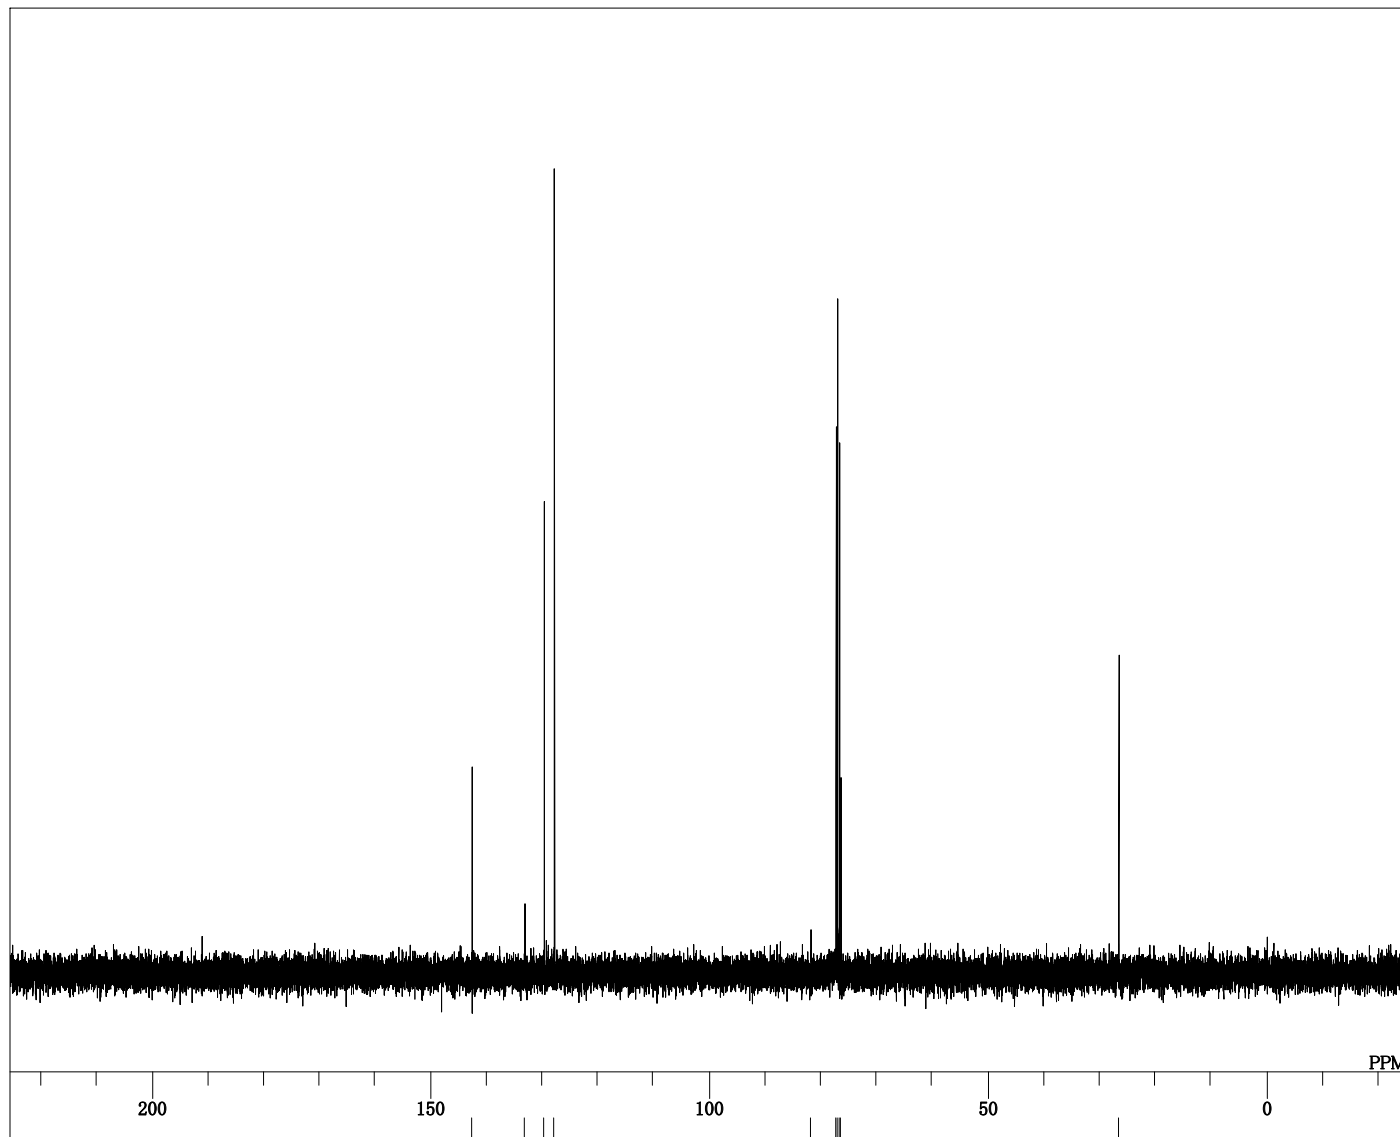

DFILE diol\_pClpClMeMe\_Carbon.als  
 COMNT single pulse decoupled gated NOE  
 DATIM 2020-11-22 00:44:47  
 OBNUC 13C  
 EXMOD carbon.jxp  
 OBFRQ 99.55 MHz  
 OBSET 5.13 KHz  
 OBFIN 0.98 Hz  
 POINT 32767  
 FREQU 31250.00 Hz  
 SCANS 44  
 ACQTM 1.0486 sec  
 PD 2.0000 sec  
 PW1 3.59 usec  
 IRNUC 1H  
 CTEMP 19.8 c  
 SLVNT CDCL3  
 EXREF 77.00 ppm  
 BF 0.12 Hz  
 RGAIN 50

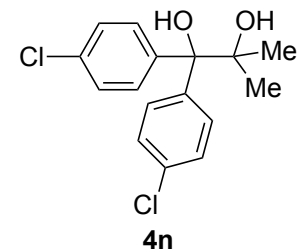

142.606

133.169

129.701

127.843

81.848

77.316

77.000

76.674

76.387

26.569

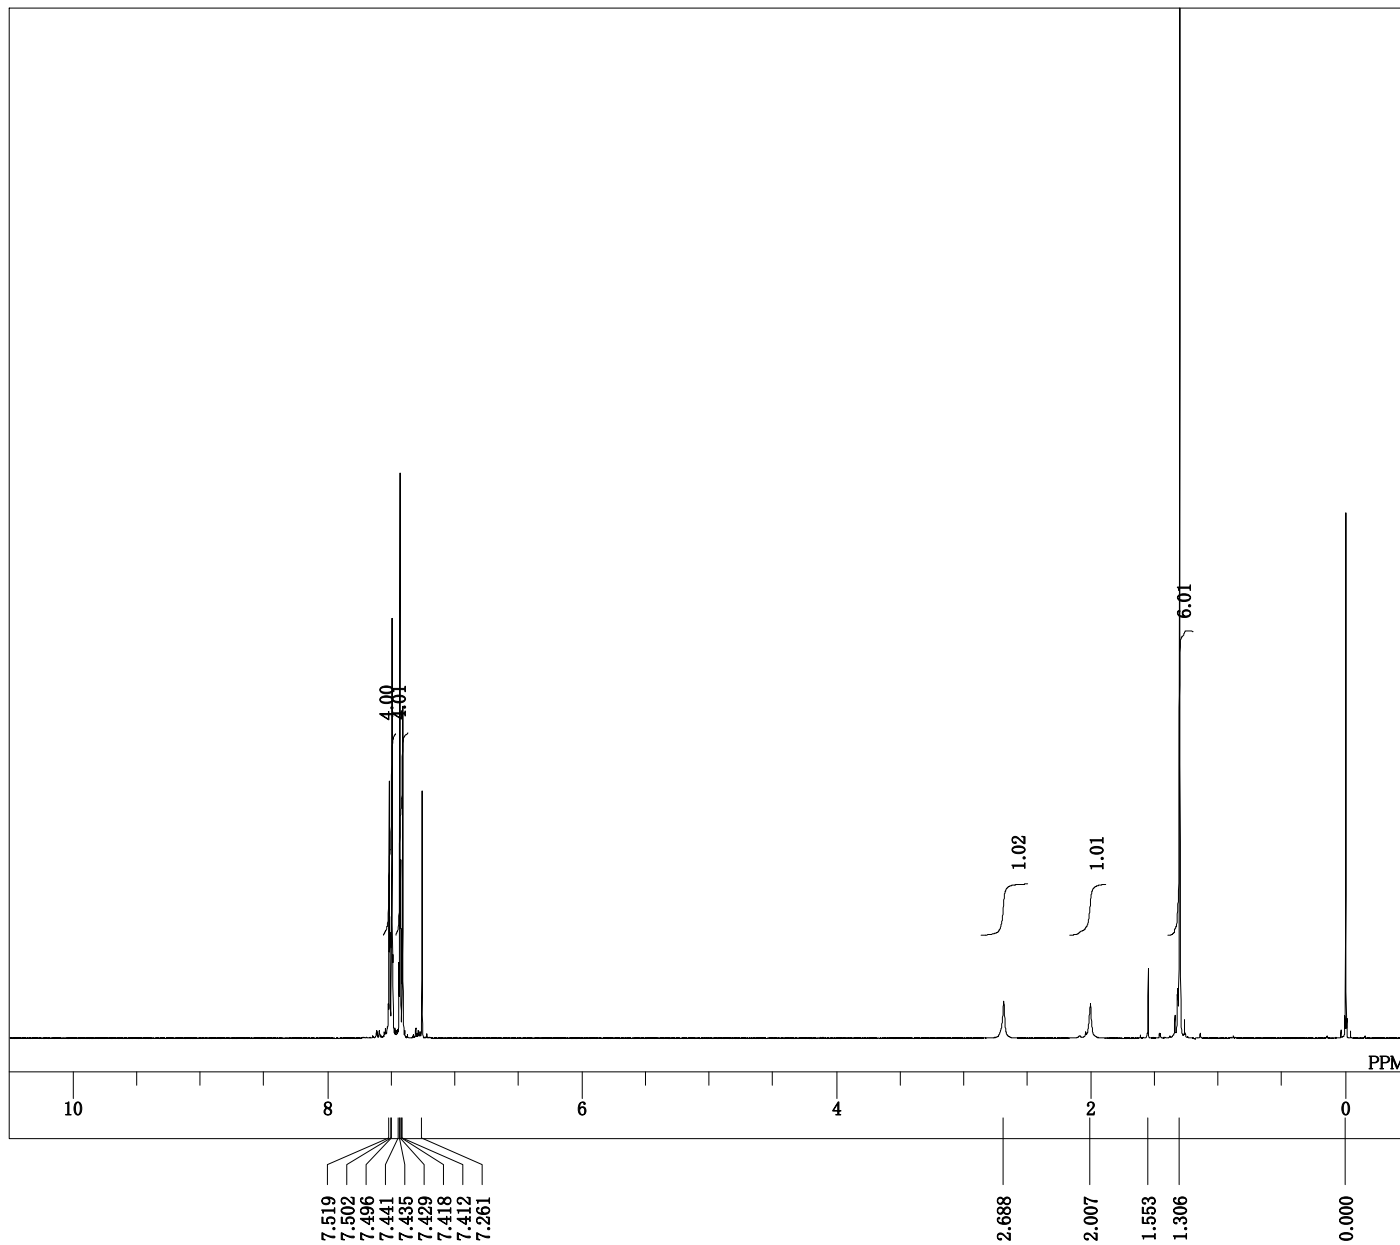

DFILE diol\_pBrpBr\_MeMe\_Proton.als  
 COMNT single\_pulse  
 DATIM 2020-12-02 09:02:55  
 OBNUC 1H  
 EXMOD proton.jxp  
 OBFRQ 395.88 MHz  
 OBSET 6.28 KHz  
 OBFIN 0.87 Hz  
 POINT 16384  
 FREQU 7422.80 Hz  
 SCANS 8  
 ACQTM 2.2073 sec  
 PD 5.0000 sec  
 PW1 3.14 usec  
 IRNUC 1H  
 CTEMP 18.5 c  
 SLVNT CDCL3  
 EXREF 0.00 ppm  
 BF 0.12 Hz  
 RGAIN 40

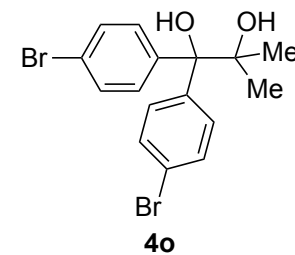

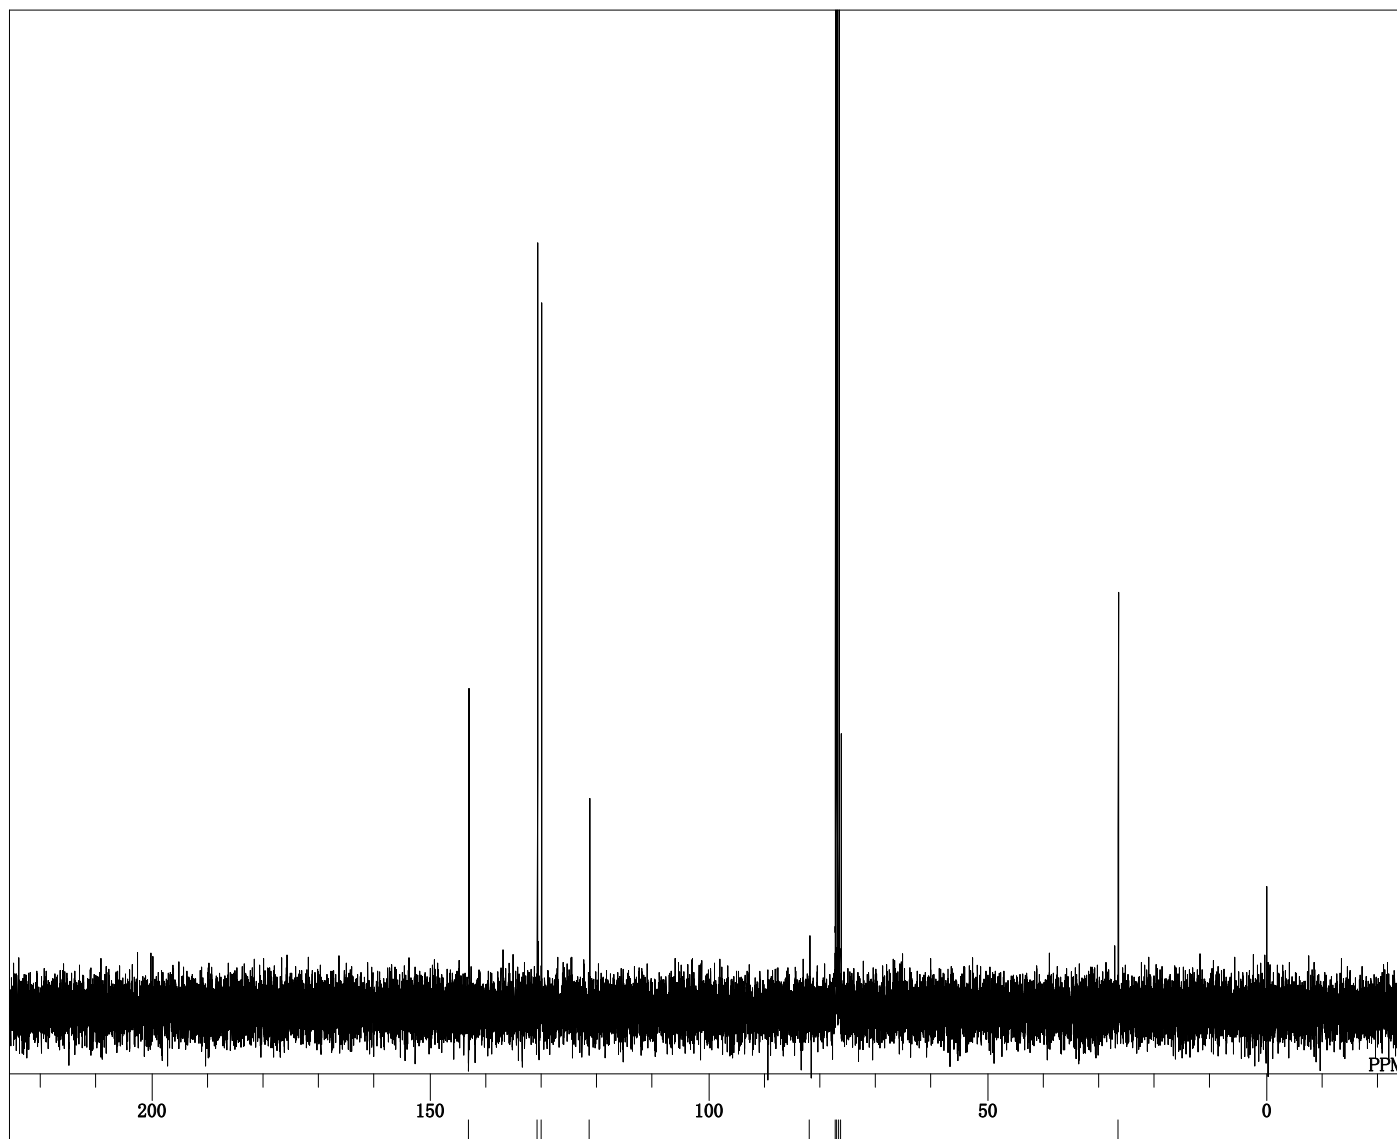

DFILE diol\_pBrpBr\_MeMe\_Carbon.als  
 COMNT single pulse decoupled gated NOE  
 DATIM 2020-12-02 09:04:07  
 OBNUC 13C  
 EXMOD carbon.jxp  
 OBFRQ 99.55 MHz  
 OBSET 5.13 KHz  
 OBFIN 0.98 Hz  
 POINT 32767  
 FREQU 31250.00 Hz  
 SCANS 256  
 ACQTM 1.0486 sec  
 PD 2.0000 sec  
 PW1 3.59 usec  
 IRNUC 1H  
 CTEMP 19.1 c  
 SLVNT CDCL3  
 EXREF 77.00 ppm  
 BF 0.12 Hz  
 RGAIN 50



143.066

130.832  
130.046

121.472

81.943  
77.326  
77.000  
76.684  
76.320

26.579

DFILE Ex834\_20220426\_Proton-1-1.als  
 COMNT single\_pulse  
 DATIM 2022-04-26 00:24:26  
 OBNUC 1H  
 EXMOD proton.jxp  
 OBFRQ 395.88 MHz  
 OBSET 6.28 KHz  
 OBFIN 0.87 Hz  
 POINT 16384  
 FREQU 7422.80 Hz  
 SCANS 8  
 ACQTM 2.2073 sec  
 PD 5.0000 sec  
 PW1 3.25 usec  
 IRNUC 1H  
 CTEMP 20.2 c  
 SLVNT CDCL3  
 EXREF 0.00 ppm  
 BF 0.12 Hz  
 RGAIN 22

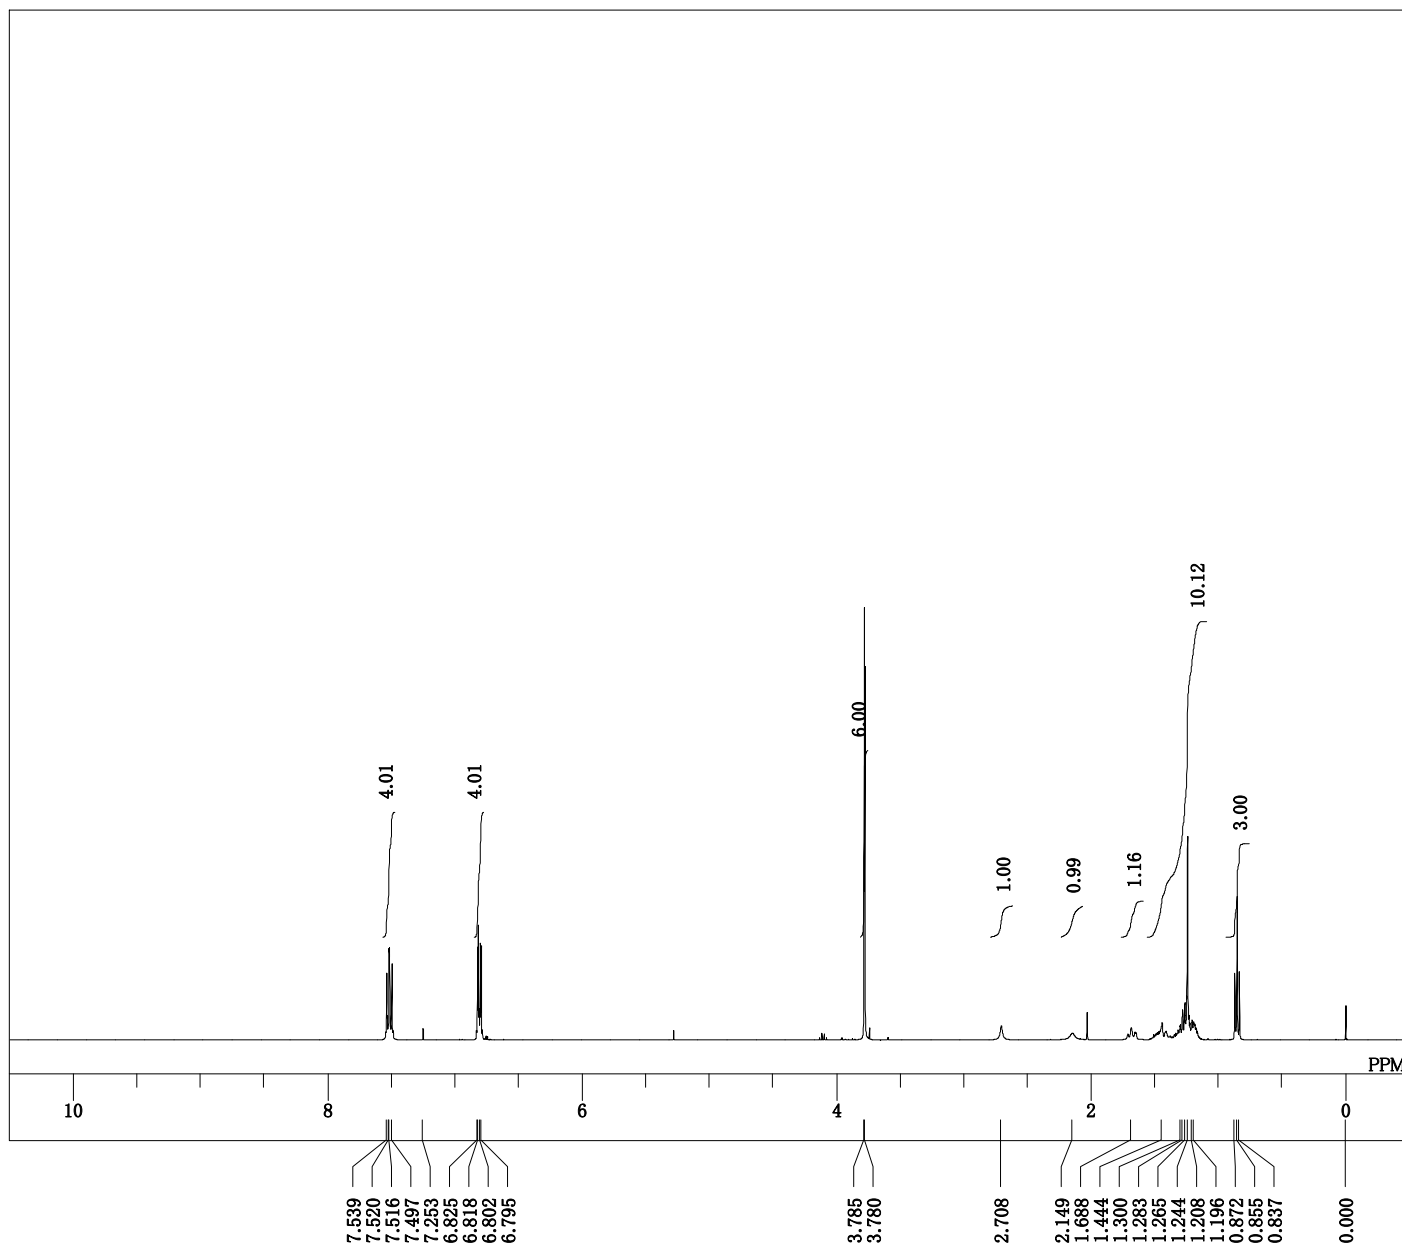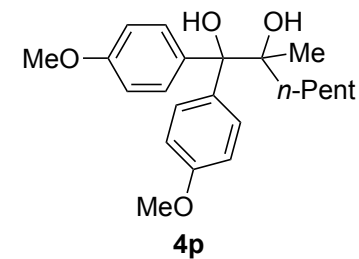

DFILE diol\_PMPPMPhMenPentyl\_Carbon.a  
 COMNT single pulse decoupled gated NOE  
 DATIM 2022-04-26 00:27:20  
 OBNUC 13C  
 EXMOD carbon.jxp  
 OBFRQ 99.55 MHz  
 OBSET 5.13 KHz  
 OBFIN 0.98 Hz  
 POINT 32767  
 FREQU 31250.00 Hz  
 SCANS 1024  
 ACQTM 1.0486 sec  
 PD 2.0000 sec  
 PW1 3.67 usec  
 IRNUC 1H  
 CTEMP 20.3 c  
 SLVNT CDCL3  
 EXREF 77.00 ppm  
 BF 0.12 Hz  
 RGAIN 50

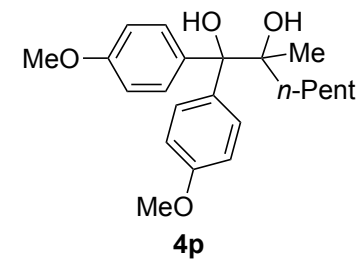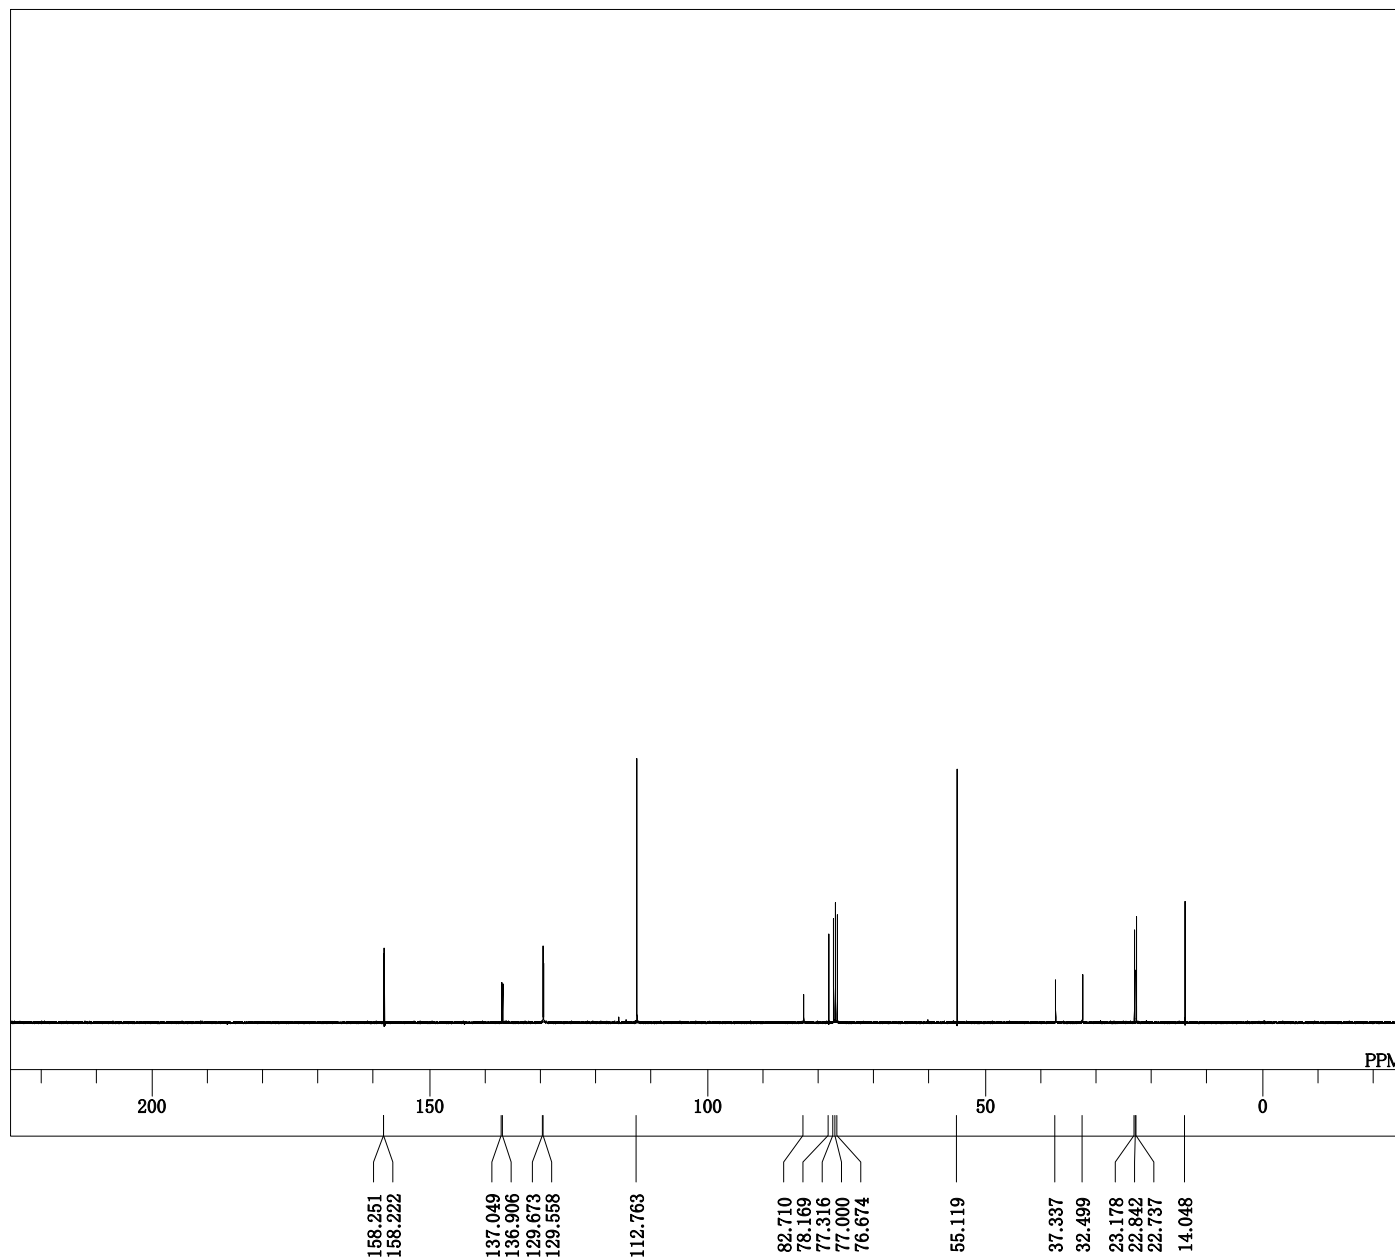

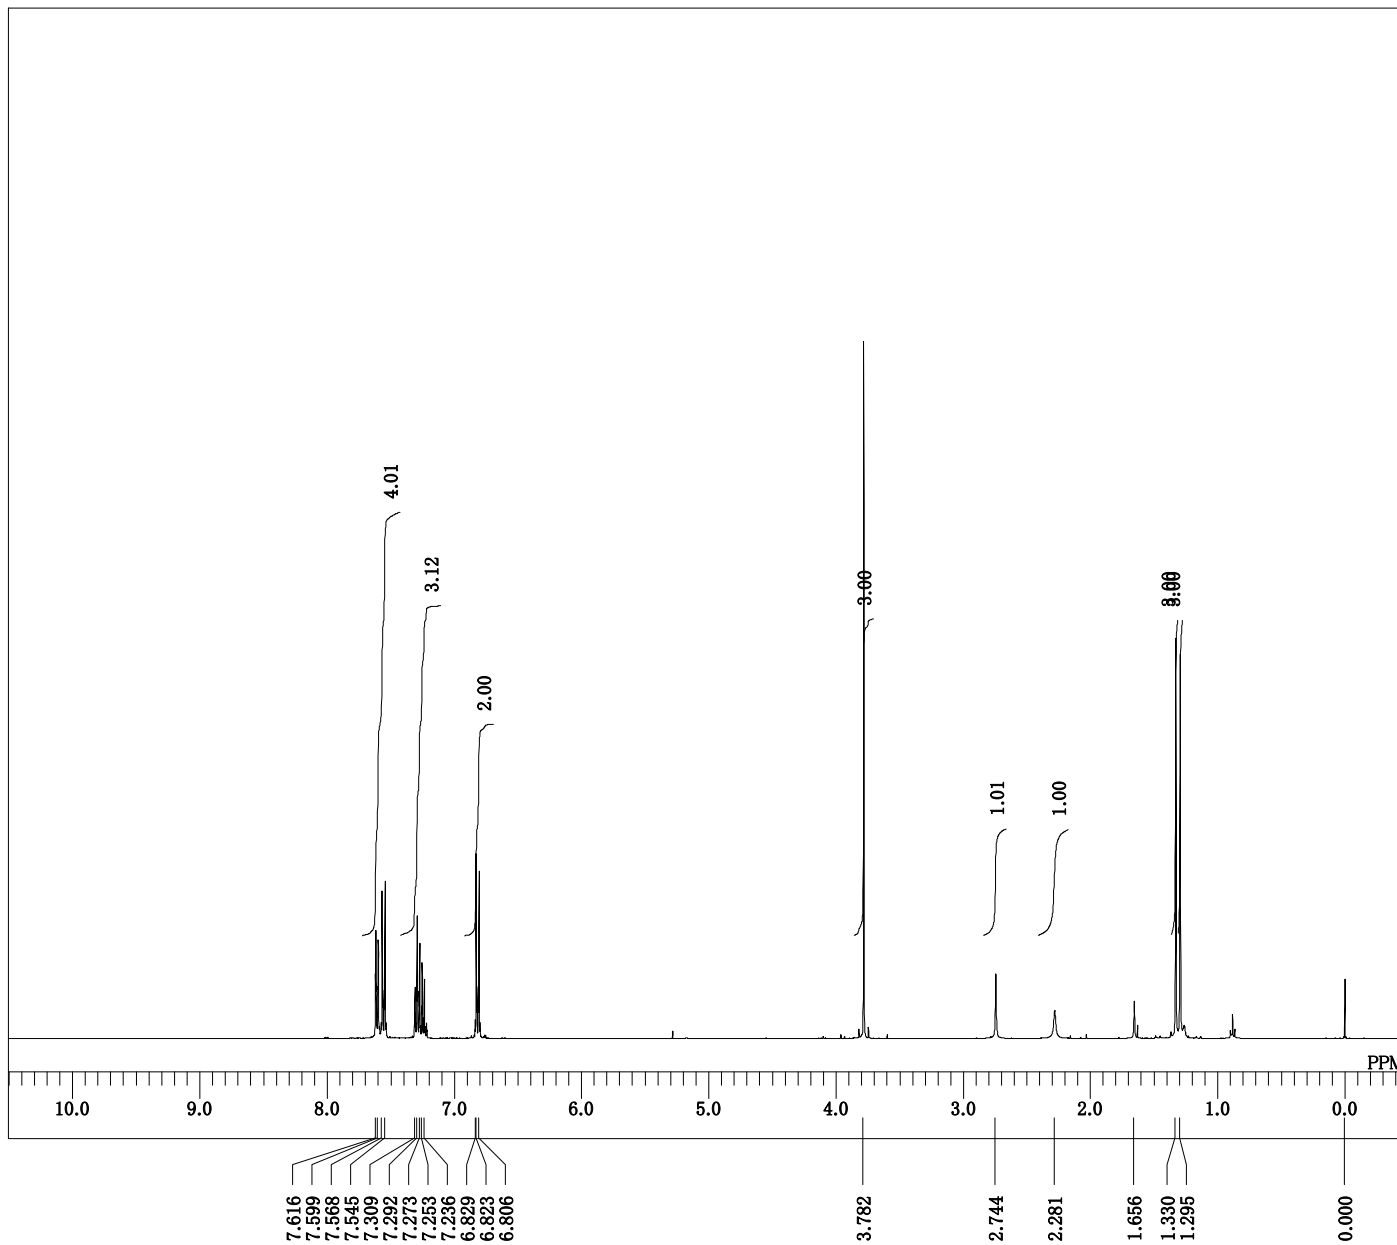

DFILE dio\_PhPMP\_MeMe\_Proton.als  
 COMNT single\_pulse  
 DATIM 2020-09-12 14:02:27  
 OBNUC 1H  
 EXMOD proton.jxp  
 OBFRQ 395.88 MHz  
 OBSET 6.28 KHz  
 OBFIN 0.87 Hz  
 POINT 13107  
 FREQU 5938.24 Hz  
 SCANS 8  
 ACQTM 2.2073 sec  
 PD 5.0000 sec  
 PW1 3.14 usec  
 IRNUC 1H  
 CTEMP 20.7 c  
 SLVNT CDCL3  
 EXREF 0.00 ppm  
 BF 0.12 Hz  
 RGAIN 26

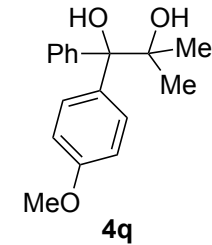



DFILE diol\_PhPMP\_MeMe\_Carbon.als  
 COMNT single pulse decoupled gated NOE  
 DATIM 2020-09-12 14:03:39  
 OBNUC <sup>13</sup>C  
 EXMOD carbon.jxp  
 OBFRQ 99.55 MHz  
 OBSET 5.13 KHz  
 OBFIN 0.98 Hz  
 POINT 26214  
 FREQU 25000.00 Hz  
 SCANS 508  
 ACQTM 1.0486 sec  
 PD 2.0000 sec  
 PW1 3.59 usec  
 IRNUC <sup>1</sup>H  
 CTEMP 20.3 c  
 SLVNT CDCL<sub>3</sub>  
 EXREF 77.00 ppm  
 BF 0.12 Hz  
 RGAIN 50

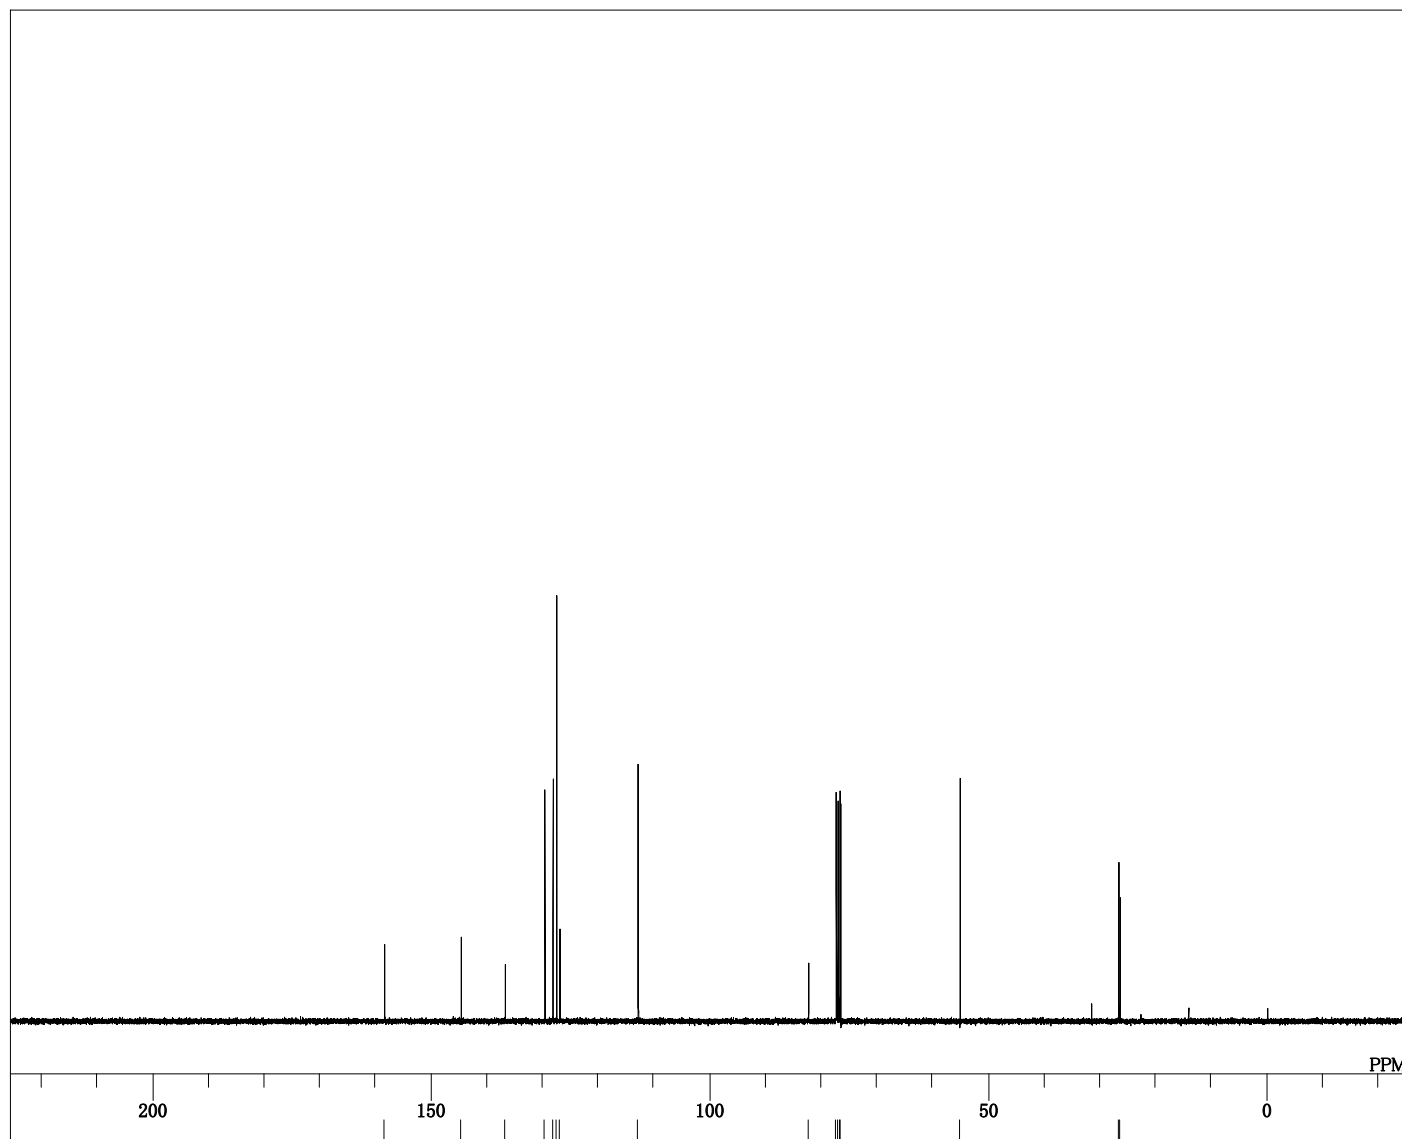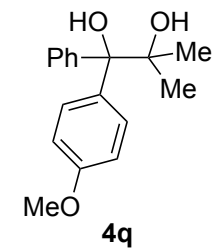

158.367  
 144.648  
 136.763  
 129.625  
 128.179  
 127.537  
 126.905  
 112.888  
 82.317  
 77.326  
 77.000  
 76.684  
 76.492  
 55.147  
 26.655  
 26.425

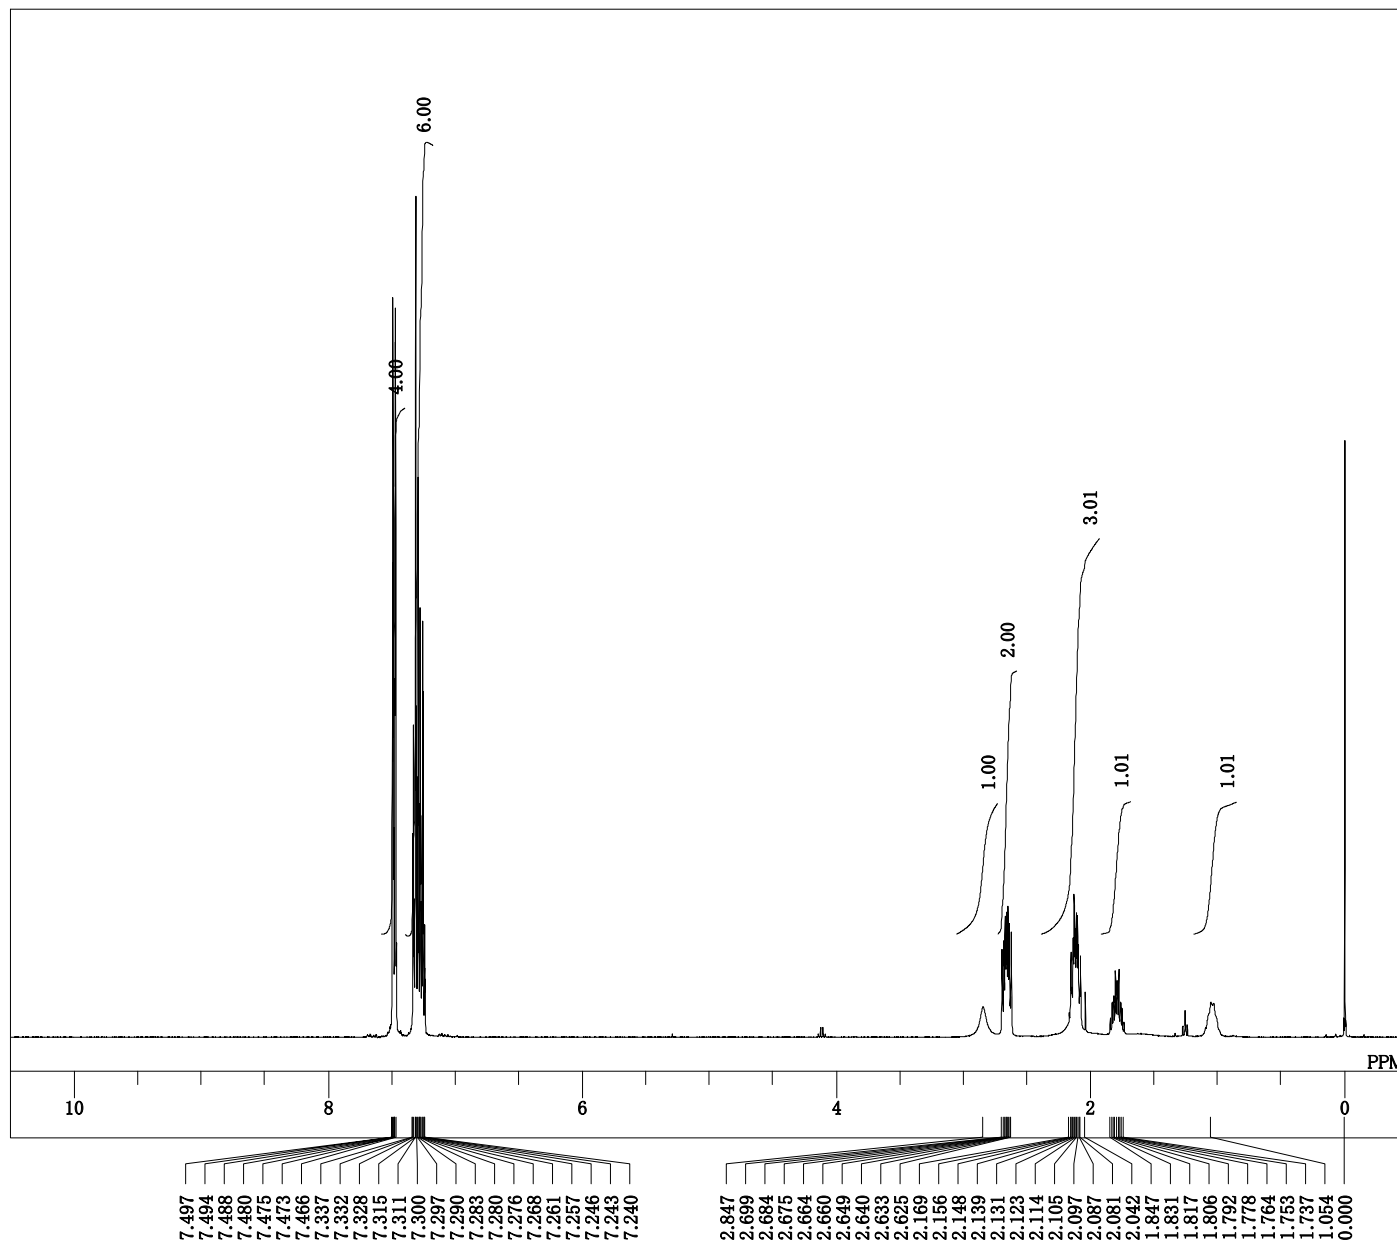

DFILE diol\_cyc.butylProton.als  
 COMNT single\_pulse  
 DATIM 2020-02-24 09:45:14  
 OBNUC 1H  
 EXMOD proton.jxp  
 OBFRQ 395.88 MHz  
 OBSET 6.28 KHz  
 OBFIN 0.87 Hz  
 POINT 13107  
 FREQU 5938.24 Hz  
 SCANS 8  
 ACQTM 2.2073 sec  
 PD 5.0000 sec  
 PW1 3.14 usec  
 IRNUC 1H  
 CTEMP 20.0 c  
 SLVNT CDCL3  
 EXREF 0.00 ppm  
 BF 0.12 Hz  
 RGAIN 36

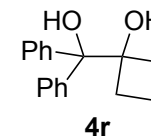

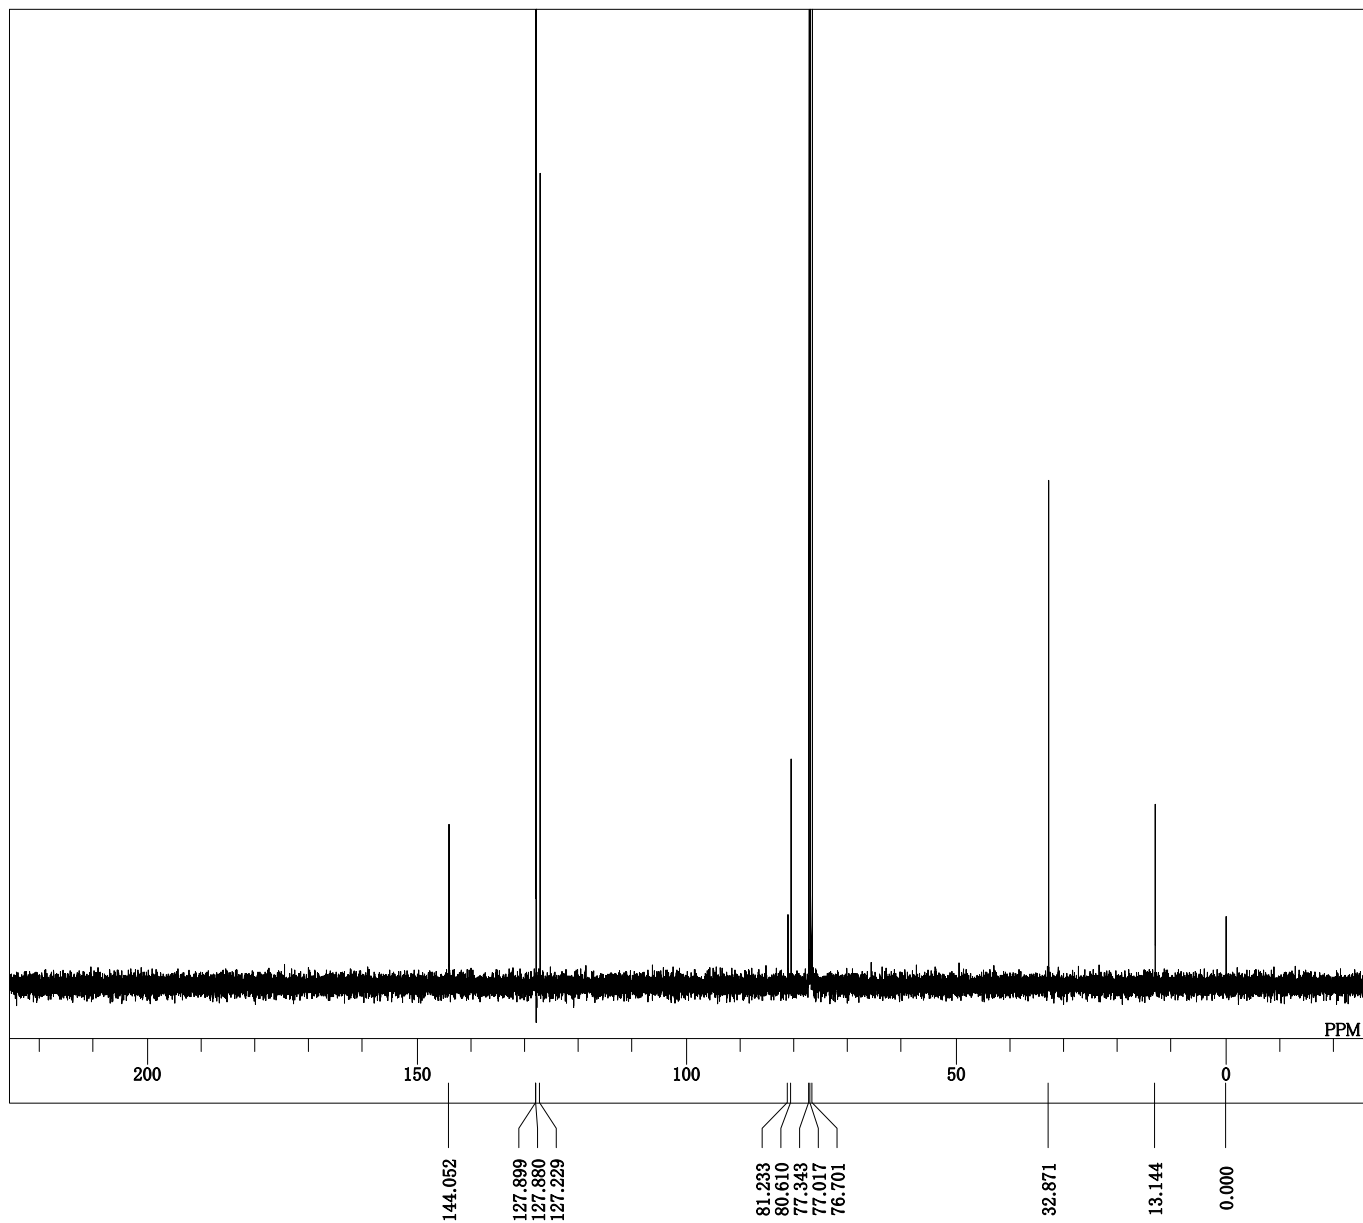

DFILE diol\_cyc.butyl\_Carbon.als  
 COMNT single pulse decoupled gated NOE  
 DATIM 2020-02-24 09:46:26  
 OBNUC 13C  
 EXMOD carbon.jxp  
 OBFRQ 99.55 MHz  
 OBSET 5.13 KHz  
 OBFIN 0.98 Hz  
 POINT 26214  
 FREQU 25000.00 Hz  
 SCANS 1024  
 ACQTM 1.0486 sec  
 PD 2.0000 sec  
 PW1 3.59 usec  
 IRNUC 1H  
 CTEMP 20.0 c  
 SLVNT CDCL3  
 EXREF 0.00 ppm  
 BF 0.12 Hz  
 RGAIN 50

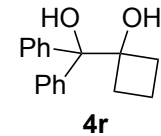

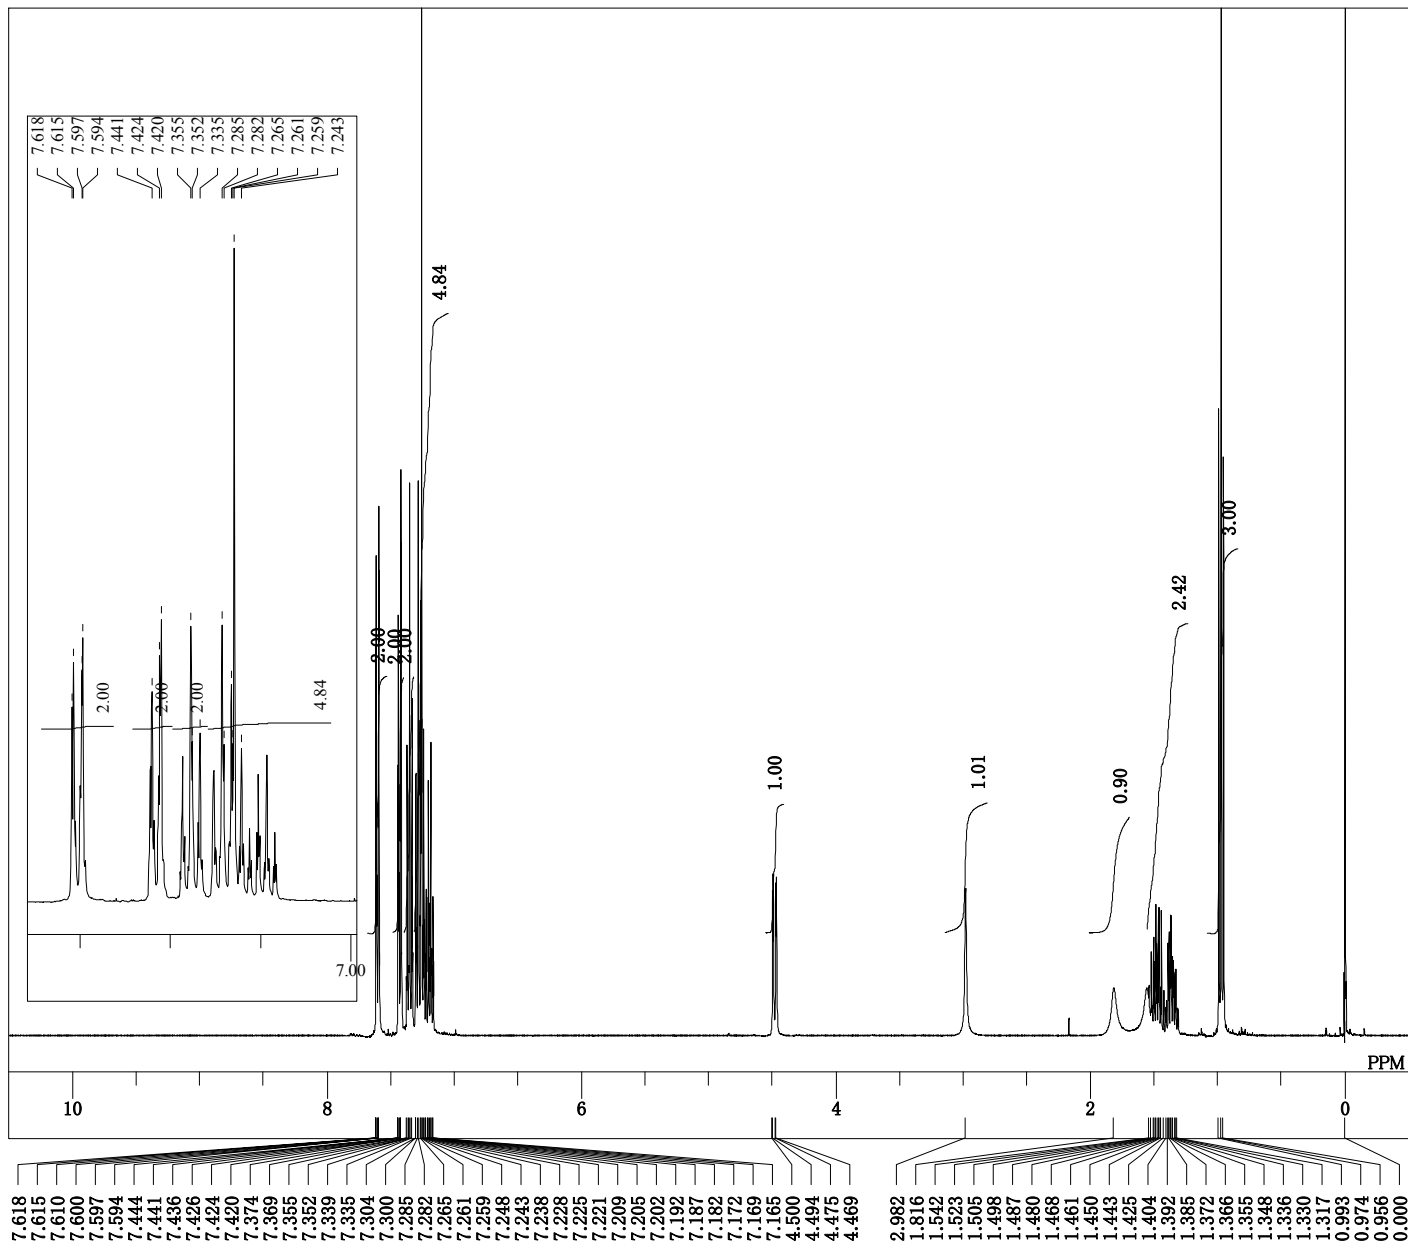

DFILE diol\_H\_Et\_Proton.als  
 COMNT single\_pulse  
 DATIM 2020-02-24 10:44:39  
 OBNUC 1H  
 EXMOD proton.jxp  
 OBFRQ 395.88 MHz  
 OBSET 6.28 KHz  
 OBFIN 0.87 Hz  
 POINT 13107  
 FREQU 5938.24 Hz  
 SCANS 8  
 ACQTM 2.2073 sec  
 PD 5.0000 sec  
 PW1 3.14 usec  
 IRNUC 1H  
 CTEMP 19.8 c  
 SLVNT CDCL3  
 EXREF 0.00 ppm  
 BF 0.12 Hz  
 RGAIN 40

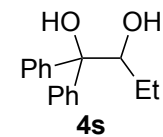

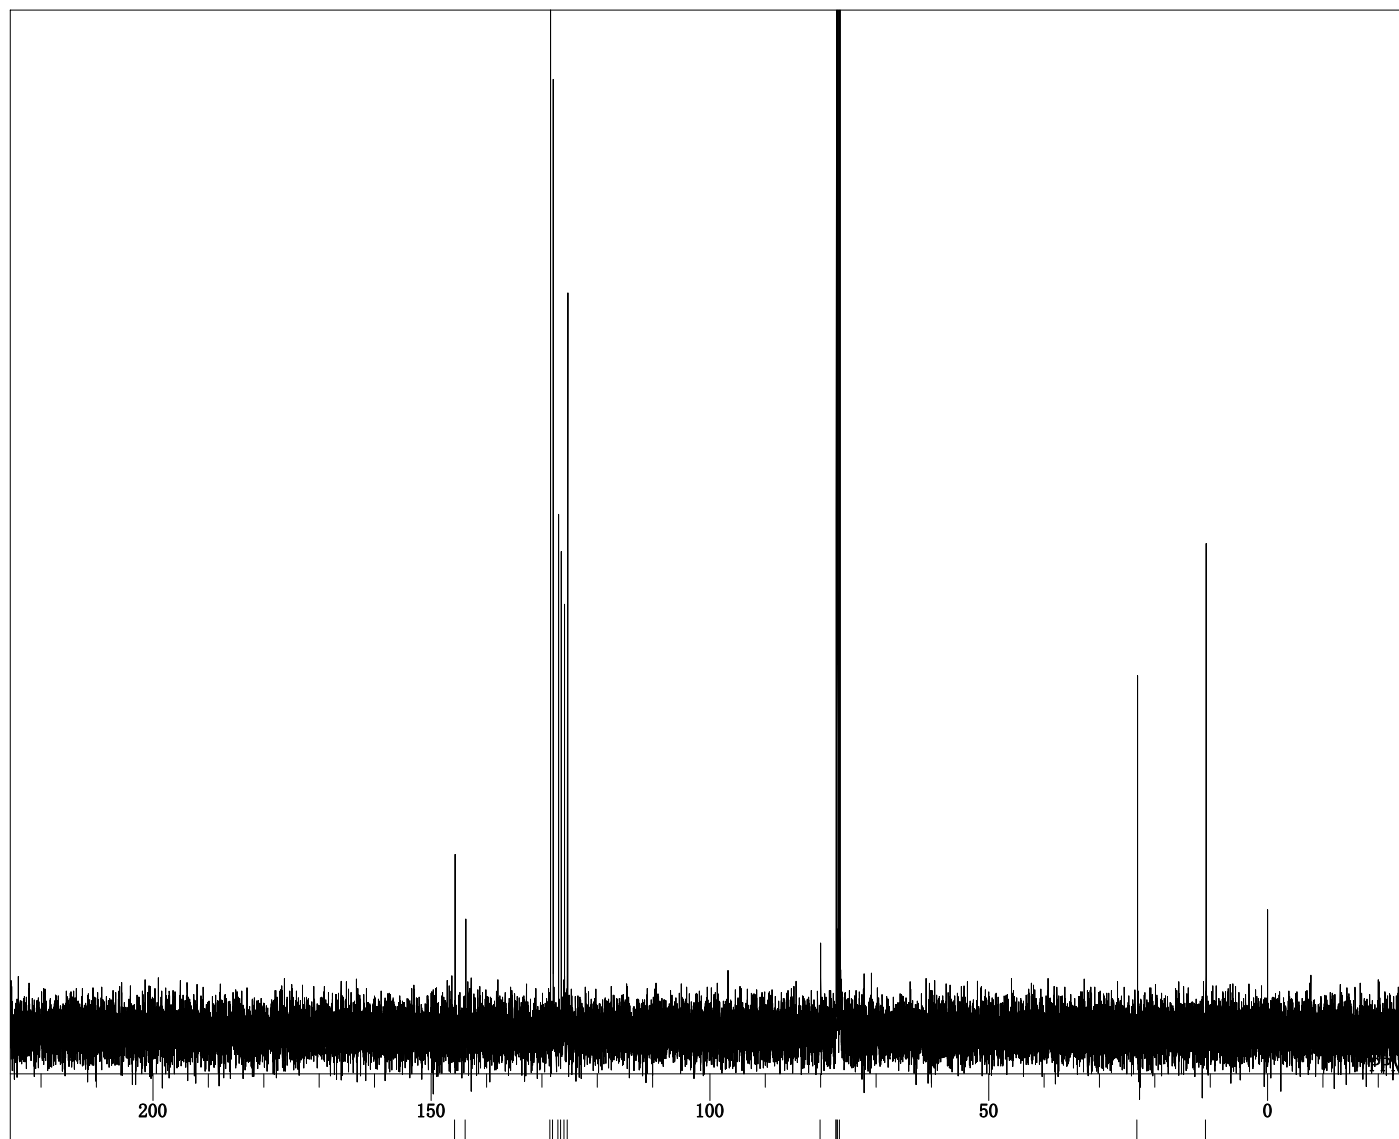

145.788  
143.814  
128.629  
128.160  
127.202  
126.732  
126.138  
125.573

80.104  
77.326  
77.287  
77.000  
76.684

23.302  
11.010

DFILE dioLH\_Et\_Carbon.als  
 COMNT single pulse decoupled gated NOE  
 DATIM 2020-02-24 10:45:51  
 OBNUC 13C  
 EXMOD carbon.jxp  
 OBFRQ 99.55 MHz  
 OBSET 5.13 KHz  
 OBFIN 0.98 Hz  
 POINT 26214  
 FREQU 25000.00 Hz  
 SCANS 1024  
 ACQTM 1.0486 sec  
 PD 2.0000 sec  
 PW1 3.59 usec  
 IRNUC 1H  
 CTEMP 19.4 c  
 SLVNT CDCL3  
 EXREF 77.00 ppm  
 BF 0.12 Hz  
 RGAIN 50

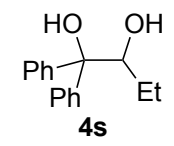

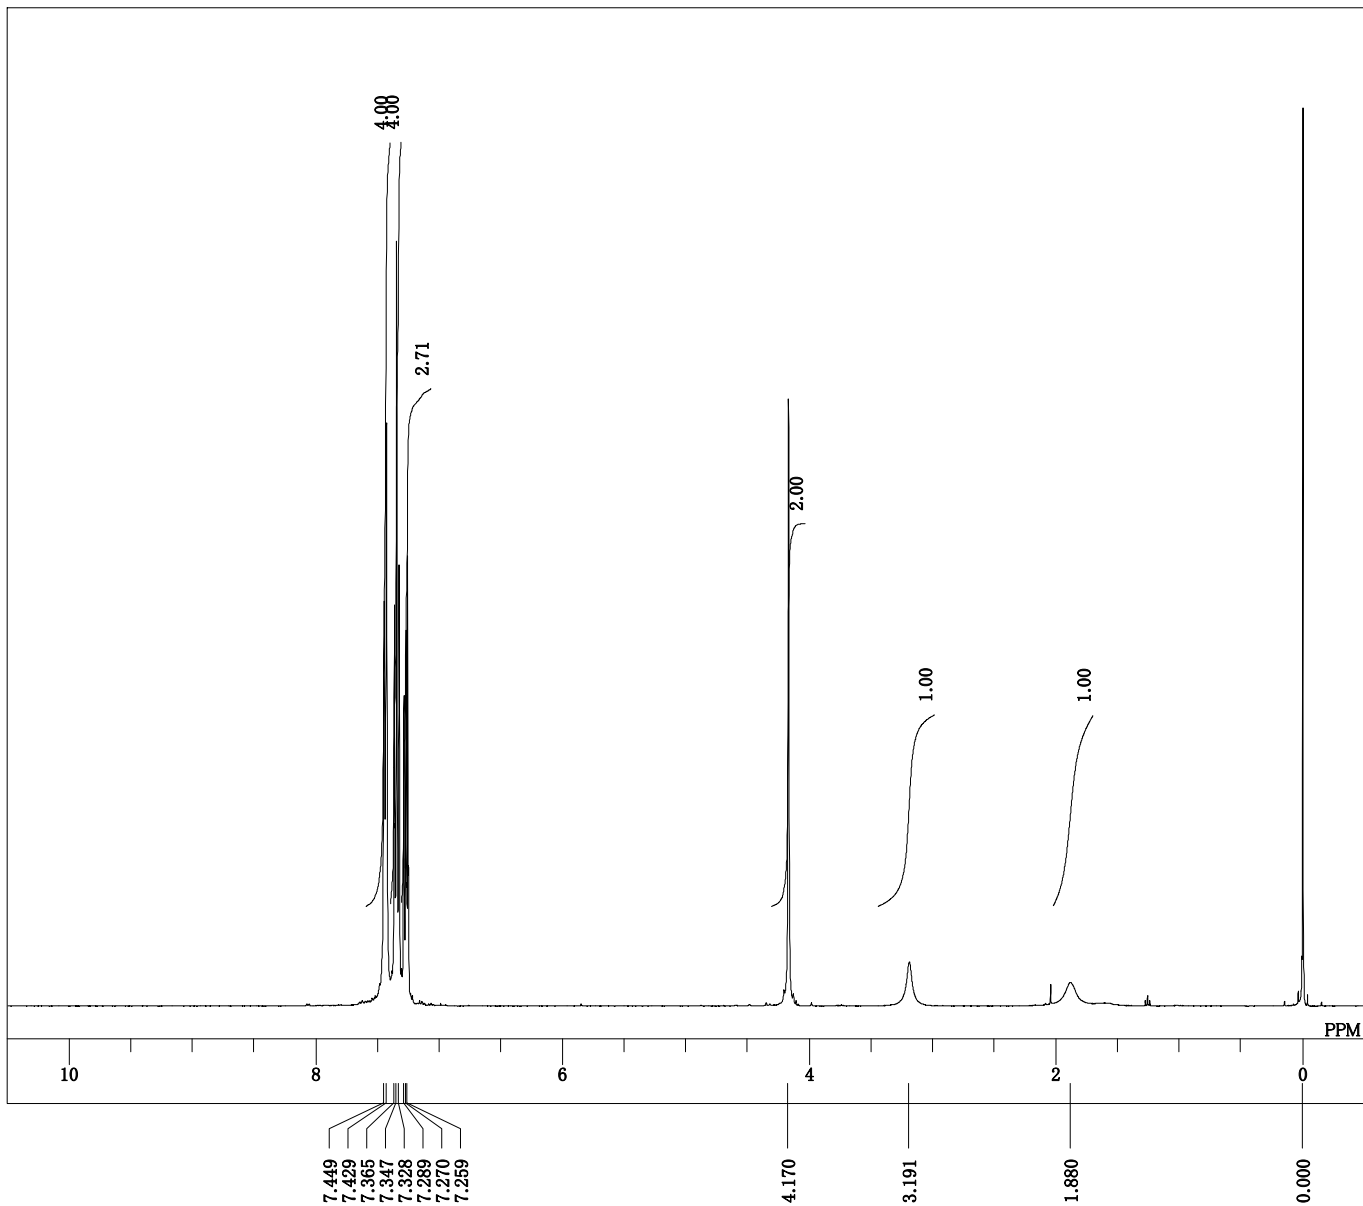

DFILE dio\_L\_H\_Proton.als  
 COMNT single\_pulse  
 DATIM 2020-12-22 23:59:11  
 OBNUC 1H  
 EXMOD proton\_jxp  
 OBFRQ 395.88 MHz  
 OBSET 6.28 KHz  
 OBFIN 0.87 Hz  
 POINT 16384  
 FREQU 7422.80 Hz  
 SCANS 8  
 ACQTM 2.2073 sec  
 PD 5.0000 sec  
 PW1 3.14 usec  
 IRNUC 1H  
 CTEMP 18.4 c  
 SLVNT CDCL3  
 EXREF 0.00 ppm  
 BF 0.72 Hz  
 RGAIN 40

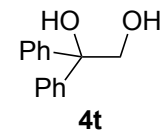

DFILE diol\_H,H\_Carbon.als  
COMNT single pulse decoupled gated NOE  
DATIM 2020-12-21 18:44:31  
OBNUC 13C  
EXMOD carbon.jxp  
OBFRQ 99.55 MHz  
OBSET 5.13 KHz  
OBFIN 0.98 Hz  
POINT 32767  
FREQU 31250.00 Hz  
SCANS 84  
ACQTM 1.0486 sec  
PD 2.0000 sec  
PW1 3.59 usec  
IRNUC 1H  
CTEMP 19.3 c  
SLVNT CDCL3  
EXREF 77.00 ppm  
BF 0.72 Hz  
RGAIN 50

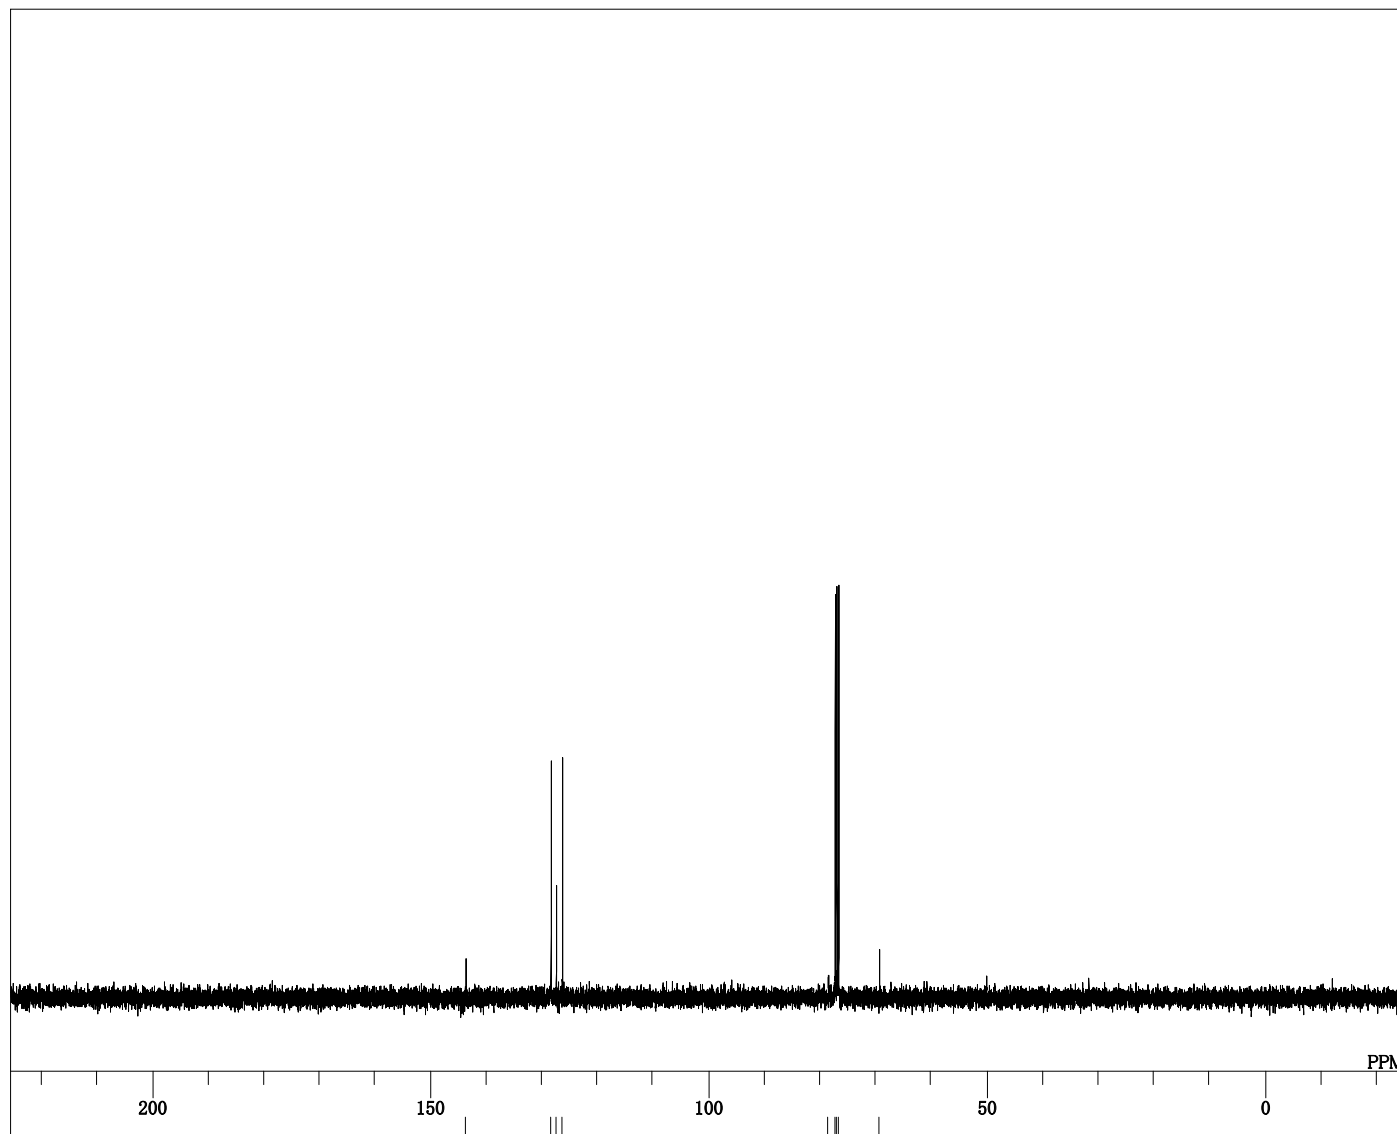

143.727

128.418  
127.460  
126.367

78.533  
77.326  
77.000  
76.684  
69.364

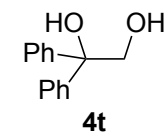

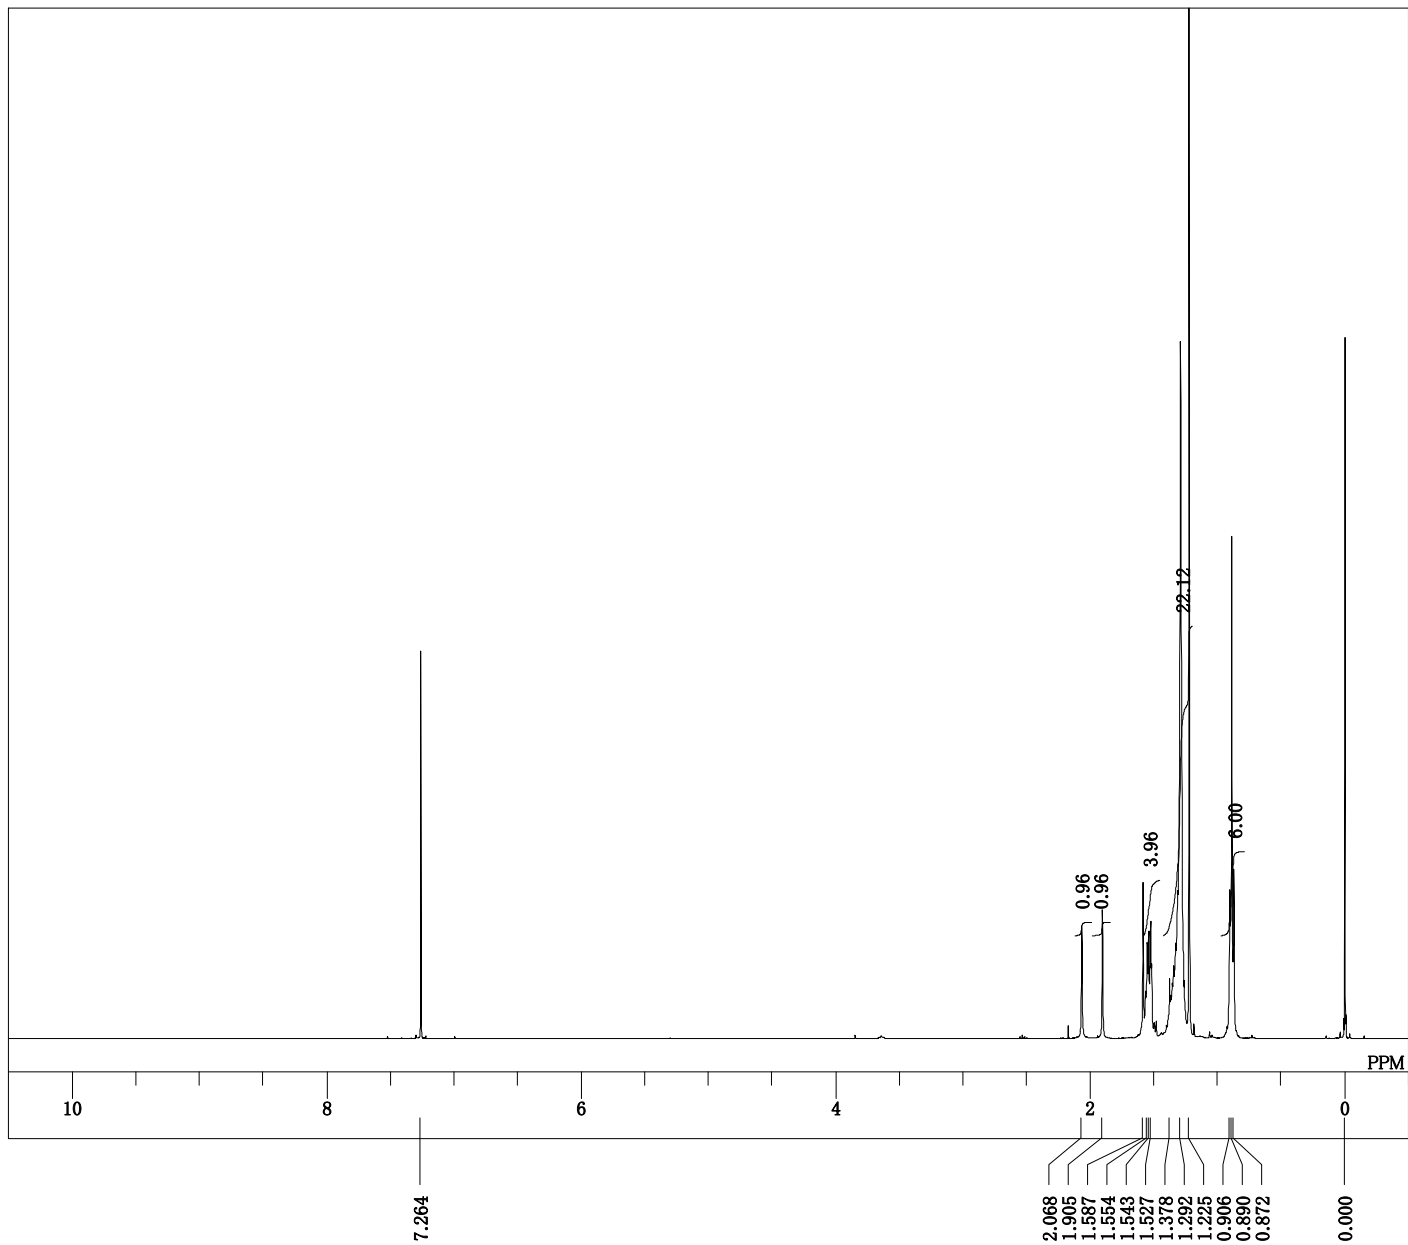

DFILE diol\_Me\_Me\_nHex\_nHex\_Proton.als  
 COMNT single\_pulse  
 DATIM 2020-07-14 14:39:12  
 OBNUC 1H  
 EXMOD proton.jxp  
 OBFRQ 395.88 MHz  
 OBSET 6.28 KHz  
 OBFIN 0.87 Hz  
 POINT 13107  
 FREQU 5938.24 Hz  
 SCANS 8  
 ACQTM 2.2073 sec  
 PD 5.0000 sec  
 PW1 3.14 usec  
 IRNUC 1H  
 CTEMP 20.7 c  
 SLVNT CDCL3  
 EXREF 0.00 ppm  
 BF 0.12 Hz  
 RGAIN 34

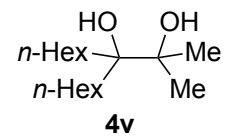



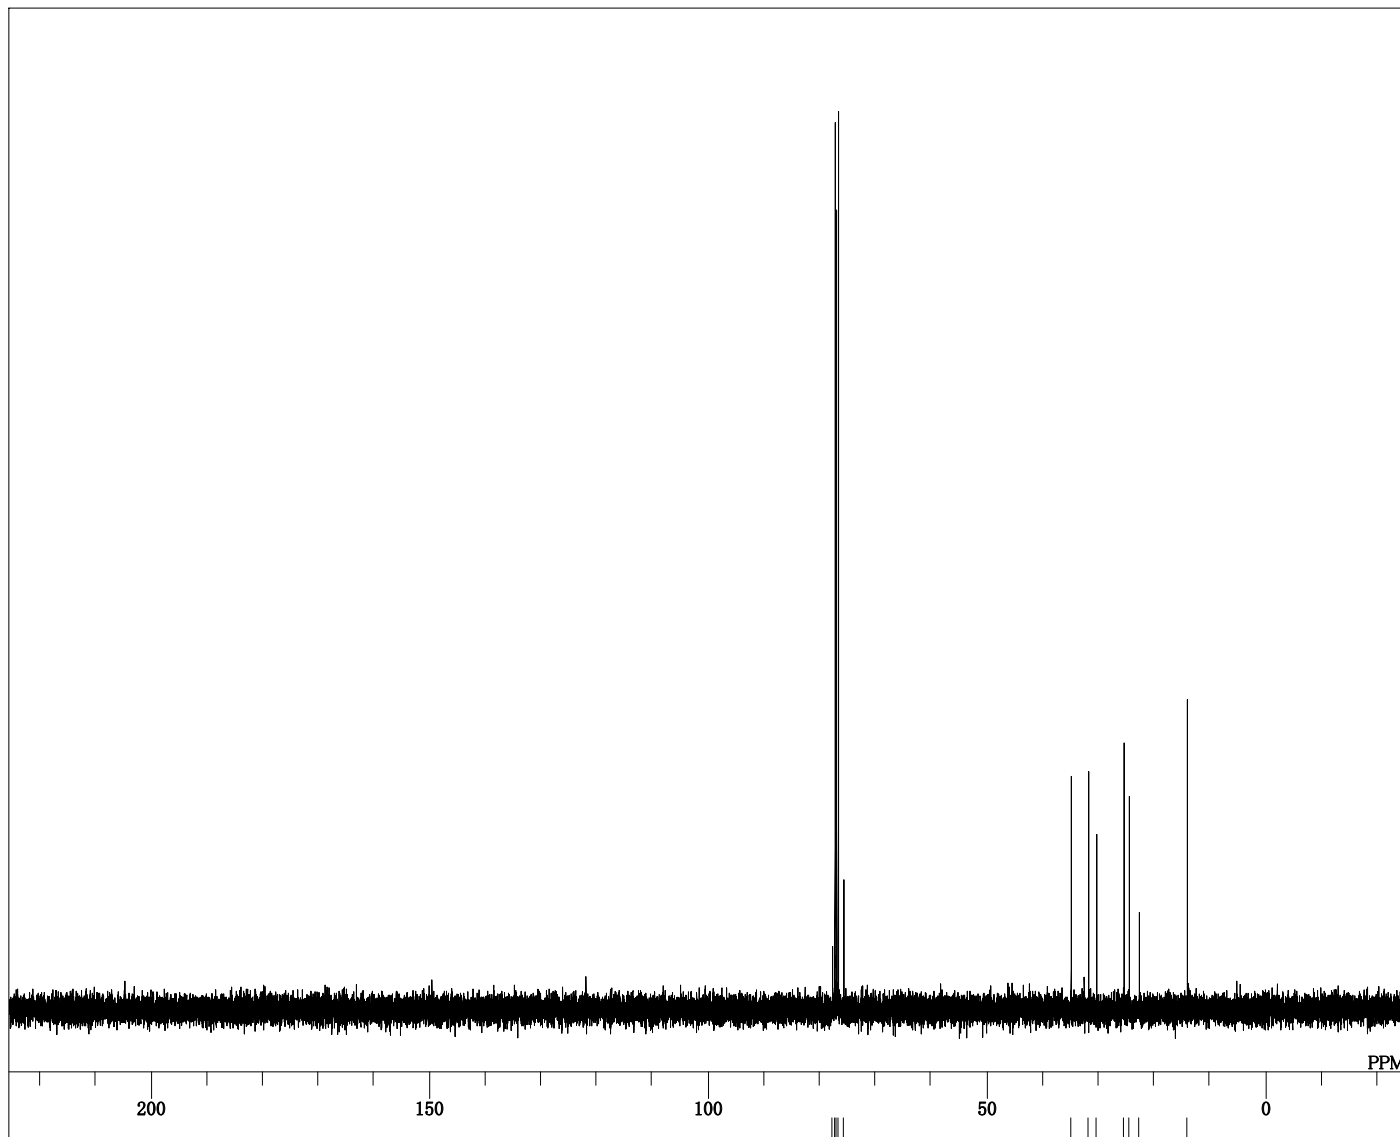

DFILE diol\_Me\_Me\_nHex\_nHex\_Carbon.als  
 COMNT single pulse decoupled gated NOE  
 DATIM 2020-07-14 14:40:25  
 OBNUC 13C  
 EXMOD carbon.jxp  
 OBFRQ 99.55 MHz  
 OBSET 5.13 KHz  
 OBFIN 0.98 Hz  
 POINT 26214  
 FREQU 25000.00 Hz  
 SCANS 150  
 ACQTM 1.0486 sec  
 PD 2.0000 sec  
 PW1 3.59 usec  
 IRNUC 1H  
 CTEMP 20.5 c  
 SLVNT CDCL3  
 EXREF 77.00 ppm  
 BF 0.12 Hz  
 RGAIN 50



77.738  
 77.316  
 77.000  
 76.674  
 75.735  
 34.951  
 31.799  
 30.334  
 25.438  
 24.499  
 22.650  
 14.076

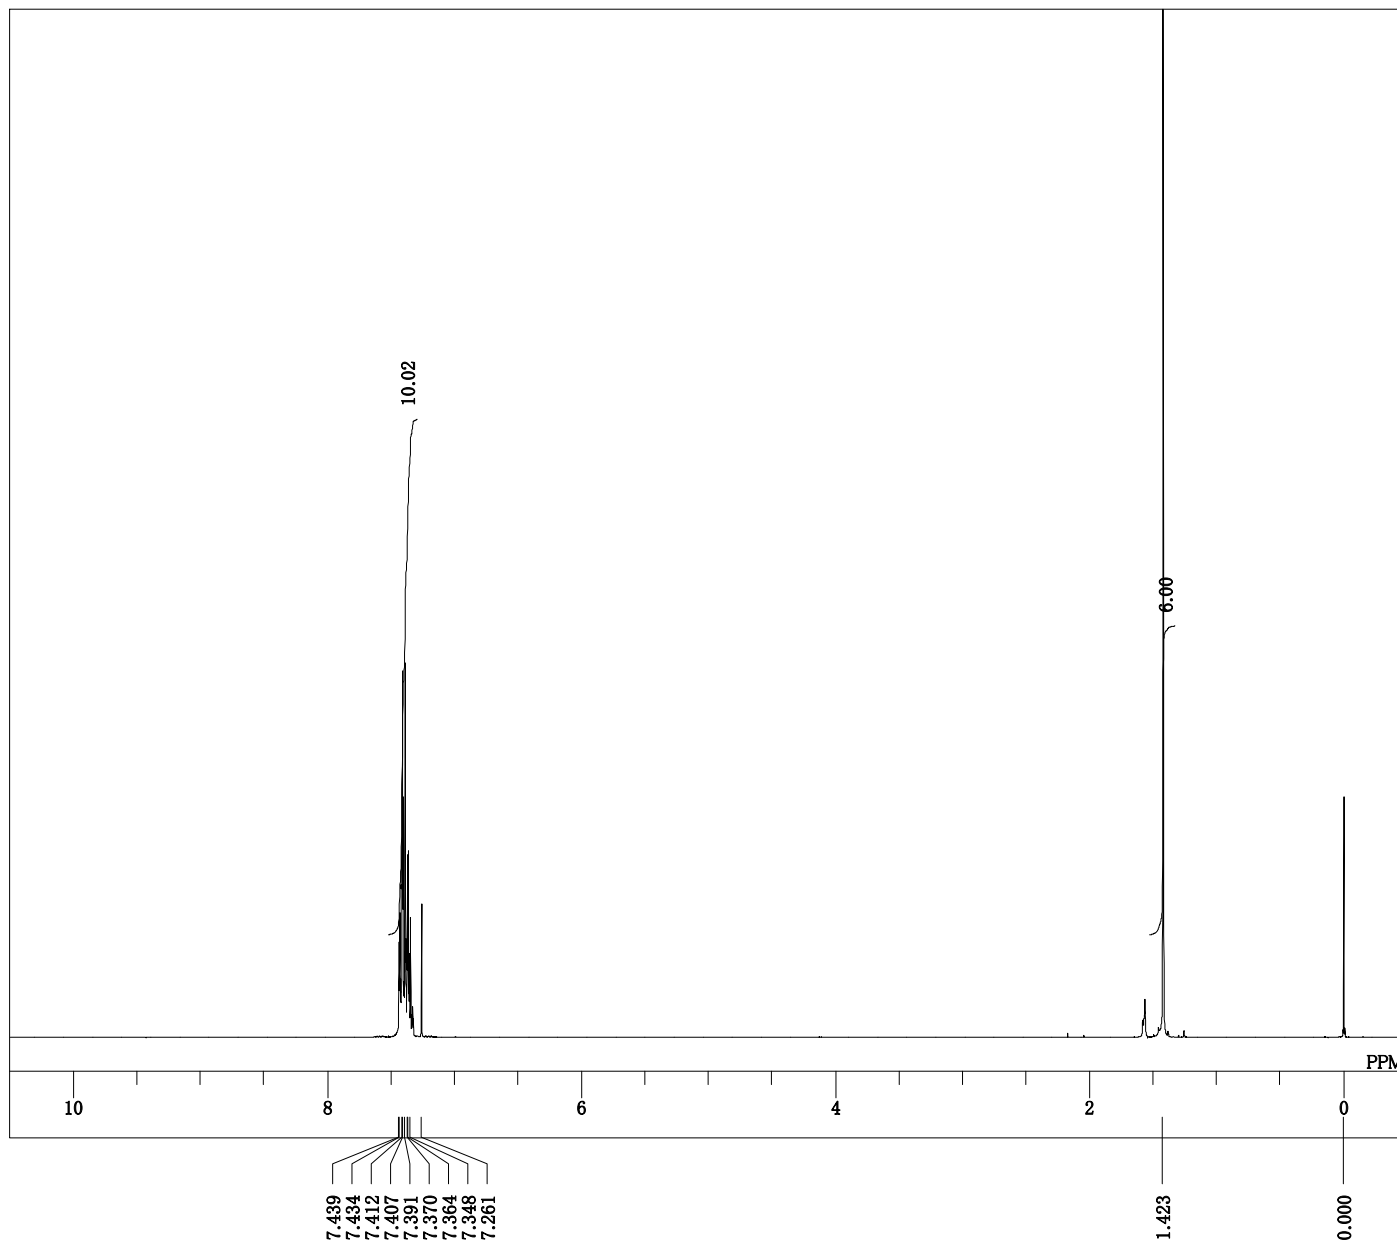

DFILE cyc\_Me\_Me\_Proton.als  
 COMNT single\_pulse  
 DATIM 2020-02-24 12:45:14  
 OBNUC 1H  
 EXMOD proton.jxp  
 OBFRQ 395.88 MHz  
 OBSET 6.28 KHz  
 OFFIN 0.87 Hz  
 POINT 13107  
 FREQU 5938.24 Hz  
 SCANS 8  
 ACQTM 2.2073 sec  
 PD 5.0000 sec  
 PW1 3.14 usec  
 IRNUC 1H  
 CTEMP 19.5 c  
 SLVNT CDCL3  
 EXREF 0.00 ppm  
 BF 0.12 Hz  
 RGAIN 38

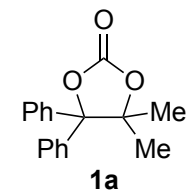

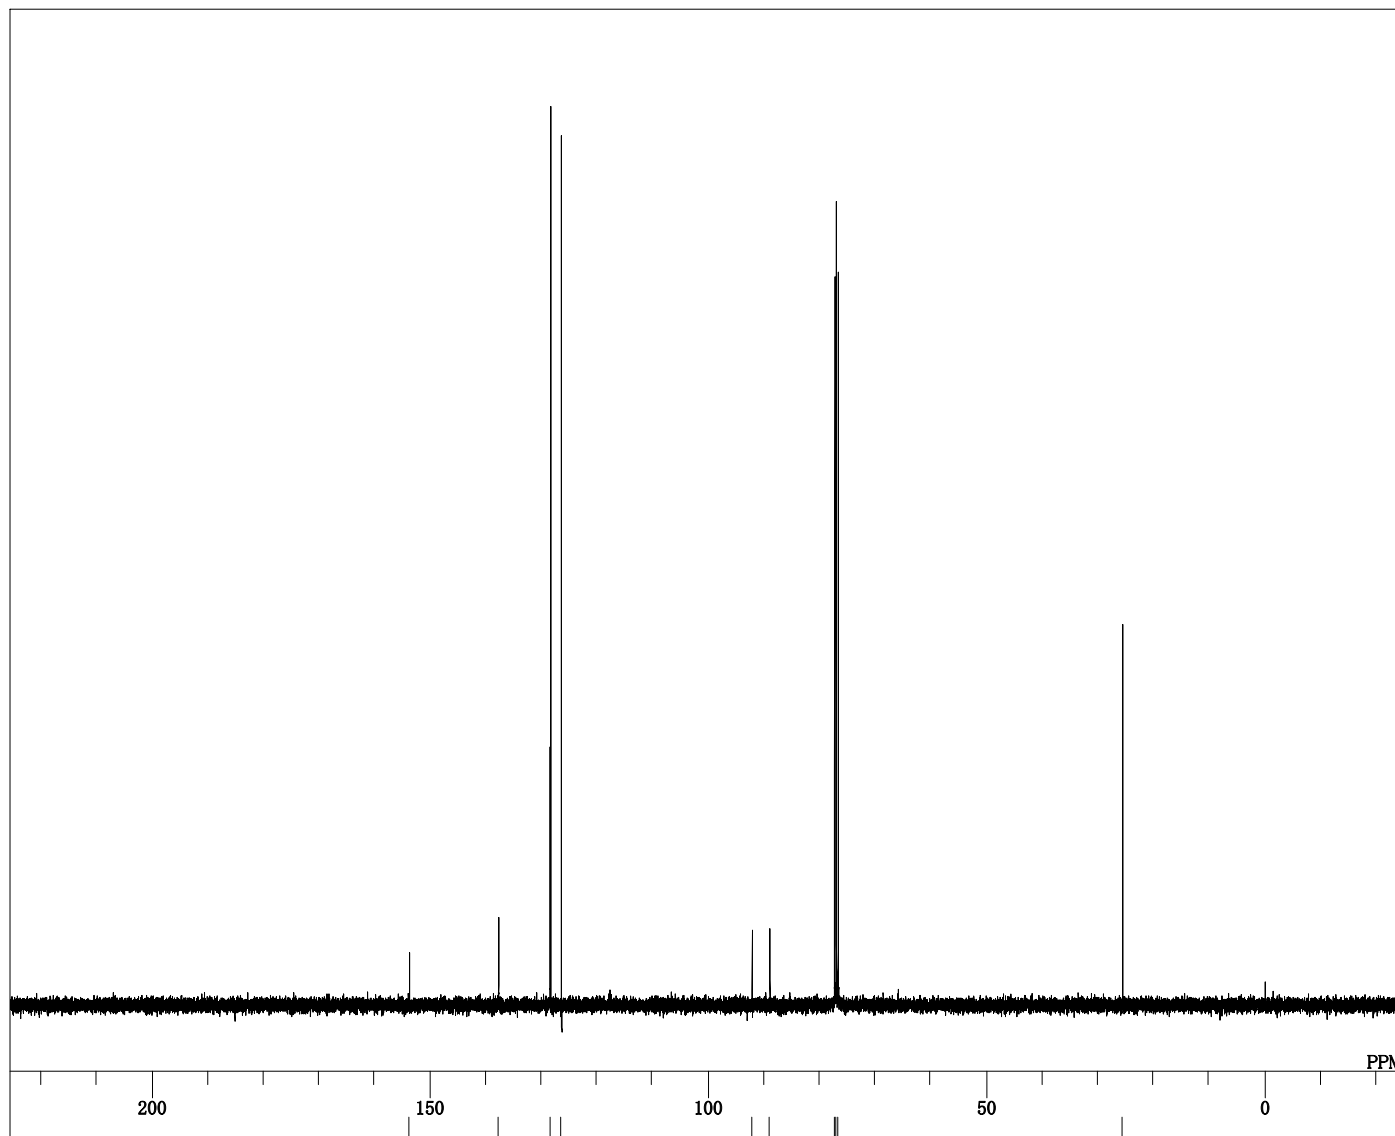

DFILE cyc\_Me\_Me\_Carbon.als  
 COMNT single pulse decoupled gated NOE  
 DATIM 2020-02-24 12:46:26  
 OBNUC 13C  
 EXMOD carbon.jxp  
 OBFRQ 99.55 MHz  
 OBSET 5.13 KHz  
 OBFIN 0.98 Hz  
 POINT 26214  
 FREQU 25000.00 Hz  
 SCANS 1024  
 ACQTM 1.0486 sec  
 PD 2.0000 sec  
 PW1 3.59 usec  
 IRNUC 1H  
 CTEMP 19.5 c  
 SLVNT CDCL3  
 EXREF 77.00 ppm  
 BF 0.12 Hz  
 RGAIN 50

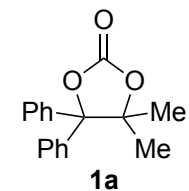

153.797

137.759

128.428  
126.416

92.166  
88.956

77.316  
77.000  
76.674

25.582

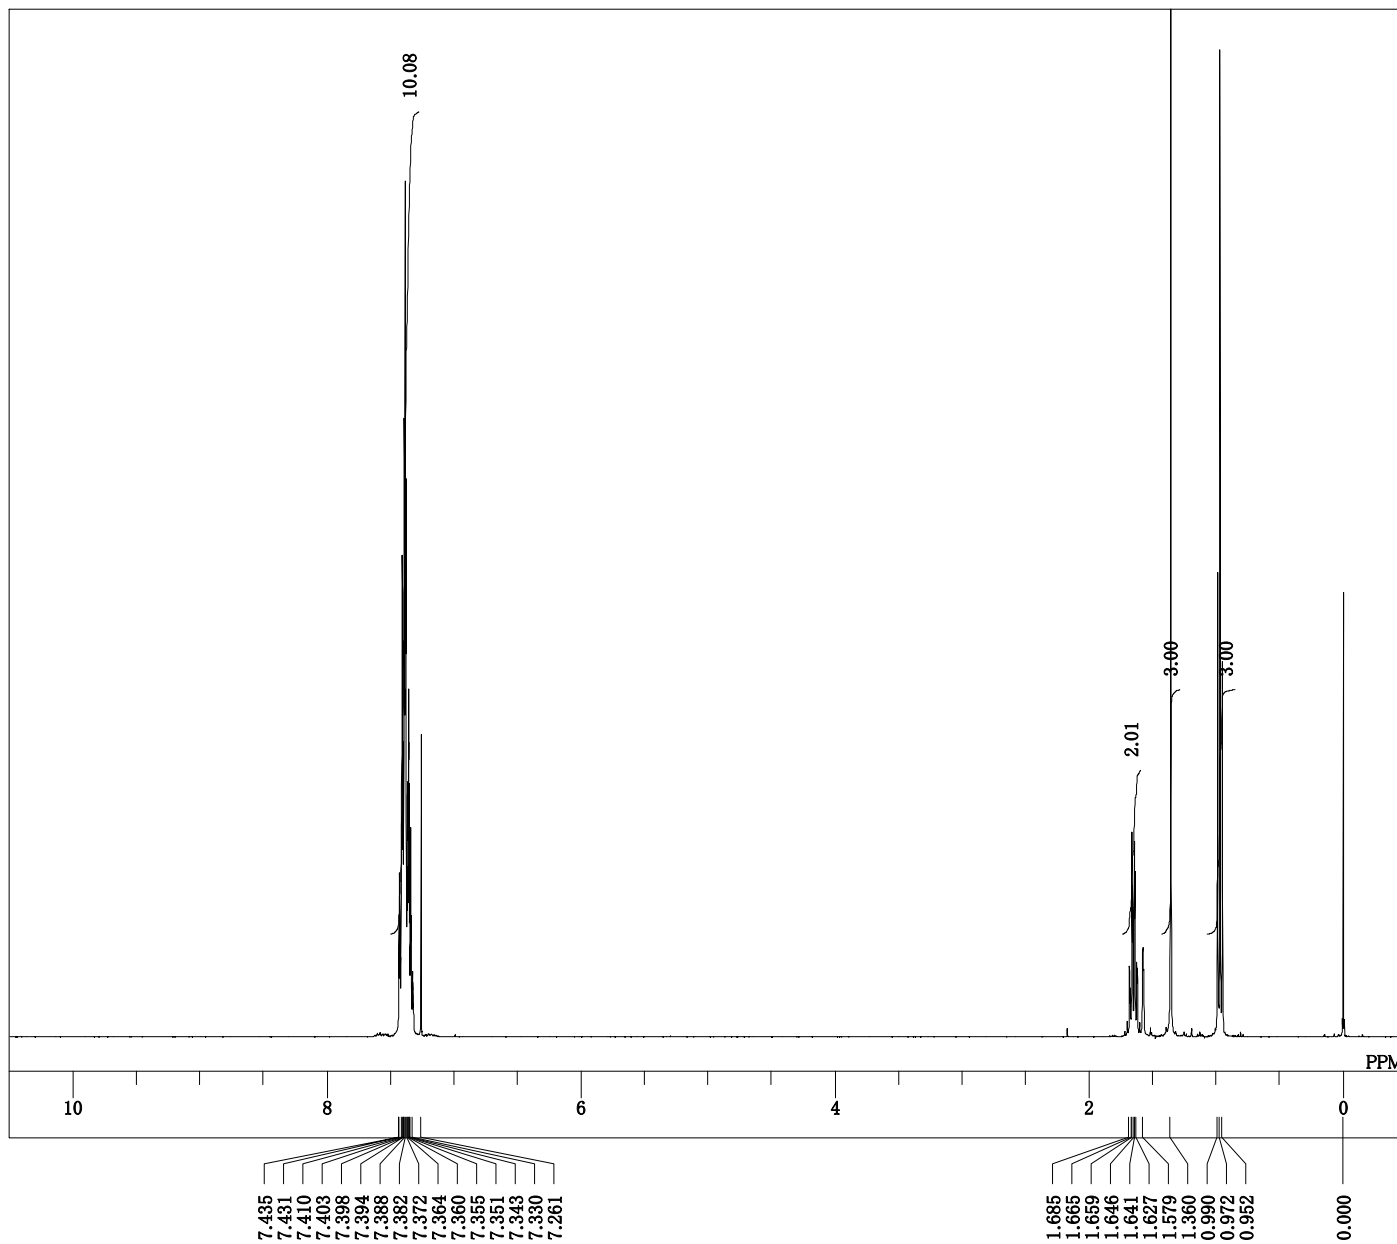

DFILE cyc\_Me\_Et\_Proton.als  
 COMNT single\_pulse  
 DATIM 2020-02-24 13:45:39  
 OBNUC 1H  
 EXMOD proton.jxp  
 OBFRQ 395.88 MHz  
 OBSET 6.28 KHz  
 OBFIN 0.87 Hz  
 POINT 13107  
 FREQU 5938.24 Hz  
 SCANS 8  
 ACQTM 2.2073 sec  
 PD 5.0000 sec  
 PW1 3.14 usec  
 IRNUC 1H  
 CTEMP 19.5 c  
 SLVNT CDCL3  
 EXREF 0.00 ppm  
 BF 0.12 Hz  
 RGAIN 36

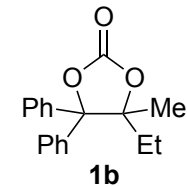

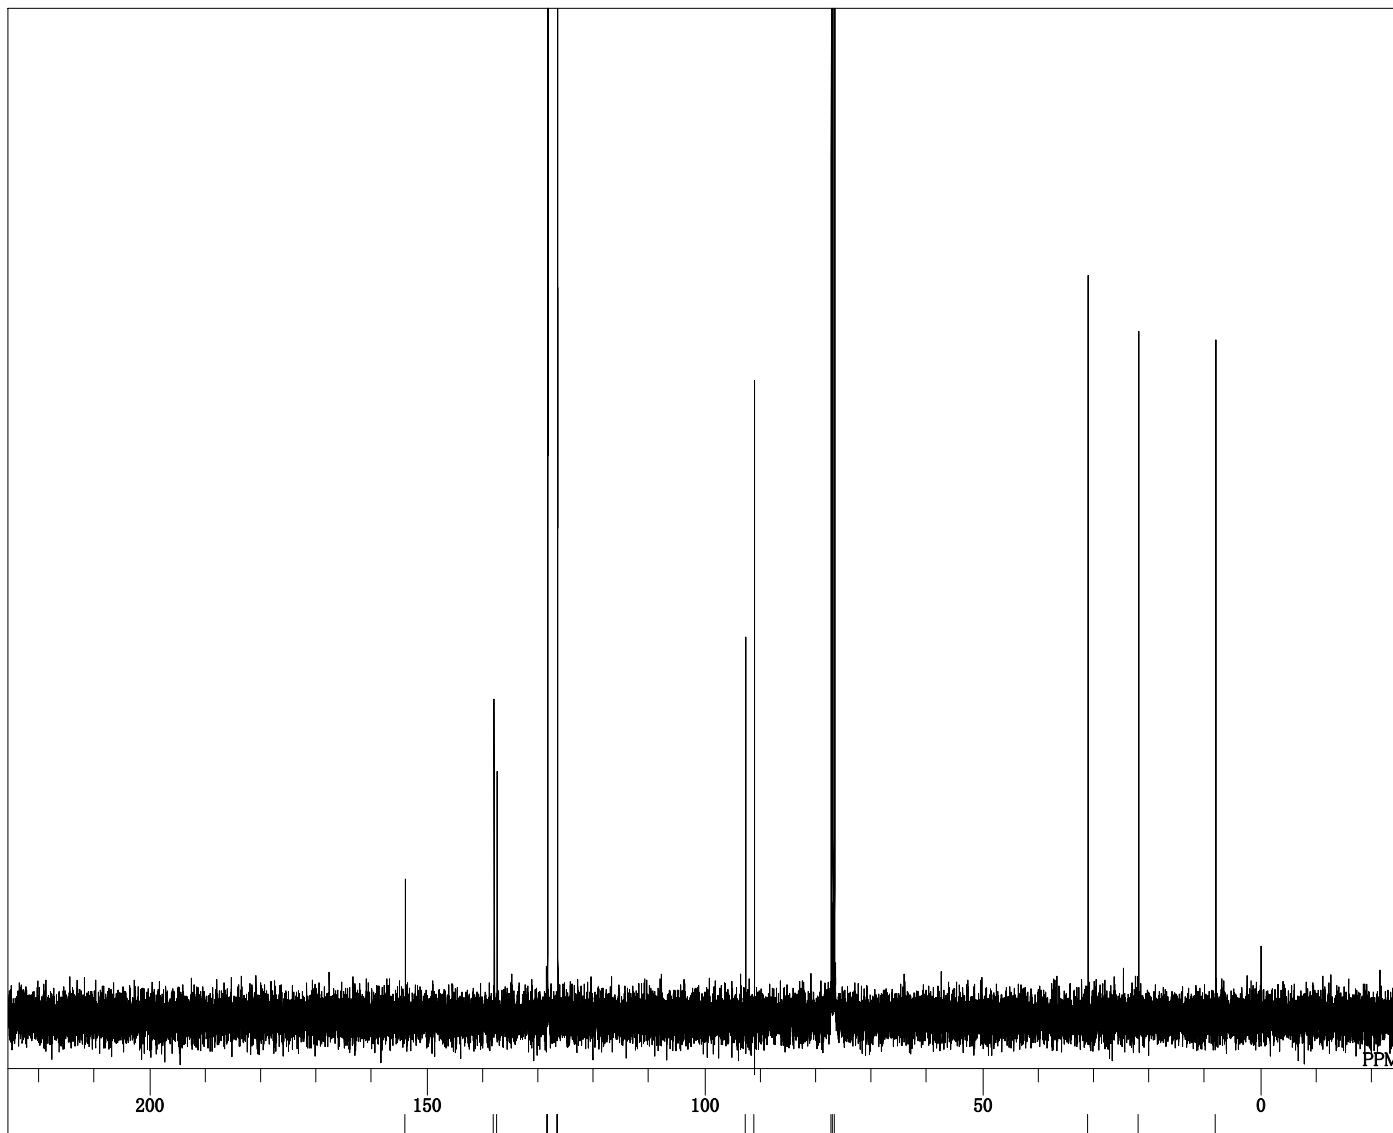

153.960

138.018

137.520

128.409

128.390

128.370

126.579

126.560

92.722

91.131

77.326

77.000

76.684

31.100

21.999

8.088

DFILE cyc\_Me\_Et\_Carbon.als  
 COMNT single pulse decoupled gated NOE  
 DATIM 2020-02-24 13:46:52  
 OBNUC 13C  
 EXMOD carbon.jxp  
 OBFRQ 99.55 MHz  
 OBSET 5.13 KHz  
 OBFIN 0.98 Hz  
 POINT 26214  
 FREQU 25000.00 Hz  
 SCANS 986  
 ACQTM 1.0486 sec  
 PD 2.0000 sec  
 PW1 3.59 usec  
 IRNUC 1H  
 CTEMP 19.7 c  
 SLVNT CDCL3  
 EXREF 77.00 ppm  
 BF 0.12 Hz  
 RGAIN 50

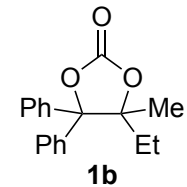

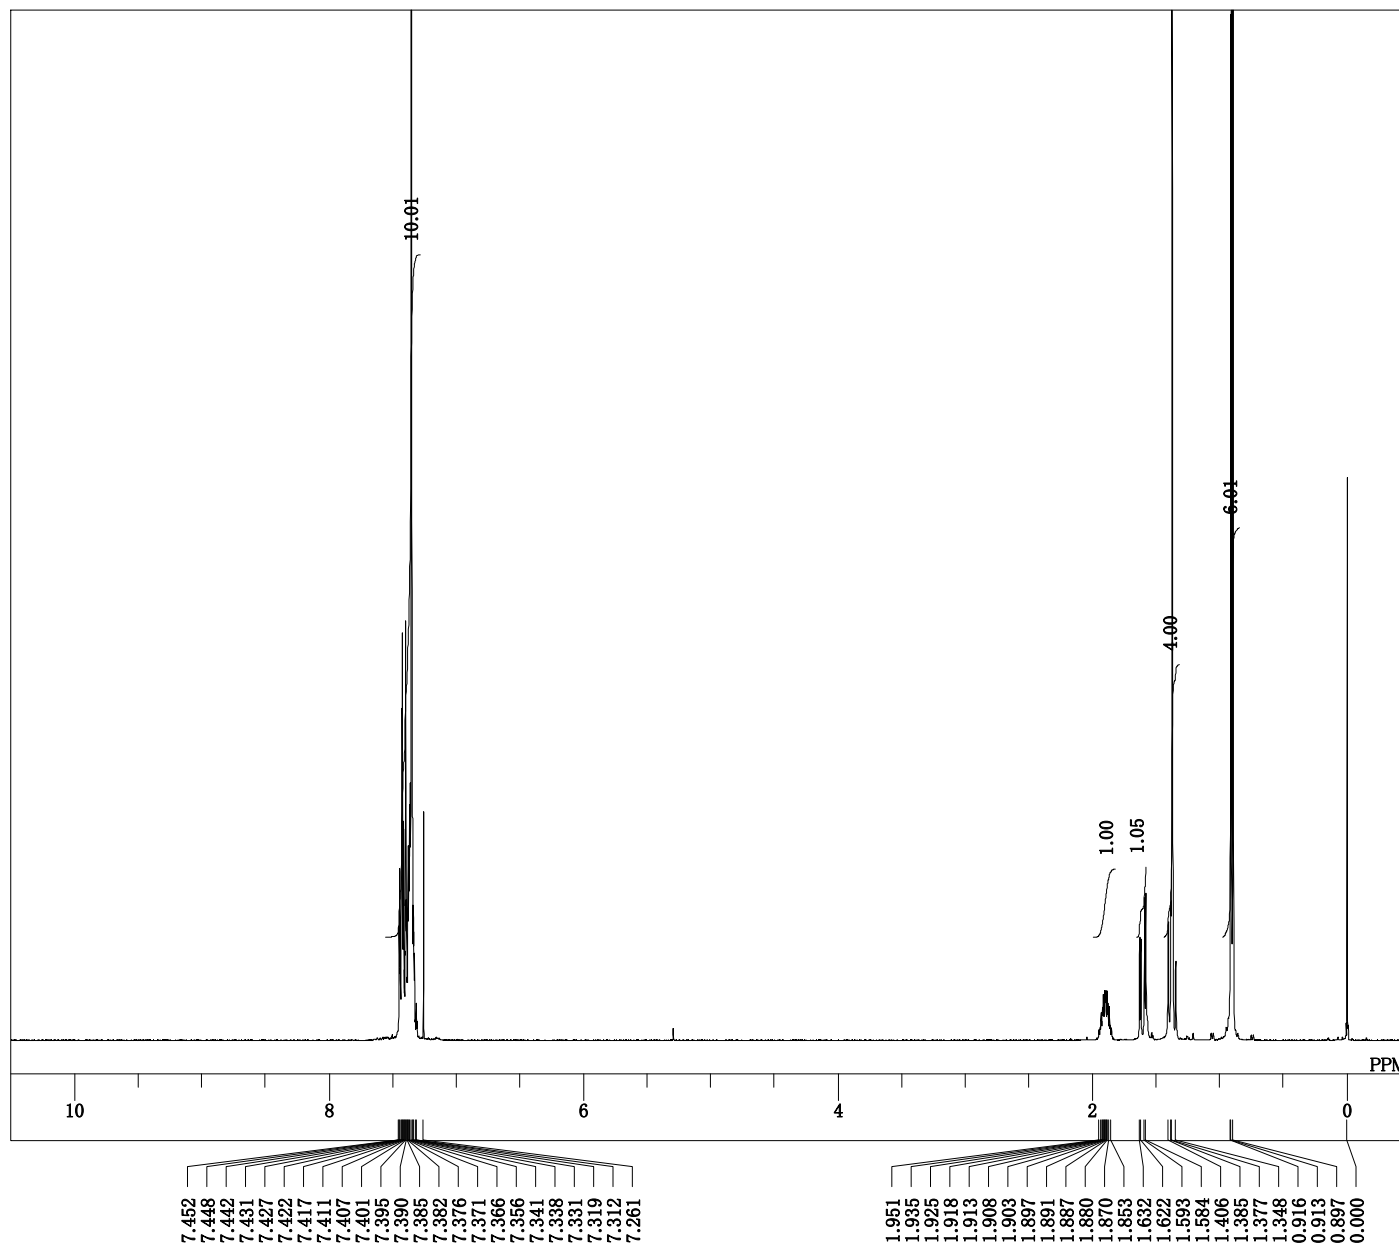

DFILE cyc\_Me\_iBu\_Proton.als  
 COMNT single\_pulse  
 DATIM 2020-03-26 23:25:26  
 OBNUC 1H  
 EXMOD proton.jxp  
 OBFRQ 395.88 MHz  
 OBSET 6.28 KHz  
 OBFIN 0.87 Hz  
 POINT 13107  
 FREQU 5938.24 Hz  
 SCANS 8  
 ACQTM 2.2073 sec  
 PD 5.0000 sec  
 PW1 3.14 usec  
 IRNUC 1H  
 CTEMP 19.5 c  
 SLVNT CDCL3  
 EXREF 0.00 ppm  
 BF 0.12 Hz  
 RGAIN 30

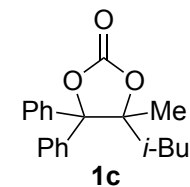

DFILE cyc\_Me\_iBu\_Carbon.als  
 COMNT single pulse decoupled gated NOE  
 DATIM 2020-03-26 23:26:39  
 OBNUC <sup>13</sup>C  
 EXMOD carbon.jxp  
 OBFRQ 99.55 MHz  
 OBSET 5.13 KHz  
 OBFIN 0.98 Hz  
 POINT 26214  
 FREQU 25000.00 Hz  
 SCANS 1024  
 ACQTM 1.0486 sec  
 PD 2.0000 sec  
 PW1 3.59 usec  
 IRNUC <sup>1</sup>H  
 CTEMP 19.3 c  
 SLVNT CDCL<sub>3</sub>  
 EXREF 0.00 ppm  
 BF 0.12 Hz  
 RGAIN 50

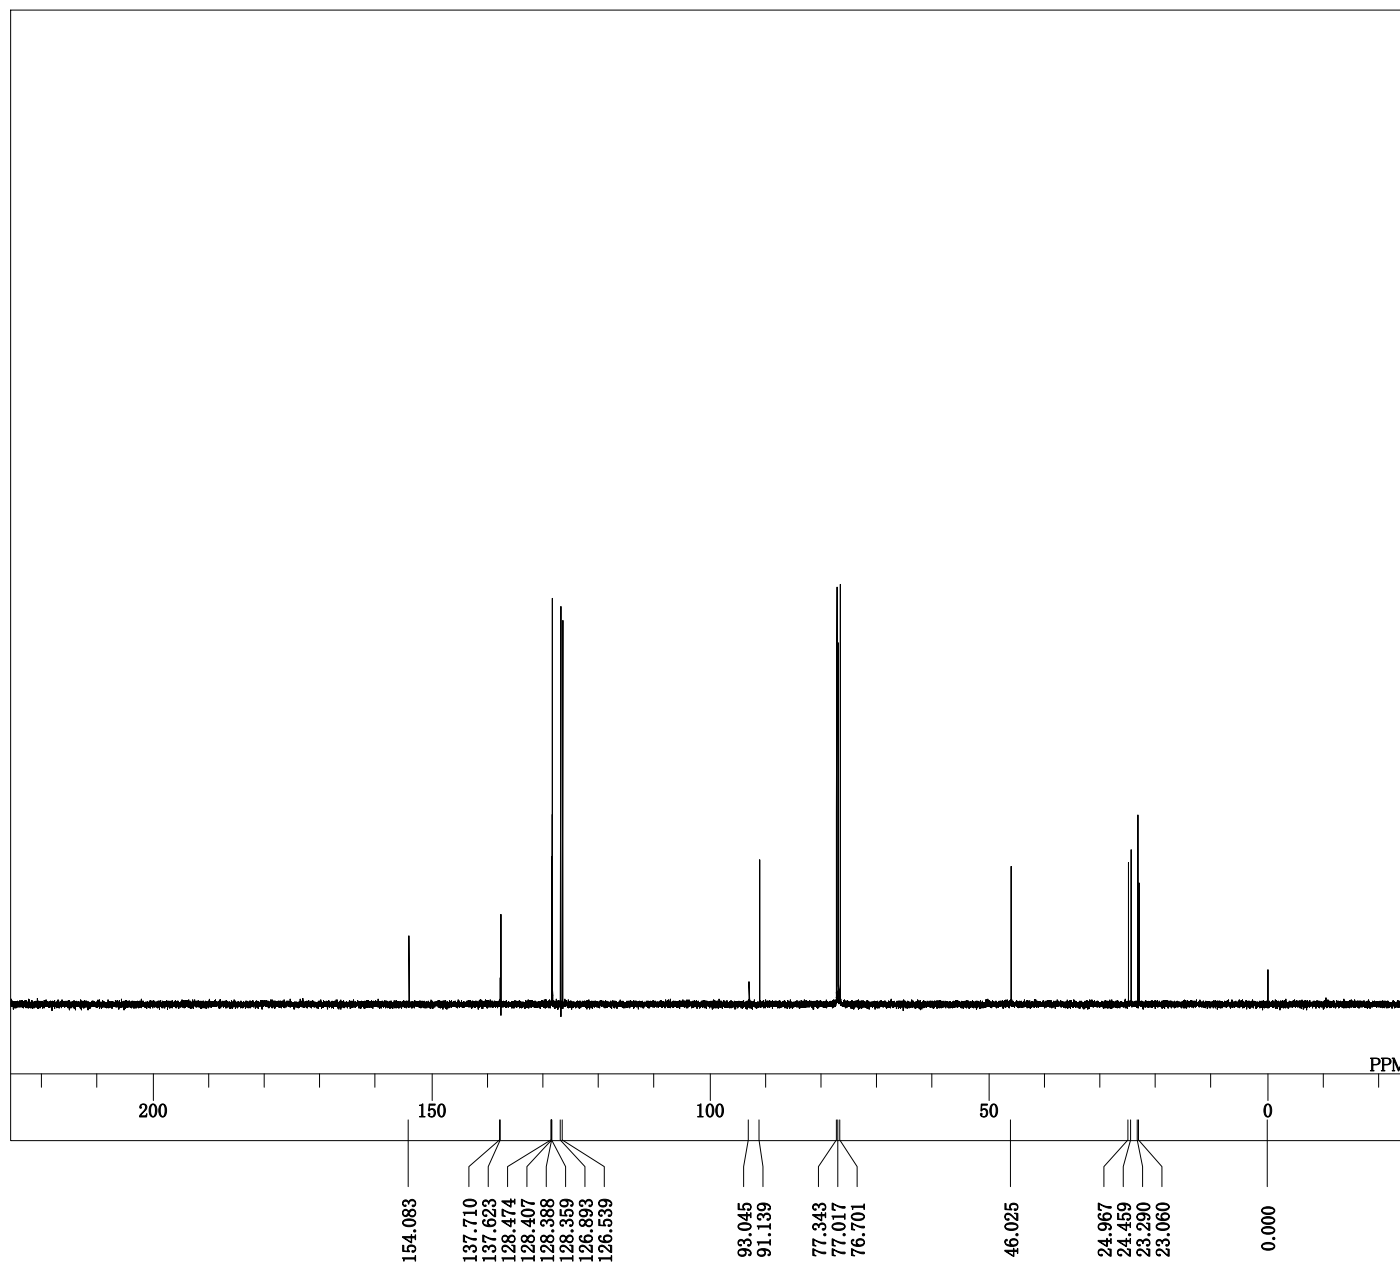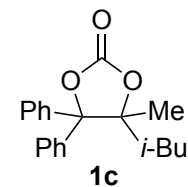

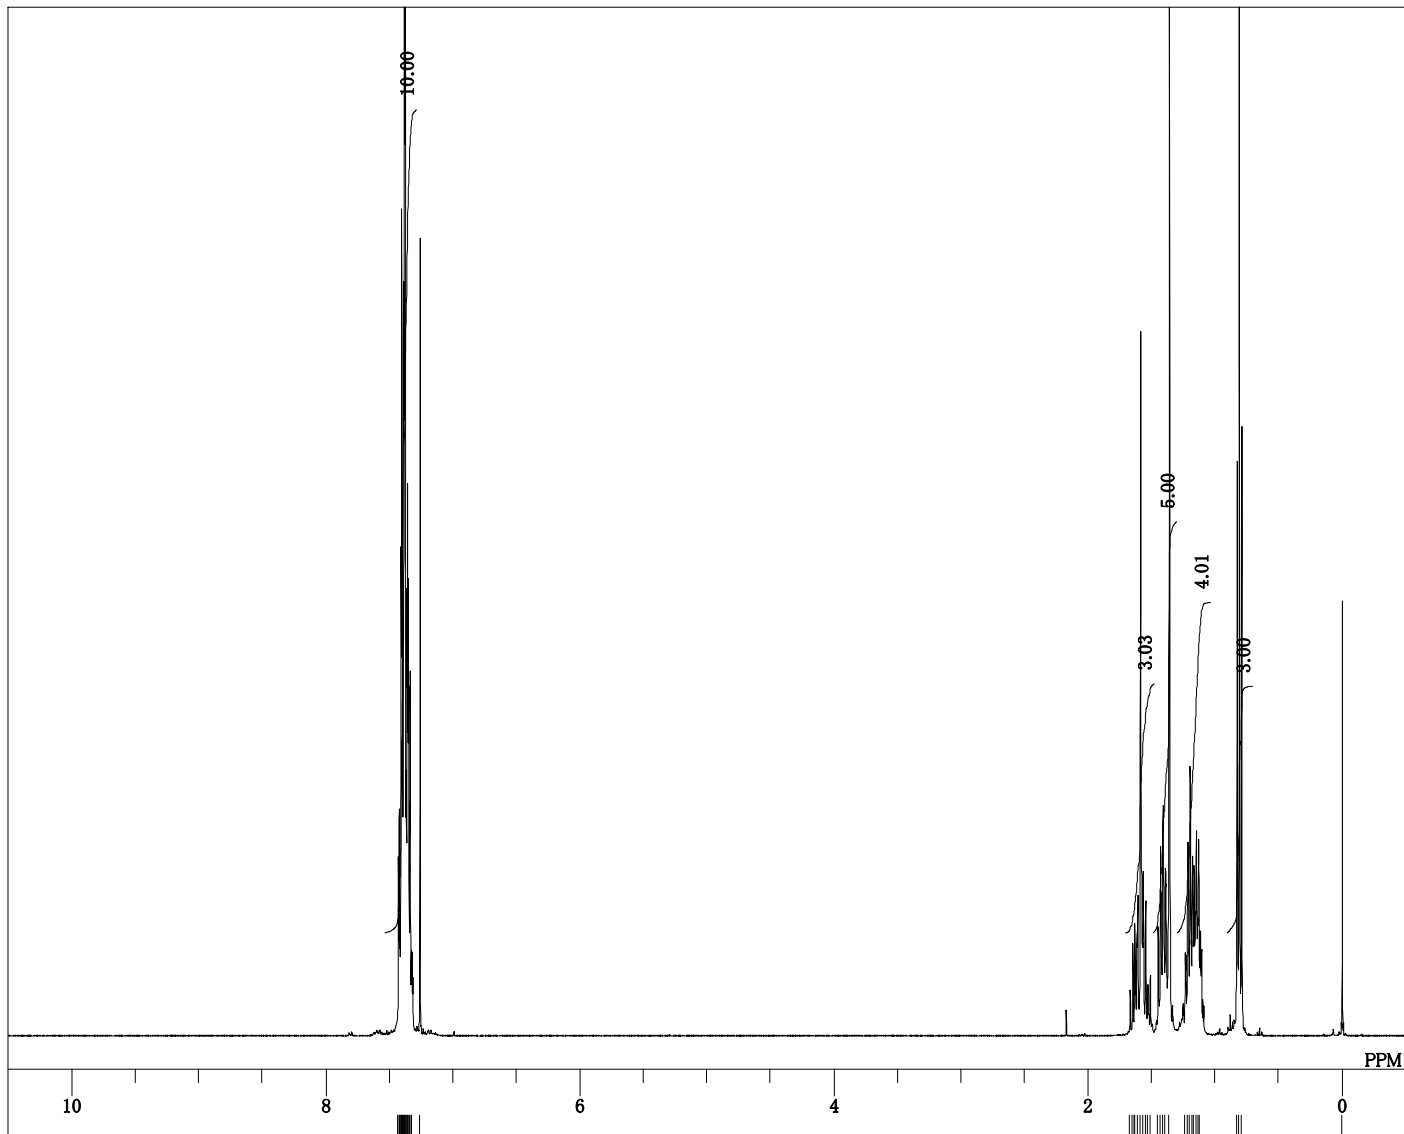

7.431  
7.425  
7.419  
7.410  
7.404  
7.400  
7.393  
7.390  
7.383  
7.378  
7.369  
7.364  
7.361  
7.356  
7.352  
7.339  
7.330  
7.323  
7.261

1.670  
1.648  
1.633  
1.627  
1.609  
1.588  
1.567  
1.547  
1.529  
1.511  
1.449  
1.431  
1.410  
1.392  
1.361  
1.236  
1.214  
1.197  
1.180  
1.167  
1.148  
1.132  
1.119  
0.829  
0.810  
0.792  
0.000

DFILE cyc\_Me\_nPentan\_Proton.als  
COMNT single\_pulse  
DATIM 2020-07-05 17:52:37  
OBNUC 1H  
EXMOD proton\_jxp  
OBFRQ 395.88 MHz  
OBSET 6.28 KHz  
OBFIN 0.87 Hz  
POINT 13107  
FREQU 5938.24 Hz  
SCANS 8  
ACQTM 2.2073 sec  
PD 5.0000 sec  
PW1 3.14 usec  
IRNUC 1H  
CTEMP 20.4 c  
SLVNT CDCL3  
EXREF 0.00 ppm  
BF 0.12 Hz  
RGAIN 34

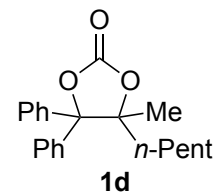



DFILE cyc\_PhPhMenPentyl\_Carbon.als  
 COMNT single pulse decoupled gated NOE  
 DATIM 2022-04-26 06:37:06  
 OBNUC <sup>13</sup>C  
 EXMOD carbon.jxp  
 OBFRQ 99.55 MHz  
 OBSET 5.13 KHz  
 OBFIN 0.98 Hz  
 POINT 32767  
 FREQU 31250.00 Hz  
 SCANS 1650  
 ACQTM 1.0486 sec  
 PD 2.0000 sec  
 PW1 3.67 usec  
 IRNUC <sup>1</sup>H  
 CTEMP 20.2 c  
 SLVNT CDCL<sub>3</sub>  
 EXREF 77.00 ppm  
 BF 0.12 Hz  
 RGAIN 50

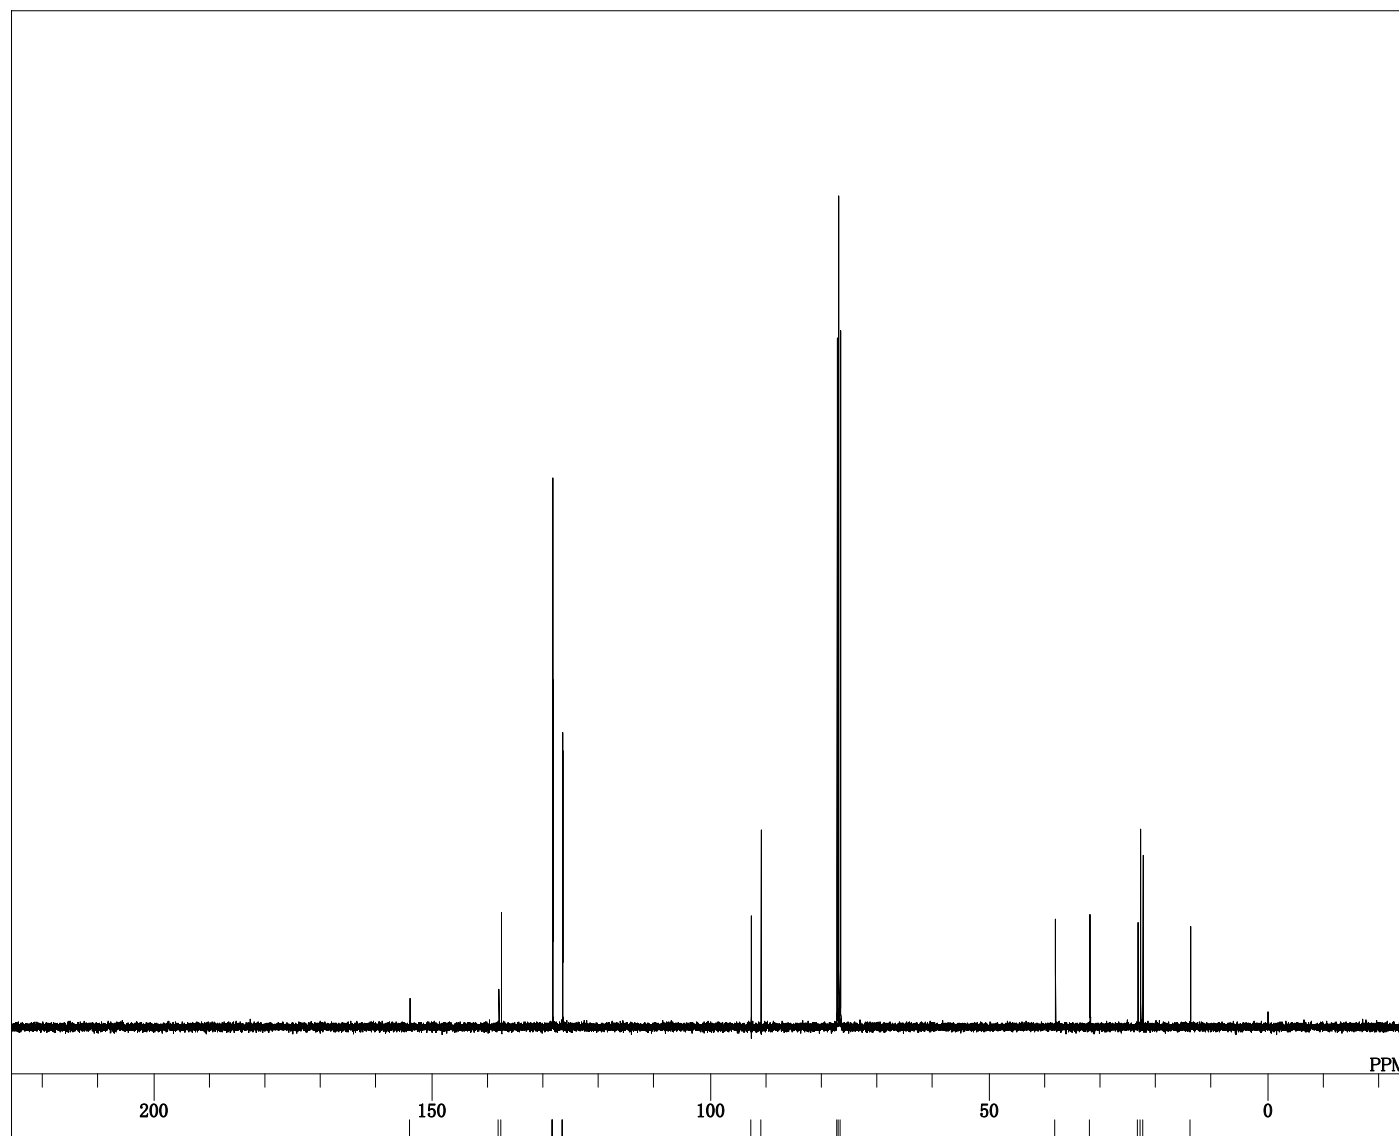

153.987

138.017

137.548

128.398

128.379

128.360

126.588

126.559

92.760

90.968

77.316

77.000

76.674

38.085

31.867

23.293

22.756

22.383

13.866

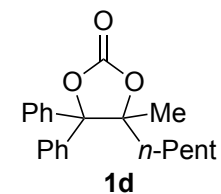

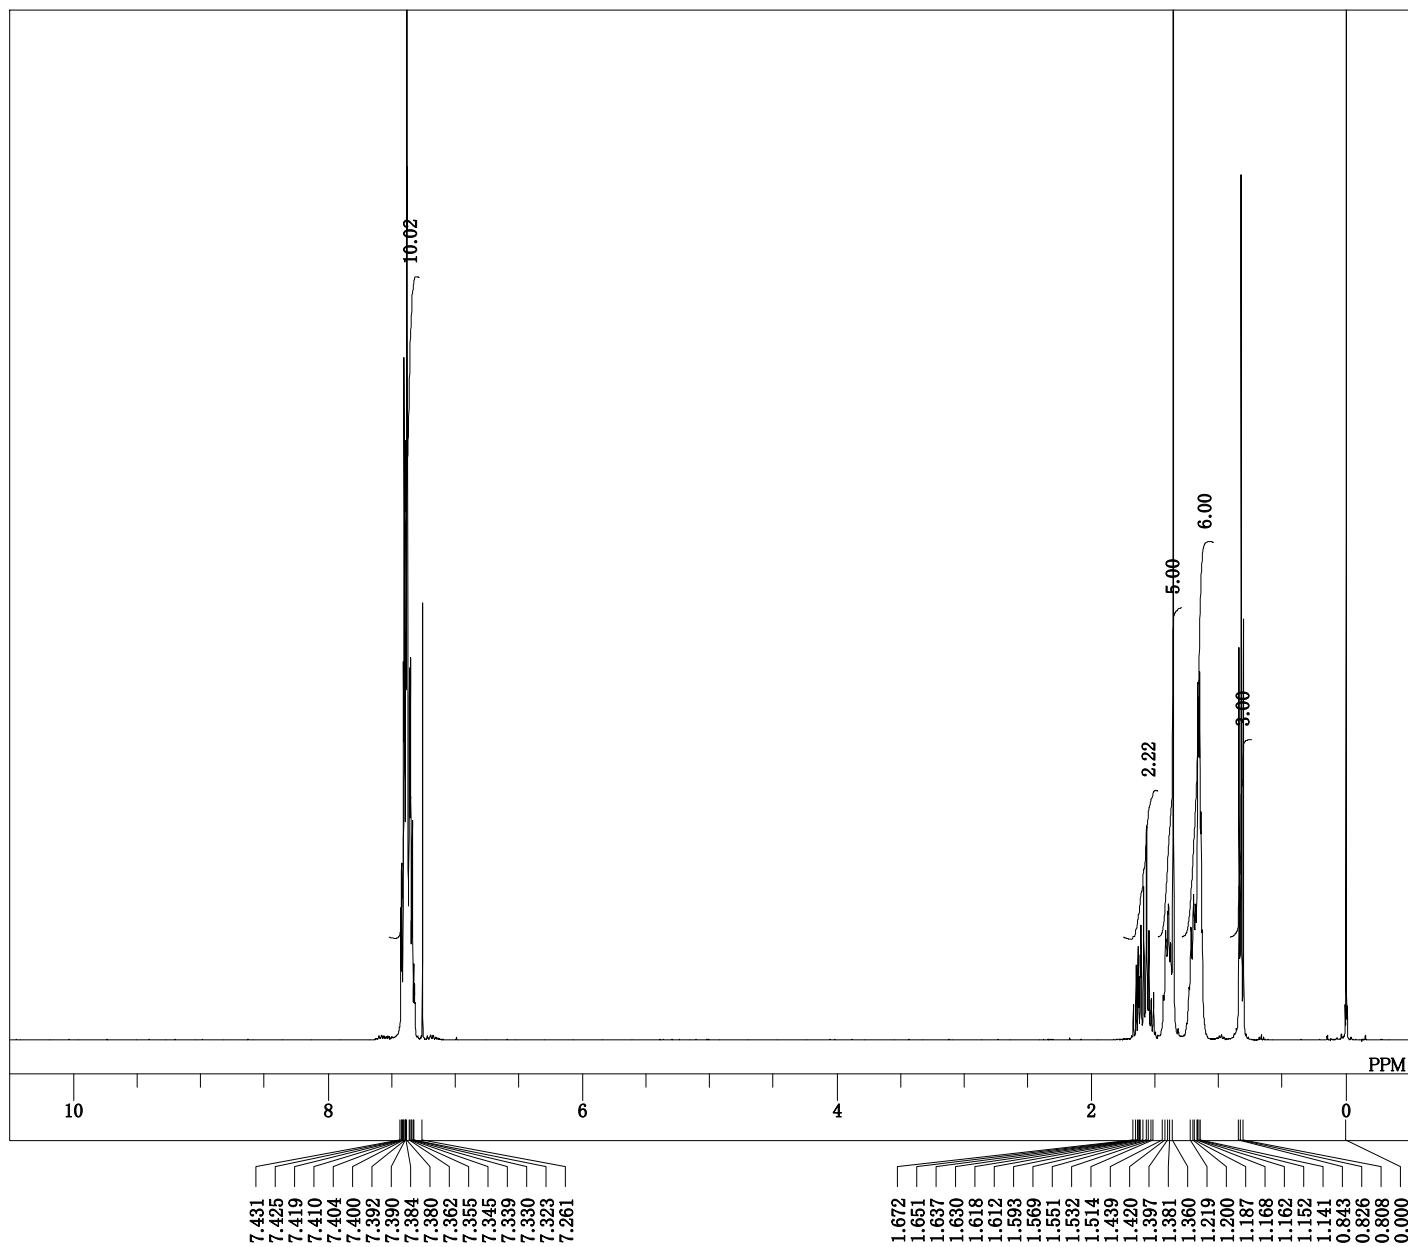

DFILE cyc\_Me\_nHex\_Proton.als  
 COMNT single\_pulse  
 DATIM 2020-03-27 00:47:07  
 OBNUC 1H  
 EXMOD proton.jxp  
 OBFRQ 395.88 MHz  
 OBSET 6.28 KHz  
 OBFIN 0.87 Hz  
 POINT 13107  
 FREQU 5938.24 Hz  
 SCANS 8  
 ACQTM 2.2073 sec  
 PD 5.0000 sec  
 PW1 3.14 usec  
 IRNUC 1H  
 CTEMP 19.8 c  
 SLVNT CDCL3  
 EXREF 0.00 ppm  
 BF 0.12 Hz  
 RGAIN 34

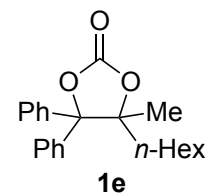

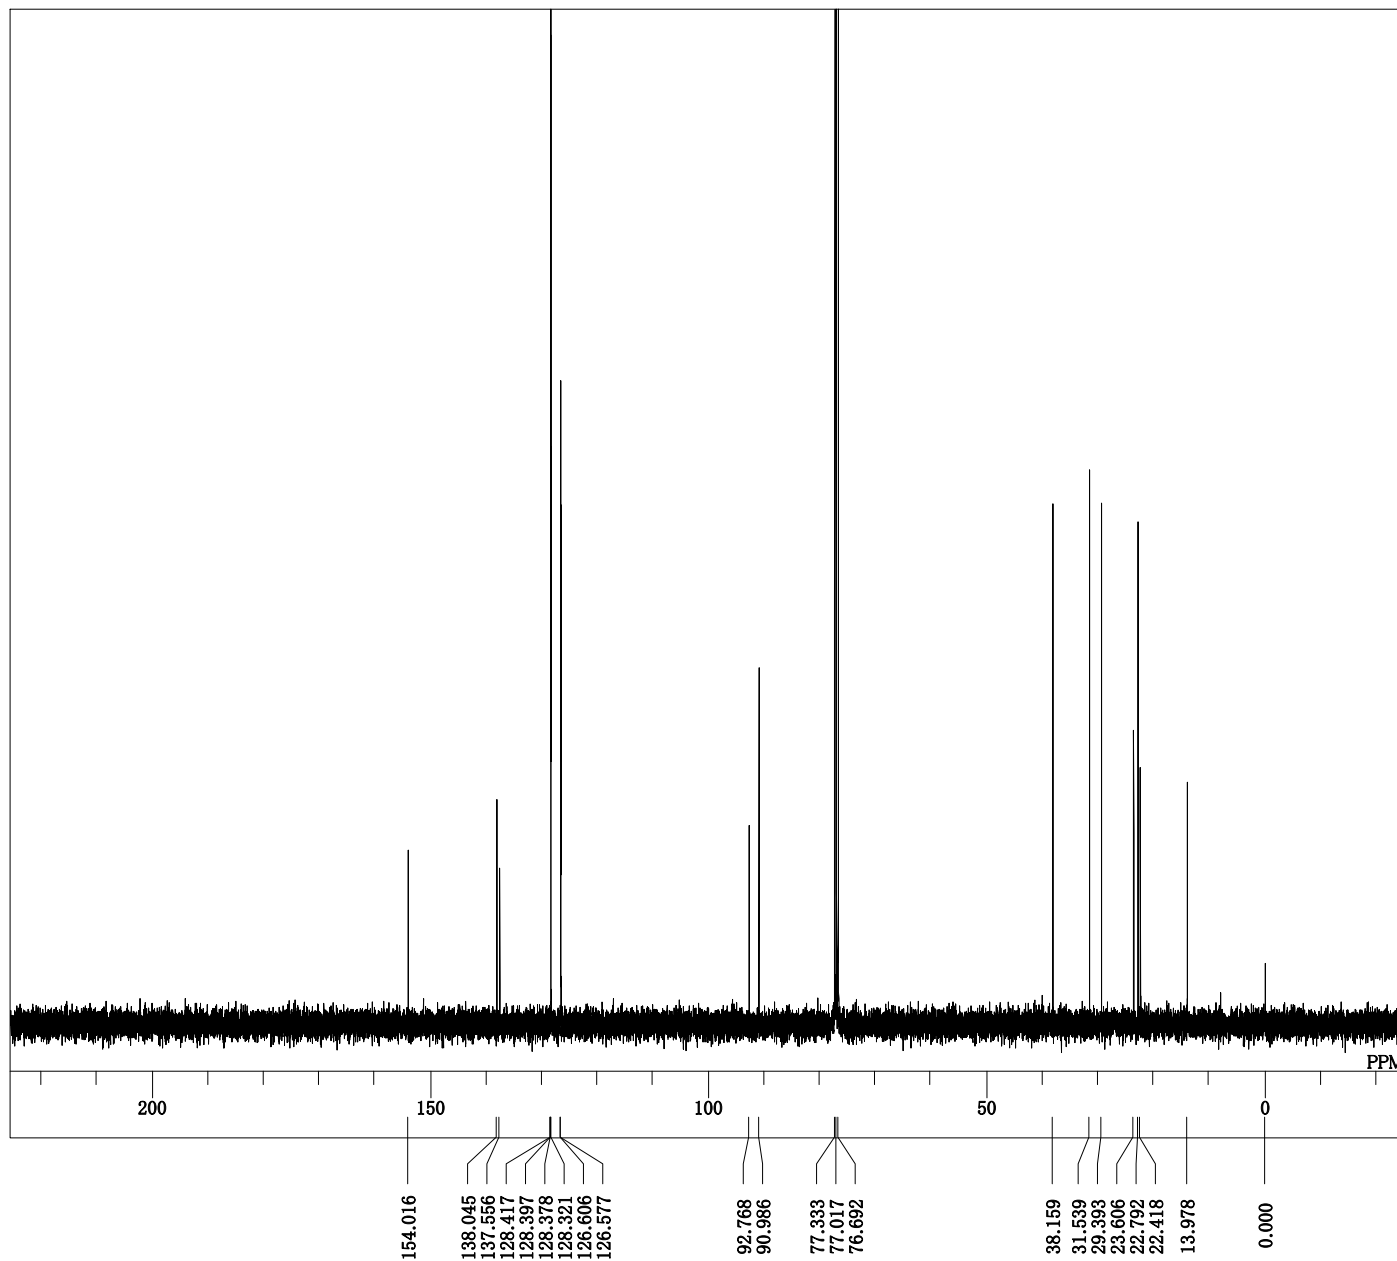

DFILE cyc\_Me\_nHex\_Carbon.als  
 COMNT single pulse decoupled gated NOE  
 DATIM 2020-03-27 00:48:19  
 OBNUC <sup>13</sup>C  
 EXMOD carbon.jxp  
 OBFRQ 99.55 MHz  
 OBSET 5.13 KHz  
 OBFIN 0.98 Hz  
 POINT 26214  
 FREQU 25000.00 Hz  
 SCANS 1024  
 ACQTM 1.0486 sec  
 PD 2.0000 sec  
 PW1 3.59 usec  
 IRNUC <sup>1</sup>H  
 CTEMP 19.8 c  
 SLVNT CDCL3  
 EXREF 0.00 ppm  
 BF 0.12 Hz  
 RGAIN 50

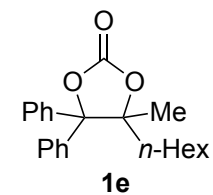

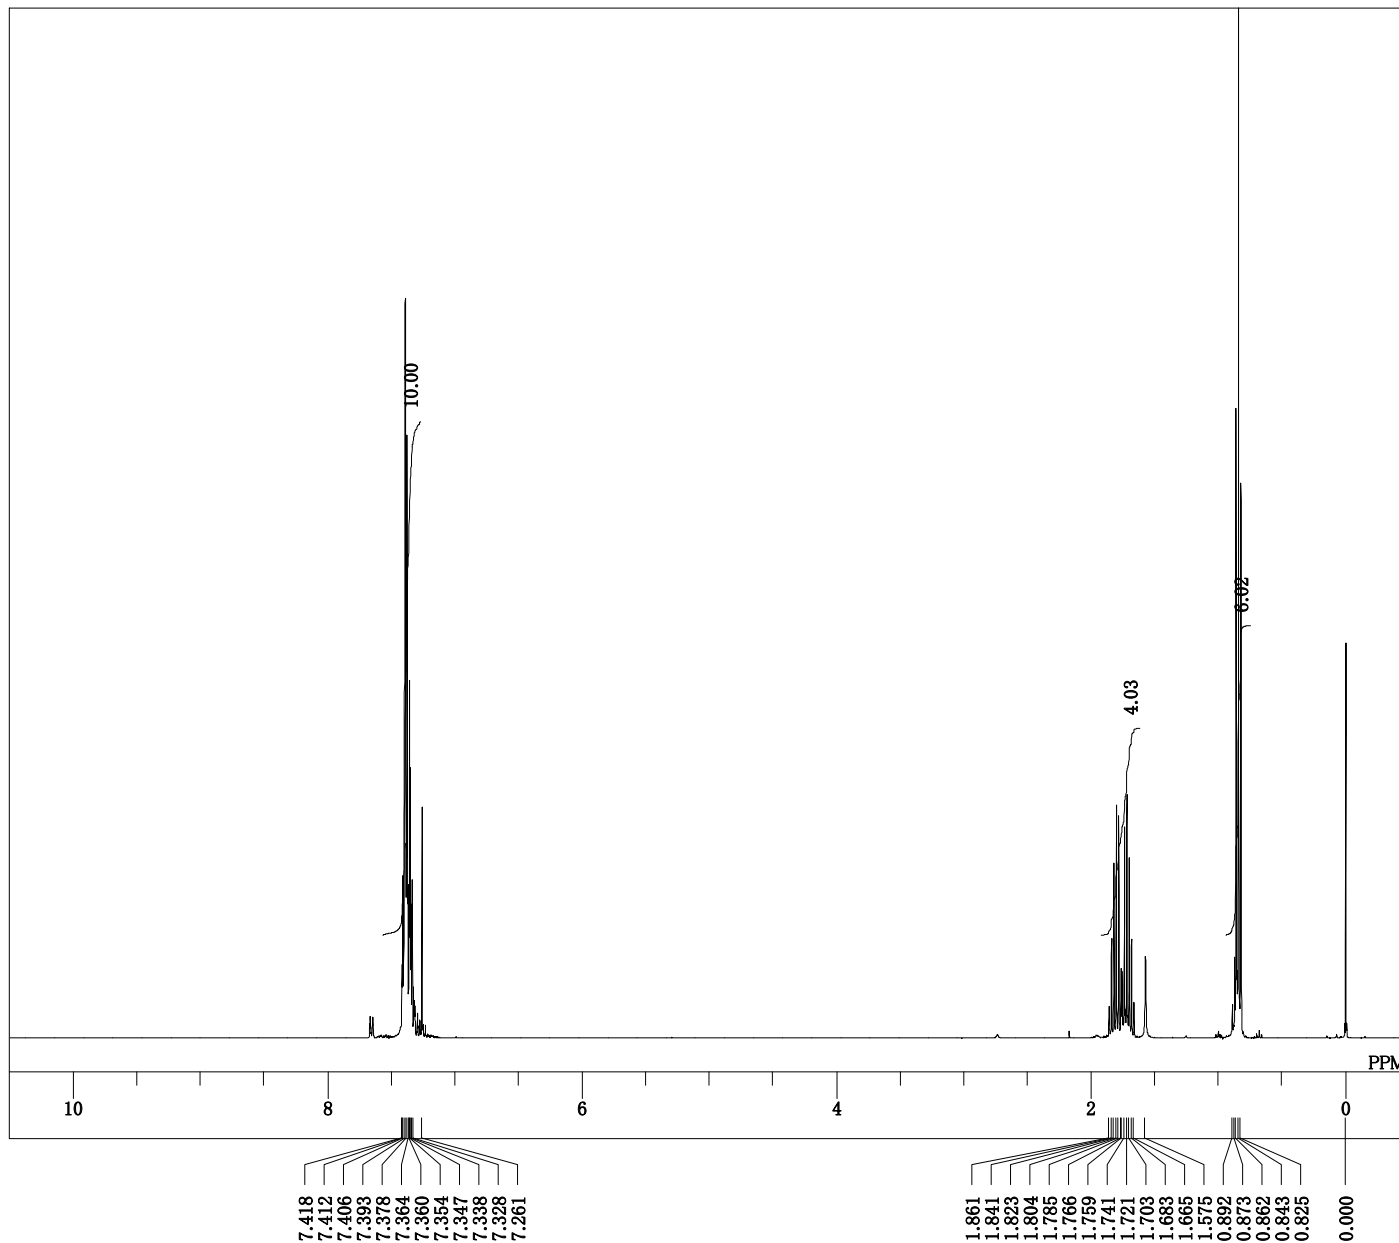

DFILE cyc\_Et\_Et\_Proton.als  
 COMNT single\_pulse  
 DATIM 2020-02-24 14:42:55  
 OBNUC 1H  
 EXMOD proton\_jxp  
 OBFRQ 395.88 MHz  
 OBSET 6.28 KHz  
 OBFIN 0.87 Hz  
 POINT 13107  
 FREQU 5938.24 Hz  
 SCANS 8  
 ACQTM 2.2073 sec  
 PD 5.0000 sec  
 PW1 3.14 usec  
 IRNUC 1H  
 CTEMP 19.8 c  
 SLVNT CDCL3  
 EXREF 0.00 ppm  
 BF 0.12 Hz  
 RGAIN 36

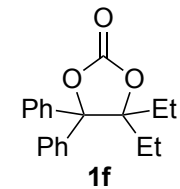

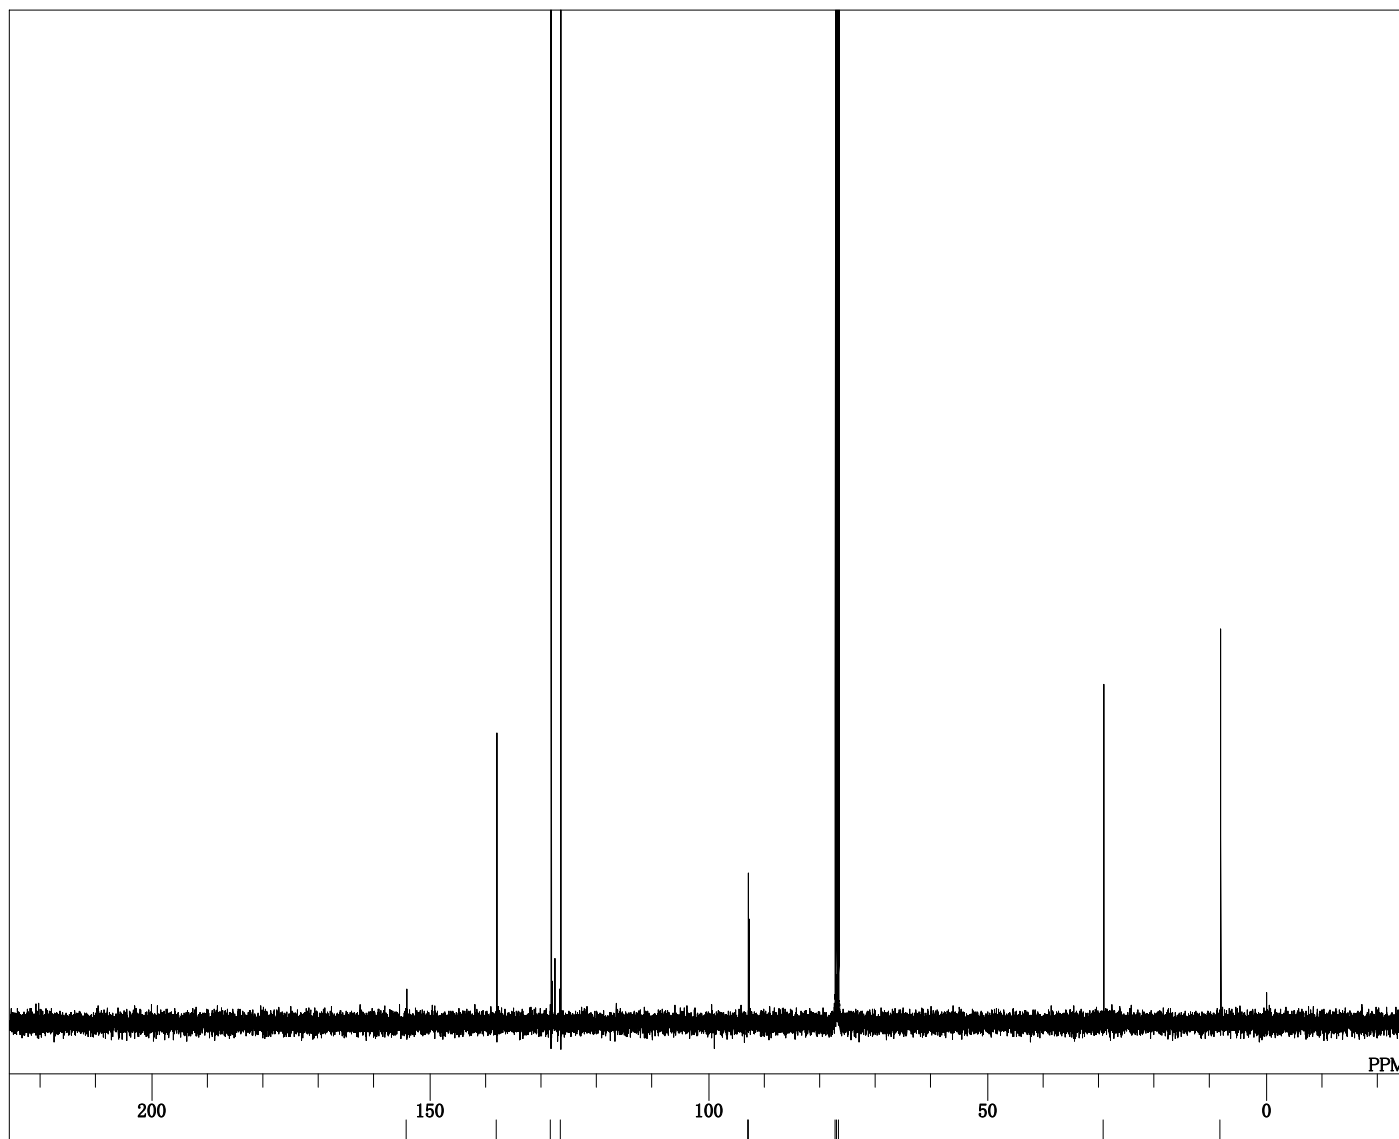

154.257

138.056

128.332  
126.598

92.971  
92.865

77.316  
77.000  
76.674

29.155

8.155

PPM

DFILE cyc\_Et\_Et\_Carbon.als  
 COMNT single pulse decoupled gated NOE  
 DATIM 2020-02-24 14:44:08  
 OBNUC 13C  
 EXMOD carbon.jxp  
 OBFRQ 99.55 MHz  
 OBSET 5.13 KHz  
 OBFIN 0.98 Hz  
 POINT 26214  
 FREQU 25000.00 Hz  
 SCANS 1024  
 ACQTM 1.0486 sec  
 PD 2.0000 sec  
 PW1 3.59 usec  
 IRNUC 1H  
 CTEMP 19.6 c  
 SLVNT CDCL3  
 EXREF 77.00 ppm  
 BF 0.12 Hz  
 RGAIN 50

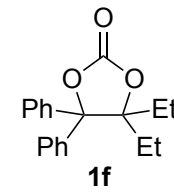

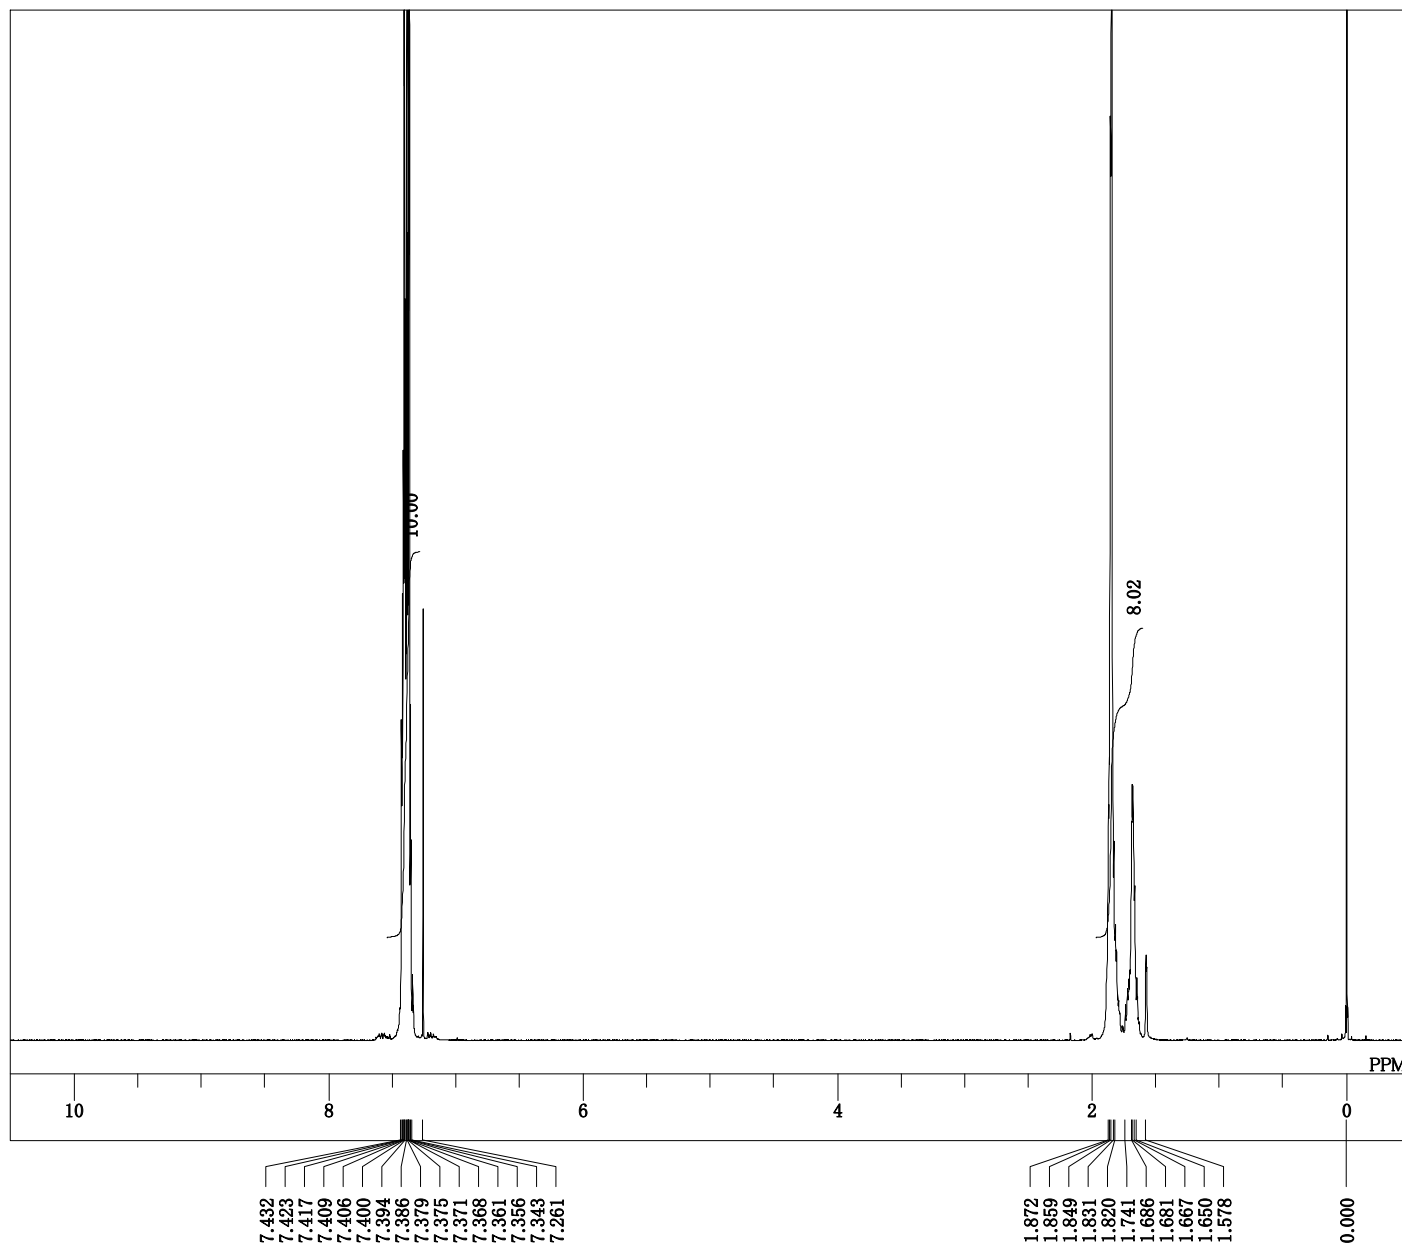

DFILE cyc\_cyc\_pentyl\_Proton.als  
 COMNT single\_pulse  
 DATIM 2020-03-27 04:44:33  
 OBNUC 1H  
 EXMOD proton\_jxp  
 OBFRQ 395.88 MHz  
 OBSET 6.28 KHz  
 OBFIN 0.87 Hz  
 POINT 13107  
 FREQU 5938.24 Hz  
 SCANS 8  
 ACQTM 2.2073 sec  
 PD 5.0000 sec  
 PW1 3.14 usec  
 IRNUC 1H  
 CTEMP 19.7 c  
 SLVNT CDCL3  
 EXREF 0.00 ppm  
 BF 0.12 Hz  
 RGAIN 34

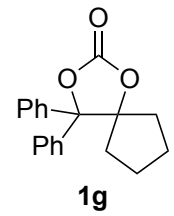

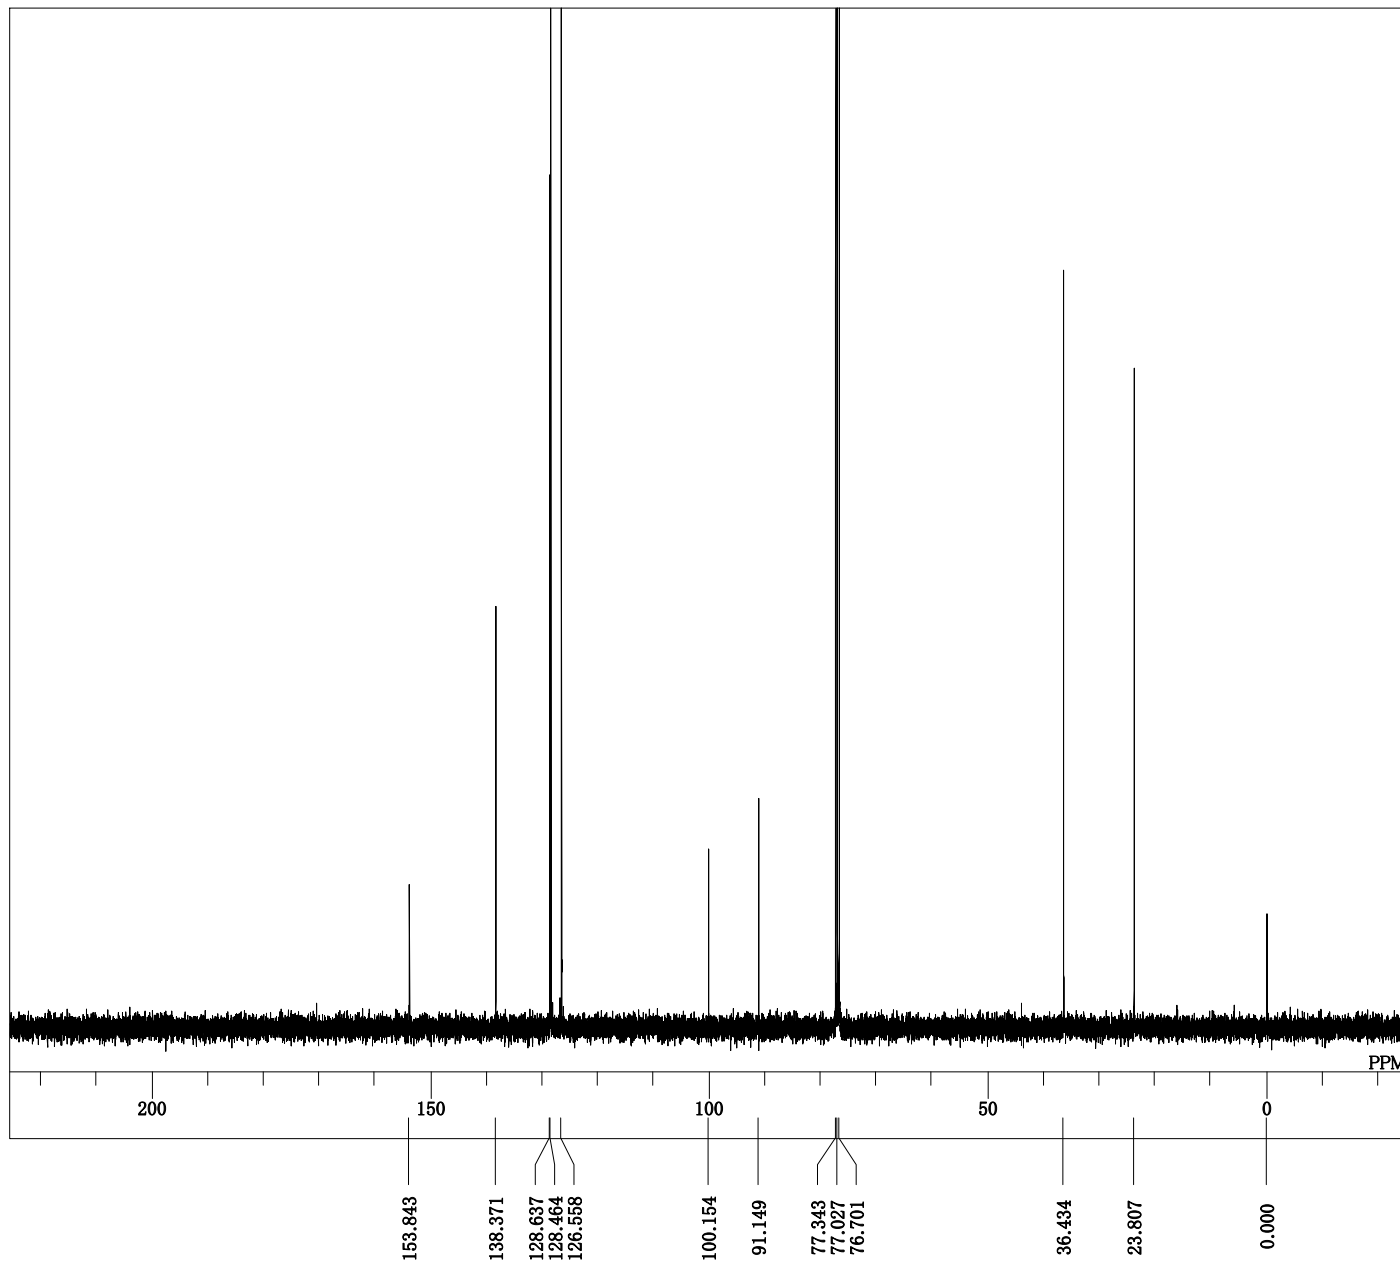

DFILE cyc\_cyc\_pentyl\_Carbon.als  
 COMNT single pulse decoupled gated NOE  
 DATIM 2020-03-27 04:45:46  
 OBNUC <sup>13</sup>C  
 EXMOD carbon.jxp  
 OBFRQ 99.55 MHz  
 OBSET 5.13 KHz  
 OBFIN 0.98 Hz  
 POINT 26214  
 FREQU 25000.00 Hz  
 SCANS 1024  
 ACQTM 1.0486 sec  
 PD 2.0000 sec  
 PW1 3.59 usec  
 IRNUC <sup>1</sup>H  
 CTEMP 19.9 c  
 SLVNT CDCL<sub>3</sub>  
 EXREF 0.00 ppm  
 BF 0.12 Hz  
 RGAIN 50

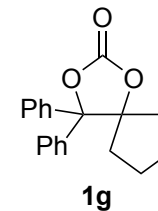

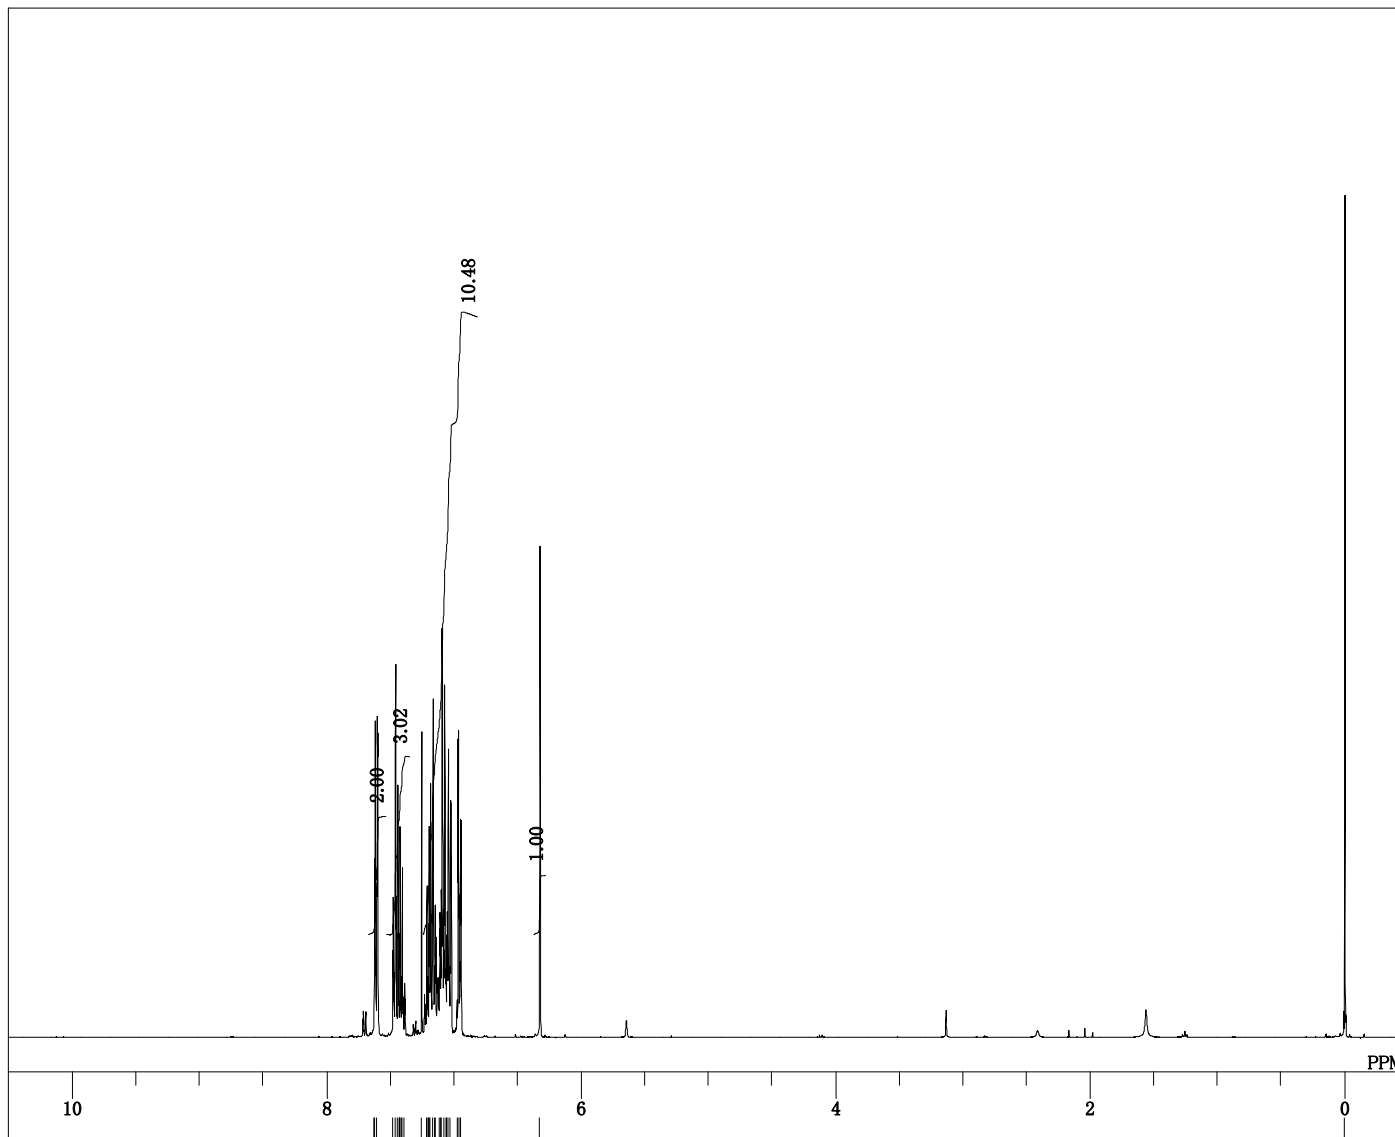

DFILE cyc\_H\_Ph\_Proton.als  
 COMNT single\_pulse  
 DATIM 2020-03-27 06:43:32  
 OBNUC 1H  
 EXMOD proton\_jxp  
 OBFRQ 395.88 MHz  
 OBSET 6.28 KHz  
 OBFIN 0.87 Hz  
 POINT 13107  
 FREQU 5938.24 Hz  
 SCANS 8  
 ACQTM 2.2073 sec  
 PD 5.0000 sec  
 PW1 3.14 usec  
 IRNUC 1H  
 CTEMP 19.7 c  
 SLVNT CDCL3  
 EXREF 0.00 ppm  
 BF 0.12 Hz  
 RGAIN 36

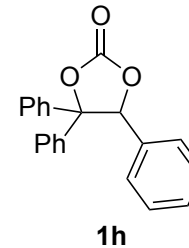

7.626  
 7.622  
 7.605  
 7.479  
 7.462  
 7.442  
 7.430  
 7.426  
 7.423  
 7.415  
 7.408  
 7.390  
 7.257  
 7.214  
 7.201  
 7.197  
 7.193  
 7.186  
 7.166  
 7.149  
 7.145  
 7.111  
 7.101  
 7.095  
 7.076  
 7.060  
 7.053  
 7.045  
 7.028  
 6.971  
 6.967  
 6.951  
 6.947  
 6.326



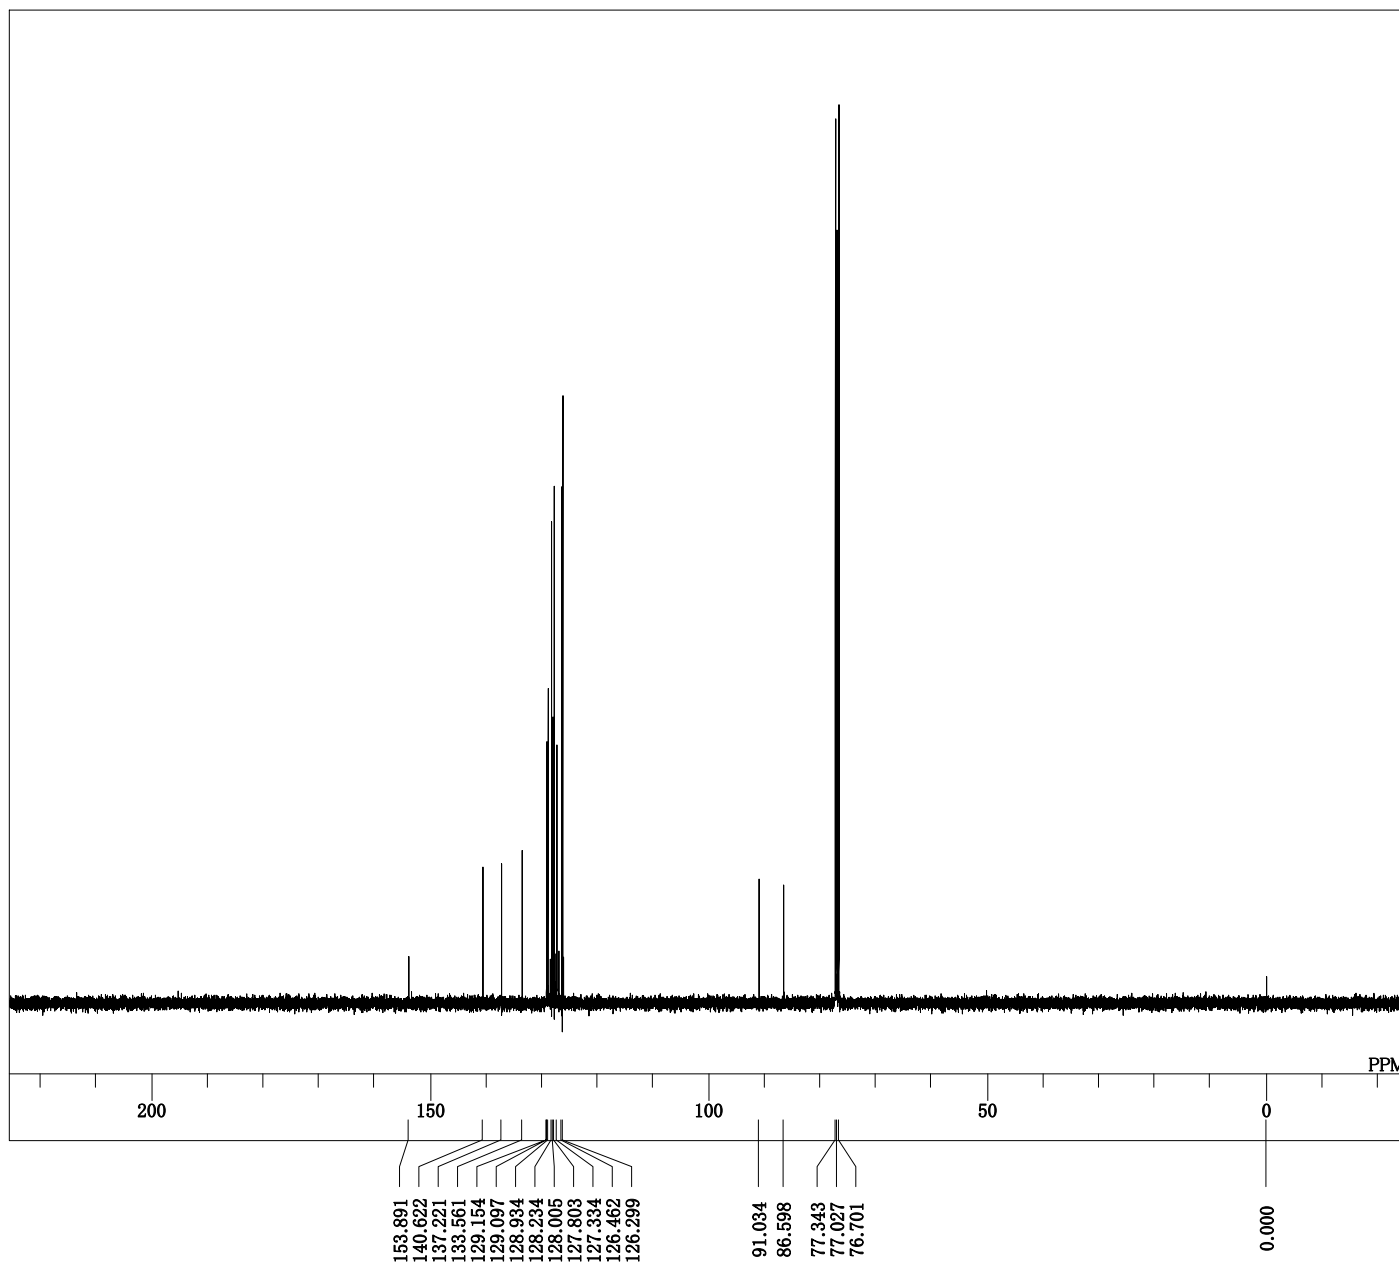

DFILE cyc\_H\_Ph\_Carbon.als  
 COMNT single pulse decoupled gated NOE  
 DATIM 2020-03-27 06:44:45  
 OBNUC <sup>13</sup>C  
 EXMOD carbon.jxp  
 OBFRQ 99.55 MHz  
 OBSET 5.13 KHz  
 OBFIN 0.98 Hz  
 POINT 26214  
 FREQU 25000.00 Hz  
 SCANS 1024  
 ACQTM 1.0486 sec  
 PD 2.0000 sec  
 PW1 3.59 usec  
 IRNUC <sup>1</sup>H  
 CTEMP 19.3 c  
 SLVNT CDCL<sub>3</sub>  
 EXREF 0.00 ppm  
 BF 0.12 Hz  
 RGAIN 50

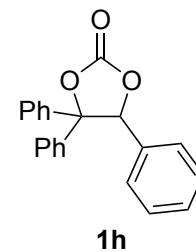

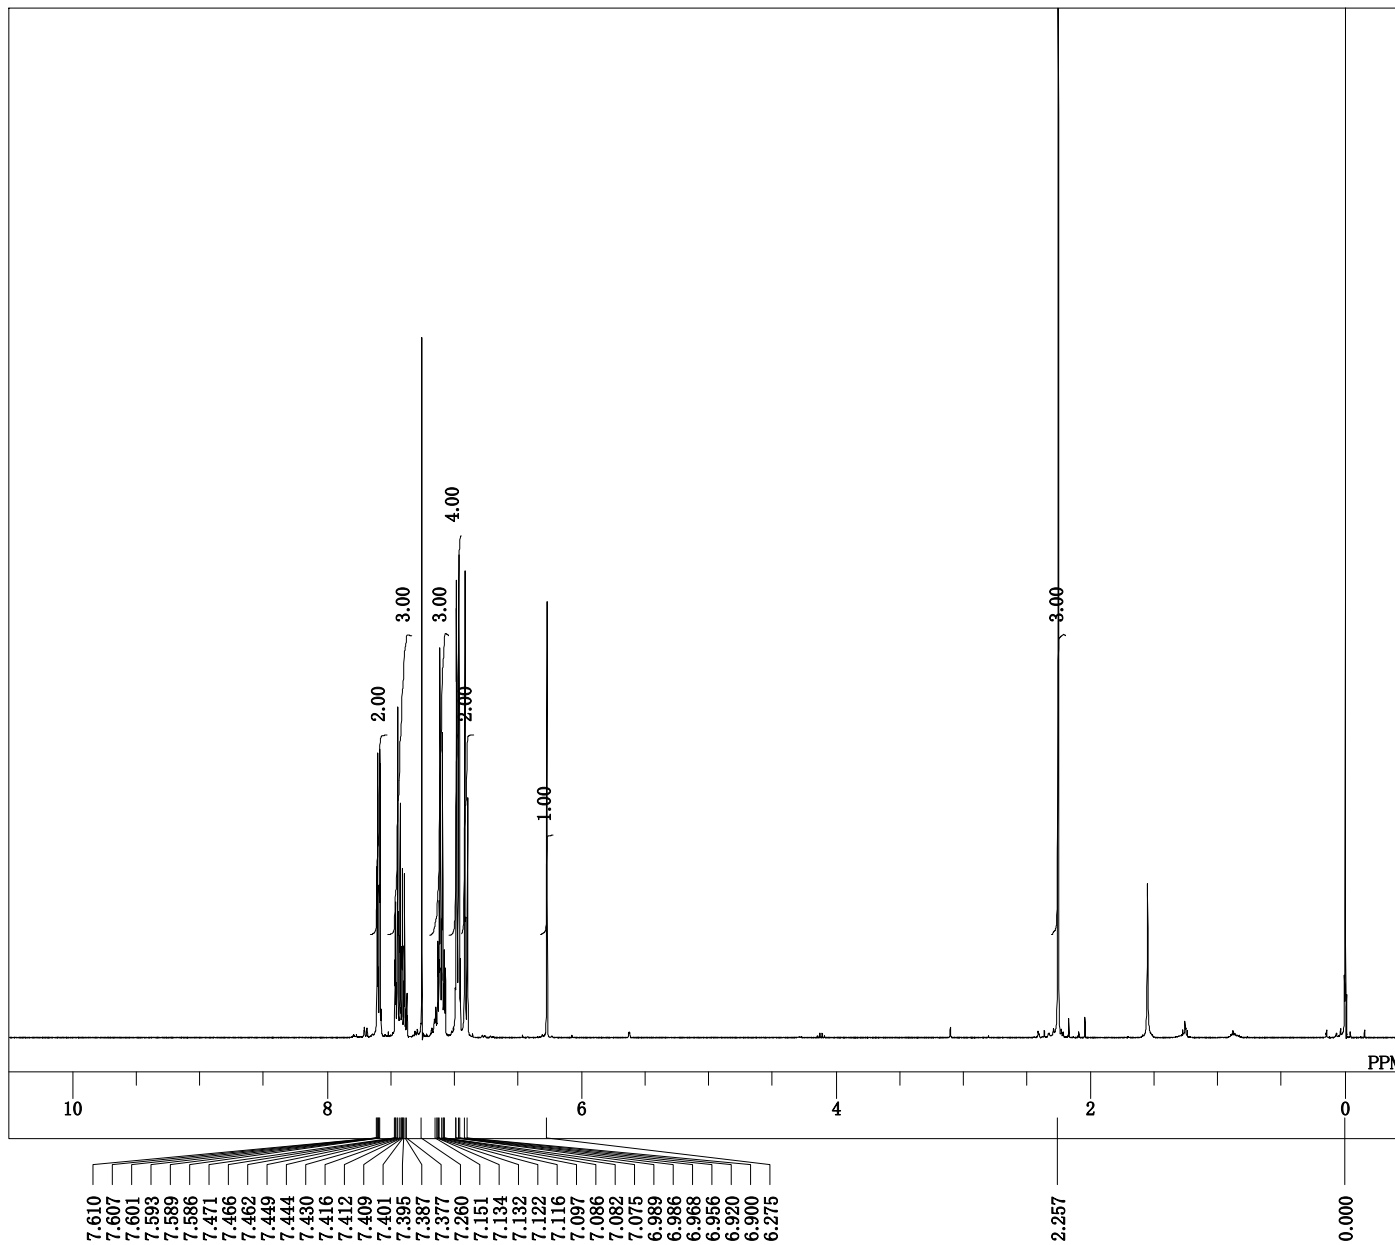

DFILE cyc\_H\_pMe\_Proton.als  
 COMNT single pulse  
 DATIM 2020-03-27 07:42:07  
 OBNUC 1H  
 EXMOD proton.jxp  
 OBFRQ 395.88 MHz  
 OBSET 6.28 KHz  
 OBFIN 0.87 Hz  
 POINT 13107  
 FREQU 5938.24 Hz  
 SCANS 8  
 ACQTM 2.2073 sec  
 PD 5.0000 sec  
 PW1 3.14 usec  
 IRNUC 1H  
 CTEMP 19.3 c  
 SLVNT CDCL3  
 EXREF 0.00 ppm  
 BF 0.12 Hz  
 RGAIN 42

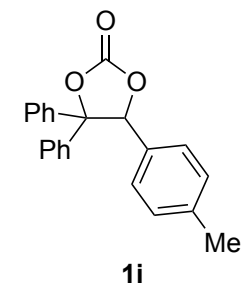

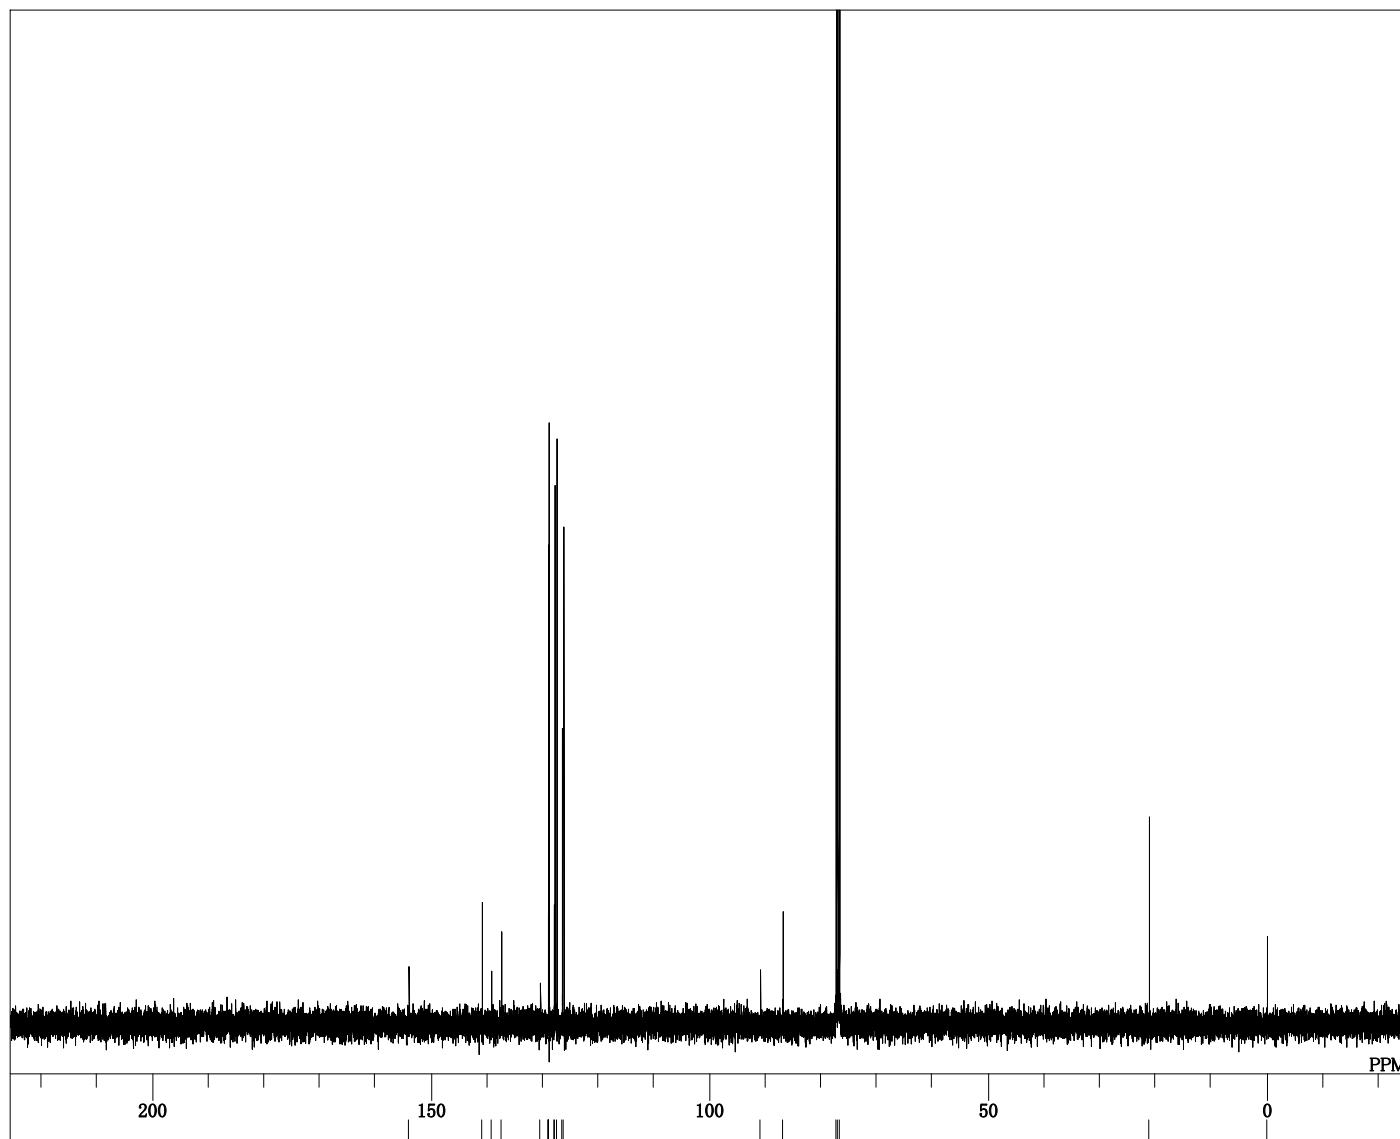

153.958  
140.833  
139.204  
137.345  
130.390  
128.962  
128.915  
128.886  
127.966  
127.803  
127.498  
126.472  
126.184

90.880  
86.876  
77.333  
77.008  
76.692

21.173

0.000

DFILE cyc\_H\_pMe\_Carbon.als  
COMNT single pulse decoupled gated NOE  
DATIM 2020-03-27 07:43:19  
OBNUC 13C  
EXMOD carbon.jxp  
OBFRQ 99.55 MHz  
OBSET 5.13 KHz  
OBFIN 0.98 Hz  
POINT 26214  
FREQU 25000.00 Hz  
SCANS 1024  
ACQTM 1.0486 sec  
PD 2.0000 sec  
PW1 3.59 usec  
IRNUC 1H  
CTEMP 19.3 c  
SLVNT CDCL3  
EXREF 0.00 ppm  
BF 0.12 Hz  
RGAIN 50

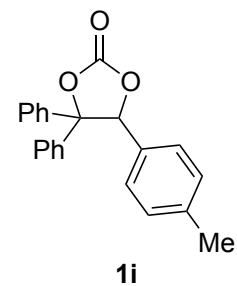

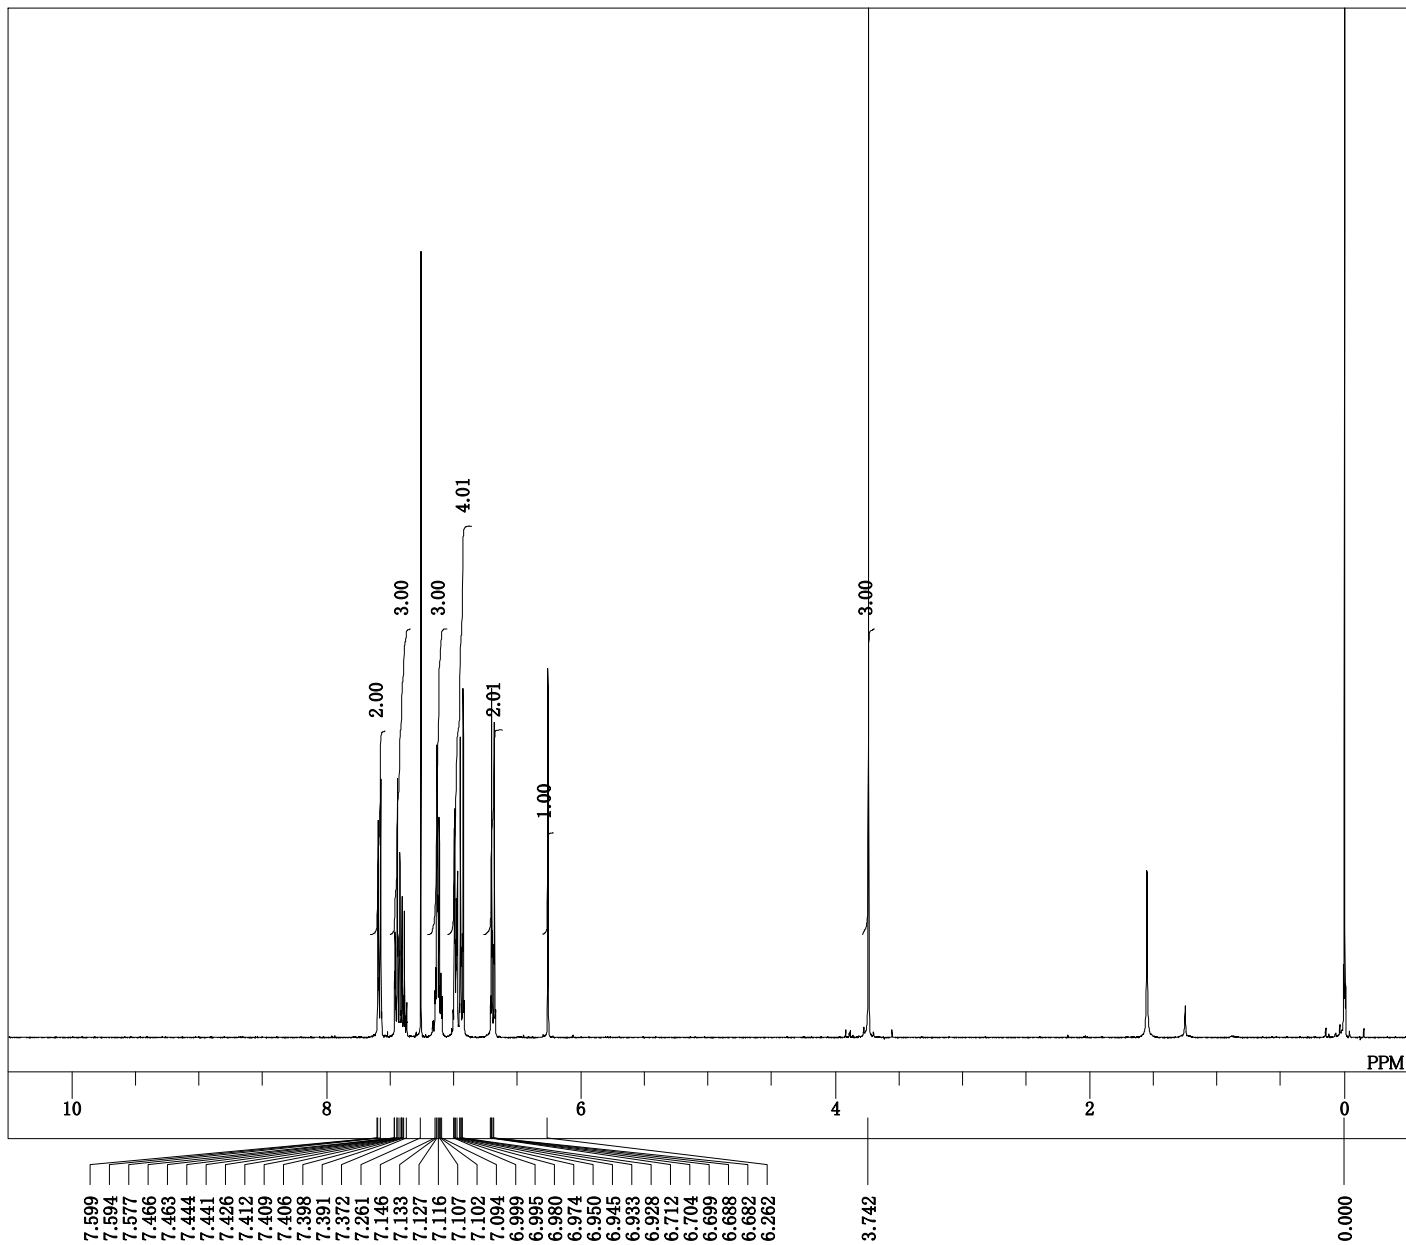

DFILE cyc\_HpOMe\_Proton.als  
 COMNT single\_pulse  
 DATIM 2020-03-27 09:13:10  
 OBNUC 1H  
 EXMOD proton.jxp  
 OBFRQ 395.88 MHz  
 OBSET 6.28 KHz  
 OBFIN 0.87 Hz  
 POINT 13107  
 FREQU 5938.24 Hz  
 SCANS 8  
 ACQTM 2.2073 sec  
 PD 5.0000 sec  
 PW1 3.14 usec  
 IRNUC 1H  
 CTEMP 19.6 c  
 SLVNT CDCL3  
 EXREF 0.00 ppm  
 BF 0.12 Hz  
 RGAIN 44

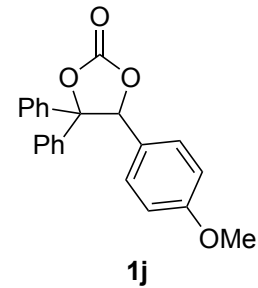

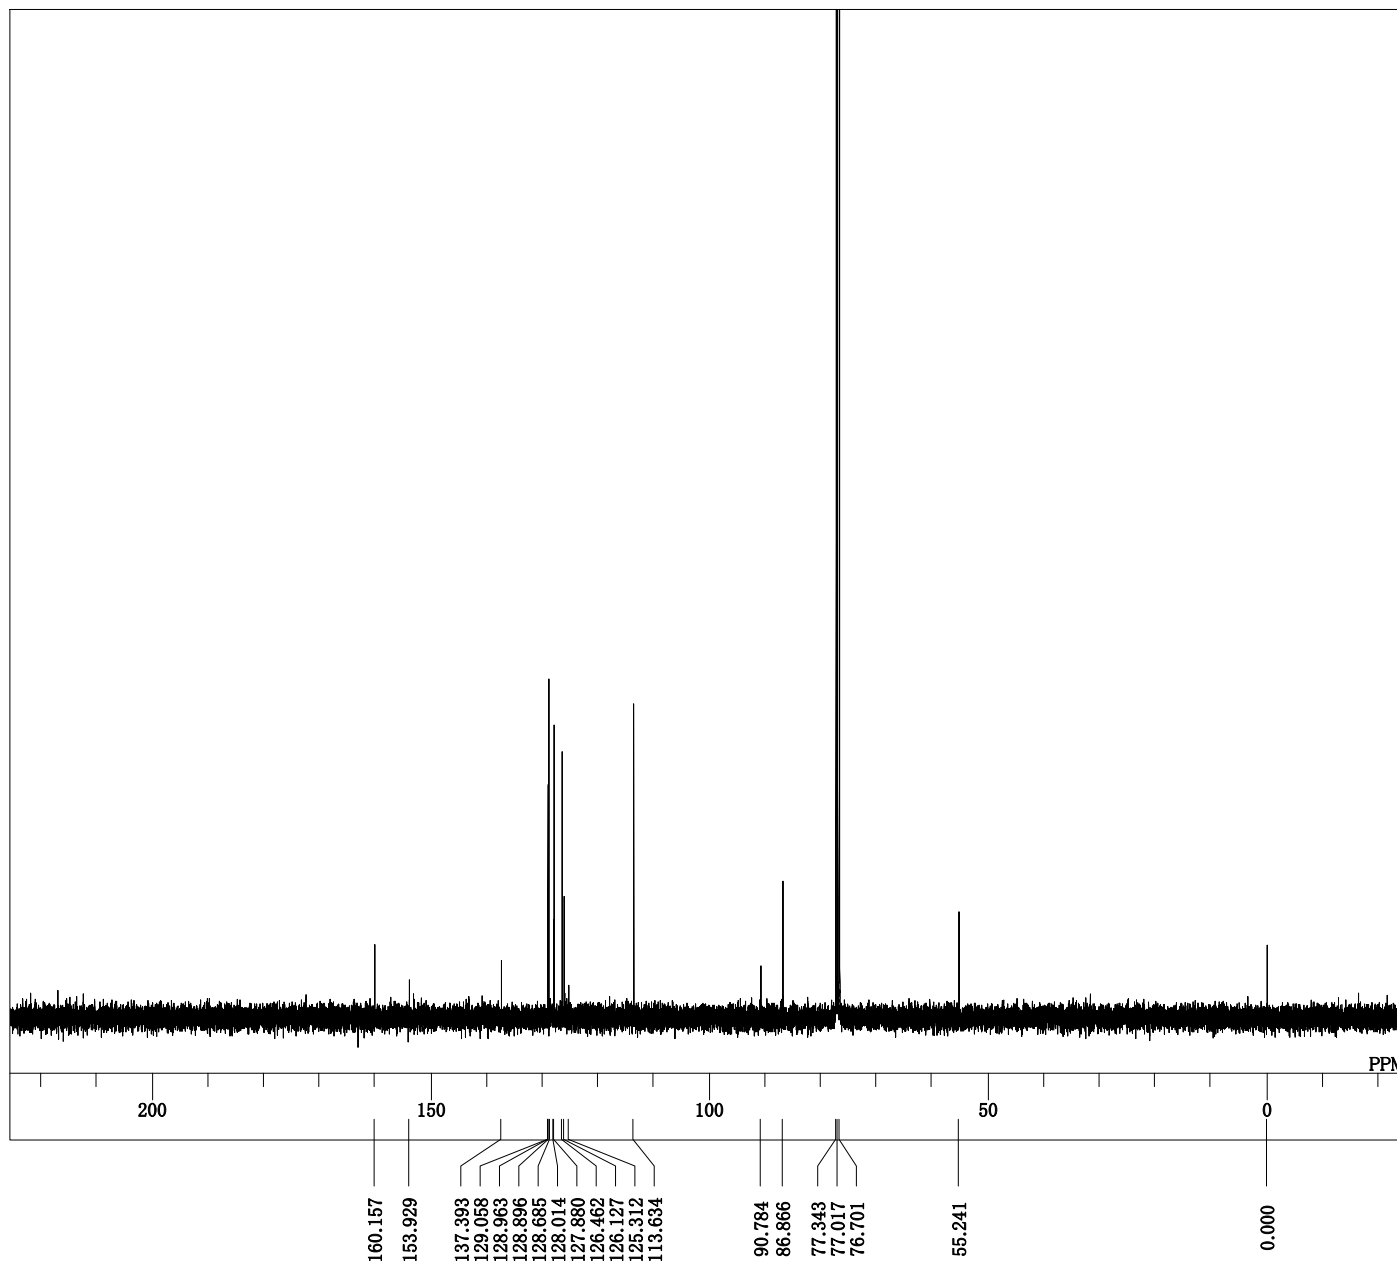

DFILE cyc\_HpOMe\_Carbon.als  
 COMNT single pulse decoupled gated NOE  
 DATIM 2020-03-27 09:14:23  
 OBNUC 13C  
 EXMOD carbon.jxp  
 OBFRQ 99.55 MHz  
 OBSET 5.13 KHz  
 OBFIN 0.98 Hz  
 POINT 26214  
 FREQU 25000.00 Hz  
 SCANS 1024  
 ACQTM 1.0486 sec  
 PD 2.0000 sec  
 PW1 3.59 usec  
 IRNUC 1H  
 CTEMP 19.8 c  
 SLVNT CDCL3  
 EXREF 0.00 ppm  
 BF 0.12 Hz  
 RGAIN 50

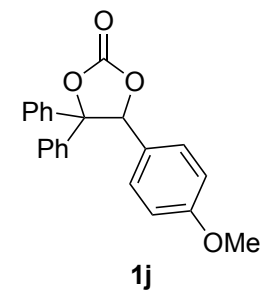

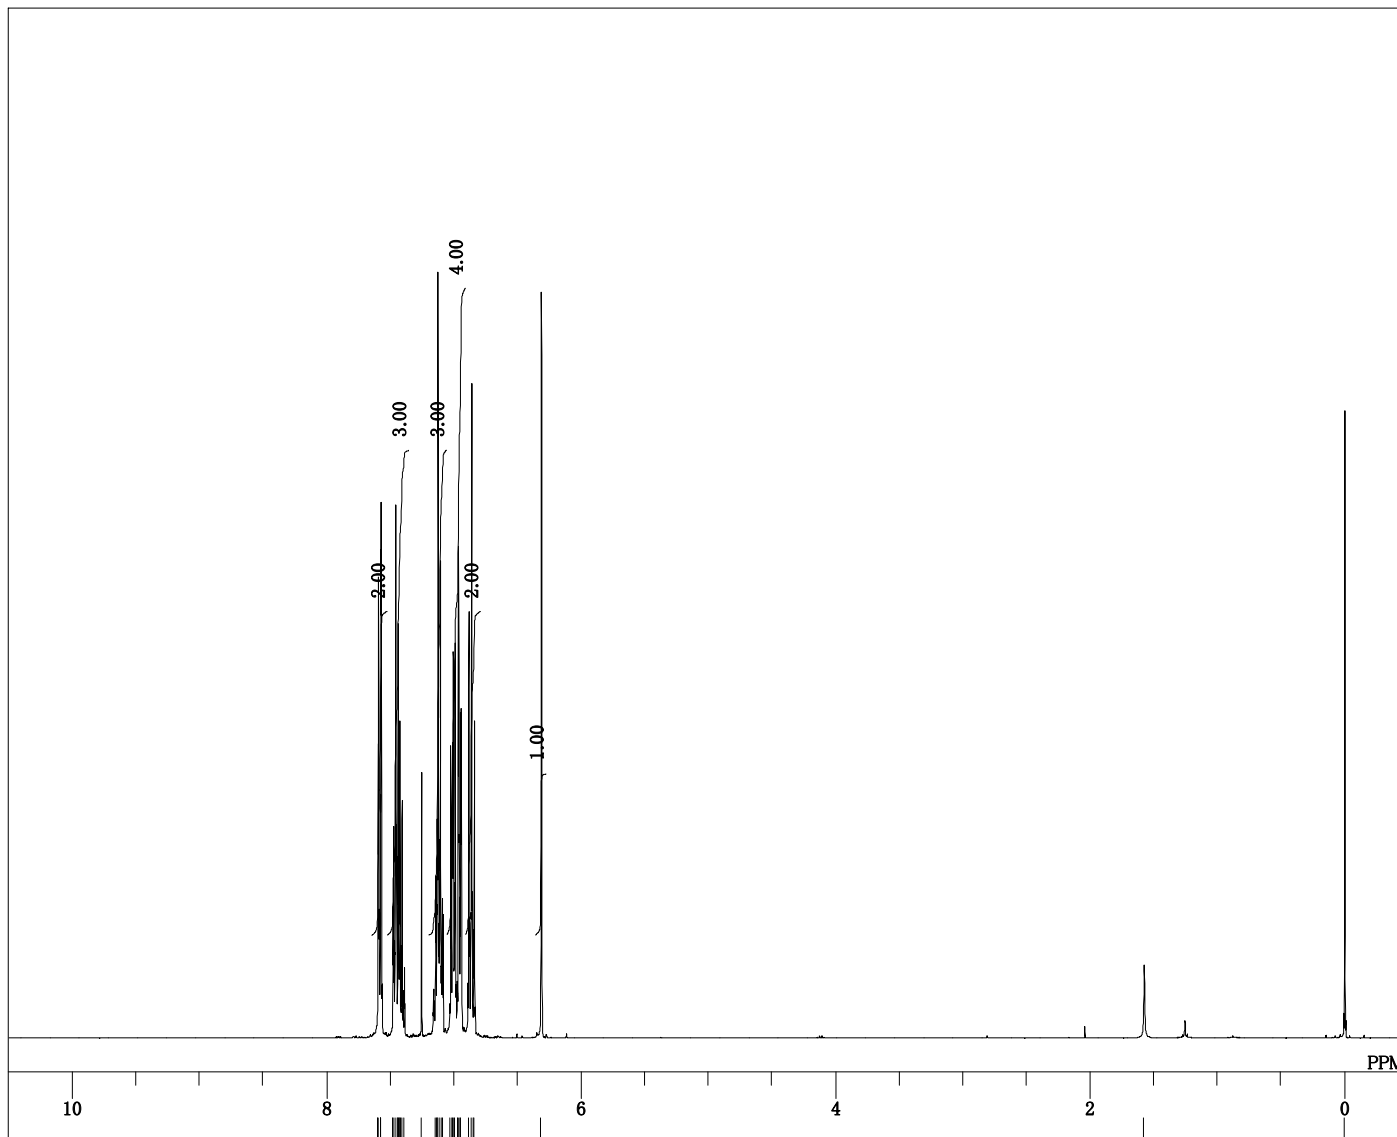

DFILE cyc\_H\_pF\_Proton.als  
 COMNT single\_pulse  
 DATIM 2020-03-28 13:41:50  
 OBNUC 1H  
 EXMOD proton.jxp  
 OBFRQ 395.88 MHz  
 OBSET 6.28 KHz  
 OBFIN 0.87 Hz  
 POINT 13107  
 FREQU 5938.24 Hz  
 SCANS 8  
 ACQTM 2.2073 sec  
 PD 5.0000 sec  
 PW1 3.14 usec  
 IRNUC 1H  
 CTEMP 20.6 c  
 SLVNT CDCL3  
 EXREF 0.00 ppm  
 BF 0.12 Hz  
 RGAIN 32

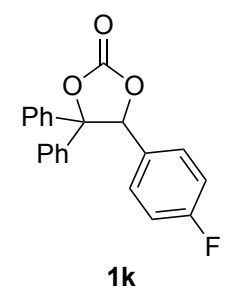

7.598  
 7.593  
 7.576  
 7.573  
 7.481  
 7.477  
 7.458  
 7.443  
 7.440  
 7.431  
 7.427  
 7.424  
 7.416  
 7.409  
 7.391  
 7.257  
 7.142  
 7.133  
 7.129  
 7.123  
 7.109  
 7.094  
 7.086  
 7.028  
 7.015  
 7.006  
 6.998  
 6.992  
 6.968  
 6.965  
 6.949  
 6.943  
 6.885  
 6.863  
 6.847  
 6.841  
 6.315

1.576

0.000

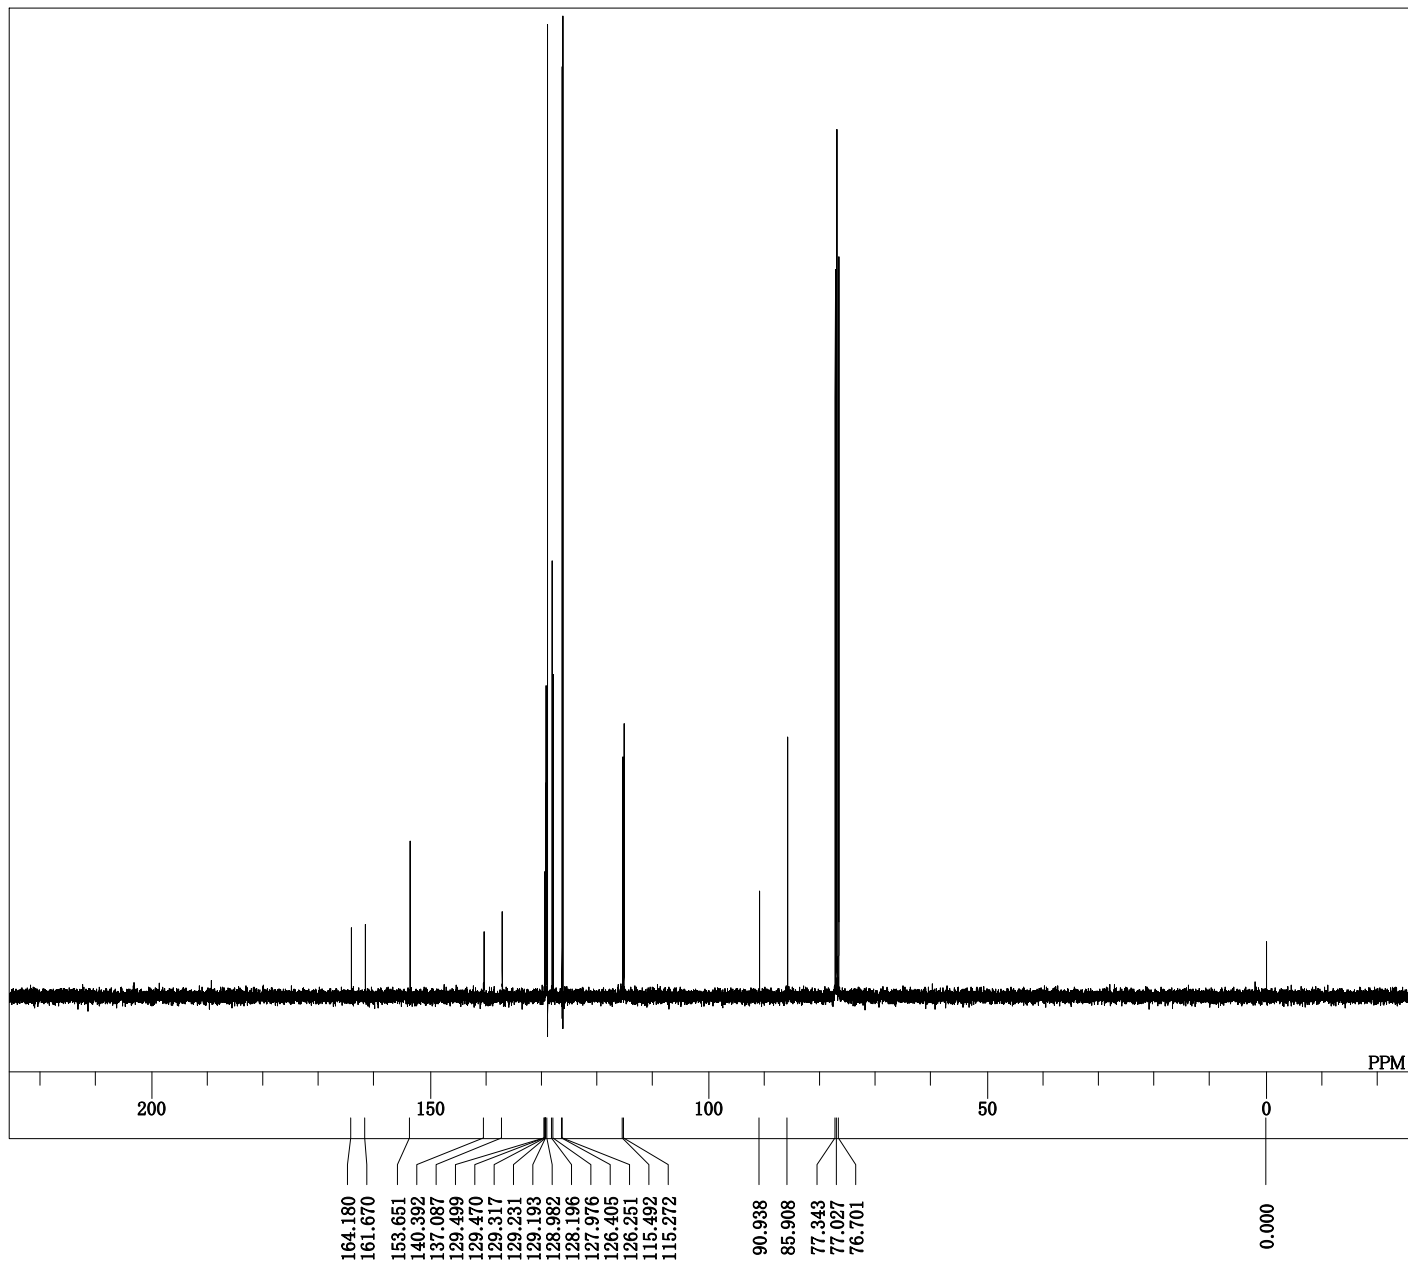

DFILE cyc\_H\_pF\_Carbon.als  
 COMNT single pulse decoupled gated NOE  
 DATIM 2020-03-28 13:43:03  
 OBNUC 13C  
 EXMOD carbon.jxp  
 OBFRQ 99.55 MHz  
 OBSET 5.13 KHz  
 OBFIN 0.98 Hz  
 POINT 26214  
 FREQU 25000.00 Hz  
 SCANS 1024  
 ACQTM 1.0486 sec  
 PD 2.0000 sec  
 PW1 3.59 usec  
 IRNUC 1H  
 CTEMP 20.8 c  
 SLVNT CDCL3  
 EXREF 0.00 ppm  
 BF 0.12 Hz  
 RGAIN 50

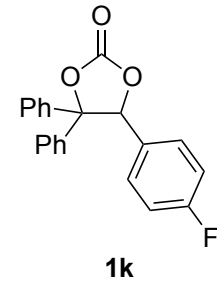

DFILE cyc\_H\_pF\_Fluorine.als  
COMNT single\_pulse  
DATIM 2022-07-04 21:30:06  
OBNUC 19F  
EXMOD single\_pulse.jxp  
OBFRQ 372.50 MHz  
OBSET 3.36 KHz  
OBFIN 6.86 Hz  
POINT 26214  
FREQU 149253.73 Hz  
SCANS 4  
ACQTM 0.1756 sec  
PD 10.0000 sec  
PW1 3.98 usec  
IRNUC 19F  
CTEMP 20.3 c  
SLVNT CDCL3  
EXREF -163.00 ppm  
BF 0.12 Hz  
RGAIN 42

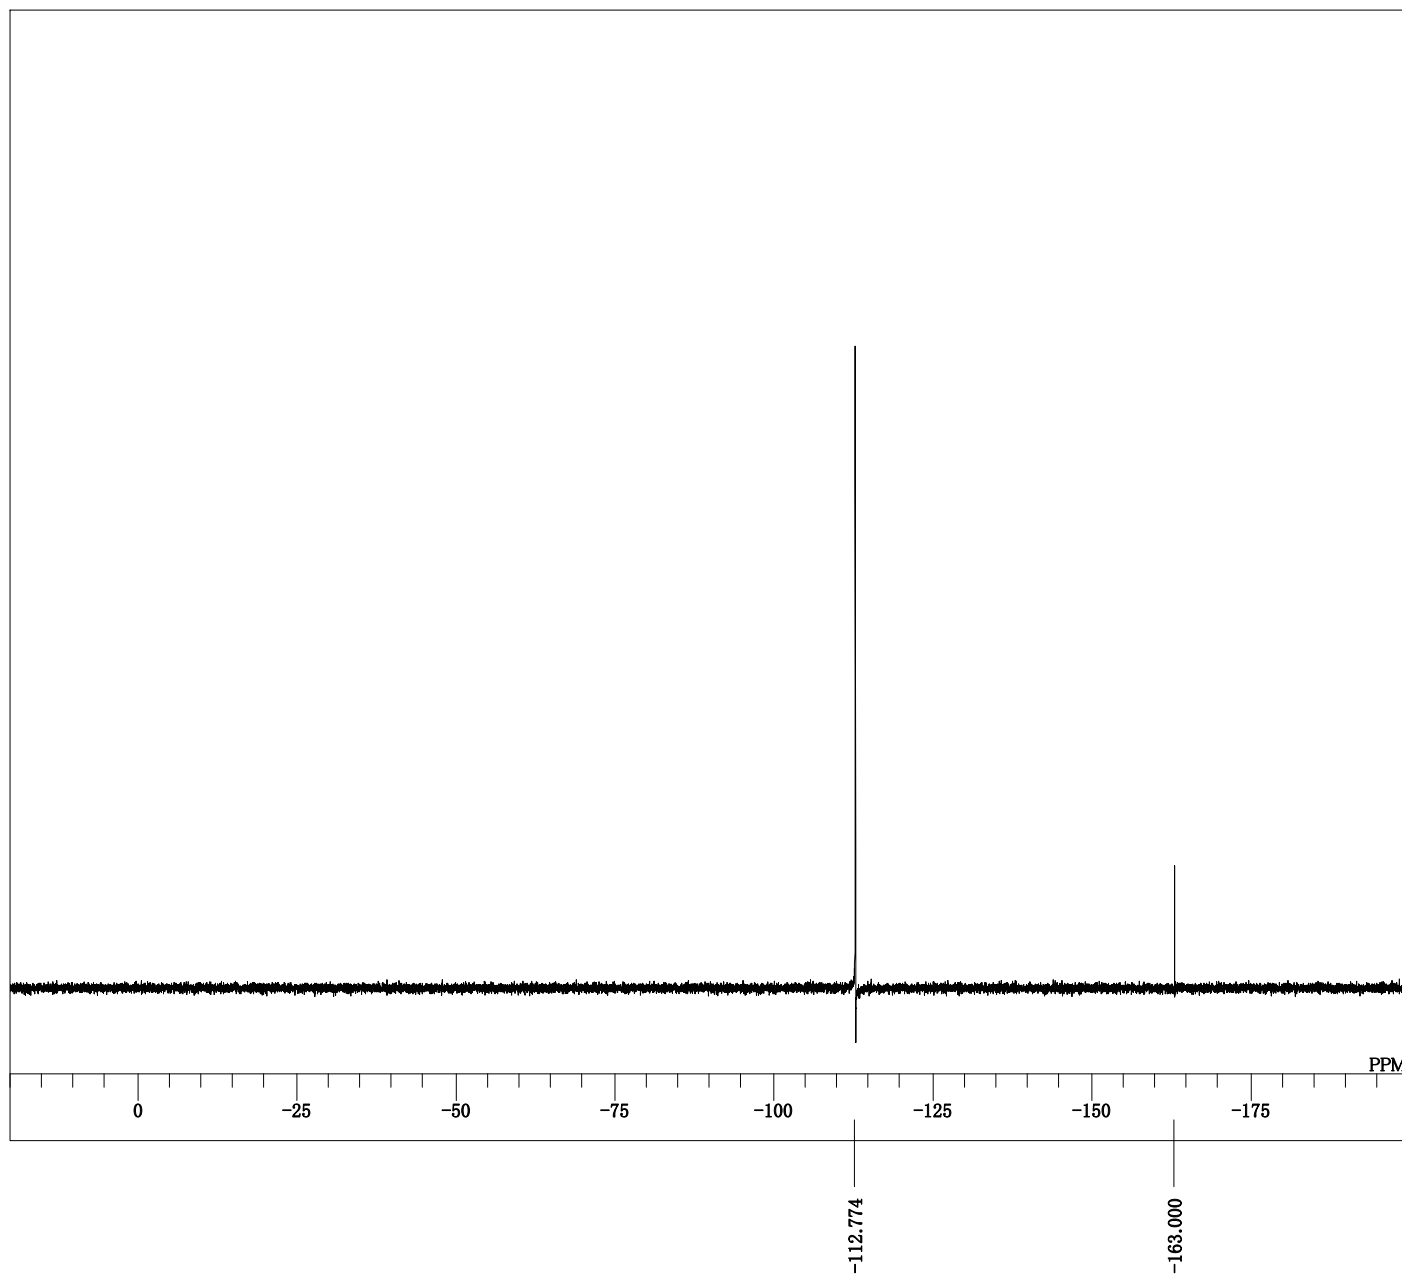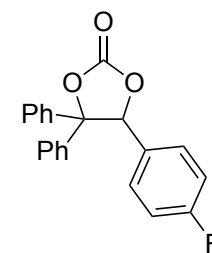

1k



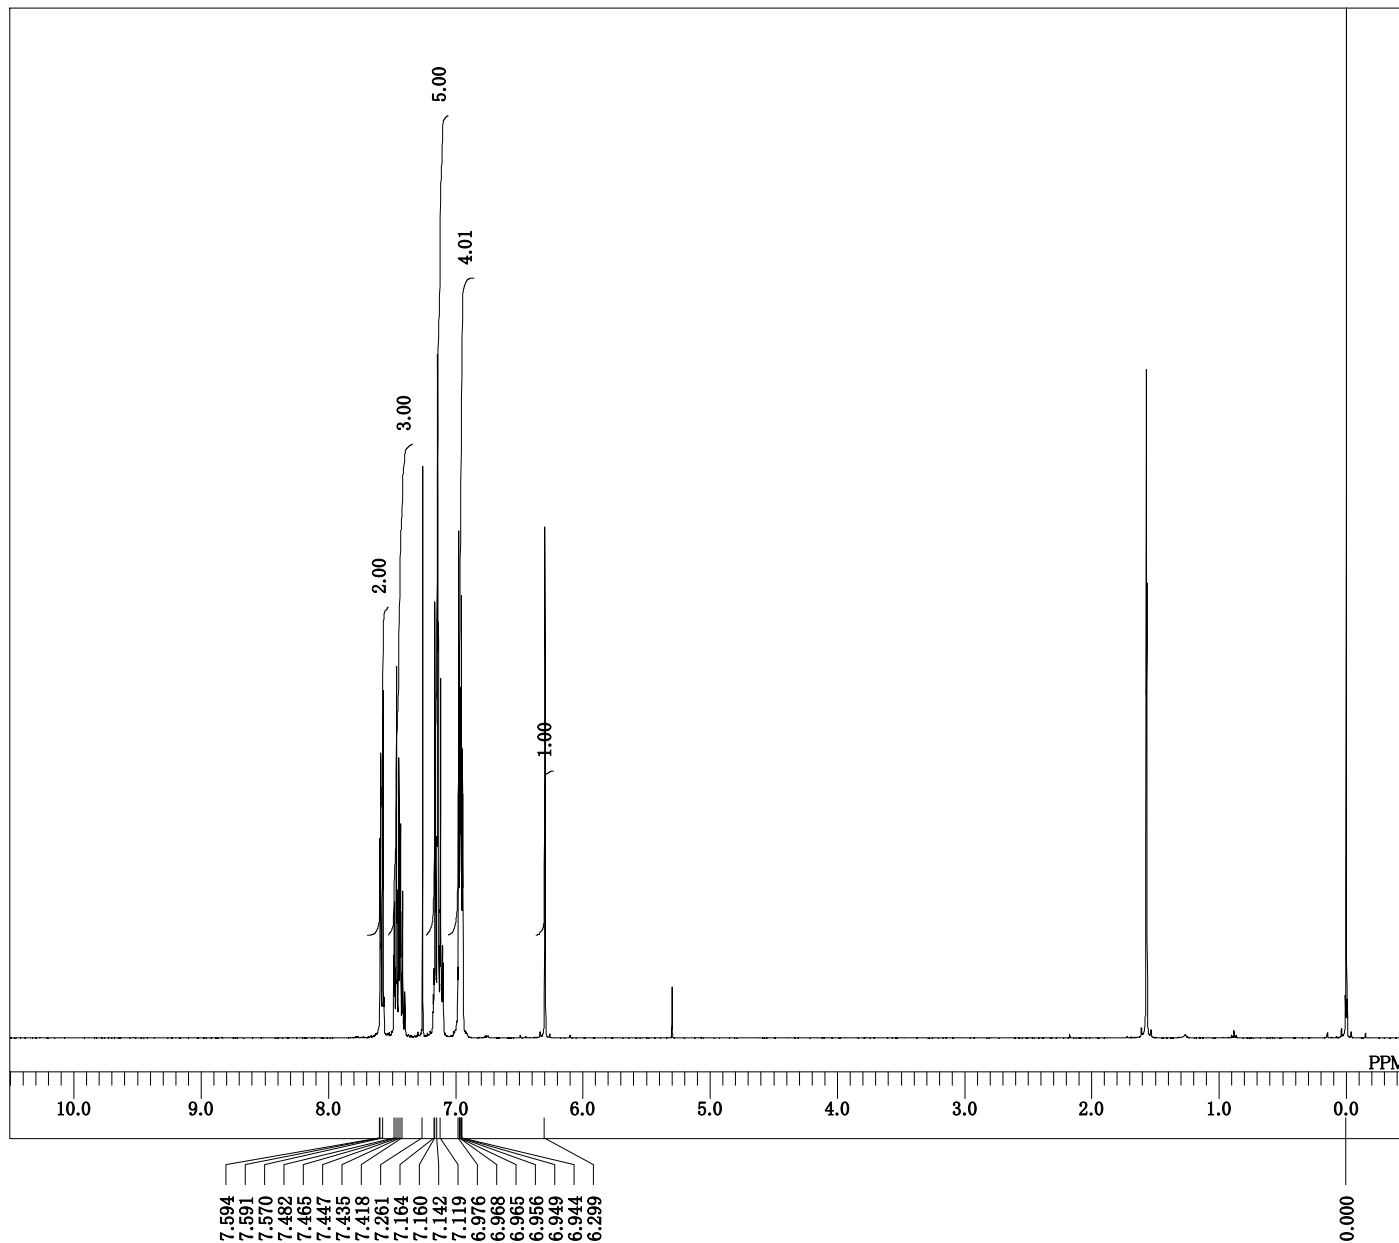

DFILE cyc\_H\_pClProton.als  
 COMNT single\_pulse  
 DATIM 2020-06-08 18:55:55  
 OBNUC 1H  
 EXMOD proton\_jxp  
 OBFRQ 395.88 MHz  
 OBSET 6.28 KHz  
 OBFIN 0.87 Hz  
 POINT 13107  
 FREQU 5938.24 Hz  
 SCANS 8  
 ACQTM 2.2073 sec  
 PD 5.0000 sec  
 PW1 3.14 usec  
 IRNUC 1H  
 CTEMP 20.6 c  
 SLVNT CDCL3  
 EXREF 0.00 ppm  
 BF 0.12 Hz  
 RGAIN 42

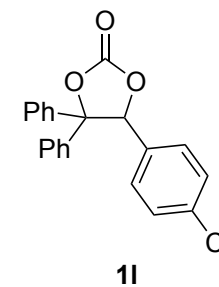

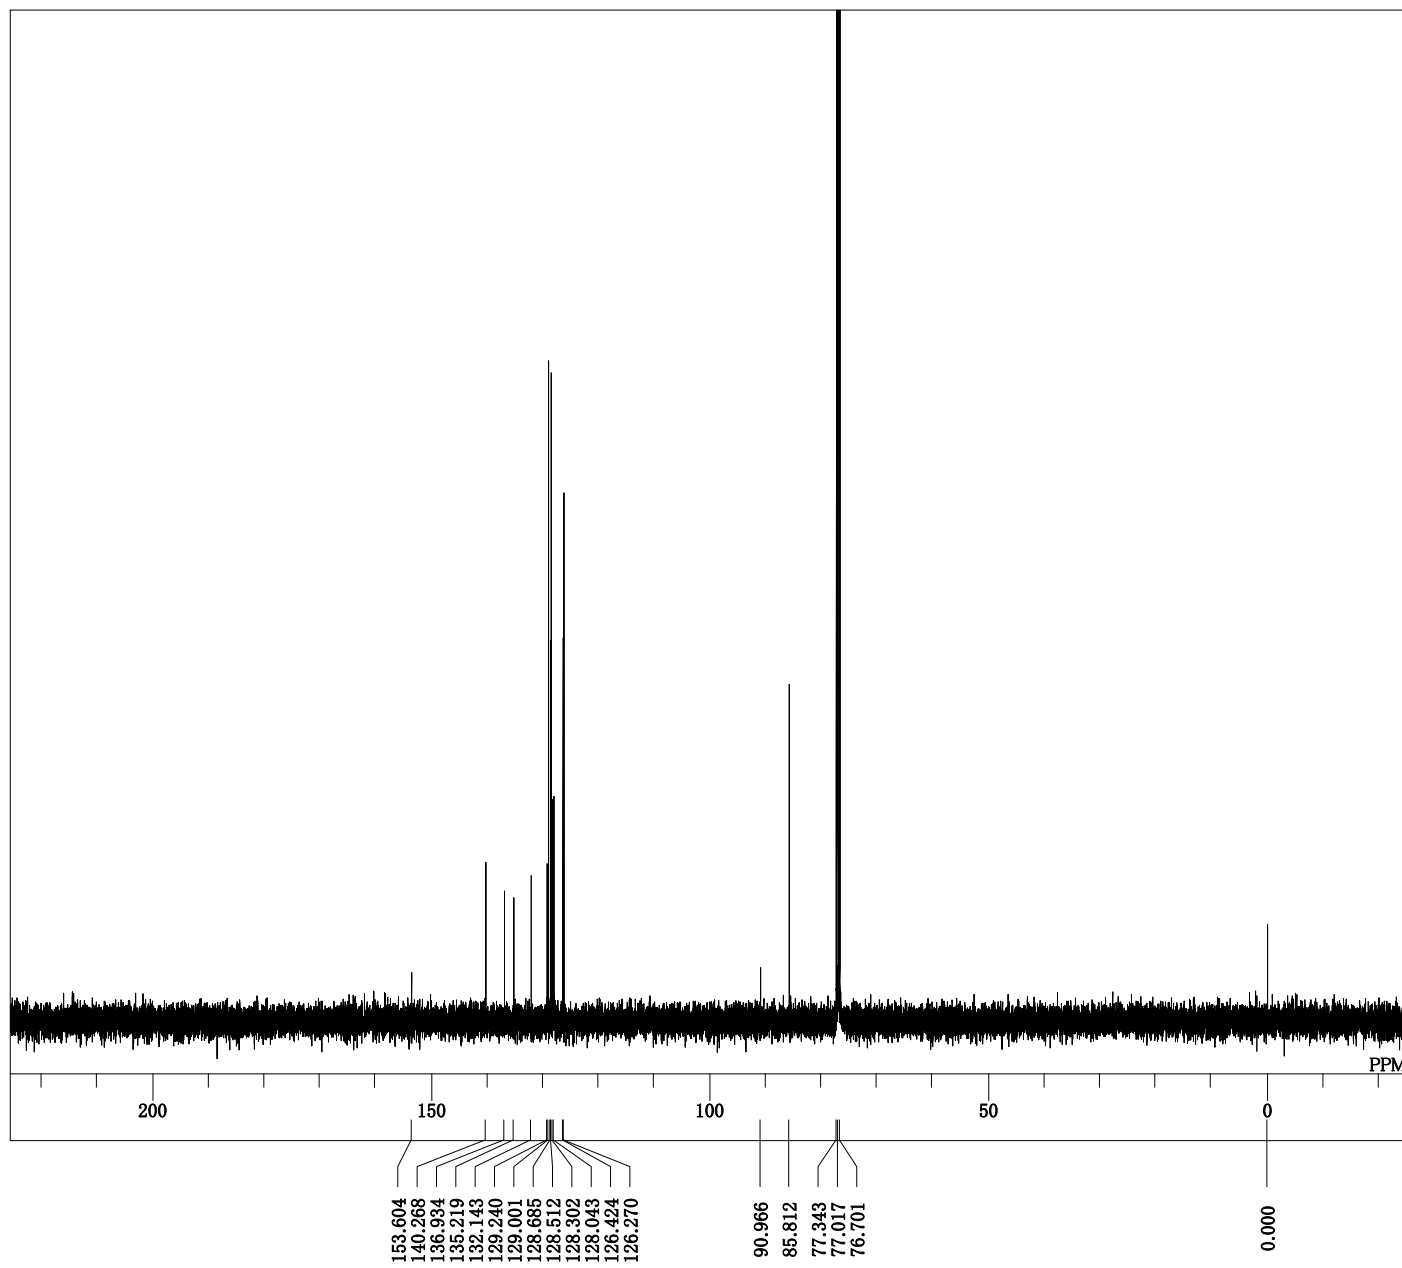

DFILE cyc\_H\_pClCarbon.als  
 COMNT single pulse decoupled gated NOE  
 DATIM 2020-06-09 10:25:13  
 OBNUC 13C  
 EXMOD carbon.jxp  
 OBFRQ 99.55 MHz  
 OBSET 5.13 KHz  
 OBFIN 0.98 Hz  
 POINT 26214  
 FREQU 25000.00 Hz  
 SCANS 648  
 ACQTM 1.0486 sec  
 PD 2.0000 sec  
 PW1 3.59 usec  
 IRNUC 1H  
 CTEMP 20.9 c  
 SLVNT CDCL3  
 EXREF 0.00 ppm  
 BF 0.12 Hz  
 RGAIN 50

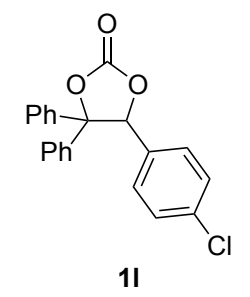

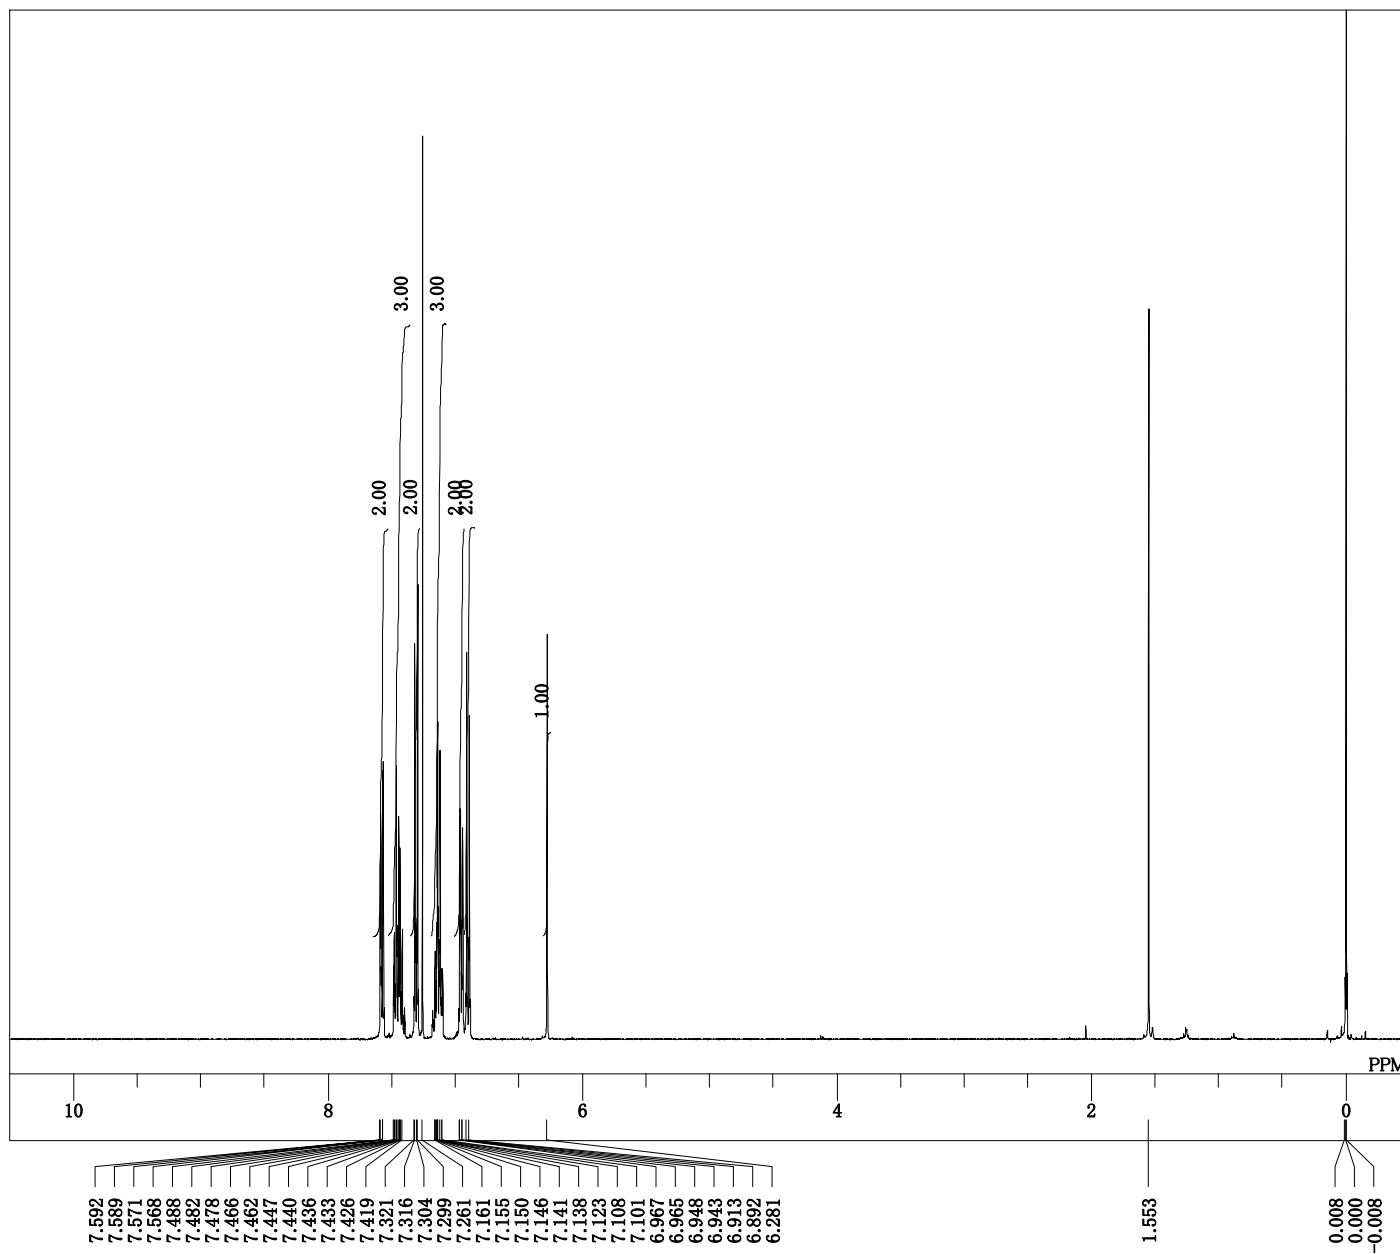

DFILE cyc\_H\_pBr\_Proton.als  
 COMNT single\_pulse  
 DATIM 2020-03-28 14:46:35  
 OBNUC 1H  
 EXMOD proton.jxp  
 OBFRQ 395.88 MHz  
 OBSET 6.28 KHz  
 OBFIN 0.87 Hz  
 POINT 13107  
 FREQU 5938.24 Hz  
 SCANS 8  
 ACQTM 2.2073 sec  
 PD 5.0000 sec  
 PW1 3.14 usec  
 IRNUC 1H  
 CTEMP 20.7 c  
 SLVNT CDCL3  
 EXREF 0.00 ppm  
 BF 0.12 Hz  
 RGAIN 44

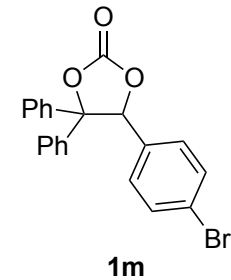

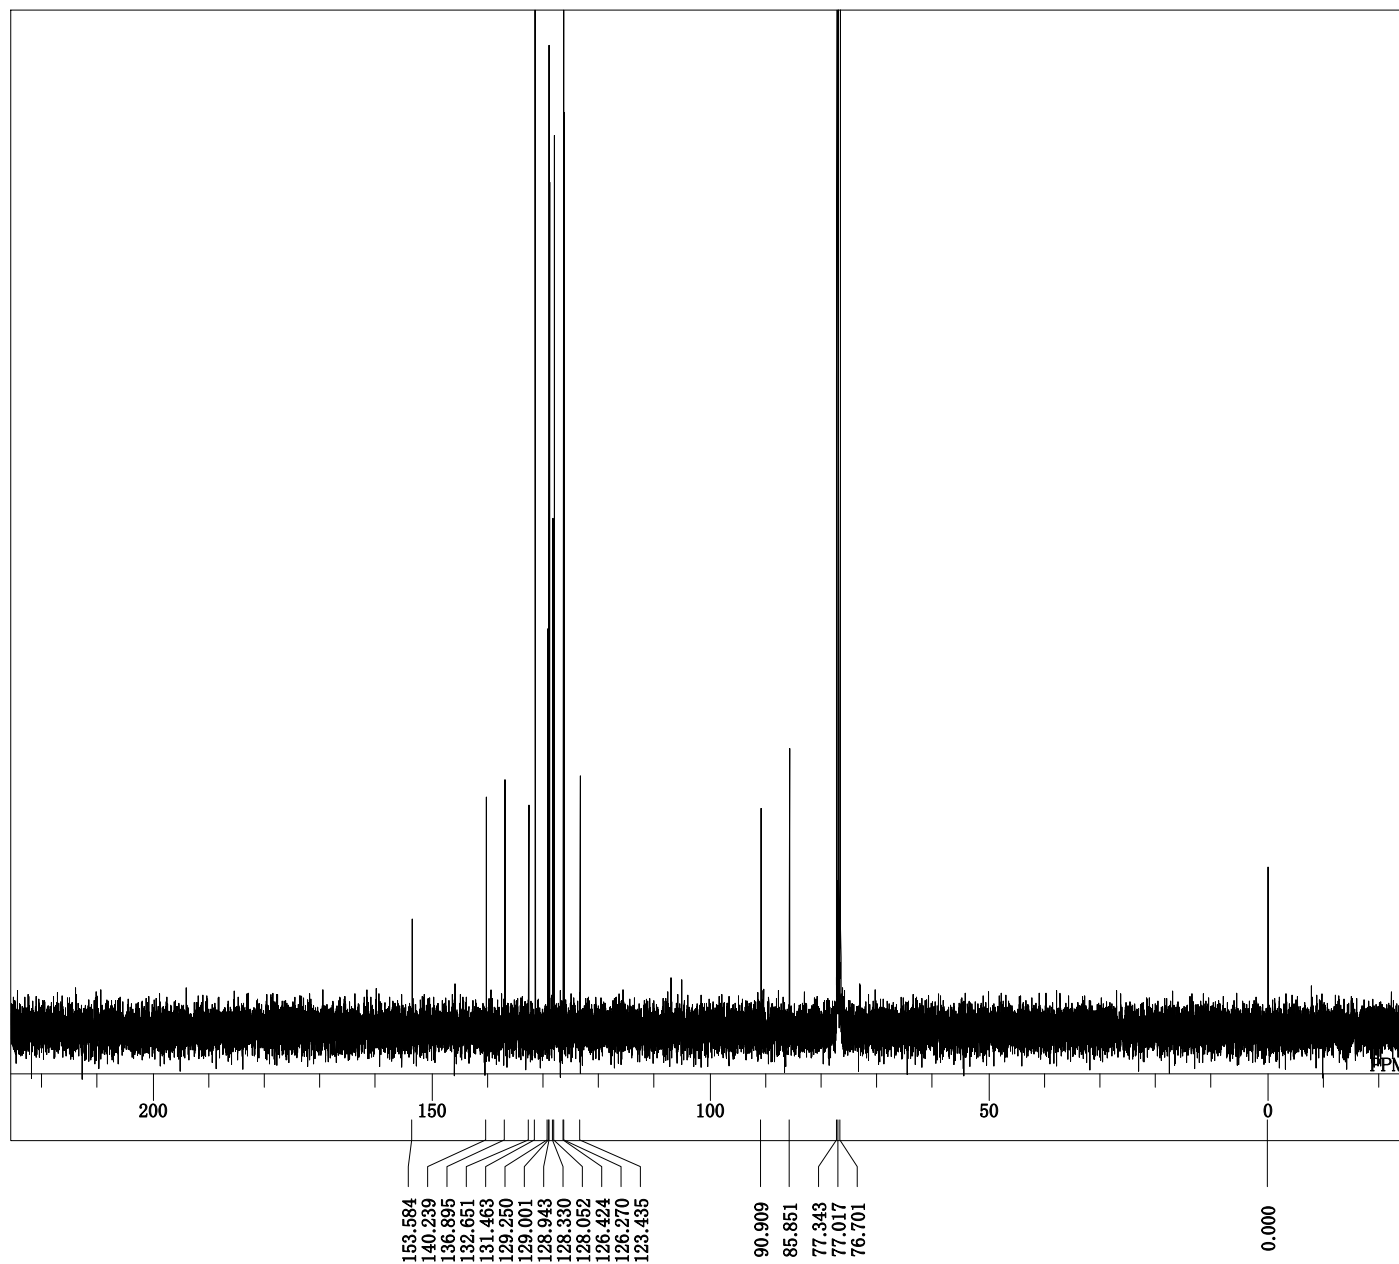

DFILE cyc\_H\_pBr\_Carbon.als  
 COMNT single pulse decoupled gated NOE  
 DATIM 2020-03-30 08:34:47  
 OBNUC 13C  
 EXMOD carbon.jxp  
 OBFRQ 99.55 MHz  
 OBSET 5.13 KHz  
 OBFIN 0.98 Hz  
 POINT 26214  
 FREQU 25000.00 Hz  
 SCANS 2048  
 ACQTM 1.0486 sec  
 PD 2.0000 sec  
 PW1 3.59 usec  
 IRNUC 1H  
 CTEMP 20.8 c  
 SLVNT CDCL3  
 EXREF 0.00 ppm  
 BF 0.12 Hz  
 RGAIN 50

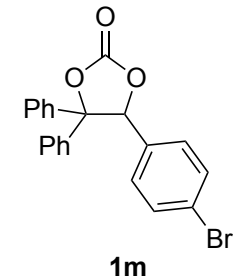

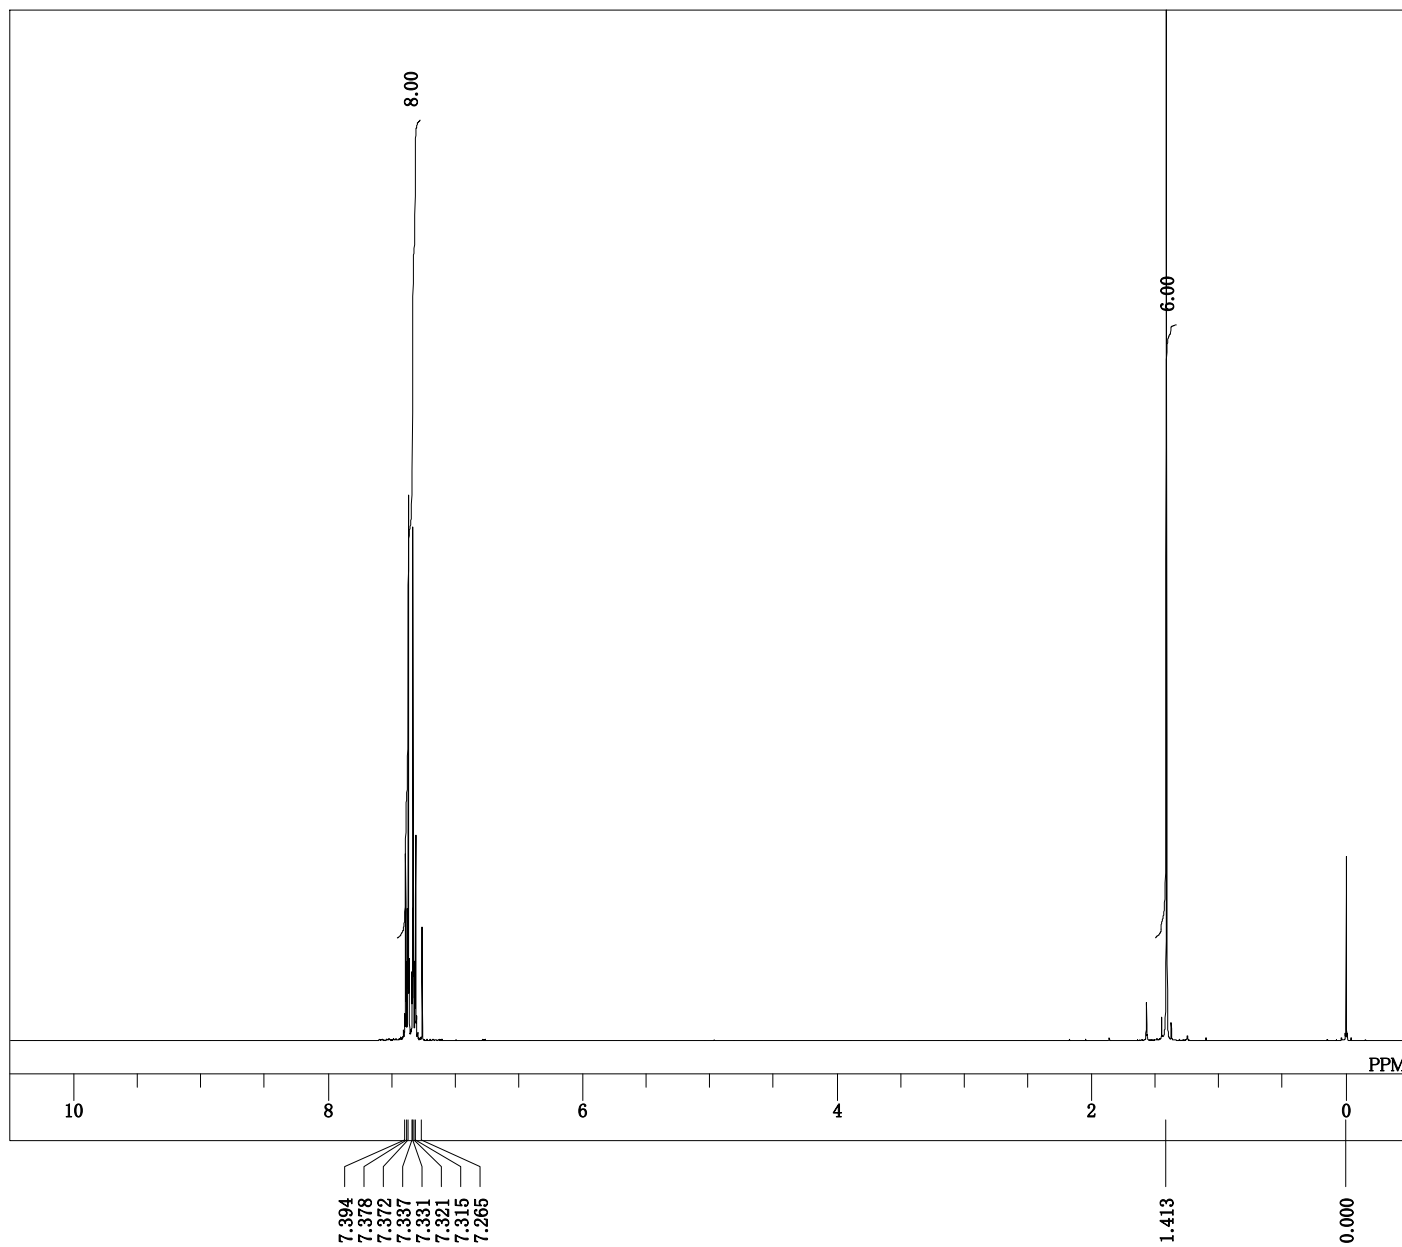

DFILE cyc\_pClpClMeMe\_Proton.als  
 COMNT single\_pulse  
 DATIM 2020-11-25 00:32:07  
 OBNUC 1H  
 EXMOD proton.jxp  
 OBFRQ 395.88 MHz  
 OBSET 6.28 KHz  
 OBFIN 0.87 Hz  
 POINT 13107  
 FREQU 5938.24 Hz  
 SCANS 8  
 ACQTM 2.2073 sec  
 PD 5.0000 sec  
 PW1 3.14 usec  
 IRNUC 1H  
 CTEMP 18.9 c  
 SLVNT CDCL3  
 EXREF 0.00 ppm  
 BF 0.12 Hz  
 RGAIN 38

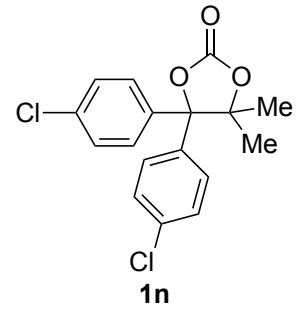

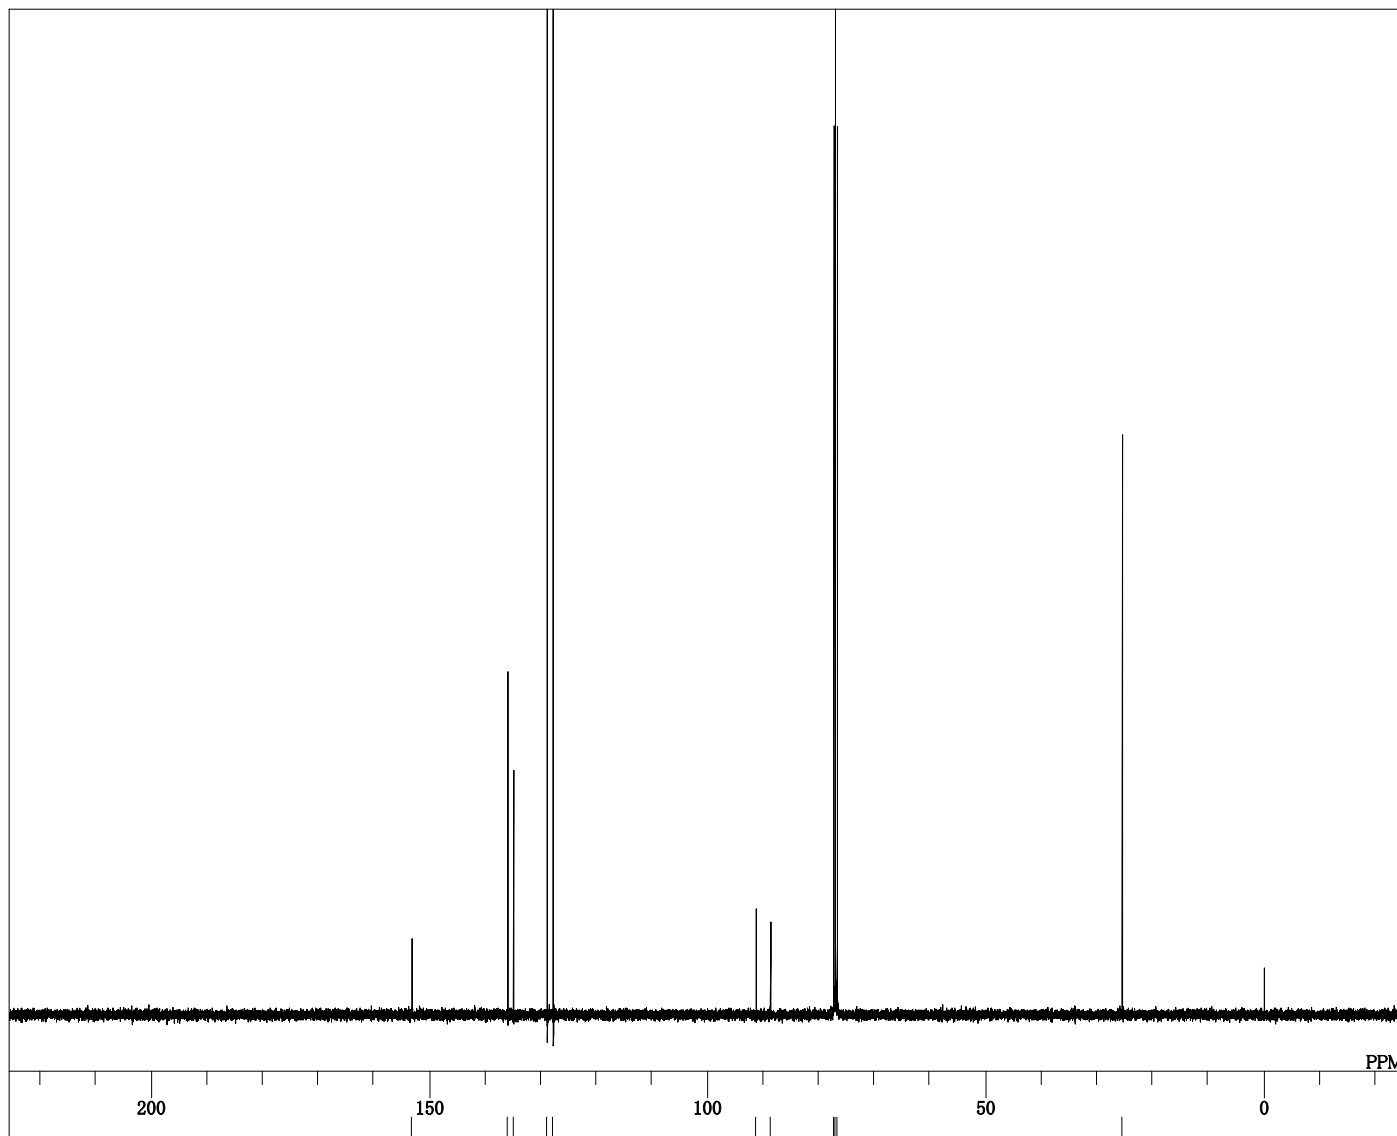

DFILE cyc\_pClpCl\_MeMe\_Carbon.als  
 COMNT single pulse decoupled gated NOE  
 DATIM 2020-11-25 00:33:20  
 OBNUC 13C  
 EXMOD carbon.jxp  
 OBFRQ 99.55 MHz  
 OBSET 5.13 KHz  
 OBFIN 0.98 Hz  
 POINT 32767  
 FREQU 31250.00 Hz  
 SCANS 2144  
 ACQTM 1.0486 sec  
 PD 2.0000 sec  
 PW1 3.59 usec  
 IRNUC 1H  
 CTEMP 18.8 c  
 SLVNT CDCL3  
 EXREF 0.00 ppm  
 BF 0.12 Hz  
 RGAIN 50

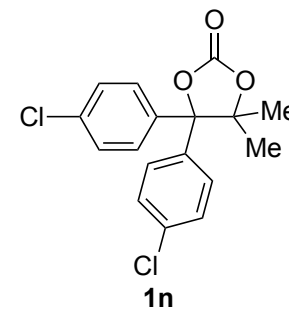

DFILE cyc\_pBrpBr\_MeMe\_Proton.als  
 COMNT single\_pulse  
 DATIM 2020-12-02 09:22:38  
 OBNUC 1H  
 EXMOD proton.jxp  
 OBFRQ 395.88 MHz  
 OBSET 6.28 KHz  
 OBFIN 0.87 Hz  
 POINT 16384  
 FREQU 7422.80 Hz  
 SCANS 8  
 ACQTM 2.2073 sec  
 PD 5.0000 sec  
 PW1 3.14 usec  
 IRNUC 1H  
 CTEMP 18.9 c  
 SLVNT CDCL3  
 EXREF 0.00 ppm  
 BF 0.12 Hz  
 RGAIN 40

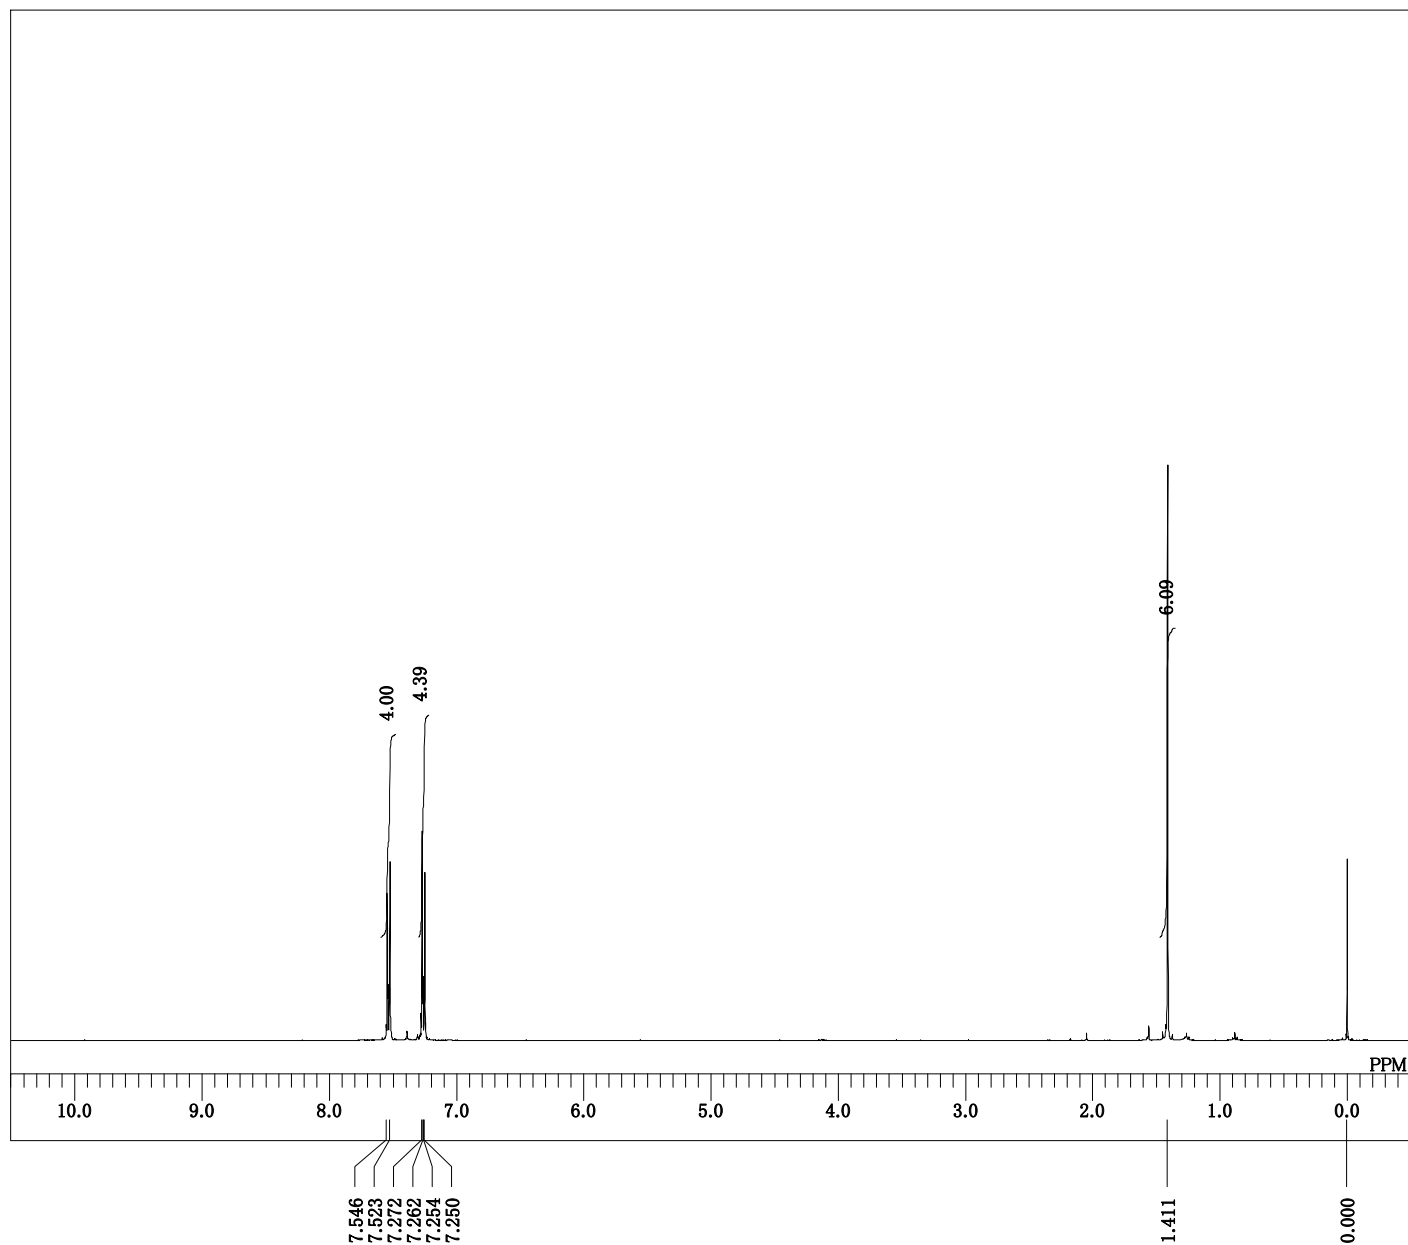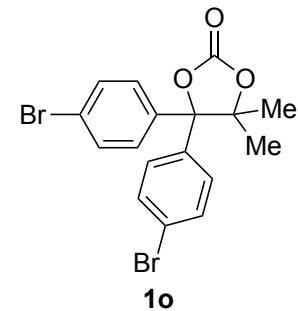

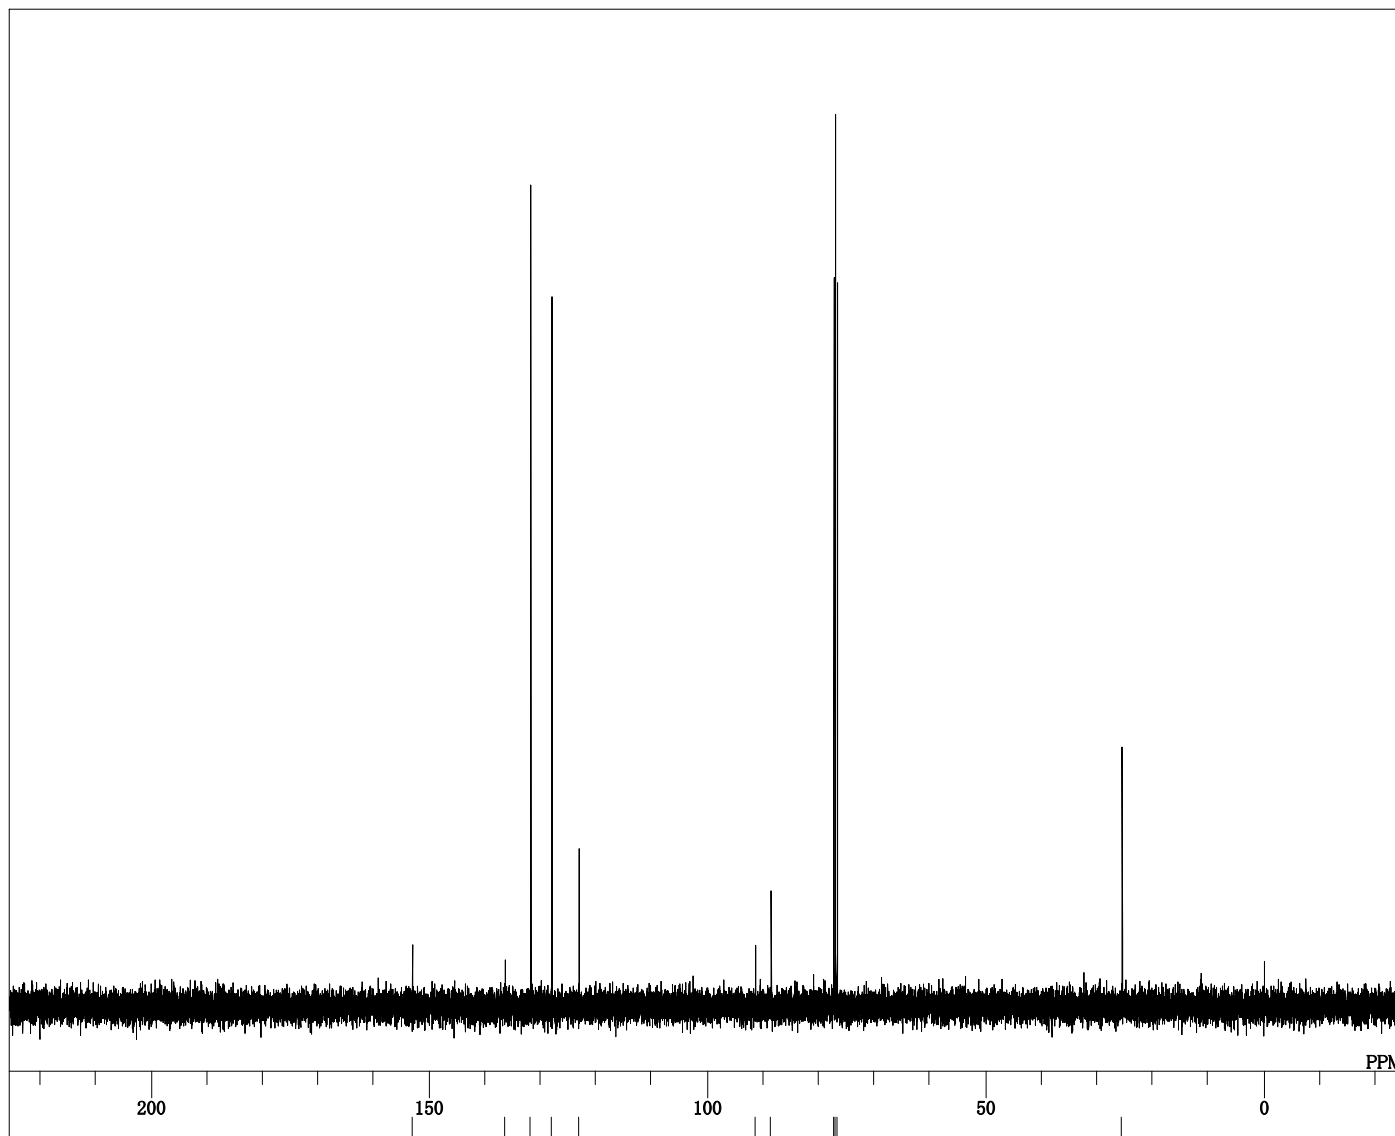

DFILE cyc\_pBrpBr\_MeMe\_Carbon.als  
 COMNT single pulse decoupled gated NOE  
 DATIM 2020-12-02 09:23:51  
 OBNUC <sup>13</sup>C  
 EXMOD carbon.jxp  
 OBFREQ 99.55 MHz  
 OBSET 5.13 KHz  
 OBFIN 0.98 Hz  
 POINT 26214  
 FREQU 25000.00 Hz  
 SCANS 128  
 ACQTM 1.0486 sec  
 PD 2.0000 sec  
 PW1 3.59 usec  
 IRNUC 1H  
 CTEMP 18.6 c  
 SLVNT CDCL3  
 EXREF 77.00 ppm  
 BF 0.12 Hz  
 RGAIN 50



153.098

136.380

131.800

128.006

123.101

91.361

88.583

77.326

77.000

76.684

25.505



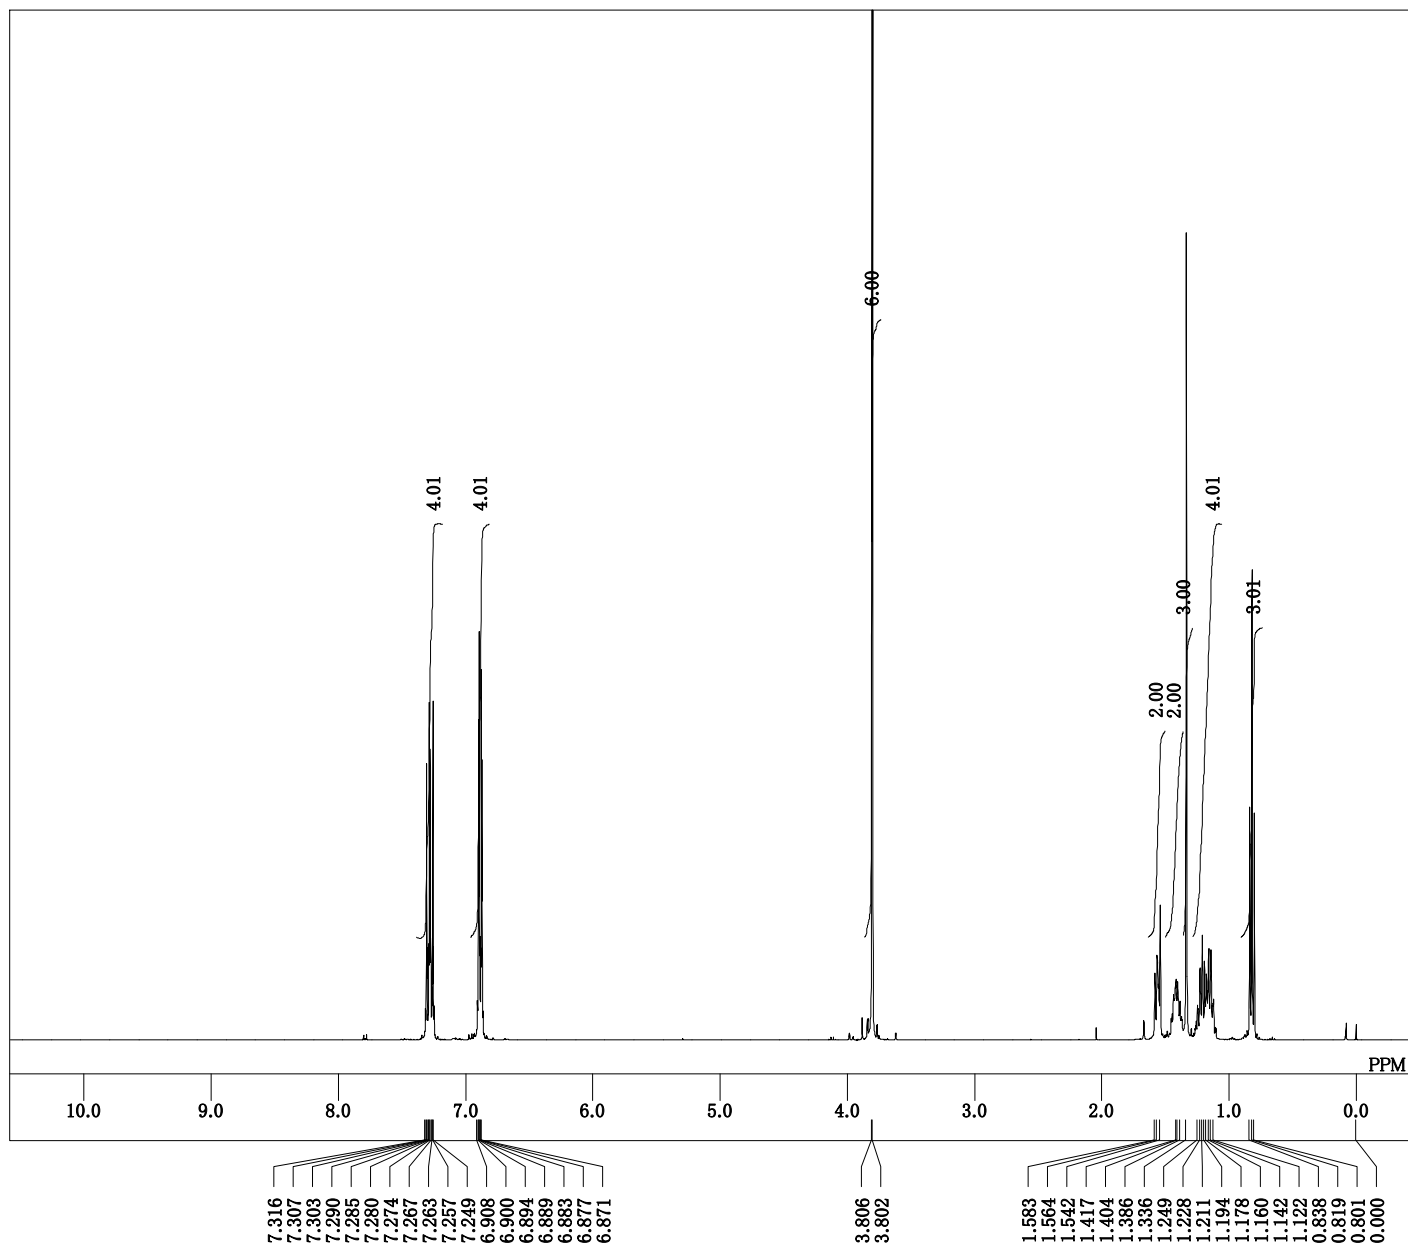

DFILE cyc\_PMPPMP\_MenPentan\_Proton.al  
 COMNT single\_pulse  
 DATIM 2020-10-09 09:47:57  
 OBNUC 1H  
 EXMOD proton.jp  
 OBFRQ 395.88 MHz  
 OBSET 6.28 KHz  
 OBFIN 0.87 Hz  
 POINT 13107  
 FREQU 5938.24 Hz  
 SCANS 8  
 ACQTM 2.2073 sec  
 PD 5.0000 sec  
 PW1 3.14 usec  
 IRNUC 1H  
 CTEMP 20.5 c  
 SLVNT CDCL3  
 EXREF 0.00 ppm  
 BF 0.12 Hz  
 RGAIN 22

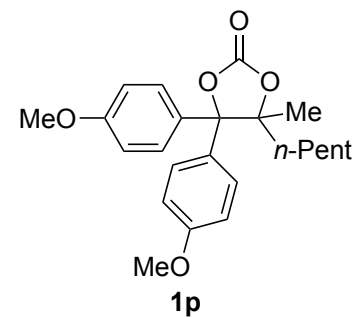

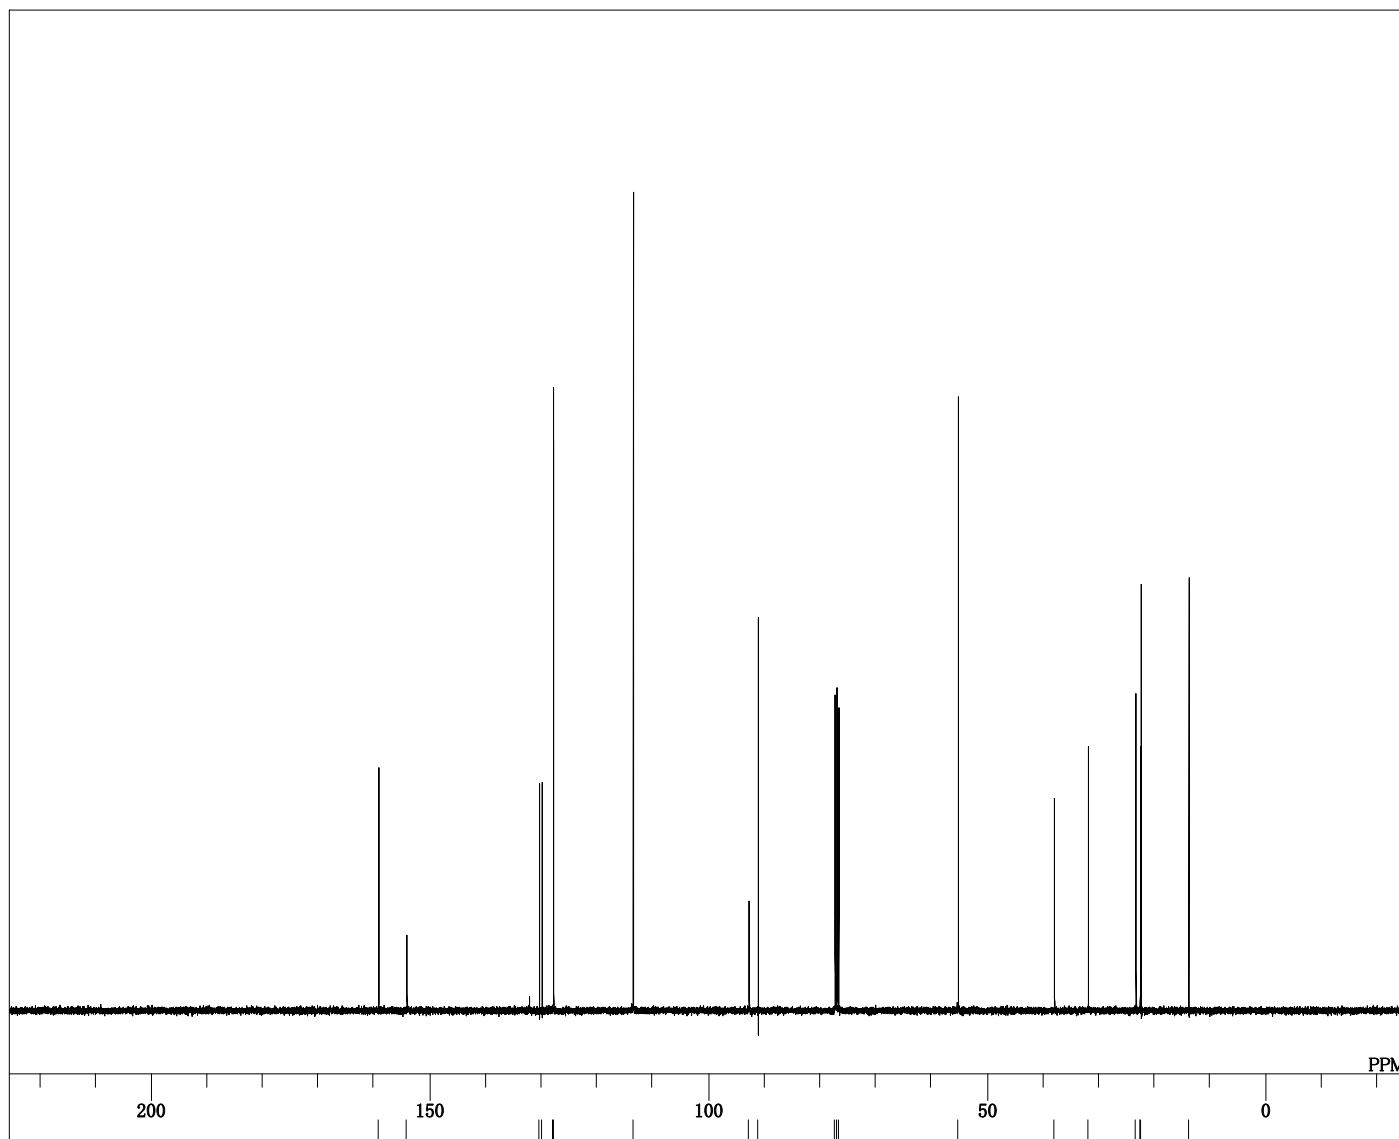

DFILE cyc\_PMPMP\_MenPentan\_Carbon.  
 COMNT single pulse decoupled gated NOE  
 DATIM 2020-10-09 13:24:21  
 OBNUC 13C  
 EXMOD carbon.jxp  
 OBFRQ 99.55 MHz  
 OBSET 5.13 KHz  
 OBFIN 0.98 Hz  
 POINT 26214  
 FREQU 25000.00 Hz  
 SCANS 637  
 ACQTM 1.0486 sec  
 PD 2.0000 sec  
 PW1 3.59 usec  
 IRNUC 1H  
 CTEMP 20.4 c  
 SLVNT CDCL3  
 EXREF 77.00 ppm  
 BF 0.12 Hz  
 RGAIN 50

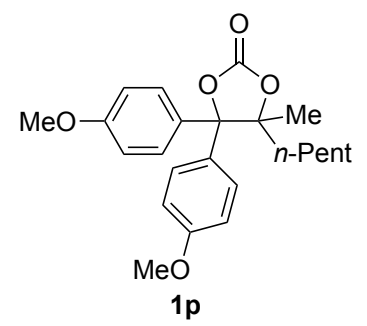

159.277  
 154.161  
 130.392  
 129.922  
 127.891  
 127.834  
 113.569  
 92.769  
 91.131  
 77.326  
 77.000  
 76.684  
 55.214  
 37.940  
 31.886  
 23.330  
 22.573  
 22.382  
 13.855

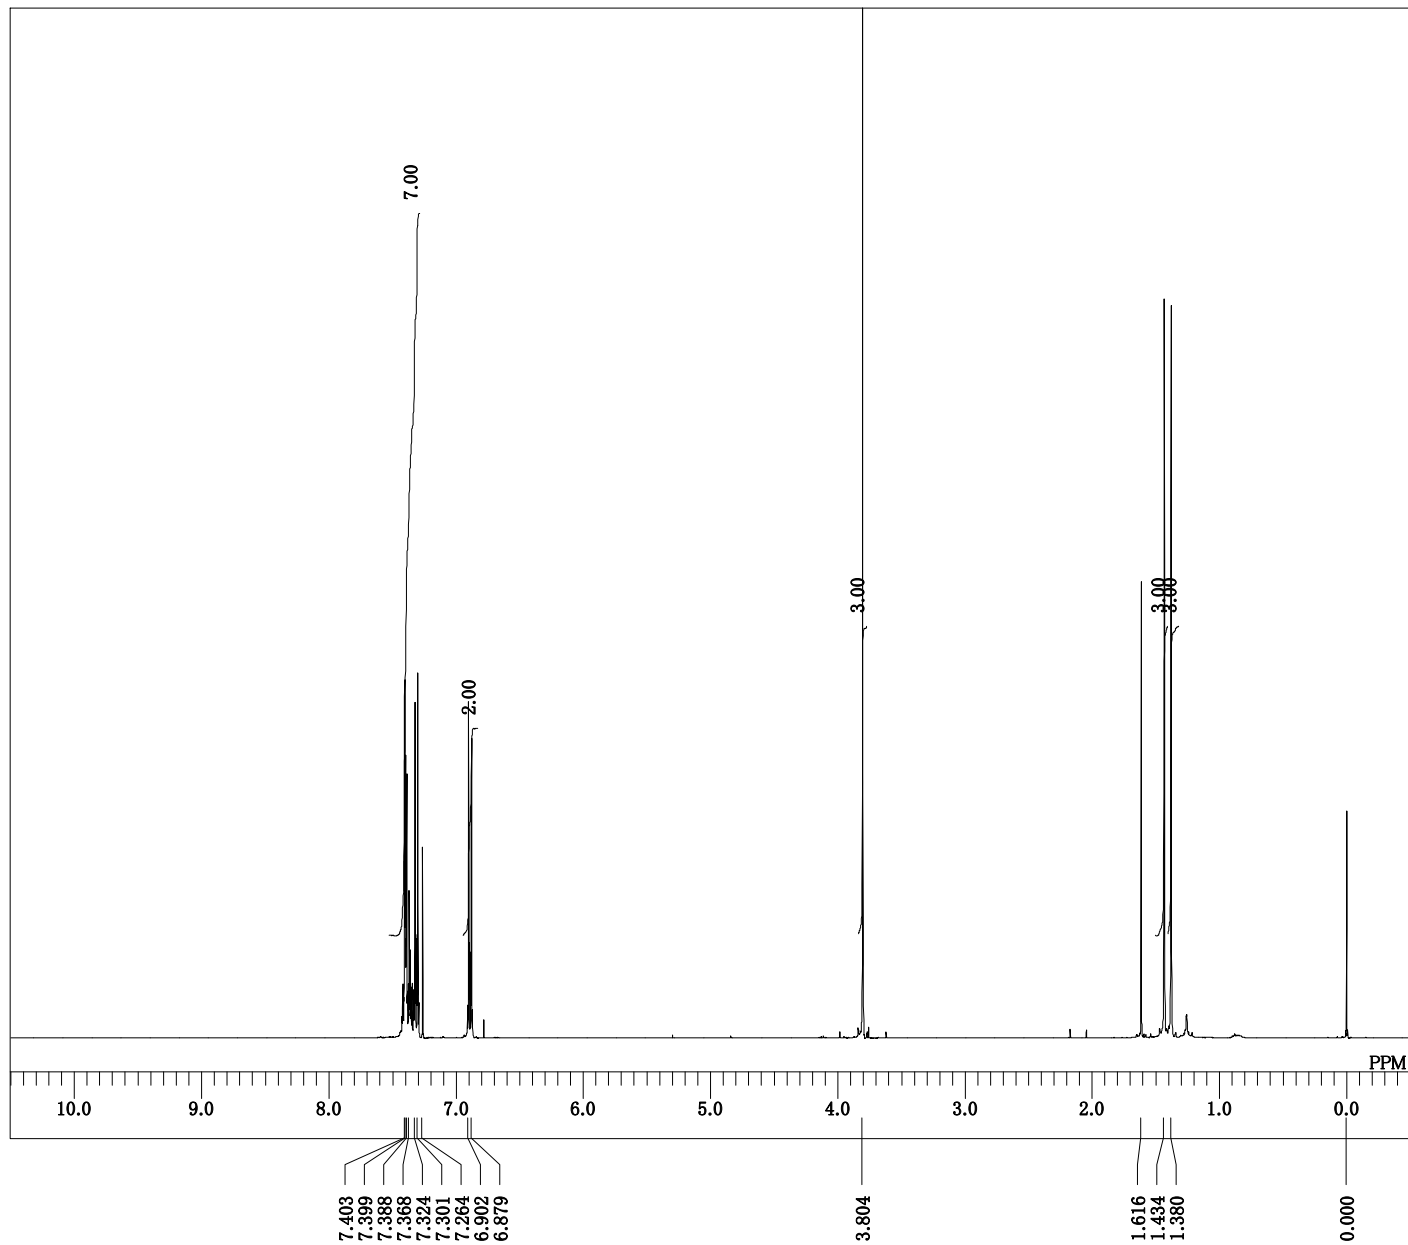

DFILE cyc\_PhPMP\_MeMe\_Proton.als  
 COMNT single\_pulse  
 DATIM 2020-09-13 11:10:51  
 OBNUC 1H  
 EXMOD proton.jxp  
 OBFRQ 395.88 MHz  
 OBSET 6.28 KHz  
 OBFIN 0.87 Hz  
 POINT 13107  
 FREQU 5938.24 Hz  
 SCANS 8  
 ACQTM 2.2073 sec  
 PD 5.0000 sec  
 PW1 3.14 usec  
 IRNUC 1H  
 CTEMP 20.8 c  
 SLVNT CDCL3  
 EXREF 0.00 ppm  
 BF 0.12 Hz  
 RGAIN 32

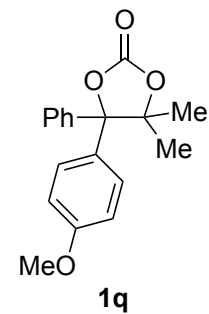

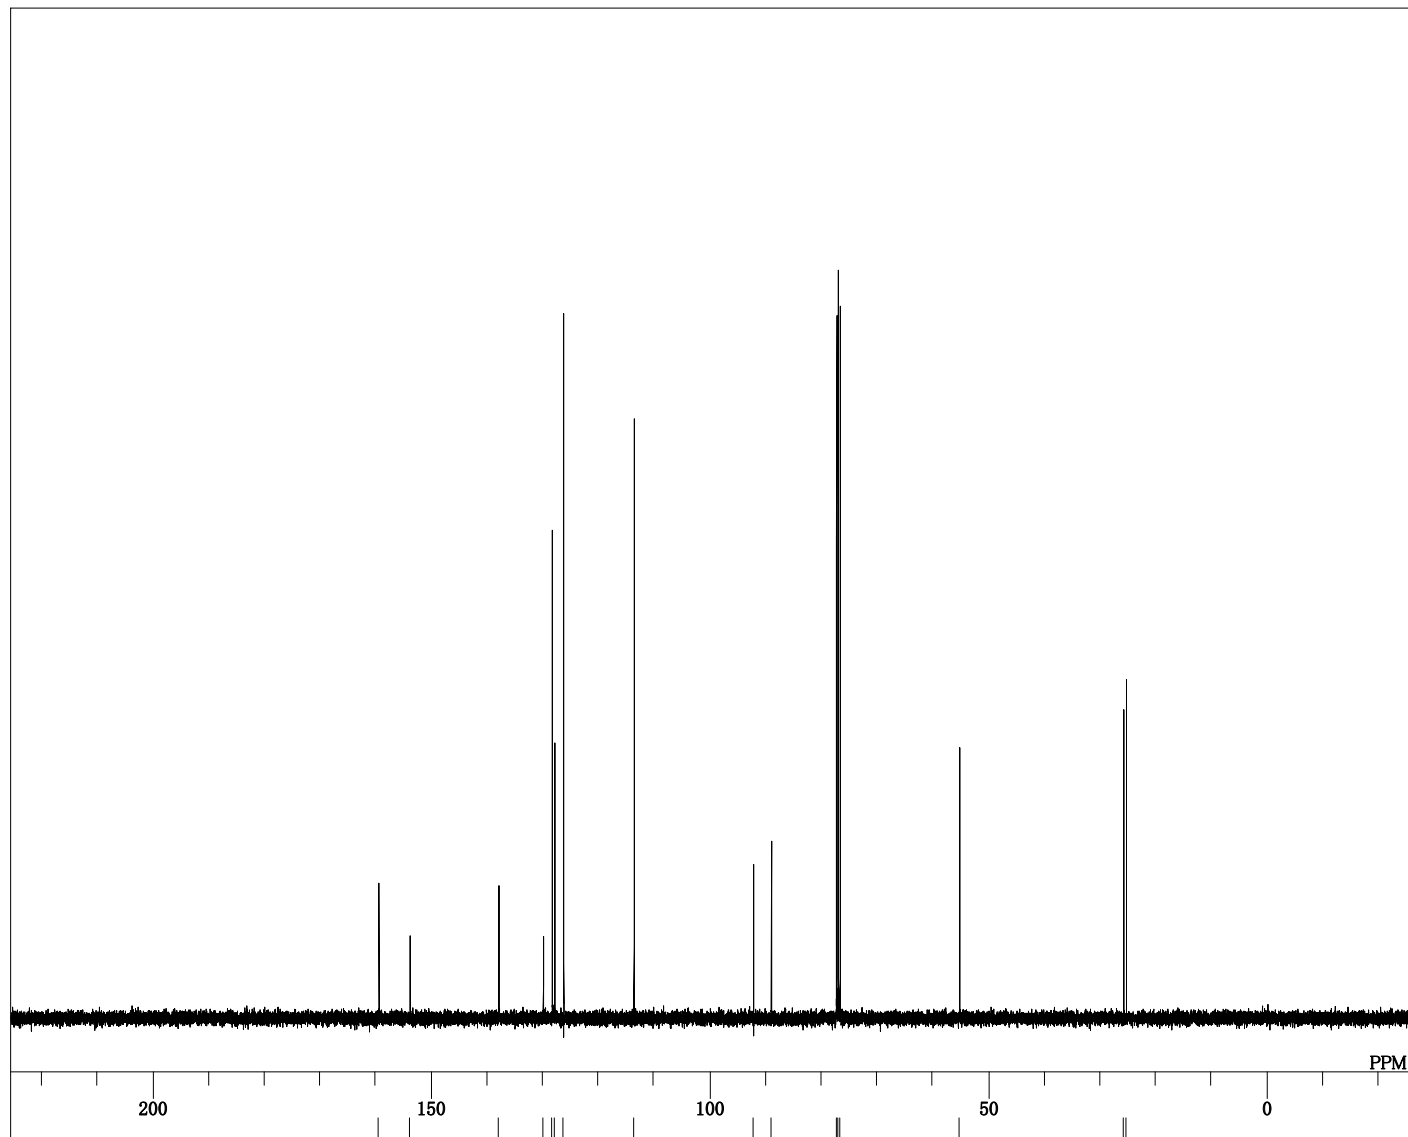

DFILE cyc.PhPMP\_MeMe\_Carbon.als  
 COMNT single pulse decoupled gated NOE  
 DATIM 2020-09-13 11:12:04  
 OBNUC <sup>13</sup>C  
 EXMOD carbon.jxp  
 OBFRQ 99.55 MHz  
 OBSET 5.13 KHz  
 OBFIN 0.98 Hz  
 POINT 26214  
 FREQU 25000.00 Hz  
 SCANS 611  
 ACQTM 1.0486 sec  
 PD 2.0000 sec  
 PW1 3.59 usec  
 IRNUC <sup>1</sup>H  
 CTEMP 20.1 c  
 SLVNT CDCL3  
 EXREF 77.00 ppm  
 BF 0.12 Hz  
 RGAIN 50

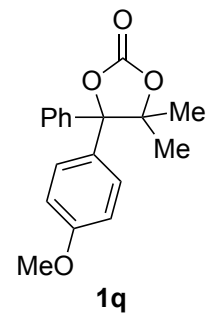

159.440  
153.902

137.903  
129.970  
128.370  
127.882  
126.291

113.693

92.185  
89.043

77.316  
77.000  
76.674

55.262

25.754  
25.304

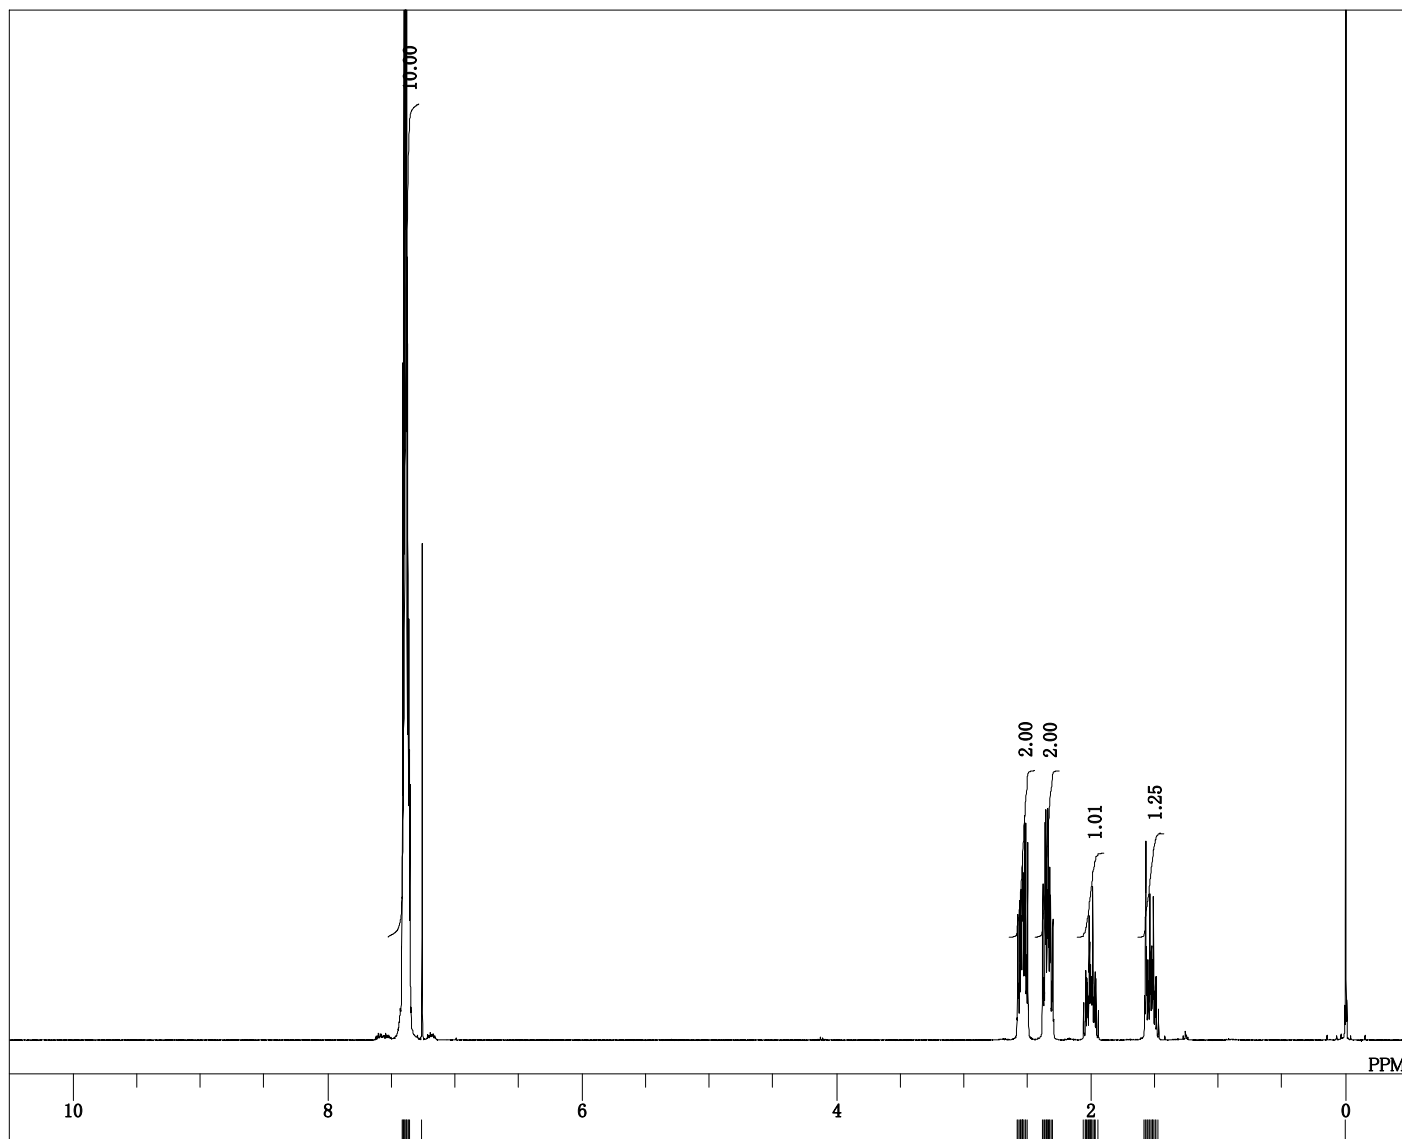

DFILE cyc\_cyc\_butyl\_Proton.als  
 COMNT single\_pulse  
 DATIM 2020-03-27 03:07:07  
 OBNUC 1H  
 EXMOD proton.jxp  
 OBFRQ 395.88 MHz  
 OBSET 6.28 KHz  
 OBFIN 0.87 Hz  
 POINT 13107  
 FREQU 5938.24 Hz  
 SCANS 8  
 ACQTM 2.2073 sec  
 PD 5.0000 sec  
 PW1 3.14 usec  
 IRNUC 1H  
 CTEMP 19.5 c  
 SLVNT CDCL3  
 EXREF 0.00 ppm  
 BF 0.12 Hz  
 RGAIN 36

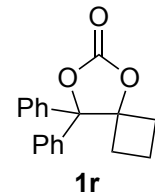

7.414  
 7.408  
 7.403  
 7.395  
 7.391  
 7.383  
 7.379  
 7.375  
 7.364  
 7.362  
 7.356  
 7.261  
 2.680  
 2.572  
 2.564  
 2.554  
 2.551  
 2.542  
 2.538  
 2.535  
 2.526  
 2.517  
 2.510  
 2.501  
 2.382  
 2.374  
 2.364  
 2.358  
 2.348  
 2.344  
 2.340  
 2.331  
 2.328  
 2.320  
 2.311  
 2.303  
 2.061  
 2.044  
 2.036  
 2.031  
 2.027  
 2.018  
 2.014  
 2.006  
 2.002  
 1.997  
 1.989  
 1.981  
 1.972  
 1.964  
 1.947  
 1.582  
 1.572  
 1.566  
 1.556  
 1.550  
 1.542  
 1.536  
 1.527  
 1.516  
 1.512  
 1.501  
 1.496  
 1.488  
 1.472  
 0.000

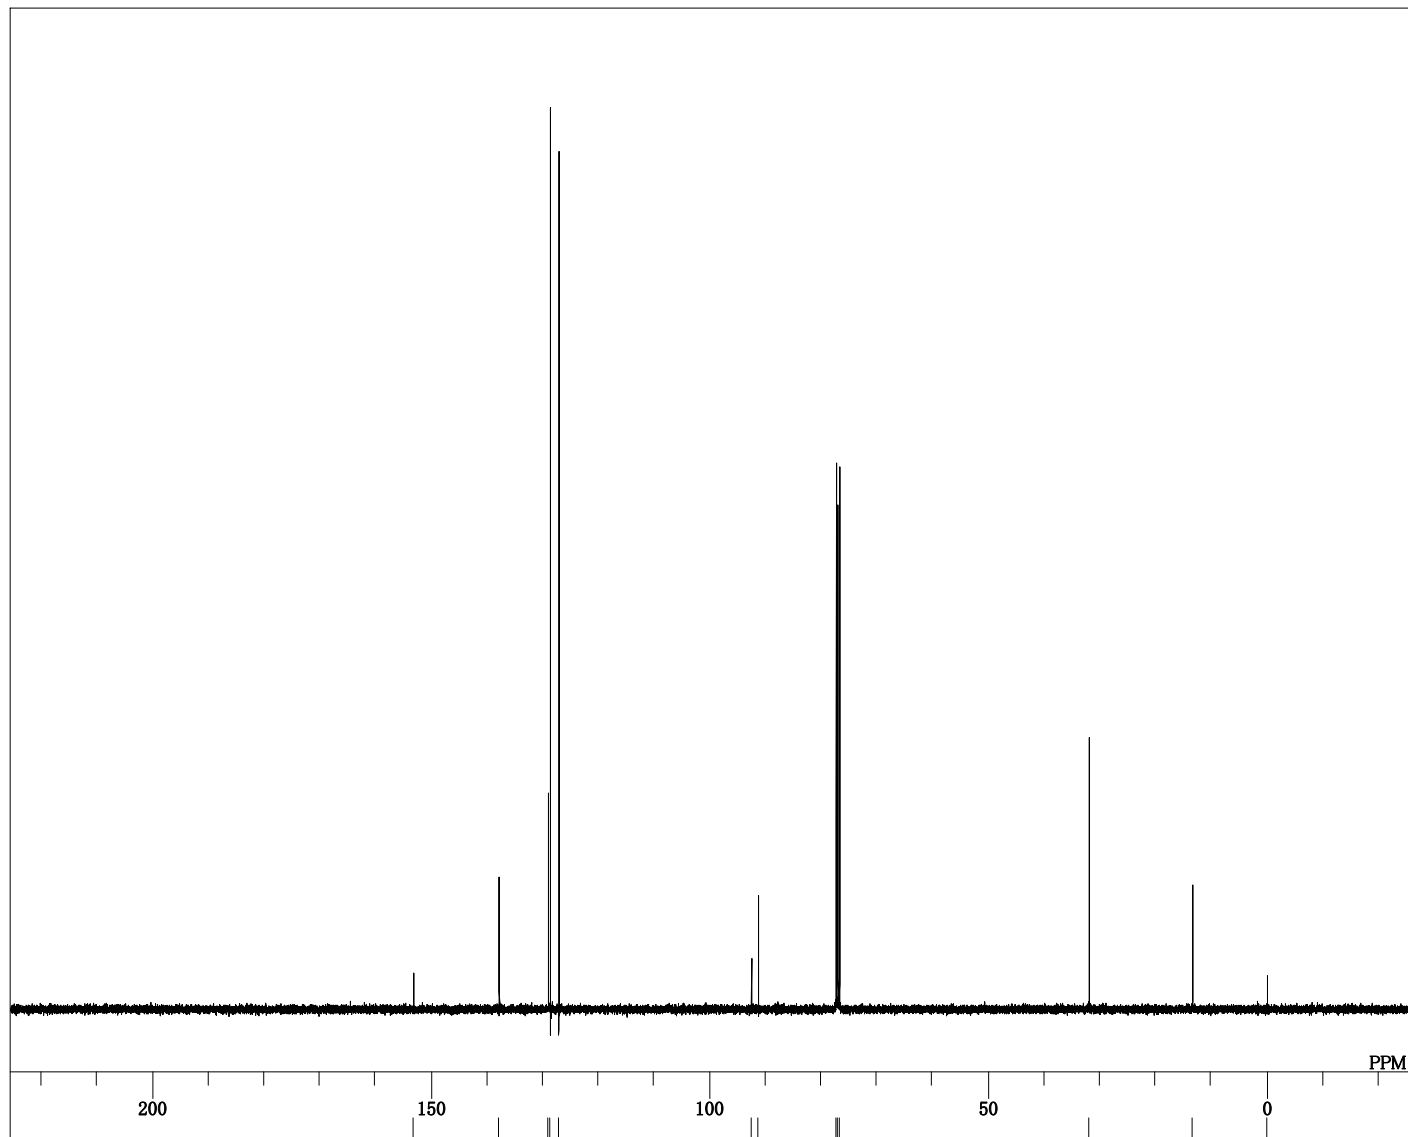

DFILE cyc\_cyc\_butyl\_Carbon.als  
 COMNT single pulse decoupled gated NOE  
 DATIM 2020-03-27 03:08:20  
 OBNUC 13C  
 EXMOD carbon.jxp  
 OBFRQ 99.55 MHz  
 OBSET 5.13 KHz  
 OBFIN 0.98 Hz  
 POINT 26214  
 FREQU 25000.00 Hz  
 SCANS 1024  
 ACQTM 1.0486 sec  
 PD 2.0000 sec  
 PW1 3.59 usec  
 IRNUC 1H  
 CTEMP 19.8 c  
 SLVNT CDCL3  
 EXREF 0.00 ppm  
 BF 0.12 Hz  
 RGAIN 50

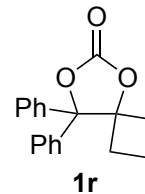

153.192

137.805

128.982

128.599

127.123

92.547

91.321

77.343

77.017

76.701

31.913

13.393

0.000

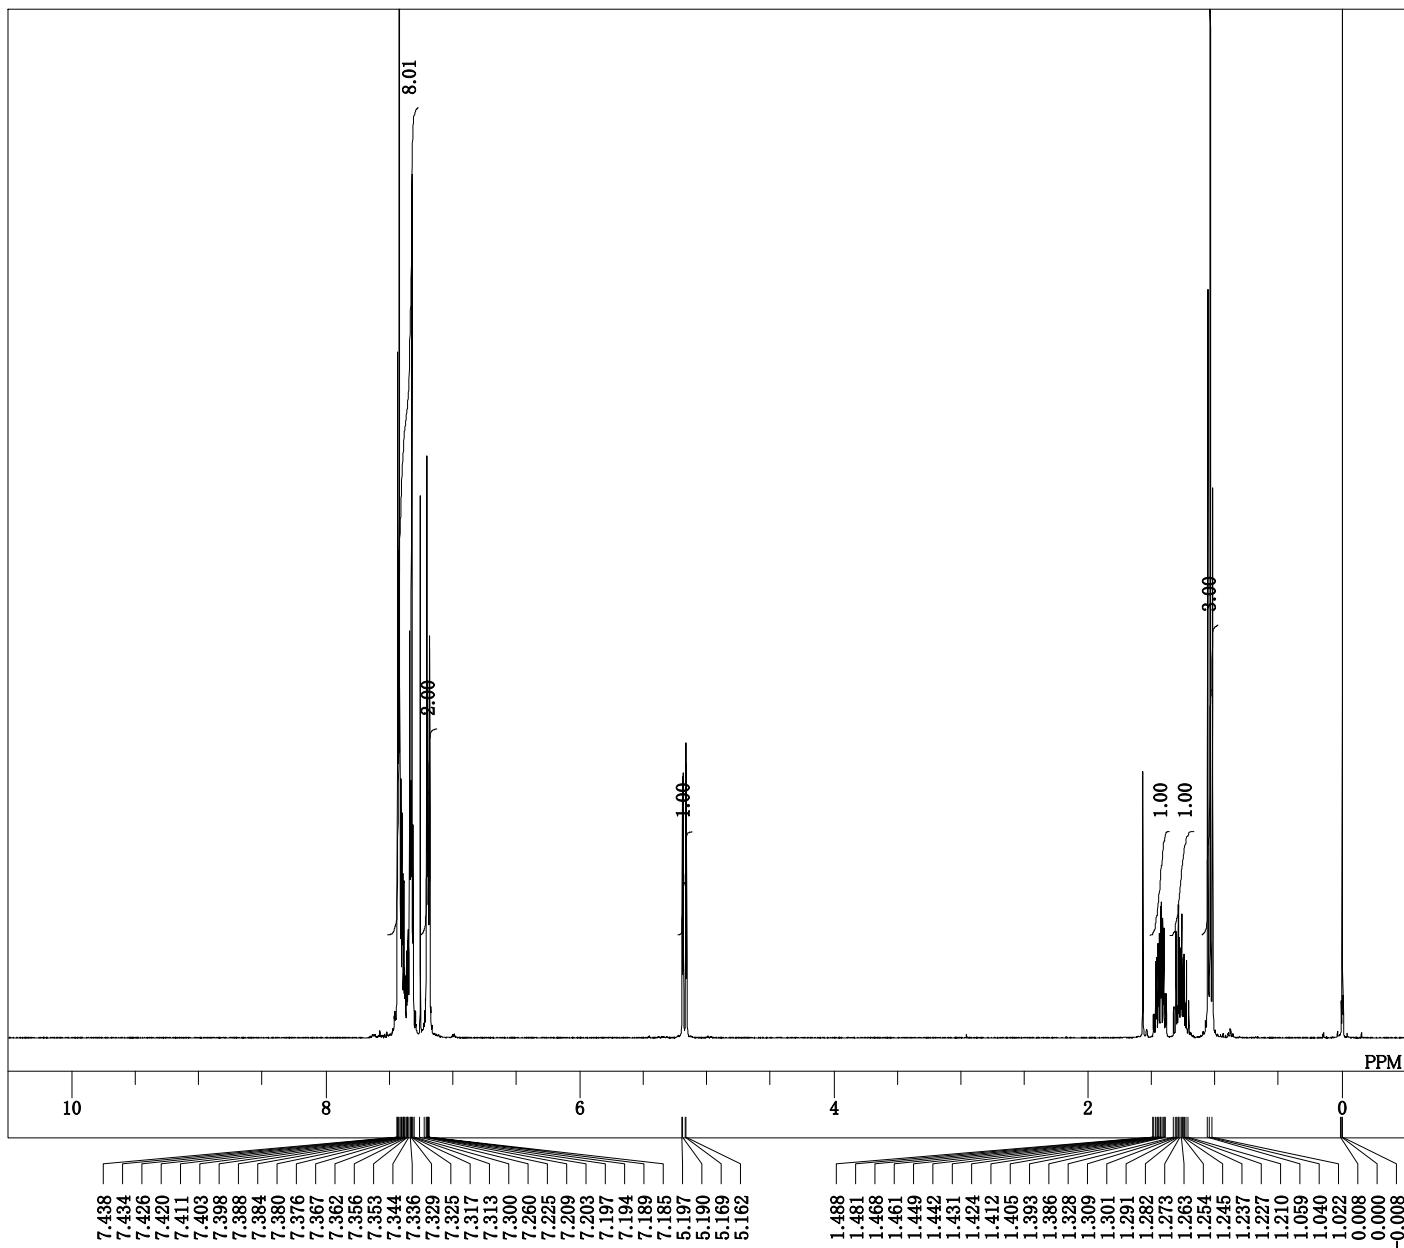

DFILE cyc\_H\_Et\_Proton.als  
 COMNT single\_pulse  
 DATIM 2020-03-27 05:44:45  
 OBNUC 1H  
 EXMOD proton\_jxp  
 OBFRQ 395.88 MHz  
 OBSET 6.28 KHz  
 OBFIN 0.87 Hz  
 POINT 13107  
 FREQU 5938.24 Hz  
 SCANS 8  
 ACQTM 2.2073 sec  
 PD 5.0000 sec  
 PW1 3.14 usec  
 IRNUC 1H  
 CTEMP 19.8 c  
 SLVNT CDCL3  
 EXREF 0.00 ppm  
 BF 0.12 Hz  
 RGAIN 36

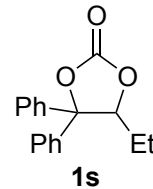

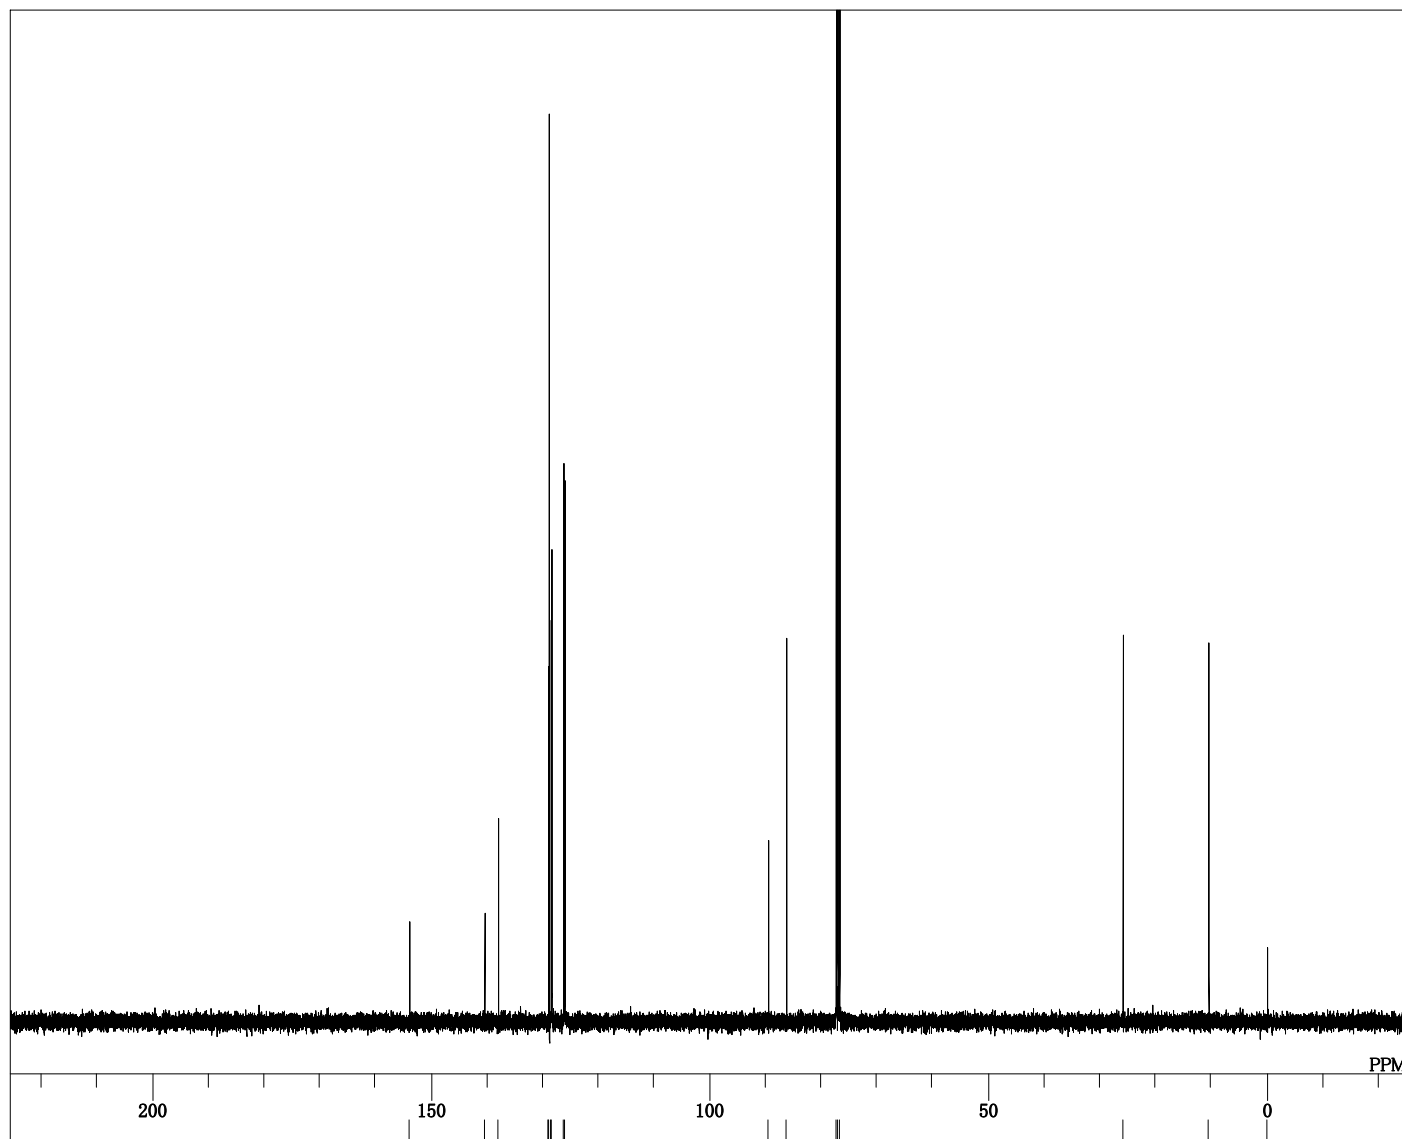

DFILE cyc\_H\_Et\_Carbon.als  
 COMNT single pulse decoupled gated NOE  
 DATIM 2020-03-27 05:45:58  
 OBNUC 13C  
 EXMOD carbon.jxp  
 OBFRQ 99.55 MHz  
 OBSET 5.13 KHz  
 OBFIN 0.98 Hz  
 POINT 26214  
 FREQU 25000.00 Hz  
 SCANS 1024  
 ACQTM 1.0486 sec  
 PD 2.0000 sec  
 PW1 3.59 usec  
 IRNUC 1H  
 CTEMP 19.8 c  
 SLVNT CDCL3  
 EXREF 0.00 ppm  
 BF 0.12 Hz  
 RGAIN 50

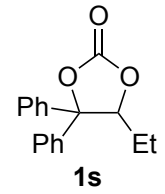

153.929  
 140.421  
 137.930  
 128.982  
 128.838  
 128.493  
 128.397  
 126.242  
 126.050

89.529  
 86.234  
 77.343  
 77.017  
 76.701

25.867  
 10.452  
 0.000



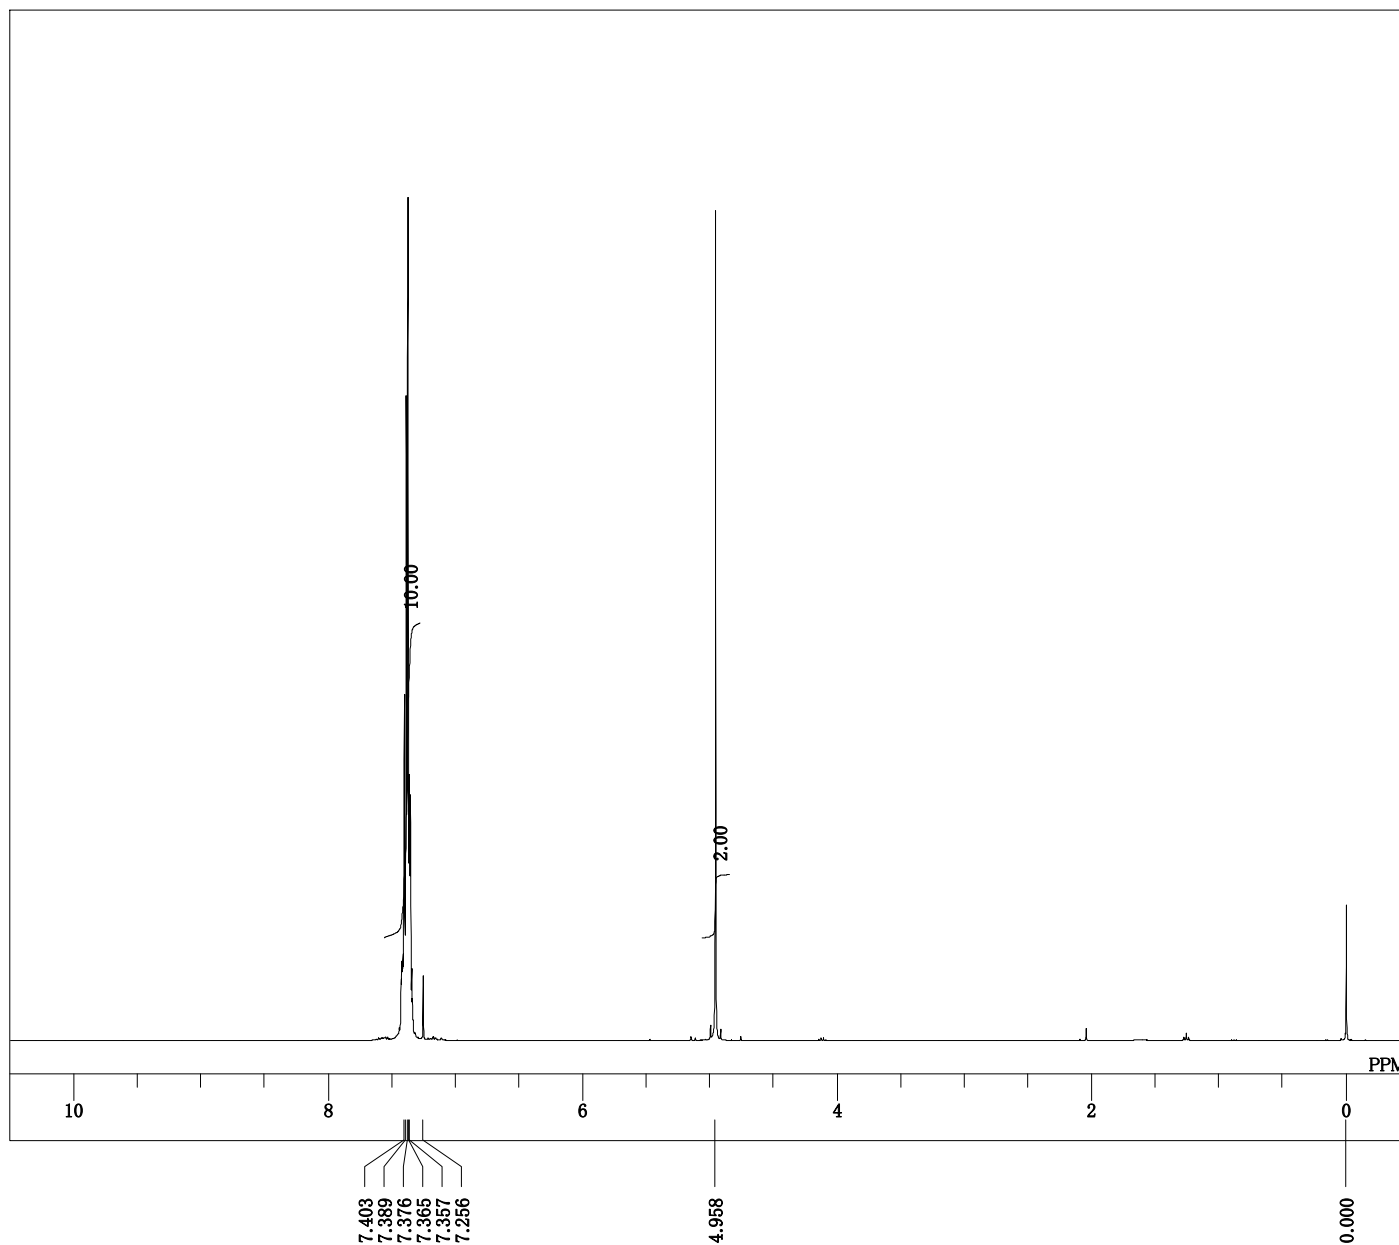

DFILE cyc\_H\_HProton.als  
 COMNT single\_pulse  
 DATIM 2020-12-21 18:23:17  
 OBNUC 1H  
 EXMOD proton.jxp  
 OBFRQ 395.88 MHz  
 OBSET 6.28 KHz  
 OBFIN 0.87 Hz  
 POINT 16384  
 FREQU 7422.80 Hz  
 SCANS 8  
 ACQTM 2.2073 sec  
 PD 5.0000 sec  
 PW1 3.14 usec  
 IRNUC 1H  
 CTEMP 18.4 c  
 SLVNT CDCL3  
 EXREF 0.00 ppm  
 BF 0.72 Hz  
 RGAIN 32

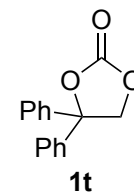

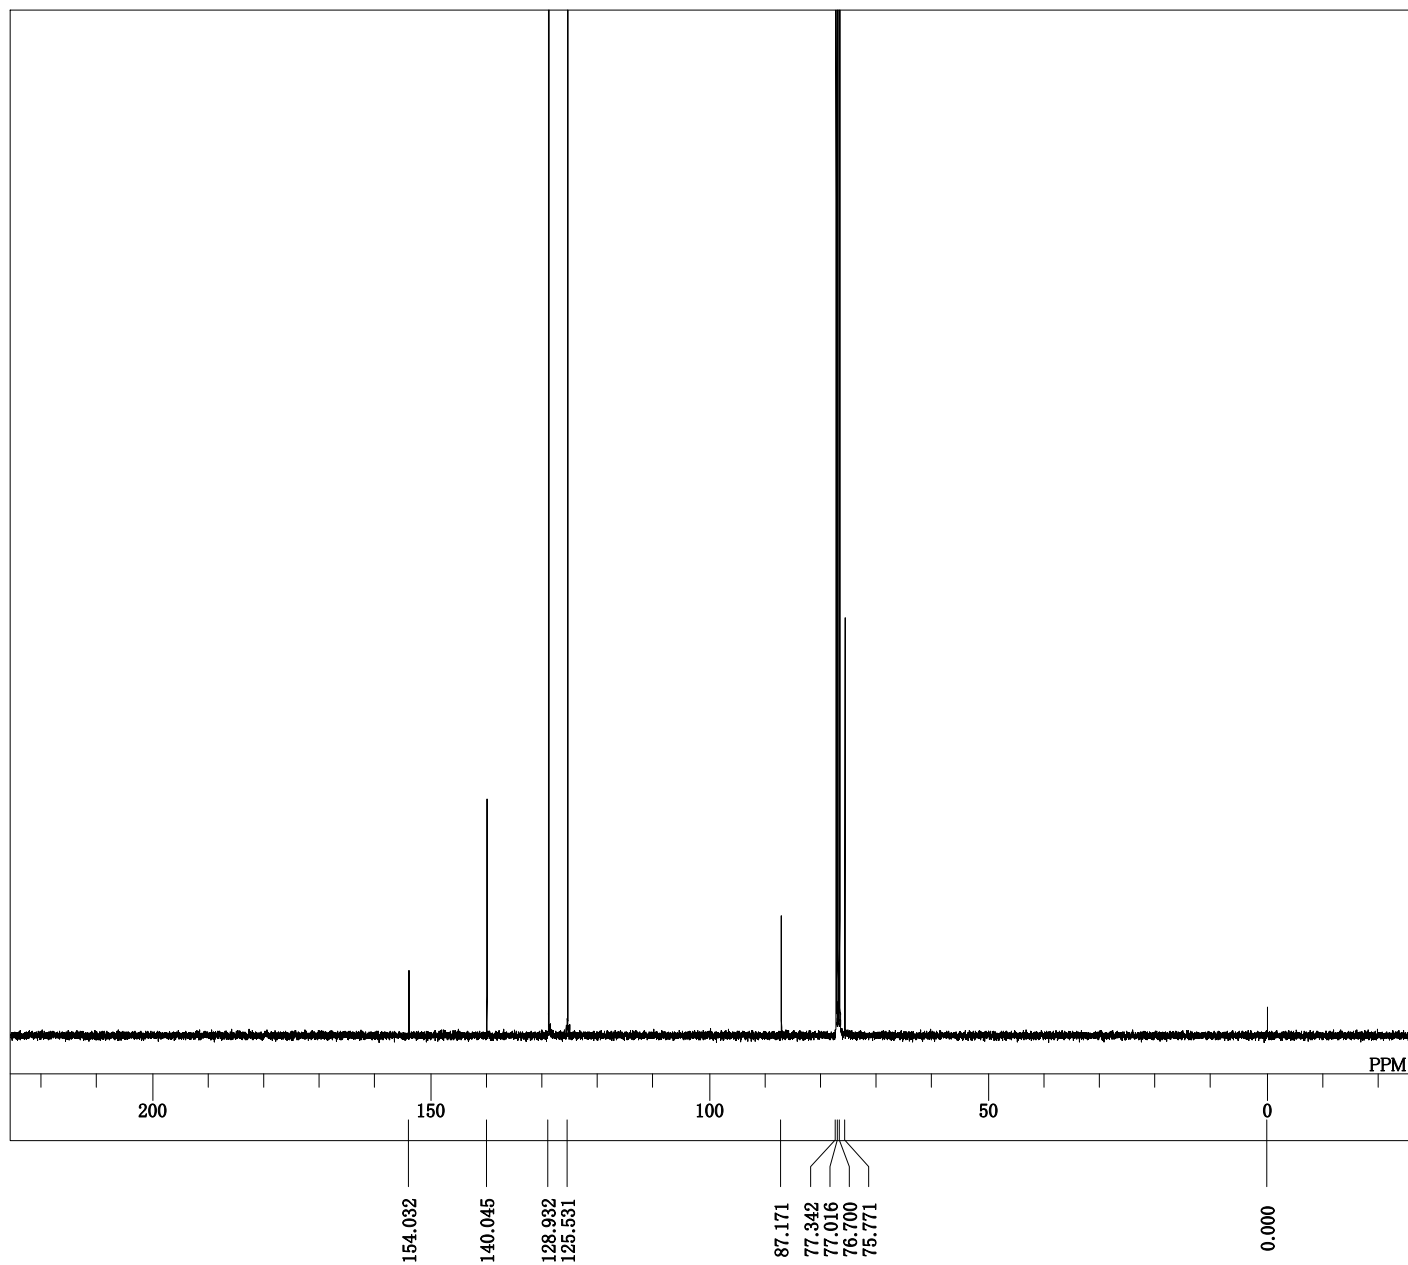

DFILE cyc\_HH\_Carbon.als  
 COMNT single pulse decoupled gated NOE  
 DATIM 2020-12-23 00:13:16  
 OBNUC <sup>13</sup>C  
 EXMOD carbon.jxp  
 OBFRQ 99.55 MHz  
 OBSET 5.13 KHz  
 OBFIN 0.98 Hz  
 POINT 32767  
 FREQU 31250.00 Hz  
 SCANS 2319  
 ACQTM 1.0486 sec  
 PD 2.0000 sec  
 PW1 3.59 usec  
 IRNUC <sup>1</sup>H  
 CTEMP 19.6 c  
 SLVNT CDCL<sub>3</sub>  
 EXREF 0.00 ppm  
 BF 0.72 Hz  
 RGAIN 50



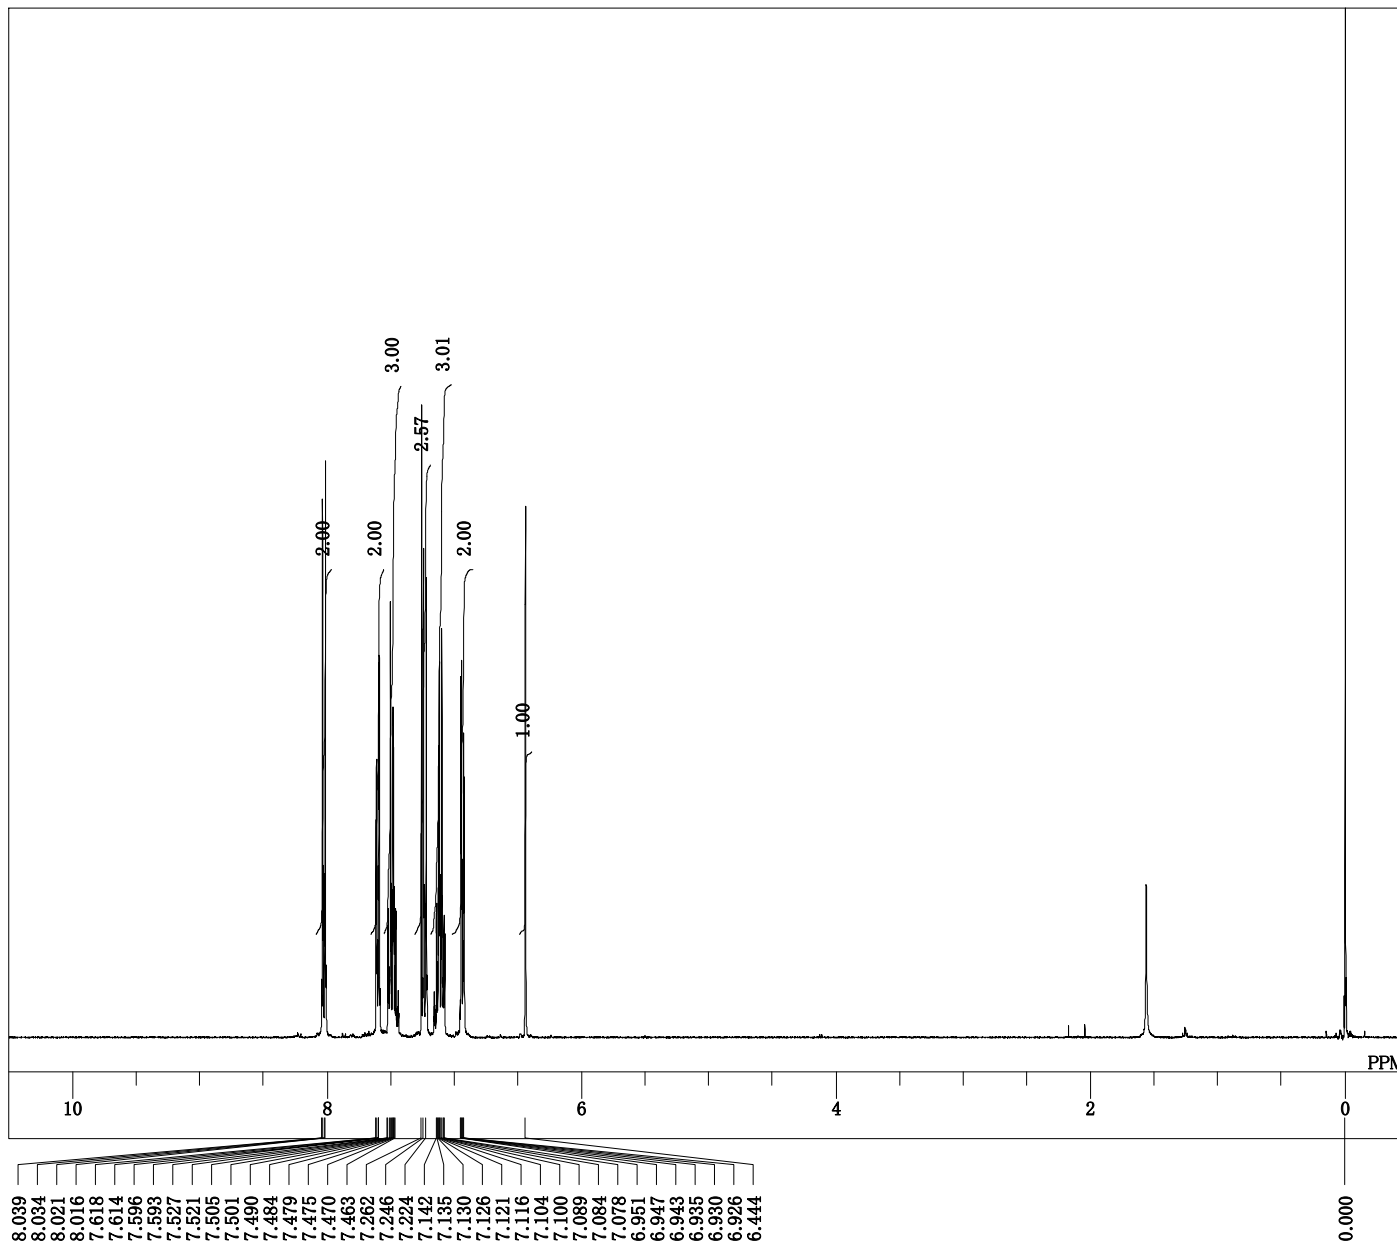

DFILE cyc\_H\_pNO2\_Proton.als  
 COMNT single\_pulse  
 DATIM 2020-03-28 15:33:31  
 OBNUC 1H  
 EXMOD single\_pulse.ex2  
 OBFRQ 391.78 MHz  
 OBSET 8.51 KHz  
 OBFIN 3.34 Hz  
 POINT 26214  
 FREQU 5882.26 Hz  
 SCANS 16  
 ACQTM 4.4564 sec  
 PD 3.0000 sec  
 PW1 5.90 usec  
 IRNUC 1H  
 CTEMP 20.7 c  
 SLVNT CDCL3  
 EXREF 0.00 ppm  
 BF 0.12 Hz  
 RGAIN 50

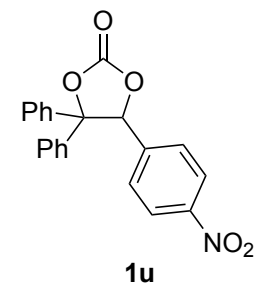

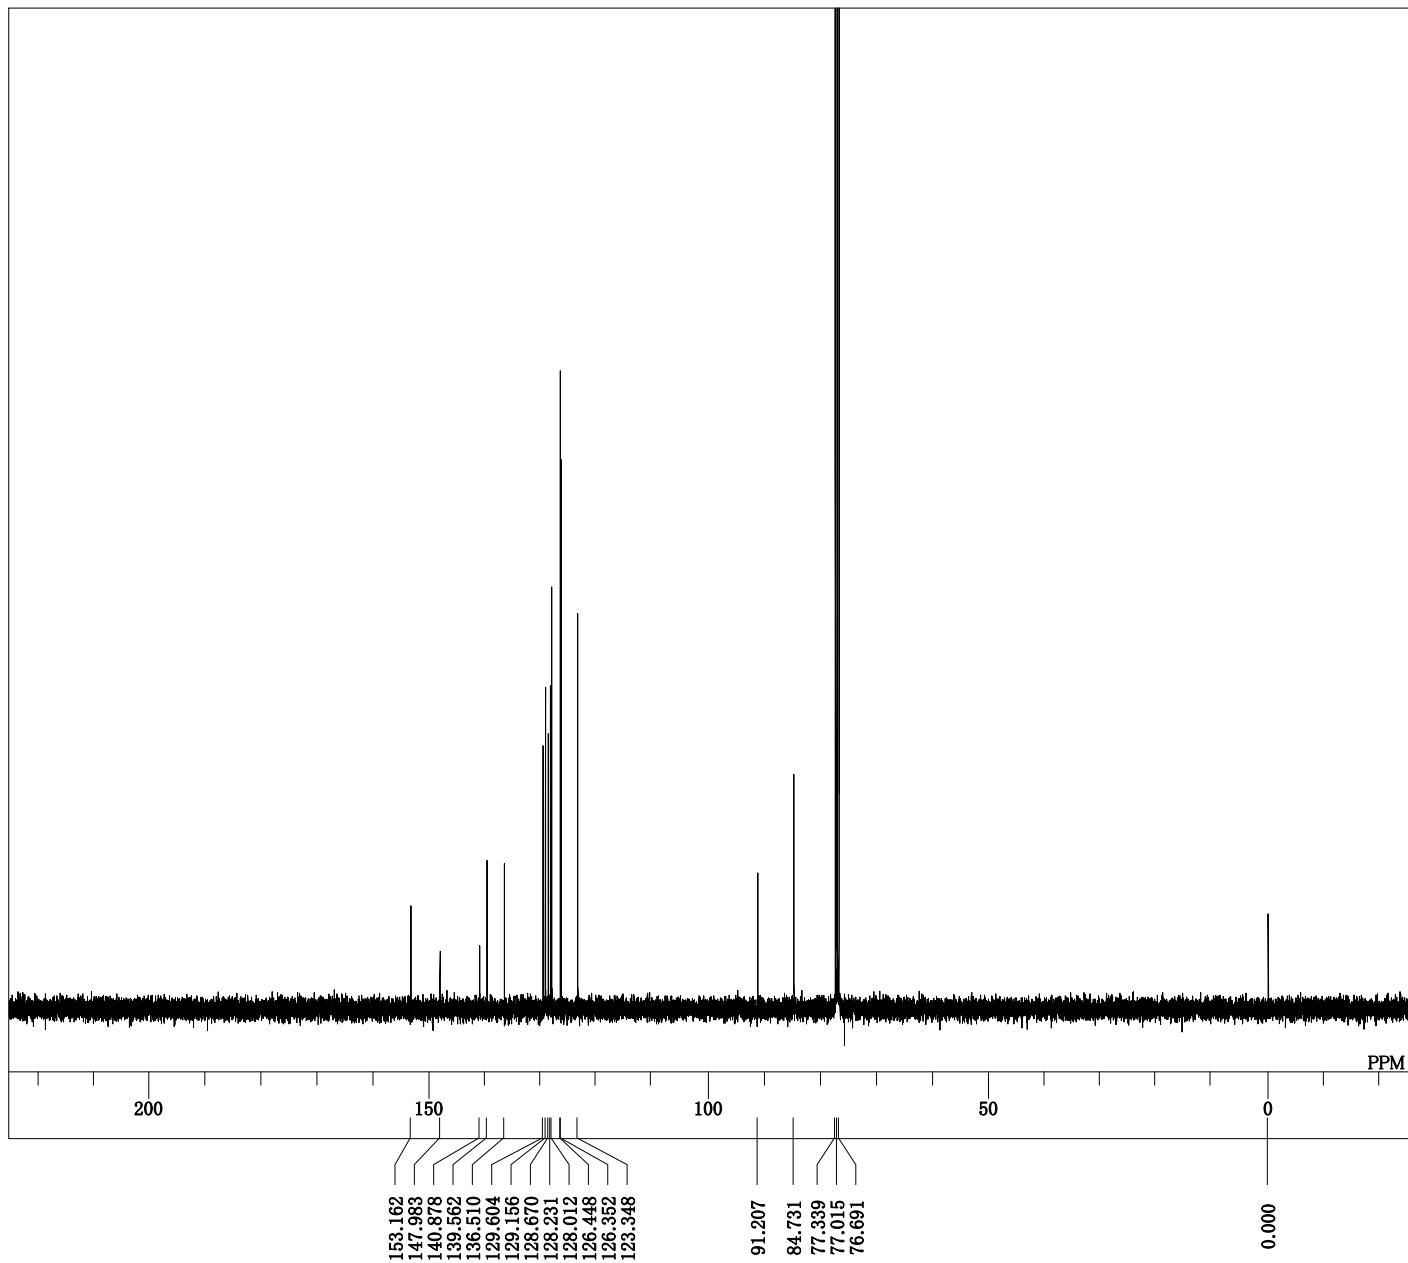

DFILE cyc\_H\_pNO2\_Carbon.als  
 COMNT single pulse decoupled gated NOE  
 DATIM 2020-03-28 16:28:44  
 OBNUC 13C  
 EXMOD single\_pulse\_dec  
 OBFRQ 98.52 MHz  
 OBSET 4.64 KHz  
 OBFIN 8.74 Hz  
 POINT 26214  
 FREQU 24630.17 Hz  
 SCANS 1024  
 ACQTM 1.0643 sec  
 PD 2.0000 sec  
 PW1 3.17 usec  
 IRNUC 1H  
 CTEMP 20.7 c  
 SLVNT CDCL3  
 EXREF 0.00 ppm  
 BF 0.12 Hz  
 RGAIN 50

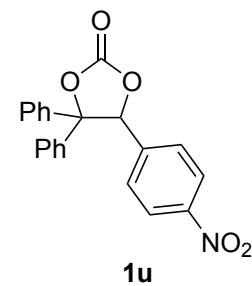

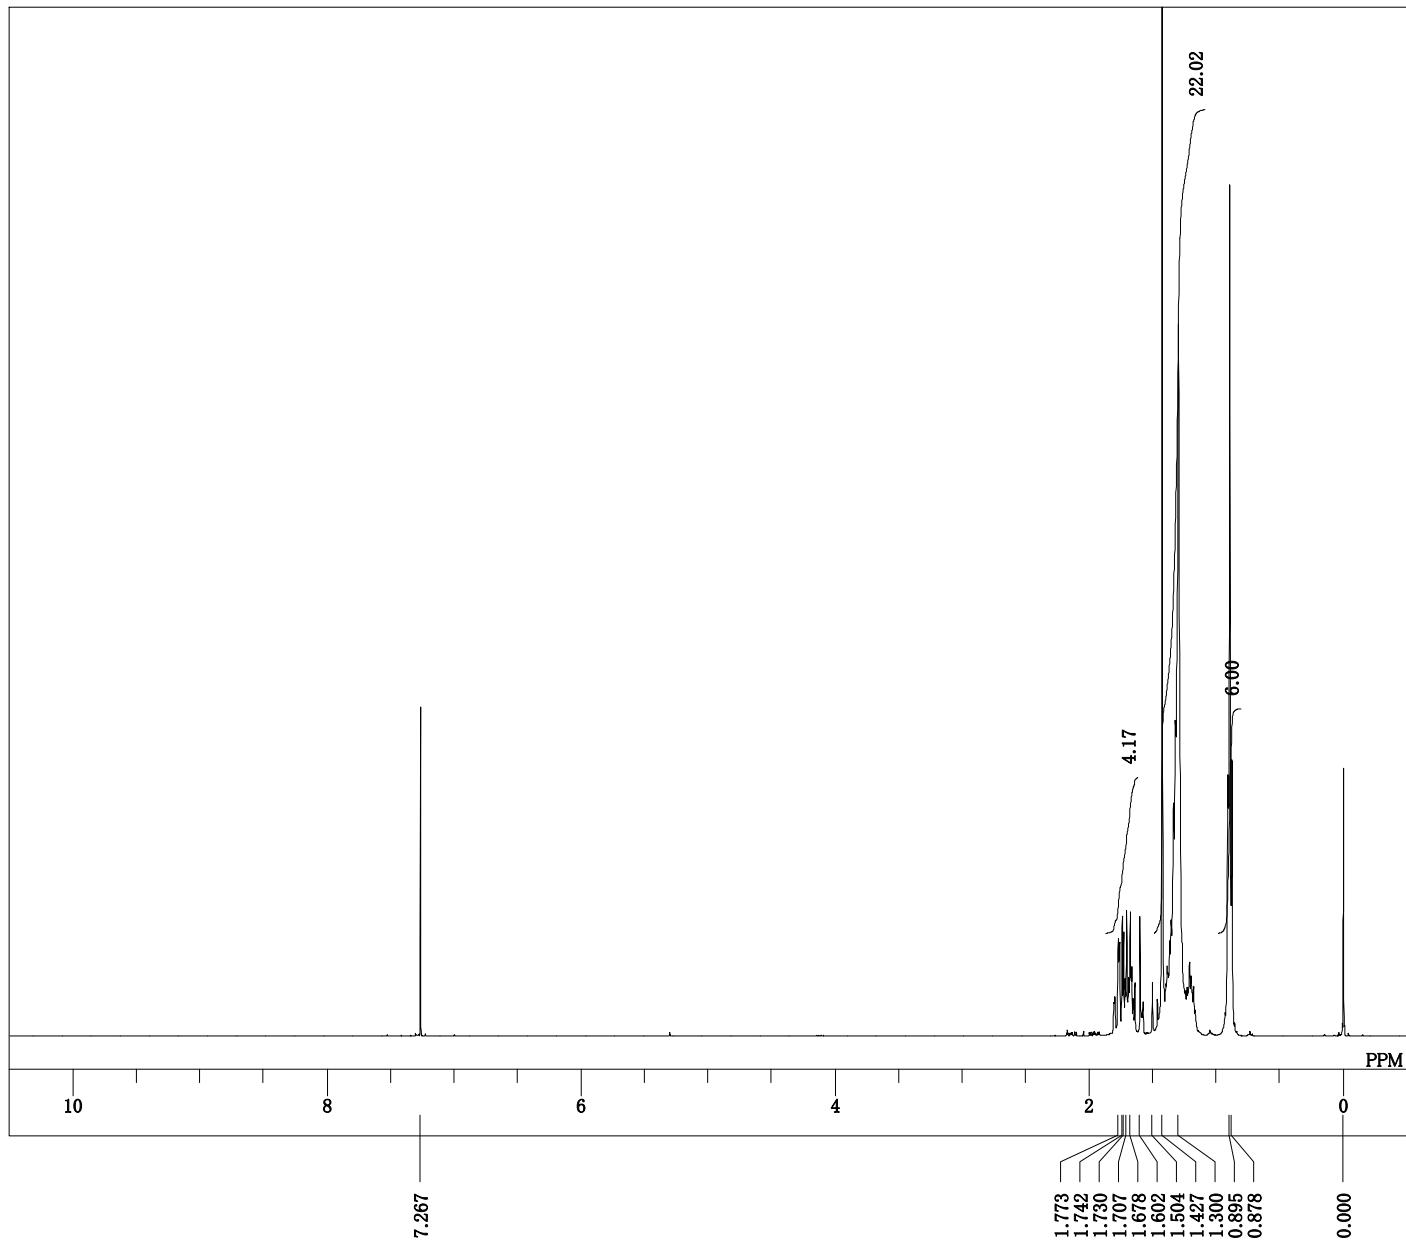

DFILE cyc\_Me\_Me\_nHex\_nHex\_Proton.als  
 COMNT single\_pulse  
 DATIM 2020-07-15 16:29:15  
 OBNUC 1H  
 EXMOD proton.jxp  
 OBFRQ 395.88 MHz  
 OBSET 6.28 KHz  
 OBFIN 0.87 Hz  
 POINT 13107  
 FREQU 5938.24 Hz  
 SCANS 8  
 ACQTM 2.2073 sec  
 PD 5.0000 sec  
 PW1 3.14 usec  
 IRNUC 1H  
 CTEMP 20.8 c  
 SLVNT CDCL3  
 EXREF 0.00 ppm  
 BF 0.12 Hz  
 RGAIN 30

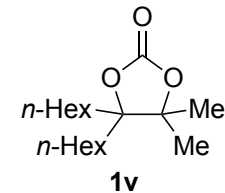

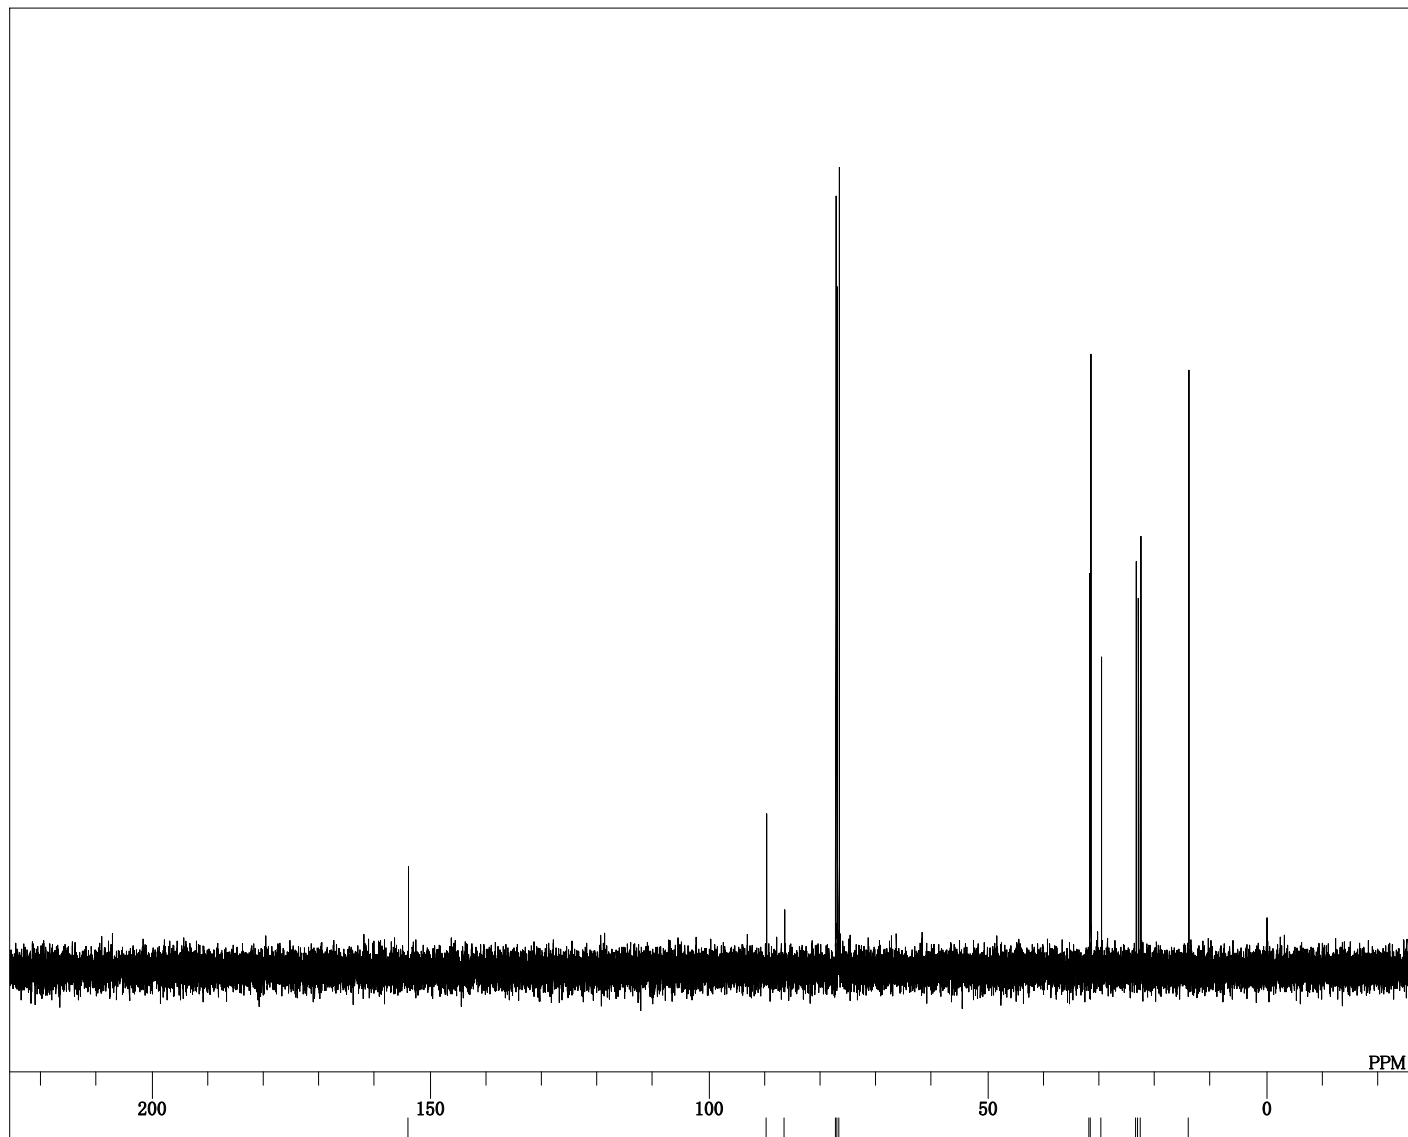

DFILE cyc\_Me\_Me\_nHex\_nHex\_Carbon.als  
 COMNT single pulse decoupled gated NOE  
 DATIM 2020-07-15 16:30:27  
 OBNUC 13C  
 EXMOD carbon.jxp  
 OBFRQ 99.55 MHz  
 OBSET 5.13 KHz  
 OBFIN 0.98 Hz  
 POINT 26214  
 FREQU 25000.00 Hz  
 SCANS 64  
 ACQTM 1.0486 sec  
 PD 2.0000 sec  
 PW1 3.59 usec  
 IRNUC 1H  
 CTEMP 20.9 c  
 SLVNT CDCL3  
 EXREF 77.00 ppm  
 BF 0.12 Hz  
 RGAIN 50

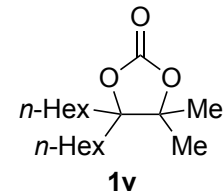

153.998

89.675  
86.456  
77.316  
77.000  
76.674

31.771  
31.502  
29.615  
23.378  
22.985  
22.535  
13.989

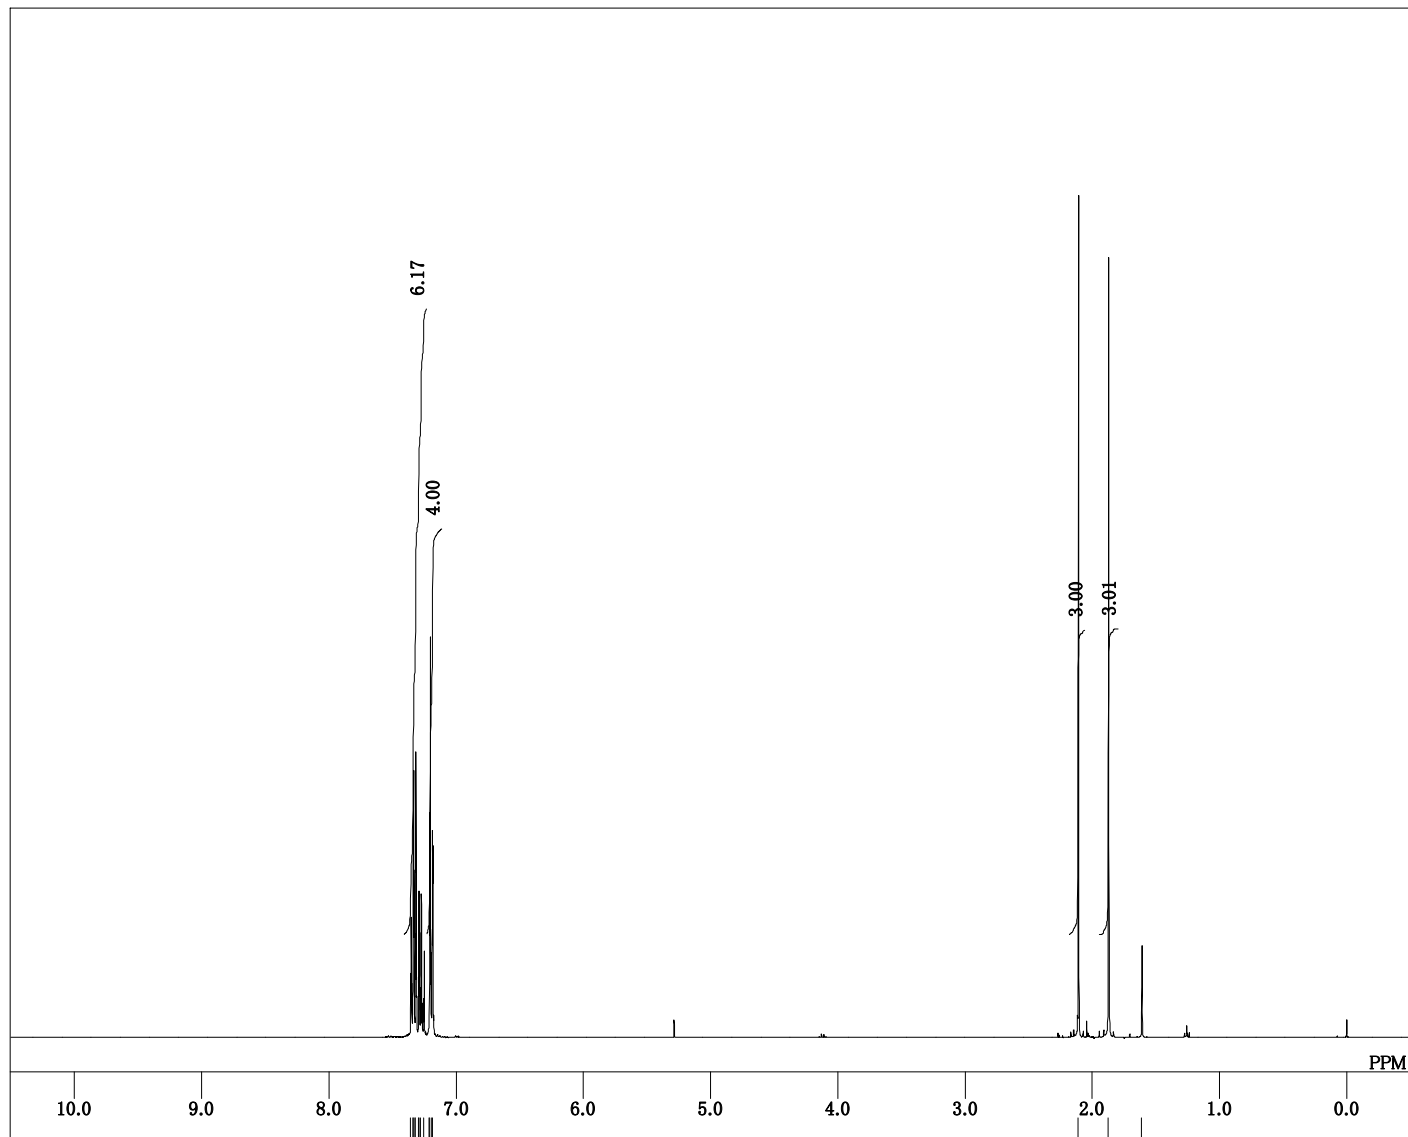

7.353  
7.336  
7.331  
7.320  
7.316  
7.291  
7.288  
7.274  
7.251  
7.206  
7.203  
7.186  
7.182

2.109  
1.871  
1.609

DFILE pro\_diol\_Me\_Me\_Proton.als  
COMNT single\_pulse  
DATIM 2020-07-08 12:44:18  
OBNUC 1H  
EXMOD proton.jp  
OBFRQ 395.88 MHz  
OBSET 6.28 KHz  
OBFIN 0.87 Hz  
POINT 13107  
FREQU 5938.24 Hz  
SCANS 8  
ACQTM 2.2073 sec  
PD 5.0000 sec  
PW1 3.14 usec  
IRNUC 1H  
CTEMP 20.4 c  
SLVNT CDCL3  
EXREF 0.00 ppm  
BF 0.12 Hz  
RGAIN 28

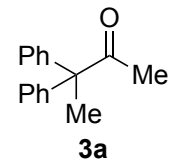

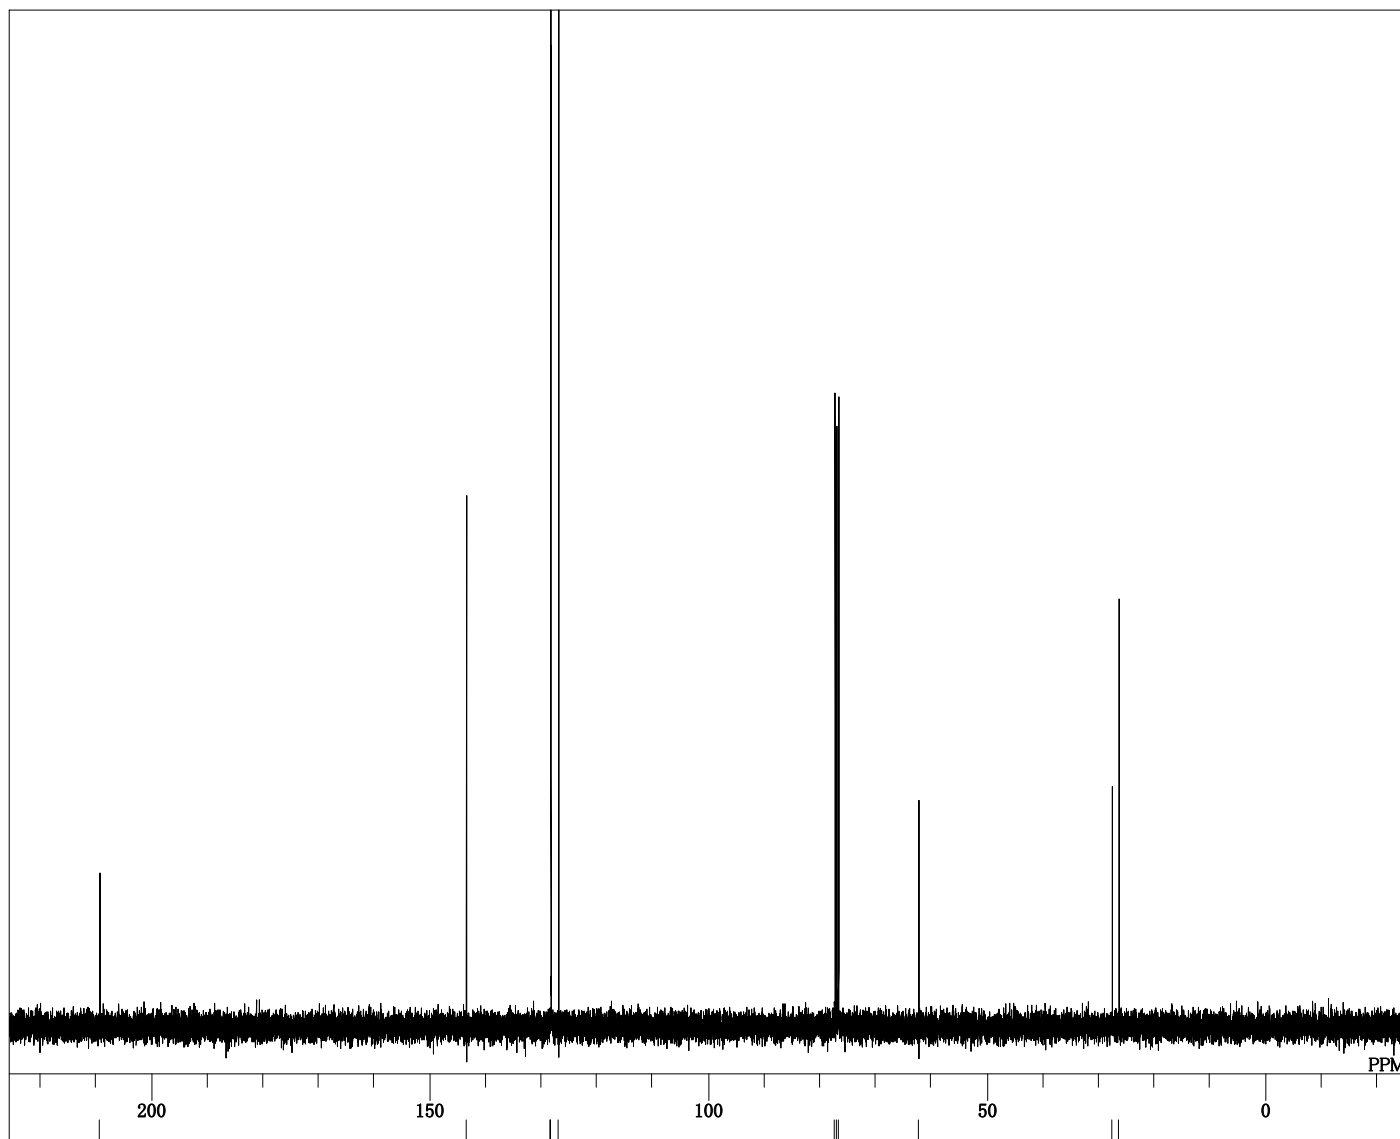

```

DFILE      pro_diol_Me_Me_Carbon.als
COMNT      single pulse decoupled gated NOE
DATIM      2020-07-08 12:45:31
OBNUC      13C
EXMOD      carbon.jxp
OBFRQ      99.55 MHz
OBSET      5.13 KHz
OBFIN      0.98 Hz
POINT      26214
FREQU      25000.00 Hz
SCANS      106
ACQTM      1.0486 sec
PD         2.0000 sec
PW1        3.59 usec
IRNUC      1H
CTEMP      20.2 c
SLVNT      CDCL3
EXREF      77.00 ppm
BF         0.12 Hz
RGAIN      50
  
```

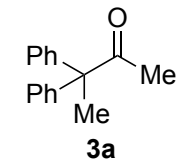

209.239

143.498

128.332  
128.313  
126.885

77.316  
77.000  
76.674

62.265

27.594  
26.367



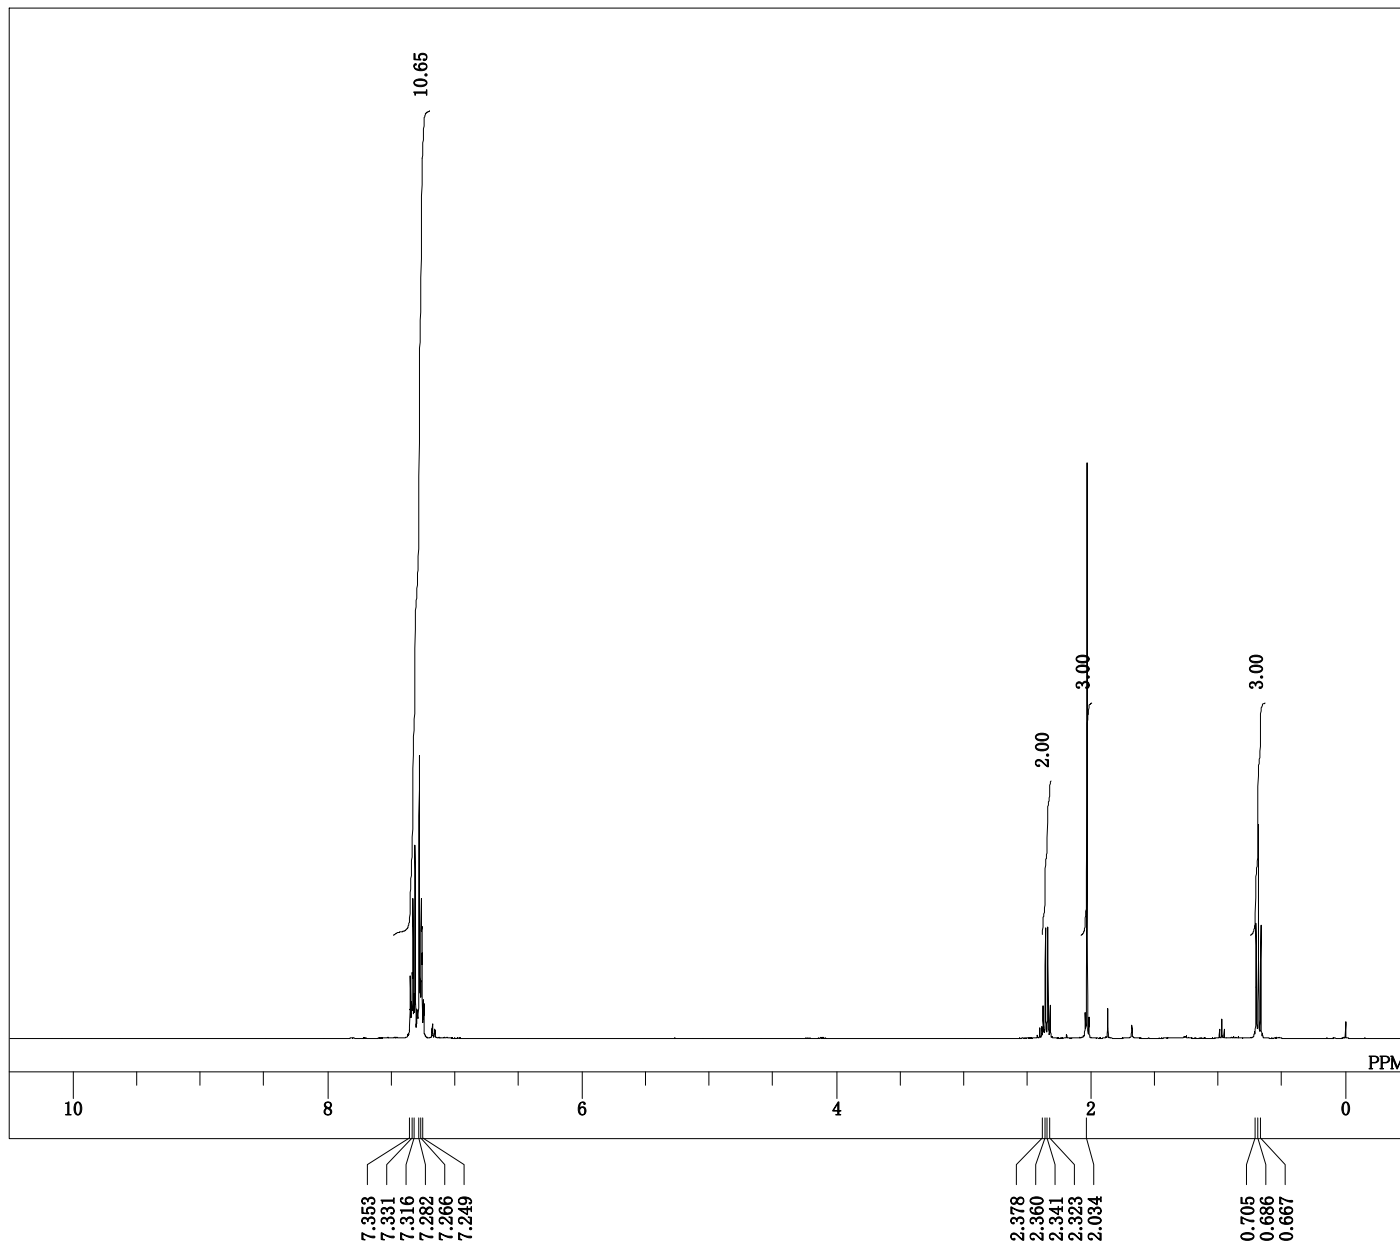

DFILE pro\_diol\_Me\_Et\_fr1\_Proton.als  
 COMNT single\_pulse  
 DATIM 2020-07-13 20:26:25  
 OBNUC 1H  
 EXMOD proton.jxp  
 OBFRQ 395.88 MHz  
 OBSET 6.28 KHz  
 OBFIN 0.87 Hz  
 POINT 13107  
 FREQU 5938.24 Hz  
 SCANS 8  
 ACQTM 2.2073 sec  
 PD 5.0000 sec  
 PW1 3.14 usec  
 IRNUC 1H  
 CTEMP 20.6 c  
 SLVNT CDCL3  
 EXREF 0.00 ppm  
 BF 0.12 Hz  
 RGAIN 20

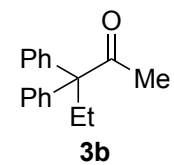

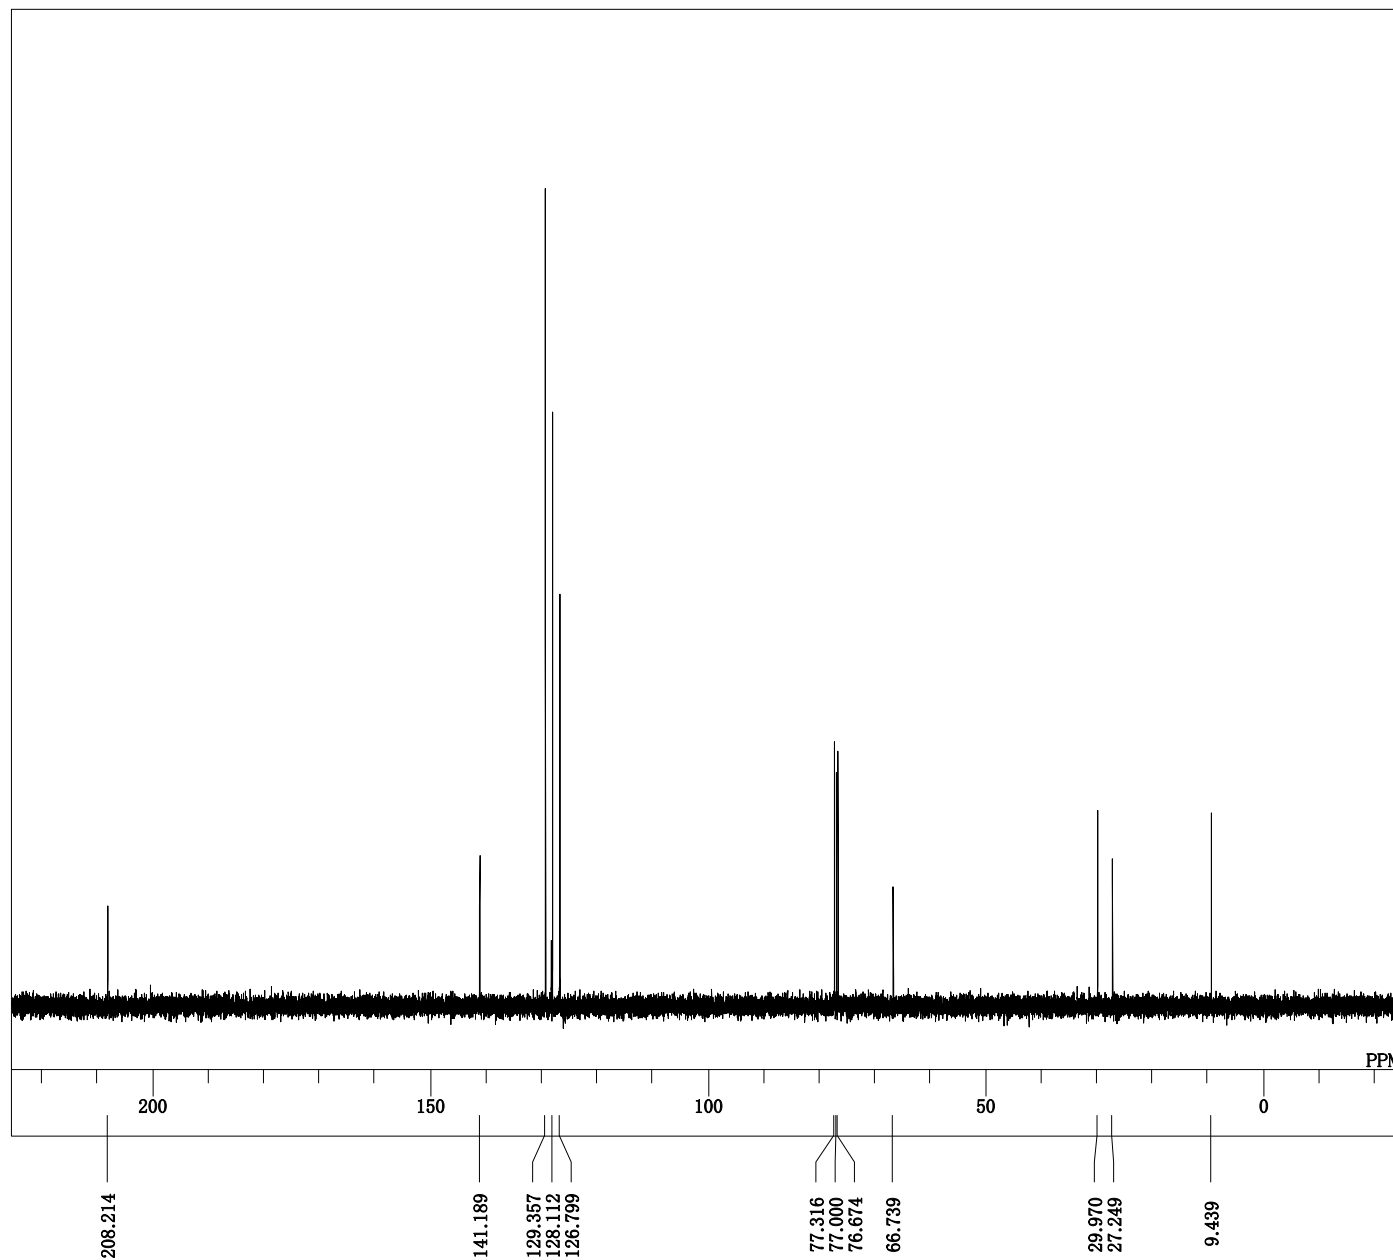

DFILE pro\_diol\_Me\_Et\_fr1\_Carbon.als  
 COMNT single pulse decoupled gated NOE  
 DATIM 2020-07-13 20:27:38  
 OBNUC 13C  
 EXMOD carbon\_jxp  
 OBFRQ 99.55 MHz  
 OBSET 5.13 KHz  
 OBFIN 0.98 Hz  
 POINT 26214  
 FREQU 25000.00 Hz  
 SCANS 17  
 ACQTM 1.0486 sec  
 PD 2.0000 sec  
 PW1 3.59 usec  
 IRNUC 1H  
 CTEMP 20.6 c  
 SLVNT CDCL3  
 EXREF 77.00 ppm  
 BF 0.12 Hz  
 RGAIN 50

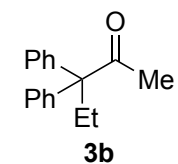

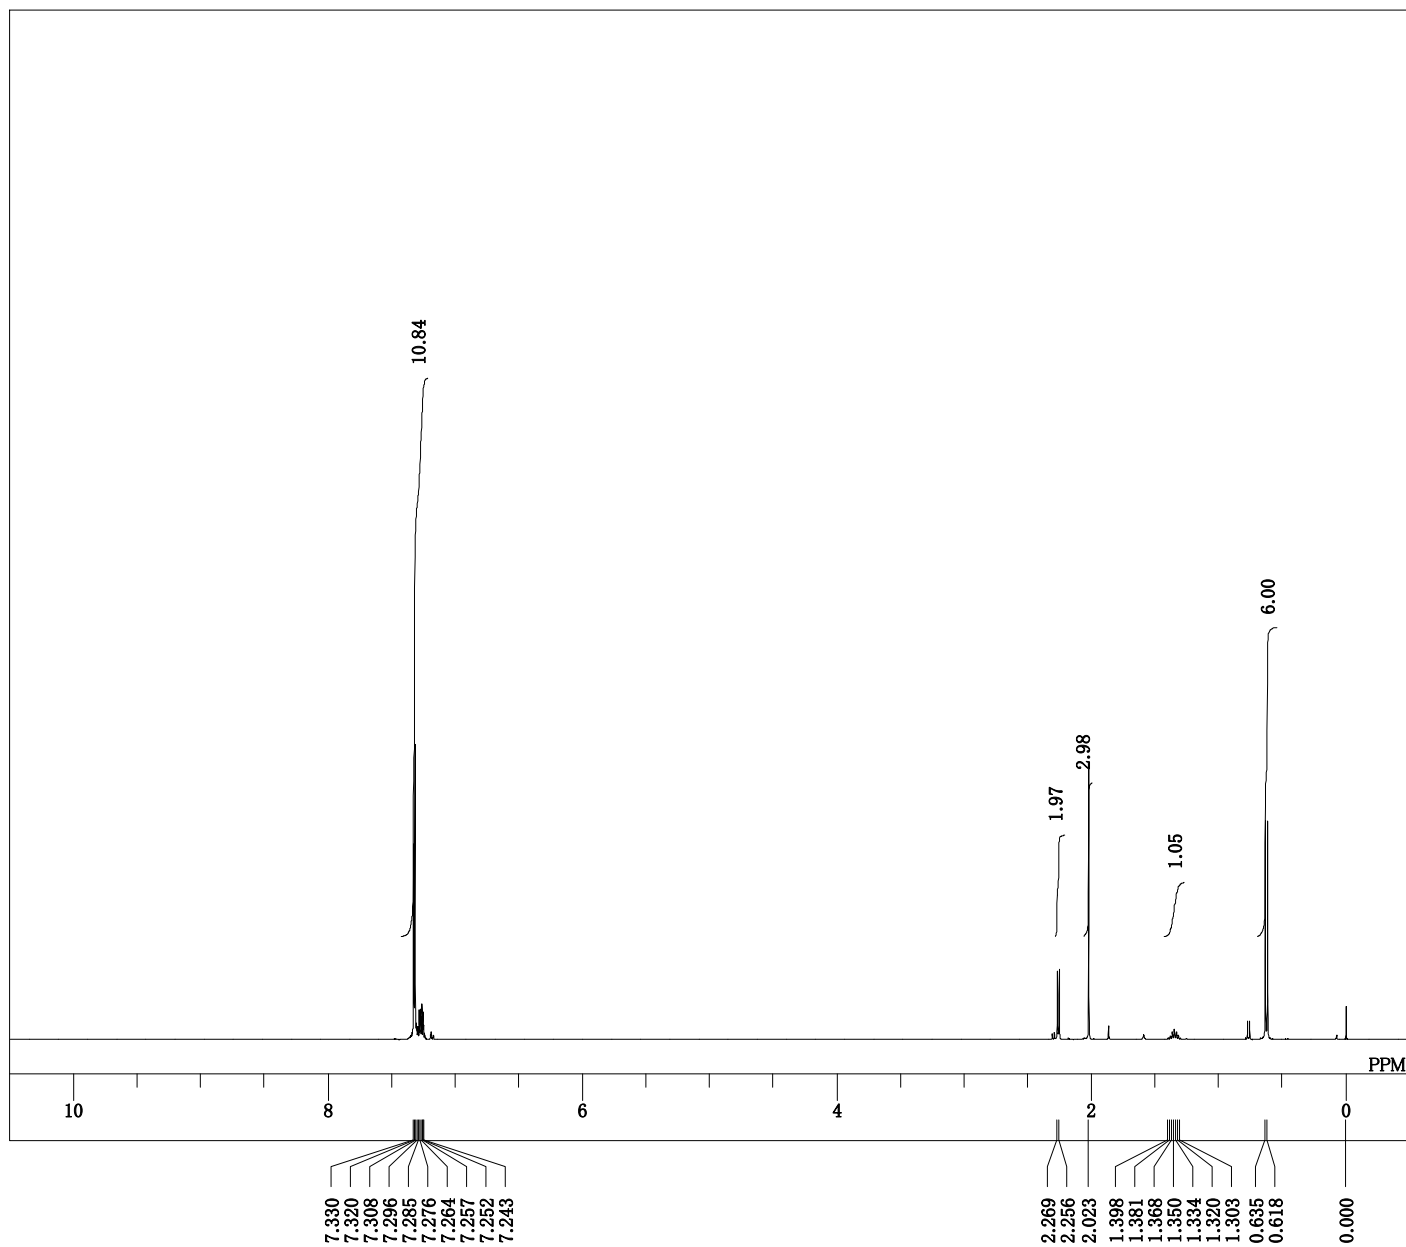

DFILE pro\_diol\_Me\_iBu\_fr2.2\_Proton.als  
 COMNT single\_pulse  
 DATIM 2020-03-31 13:17:20  
 OBNUC 1H  
 EXMOD proton.jxp  
 OBFRQ 395.88 MHz  
 OBSET 6.28 KHz  
 OBFIN 0.87 Hz  
 POINT 13107  
 FREQU 5938.24 Hz  
 SCANS 8  
 ACQTM 2.2073 sec  
 PD 5.0000 sec  
 PW1 3.14 usec  
 IRNUC 1H  
 CTEMP 19.6 c  
 SLVNT CDCL3  
 EXREF 0.00 ppm  
 BF 0.12 Hz  
 RGAIN 28

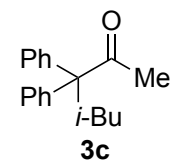

DFILE pro\_diol\_Me\_iBu\_fr2\_2\_Carbon.als  
 COMNT single pulse decoupled gated NOE  
 DATIM 2020-03-31 13:18:33  
 OBNUC 13C  
 EXMOD carbon.jxp  
 OBFRQ 99.55 MHz  
 OBSET 5.13 KHz  
 OBFIN 0.98 Hz  
 POINT 26214  
 FREQU 25000.00 Hz  
 SCANS 512  
 ACQTM 1.0486 sec  
 PD 2.0000 sec  
 PW1 3.59 usec  
 IRNUC 1H  
 CTEMP 20.2 c  
 SLVNT CDCL3  
 EXREF 77.00 ppm  
 BF 0.12 Hz  
 RGAIN 50

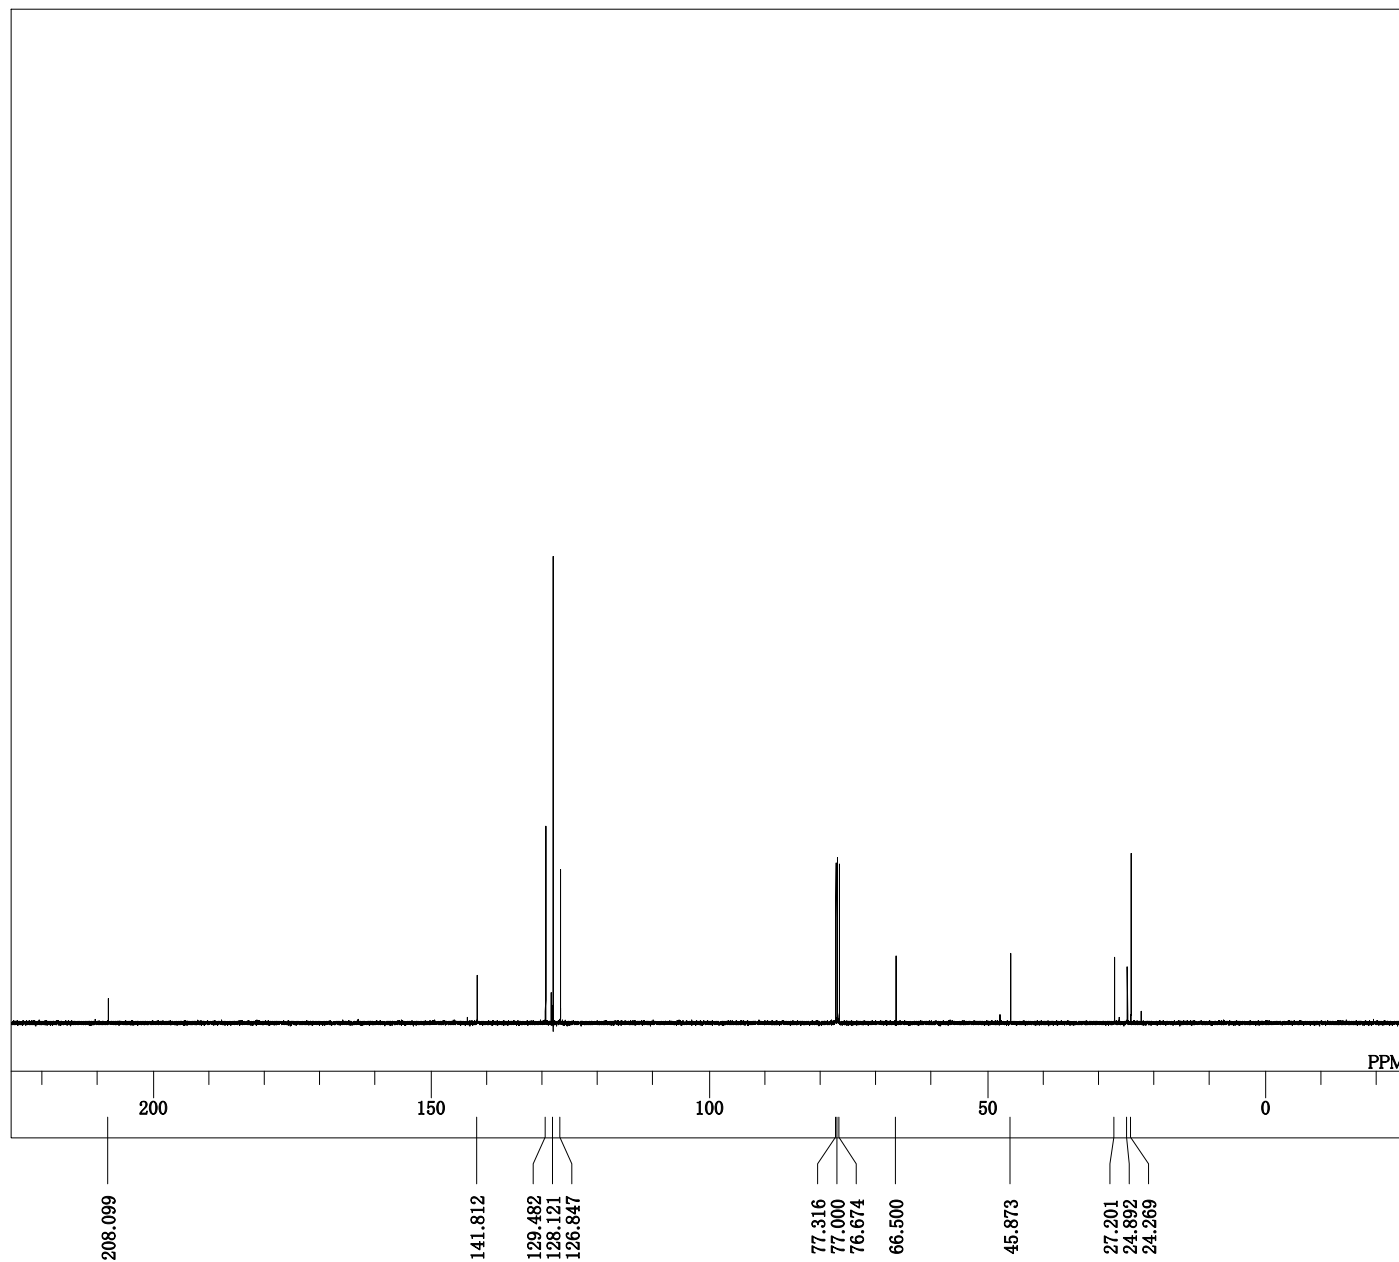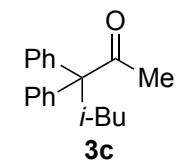

DFILE Ex616\_fr2-1-Proton-1-1.als  
 COMNT single\_pulse  
 DATIM 2020-03-31 12:45:15  
 OBNUC 1H  
 EXMOD proton\_jxp  
 OBFRQ 395.88 MHz  
 OBSET 6.28 KHz  
 OBFIN 0.87 Hz  
 POINT 13107  
 FREQU 5938.24 Hz  
 SCANS 8  
 ACQTM 2.2073 sec  
 PD 5.0000 sec  
 PW1 3.14 usec  
 IRNUC 1H  
 CTEMP 20.6 c  
 SLVNT CDCL3  
 EXREF 0.00 ppm  
 BF 0.12 Hz  
 RGAIN 30

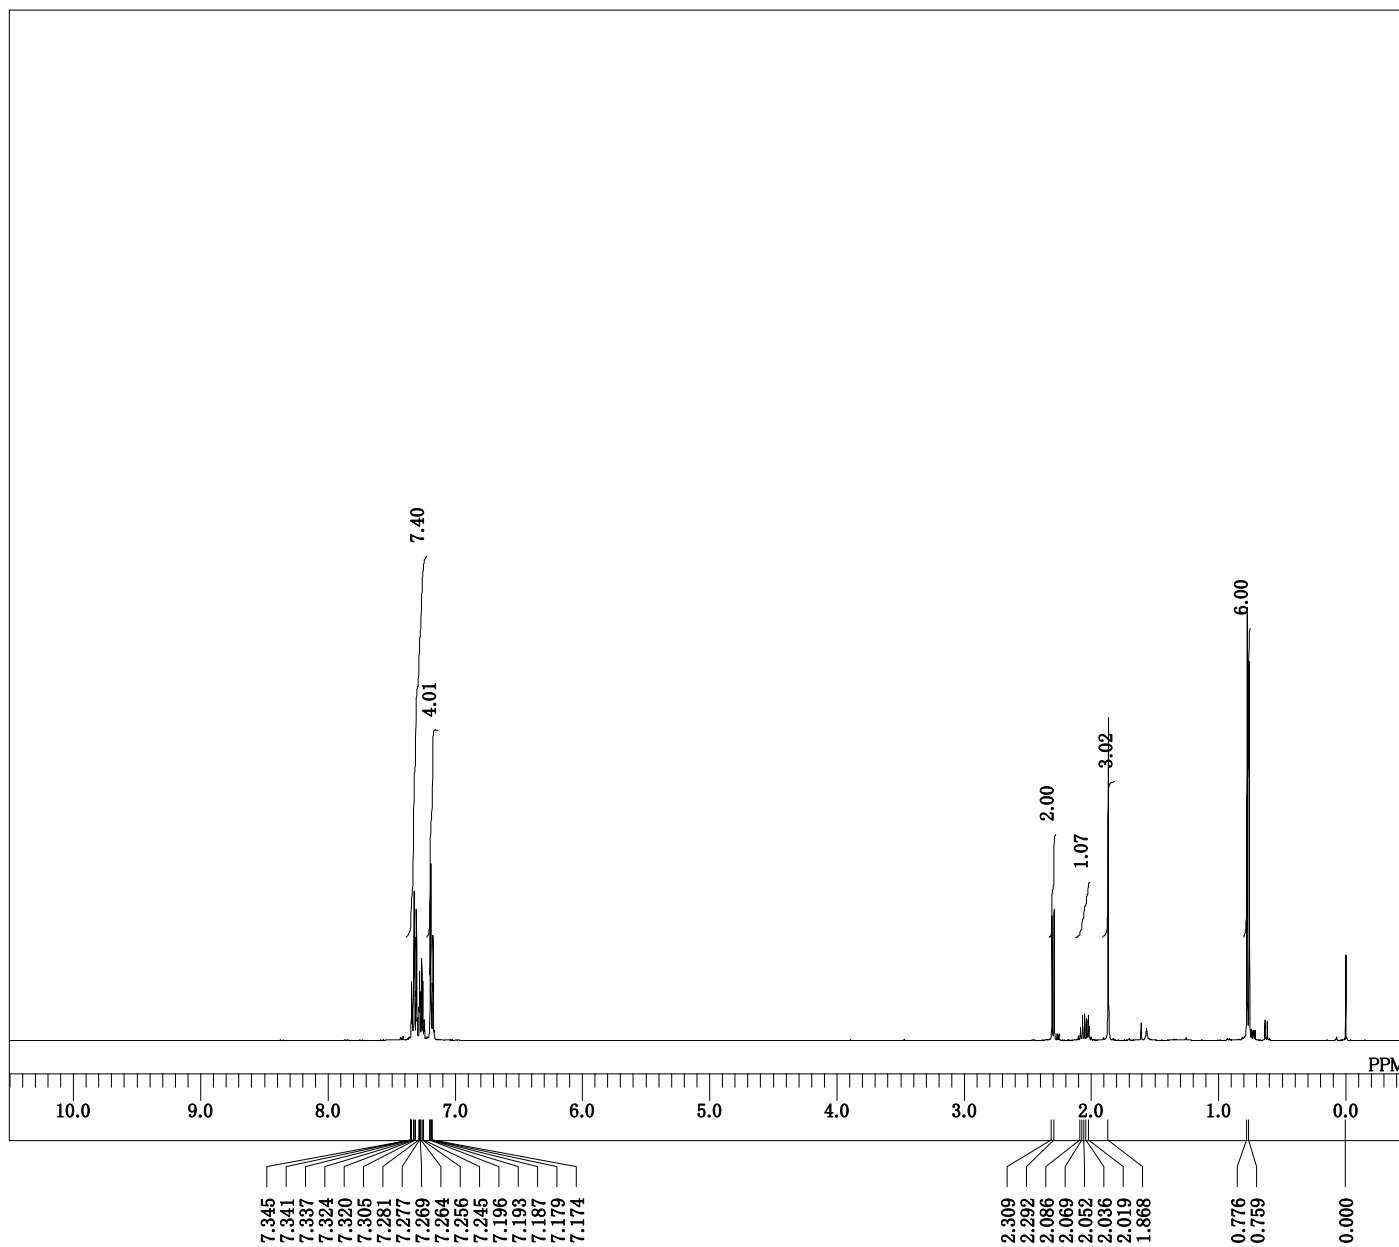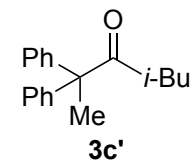

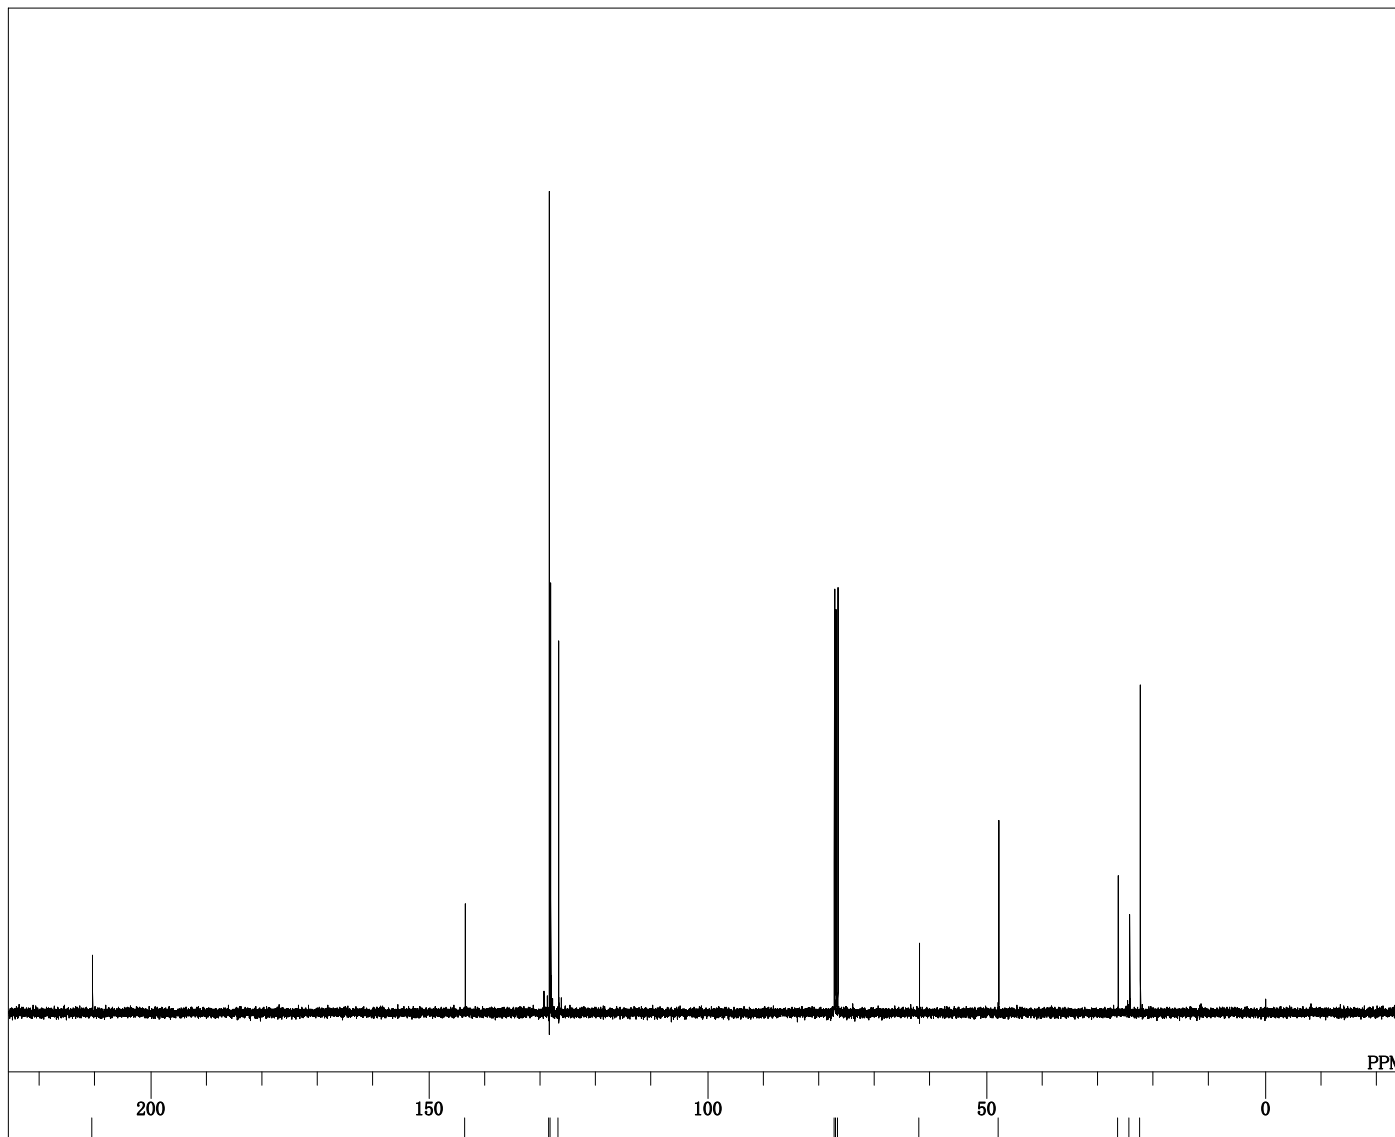

DFILE pro\_diol\_Me\_iBu\_fr2\_1\_Carbon.als  
 COMNT single pulse decoupled gated NOE  
 DATIM 2020-03-31 12:46:28  
 OBNUC 13C  
 EXMOD carbon.jxp  
 OBFRQ 99.55 MHz  
 OBSET 5.13 KHz  
 OBFIN 0.98 Hz  
 POINT 26214  
 FREQU 25000.00 Hz  
 SCANS 512  
 ACQTM 1.0486 sec  
 PD 2.0000 sec  
 PW1 3.59 usec  
 IRNUC 1H  
 CTEMP 20.0 c  
 SLVNT CDCL3  
 EXREF 77.00 ppm  
 BF 0.12 Hz  
 RGAIN 50

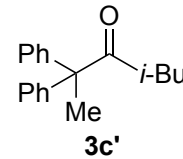

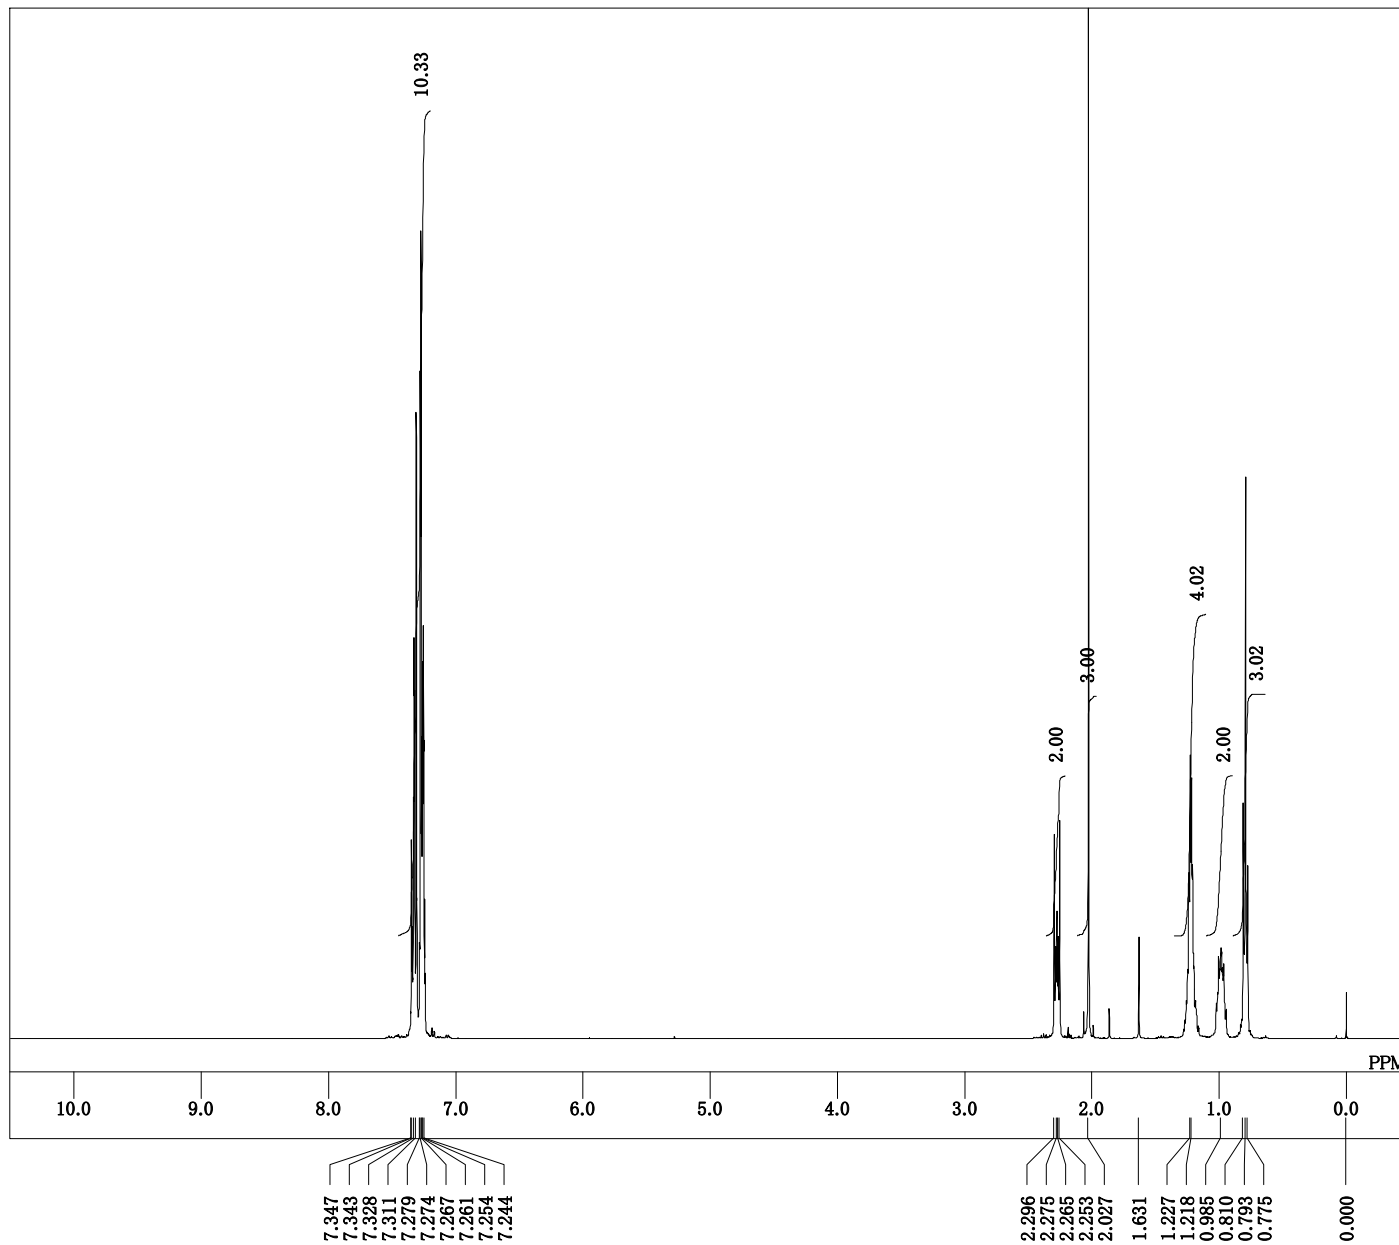

DFILE pro\_diol\_Me\_nPentyl\_fr2\_Proton.als  
 COMNT single\_pulse  
 DATIM 2020-07-05 14:23:09  
 OBNUC 1H  
 EXMOD proton.jxp  
 OBFRQ 395.88 MHz  
 OBSET 6.28 KHz  
 OBFIN 0.87 Hz  
 POINT 13107  
 FREQU 5938.24 Hz  
 SCANS 8  
 ACQTM 2.2073 sec  
 PD 5.0000 sec  
 PW1 3.14 usec  
 IRNUC 1H  
 CTEMP 20.8 c  
 SLVNT CDCL3  
 EXREF 0.00 ppm  
 BF 0.12 Hz  
 RGAIN 22

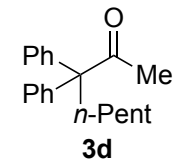

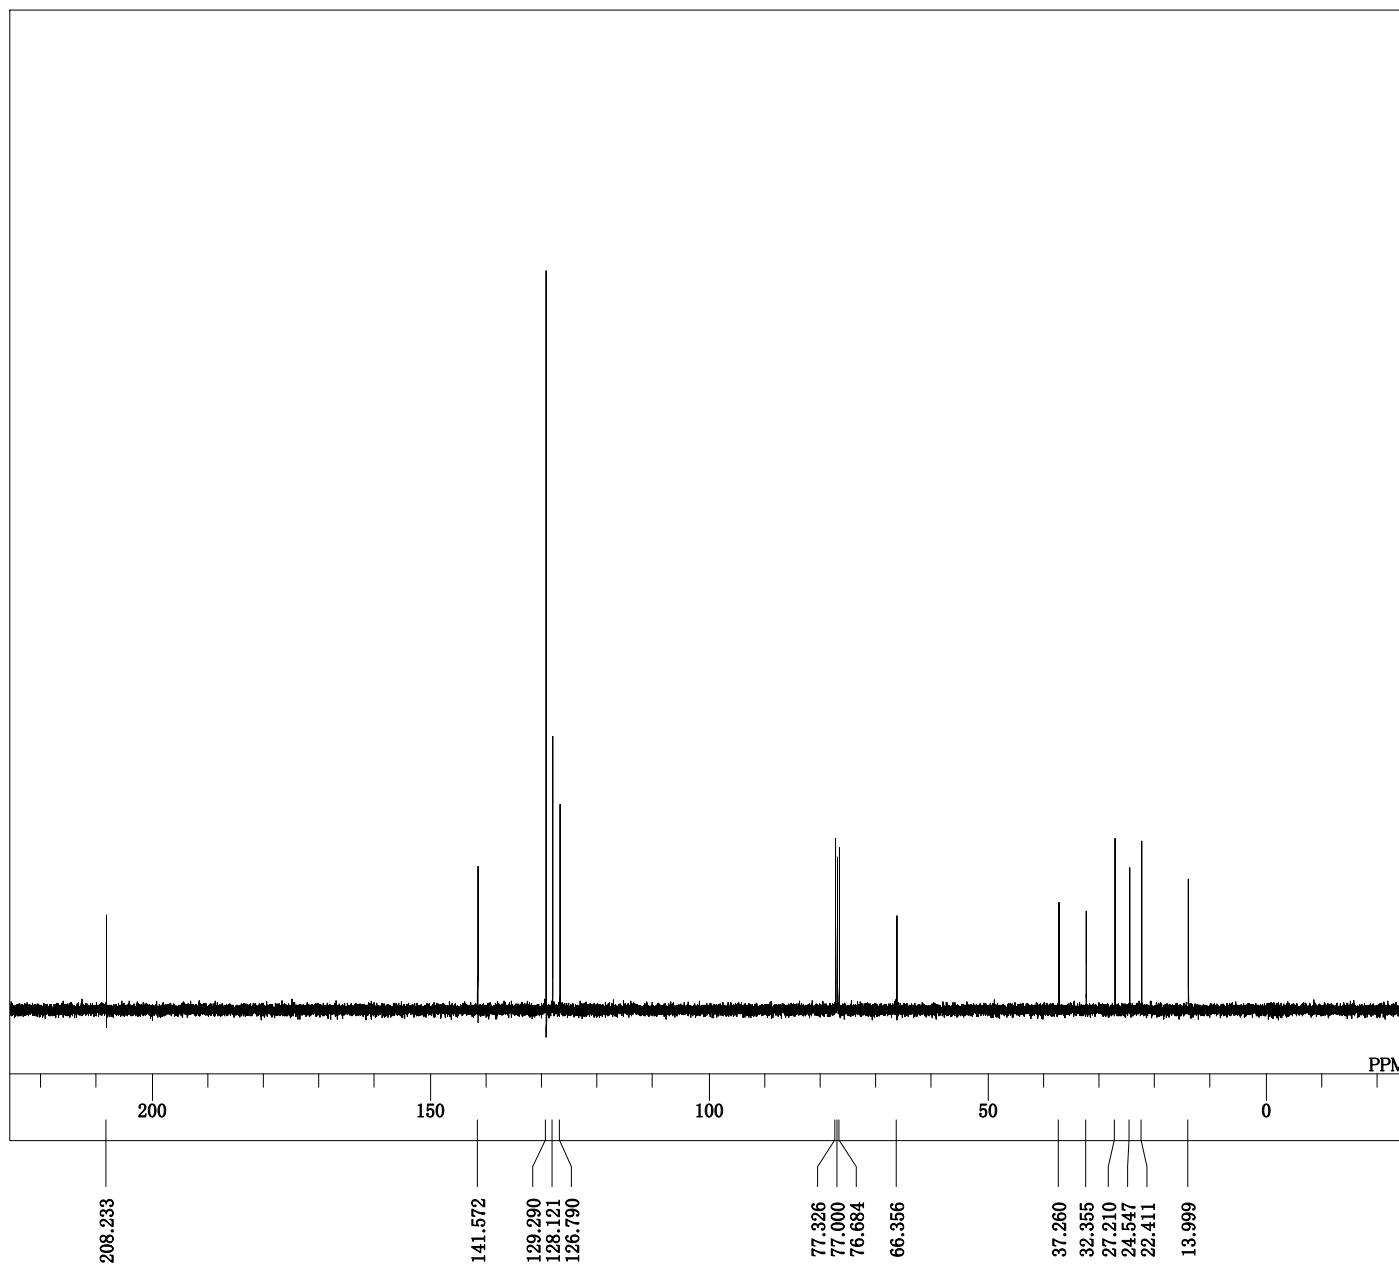

DFILE pro\_diol\_Me\_nPentyl\_fr2\_Carbon.als  
 COMNT single pulse decoupled gated NOE  
 DATIM 2020-07-05 14:24:21  
 OBNUC 13C  
 EXMOD carbon.jxp  
 OBFRQ 99.55 MHz  
 OBSET 5.13 KHz  
 OBFIN 0.98 Hz  
 POINT 26214  
 FREQU 25000.00 Hz  
 SCANS 59  
 ACQTM 1.0486 sec  
 PD 2.0000 sec  
 PW1 3.59 usec  
 IRNUC 1H  
 CTEMP 20.4 c  
 SLVNT CDCL3  
 EXREF 77.00 ppm  
 BF 0.12 Hz  
 RGAIN 50

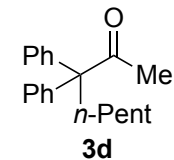



DFILE pro\_diol\_Me\_nPentan\_fr1\_Proton.als  
 COMNT single\_pulse  
 DATIM 2020-12-22 22:24:14  
 OBNUC 1H  
 EXMOD proton.jxp  
 OBFRQ 395.88 MHz  
 OBSET 6.28 KHz  
 OBFIN 0.87 Hz  
 POINT 16384  
 FREQU 7422.80 Hz  
 SCANS 8  
 ACQTM 2.2073 sec  
 PD 5.0000 sec  
 PW1 3.14 usec  
 IRNUC 1H  
 CTEMP 19.2 c  
 SLVNT CDCL3  
 EXREF 0.00 ppm  
 BF 0.72 Hz  
 RGAIN 40

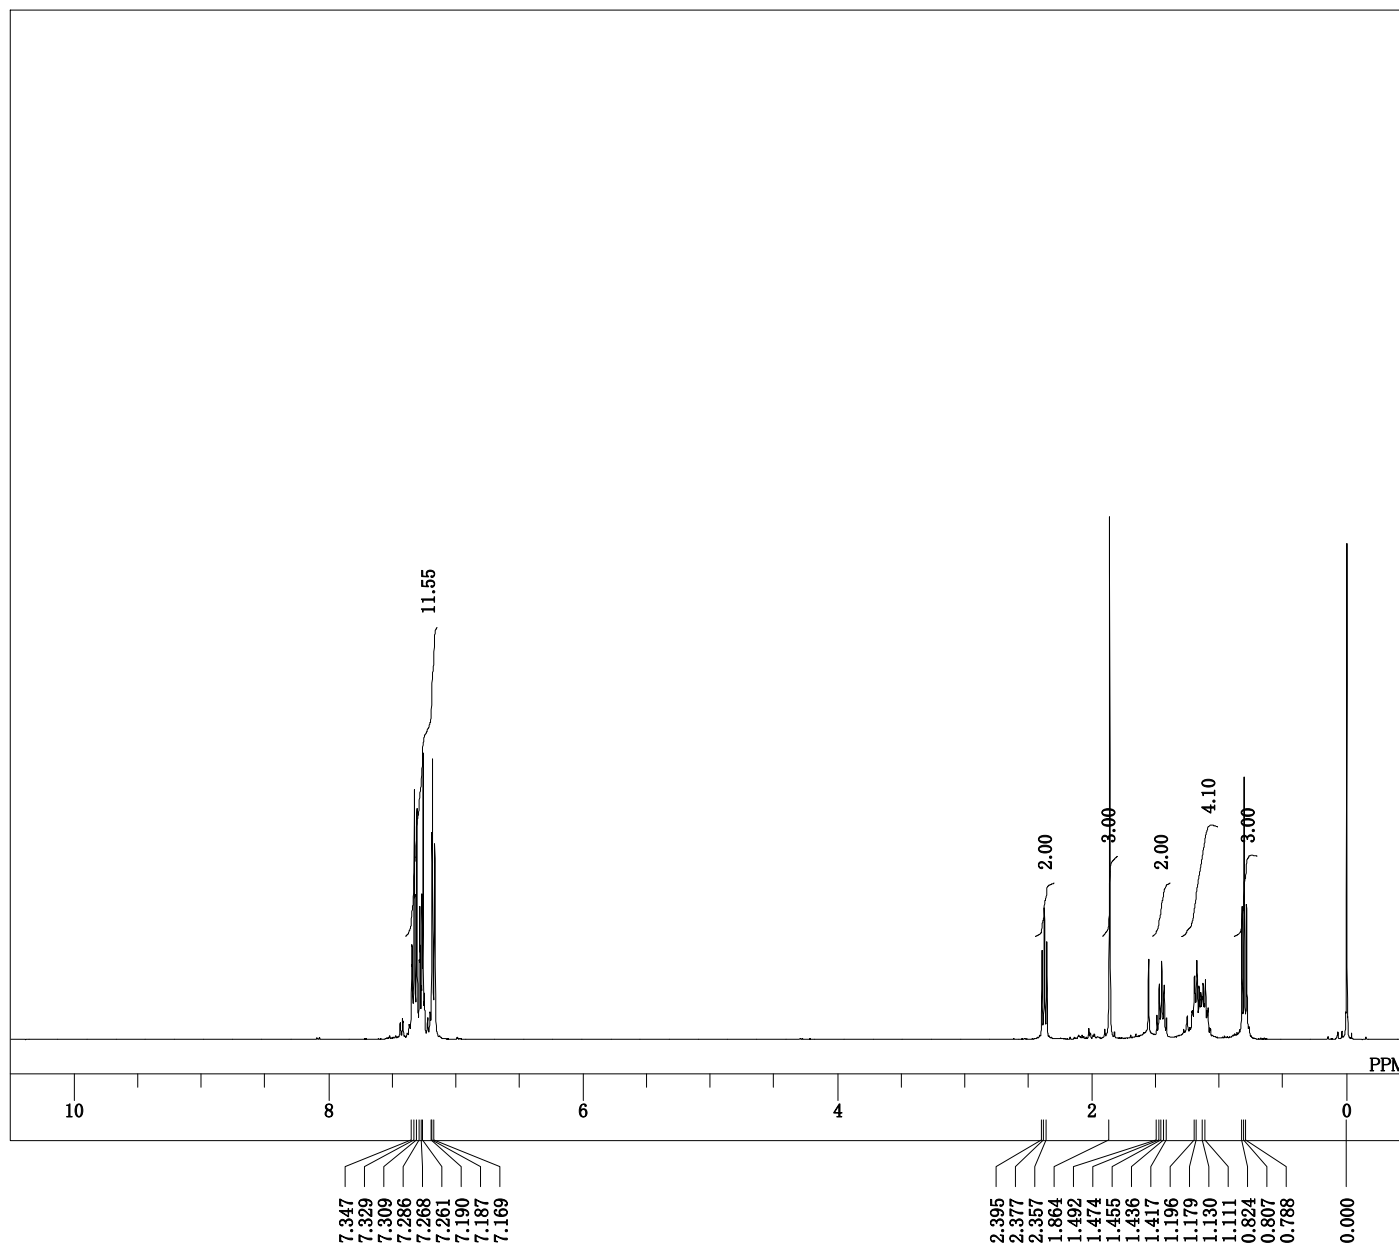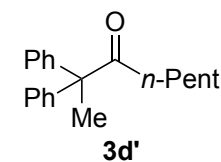

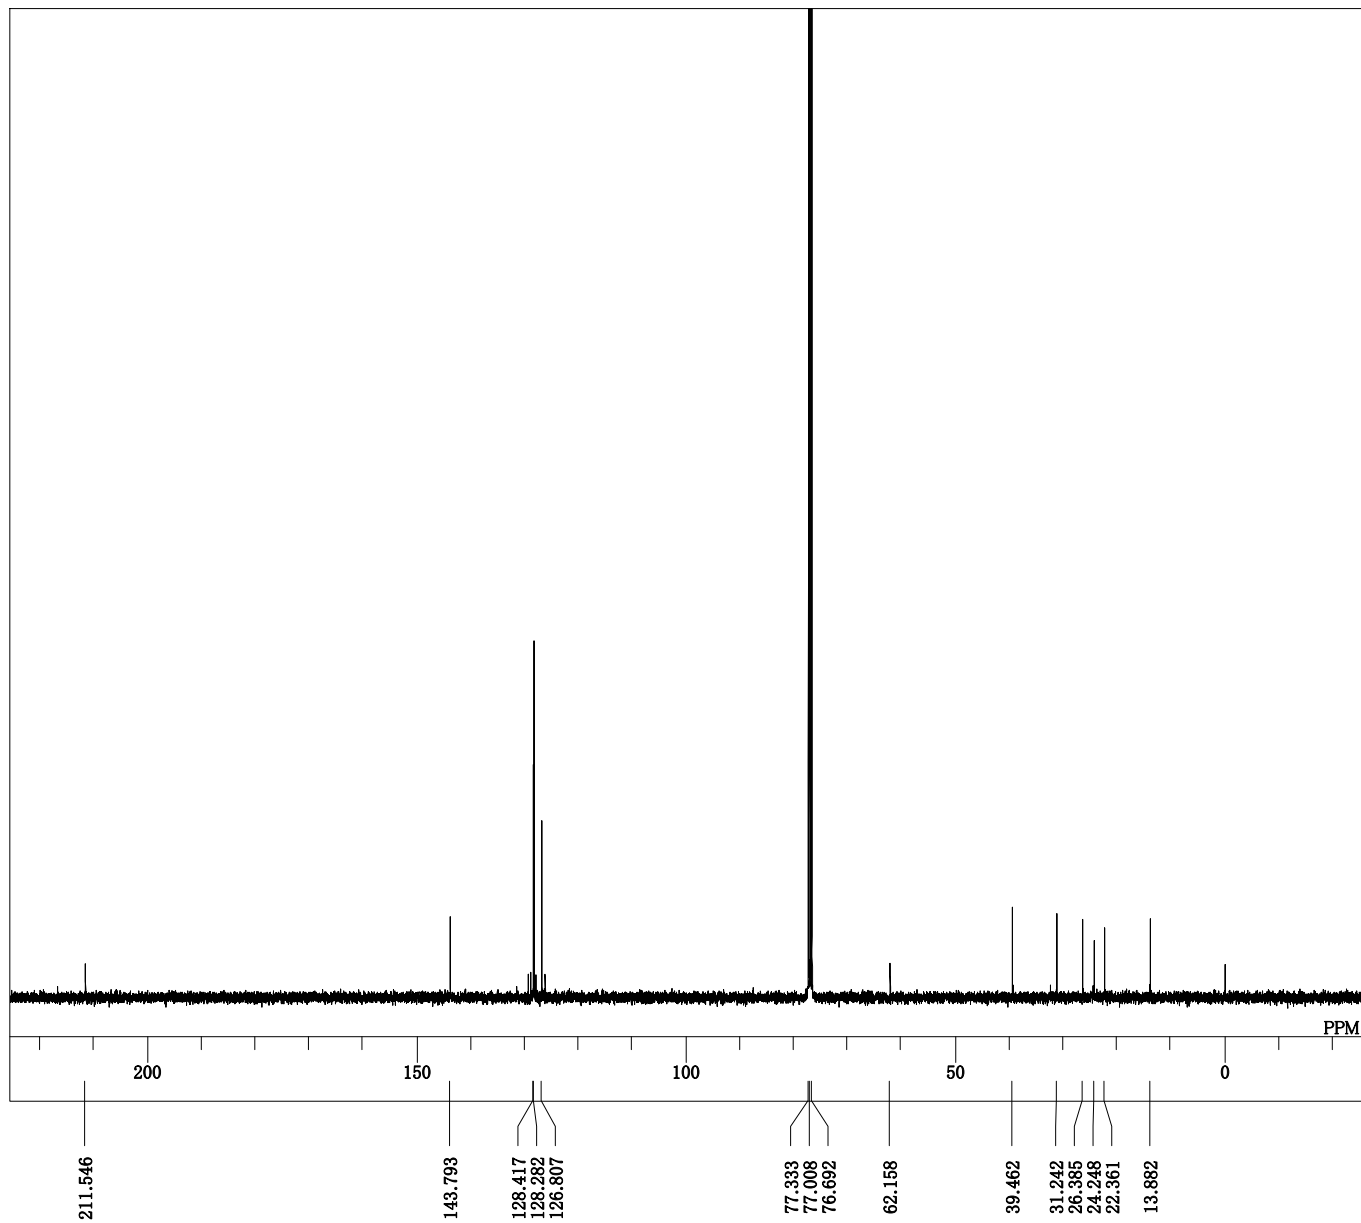

DFILE pro\_diol\_Me\_nPentylfr1\_Carbon.als  
 COMNT single pulse decoupled gated NOE  
 DATIM 2020-12-22 22:25:27  
 OBNUC 13C  
 EXMOD carbon.jxp  
 OBFRQ 99.55 MHz  
 OBSET 5.13 KHz  
 OBFIN 0.98 Hz  
 POINT 26214  
 FREQU 25000.00 Hz  
 SCANS 1735  
 ACQTM 1.0486 sec  
 PD 2.0000 sec  
 PW1 3.59 usec  
 IRNUC 1H  
 CTEMP 18.5 c  
 SLVNT CDCL3  
 EXREF 0.00 ppm  
 BF 0.72 Hz  
 RGAIN 50

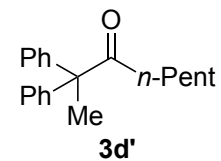

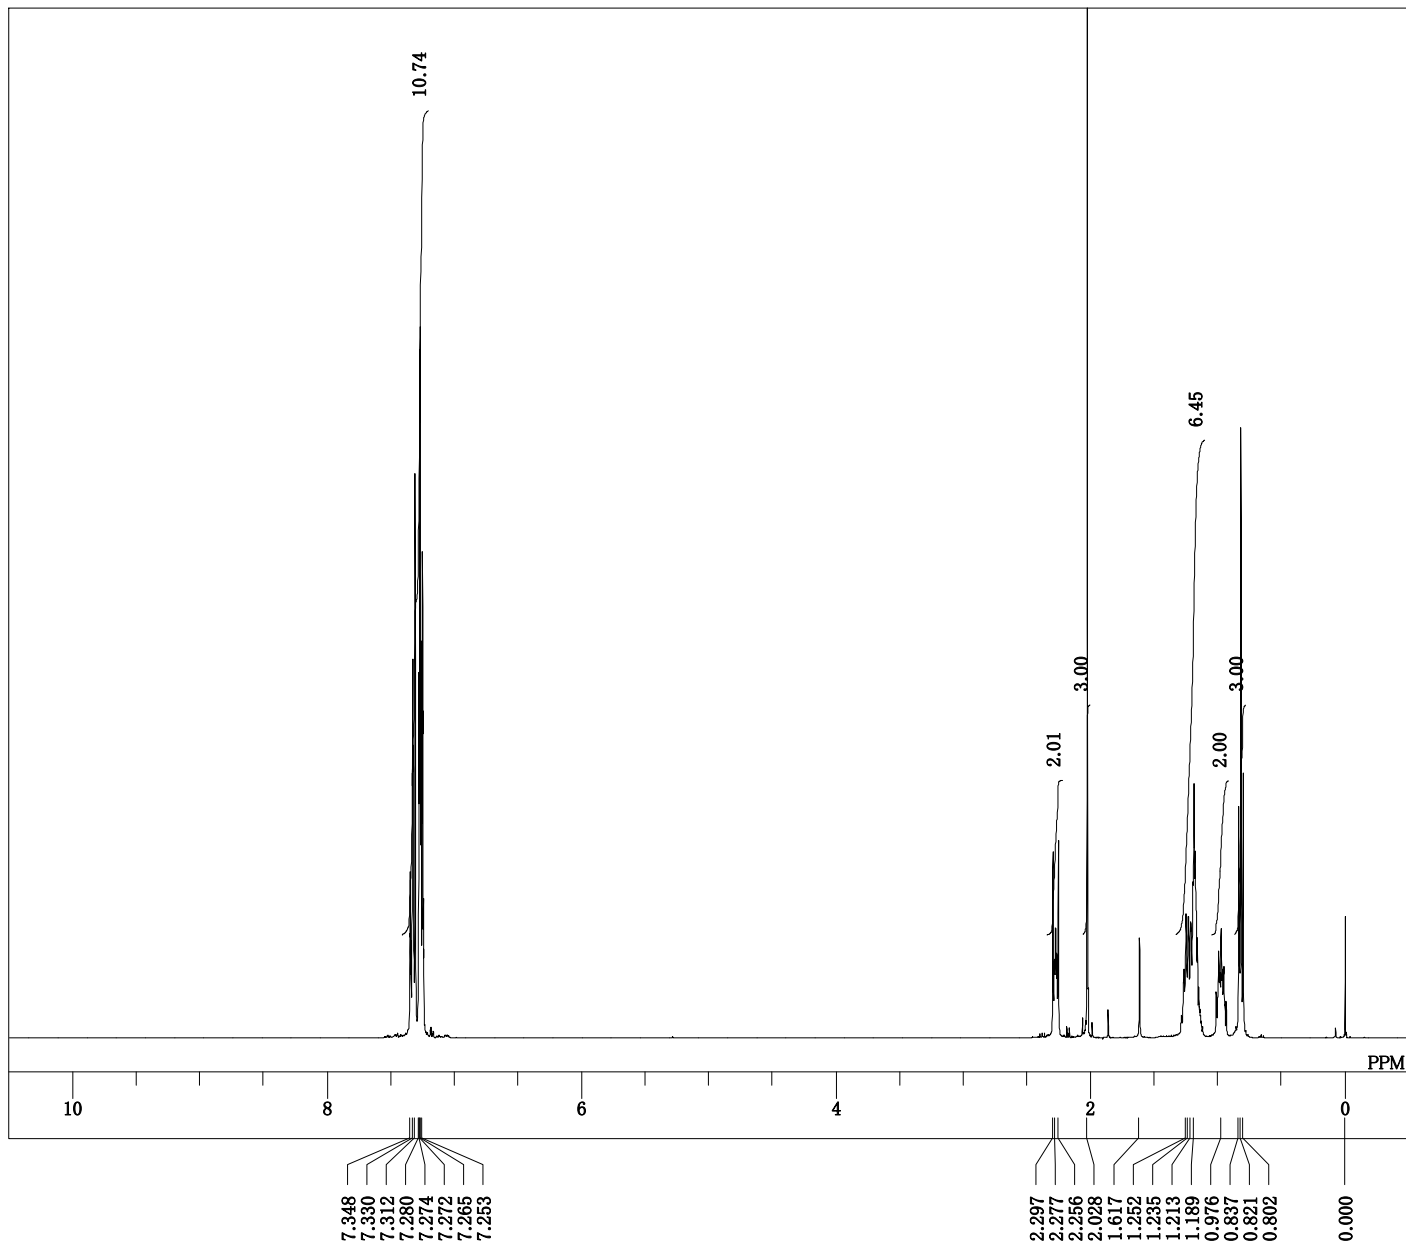

DFILE pro\_diol\_Me\_nHexyl\_fr2\_Proton.als  
 COMNT single\_pulse  
 DATIM 2020-07-15 16:38:56  
 OBNUC 1H  
 EXMOD proton.jxp  
 OBFRQ 395.88 MHz  
 OBSET 6.28 KHz  
 OBFIN 0.87 Hz  
 POINT 13107  
 FREQU 5938.24 Hz  
 SCANS 8  
 ACQTM 2.2073 sec  
 PD 5.0000 sec  
 PW1 3.14 usec  
 IRNUC 1H  
 CTEMP 20.7 c  
 SLVNT CDCL3  
 EXREF 0.00 ppm  
 BF 0.12 Hz  
 RGAIN 24

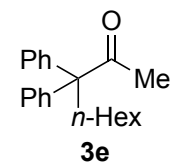

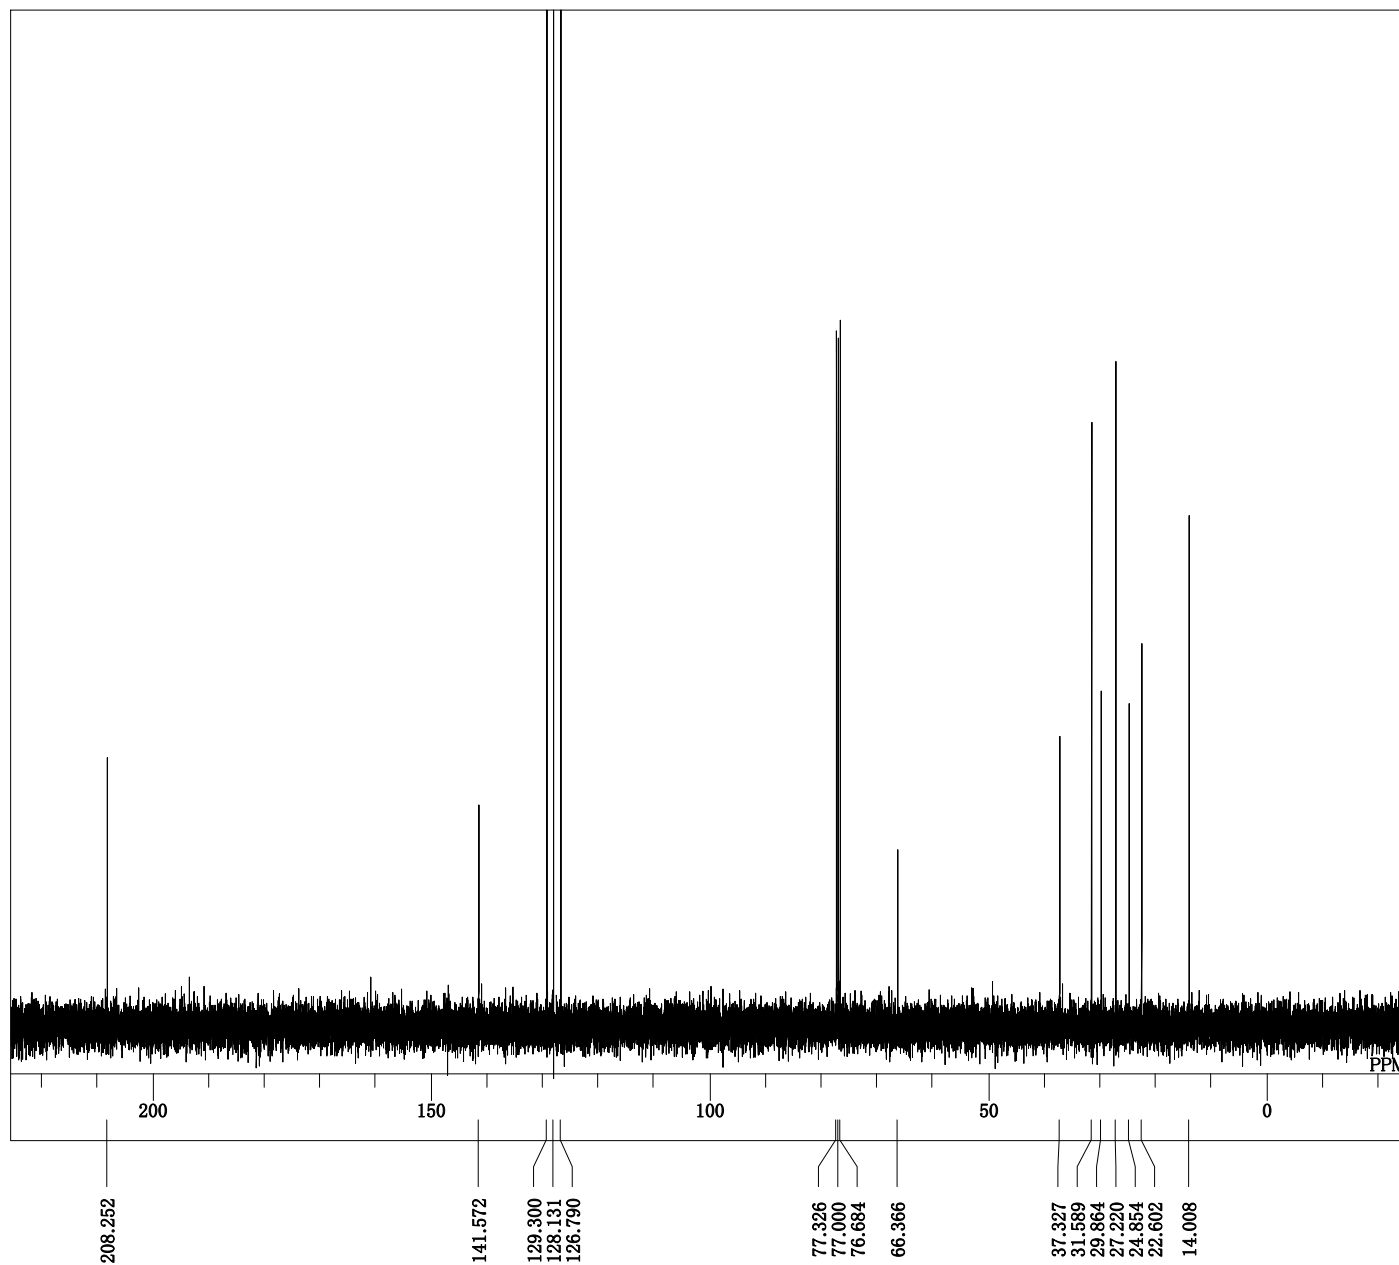

DFILE pro\_diol\_Me\_nHexyl\_fr2\_Carbon.als  
 COMNT single pulse decoupled gated NOE  
 DATIM 2020-07-15 16:40:09  
 OBNUC <sup>13</sup>C  
 EXMOD carbon.jxp  
 OBFRQ 99.55 MHz  
 OBSET 5.13 KHz  
 OBFIN 0.98 Hz  
 POINT 26214  
 FREQU 25000.00 Hz  
 SCANS 31  
 ACQTM 1.0486 sec  
 PD 2.0000 sec  
 PW1 3.59 usec  
 IRNUC <sup>1</sup>H  
 CTEMP 20.7 c  
 SLVNT CDCL3  
 EXREF 77.00 ppm  
 BF 0.12 Hz  
 RGAIN 50

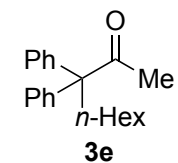

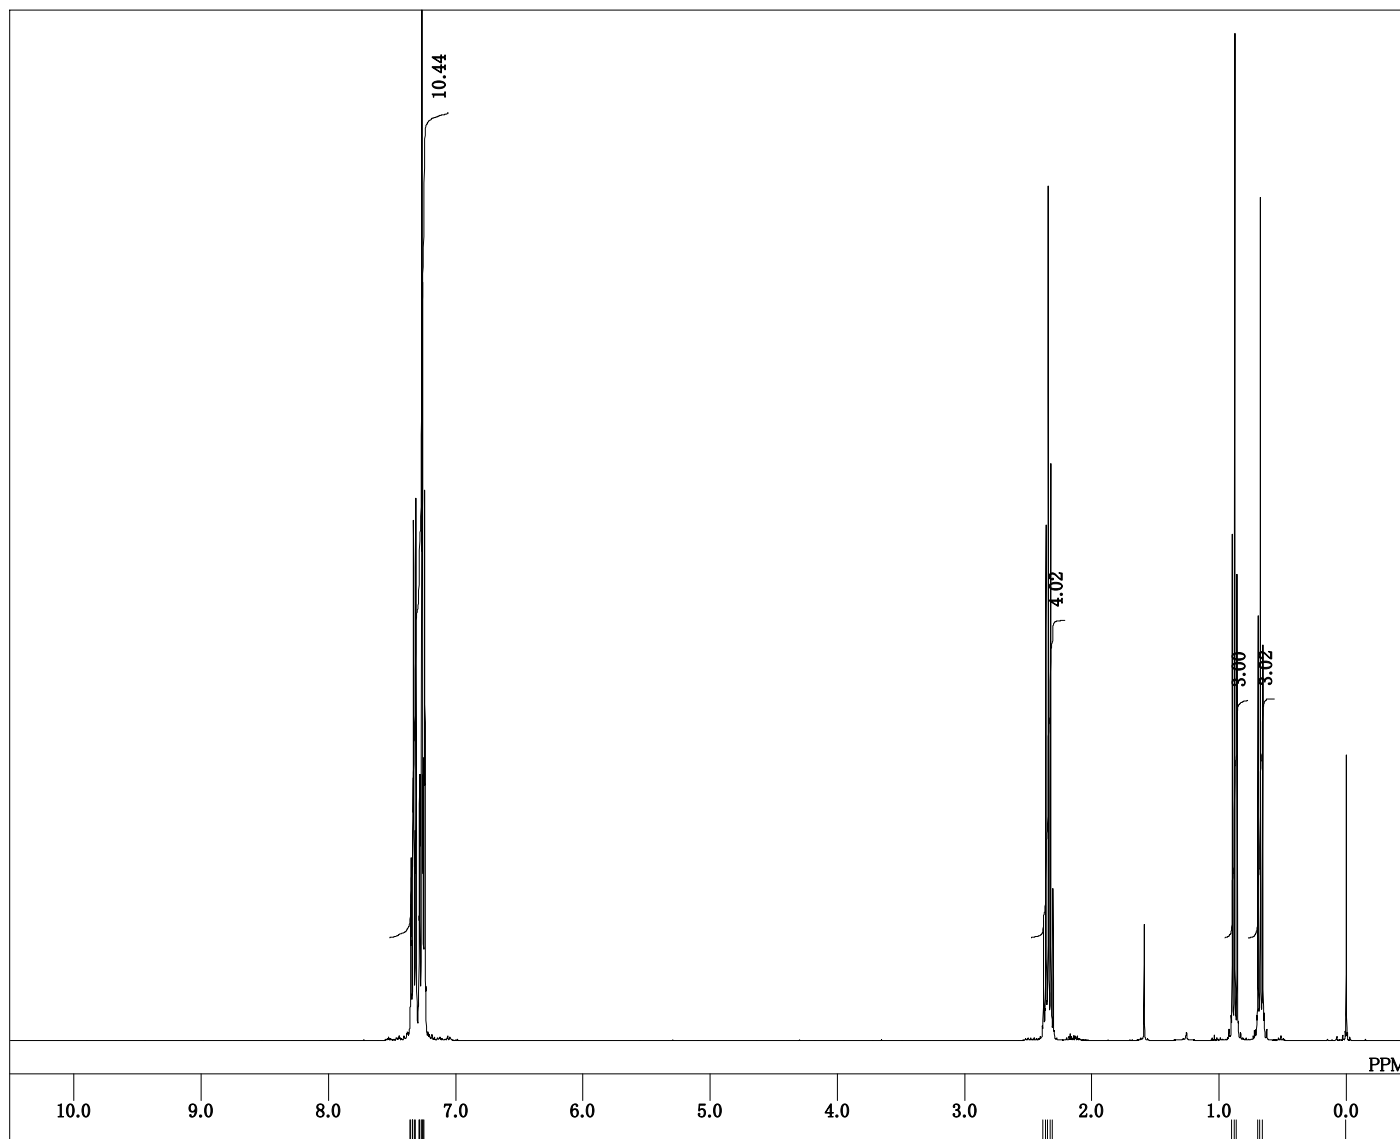

7.553  
7.349  
7.336  
7.331  
7.317  
7.313  
7.283  
7.280  
7.266  
7.261  
7.256  
7.249  
7.244

2.379  
2.360  
2.341  
2.323  
2.304

0.895  
0.877  
0.858  
0.694  
0.675  
0.656

0.000

DFILE pro\_diol\_Et\_Et\_Proton.als  
 COMNT single\_pulse  
 DATIM 2020-07-13 13:09:46  
 OBNUC 1H  
 EXMOD proton.jp  
 OBFRQ 395.88 MHz  
 OBSET 6.28 KHz  
 OBFIN 0.87 Hz  
 POINT 13107  
 FREQU 5938.24 Hz  
 SCANS 8  
 ACQTM 2.2073 sec  
 PD 5.0000 sec  
 PW1 3.14 usec  
 IRNUC 1H  
 CTEMP 20.6 c  
 SLVNT CDCL3  
 EXREF 0.00 ppm  
 BF 0.12 Hz  
 RGAIN 28

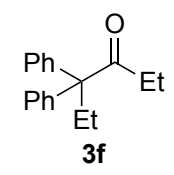

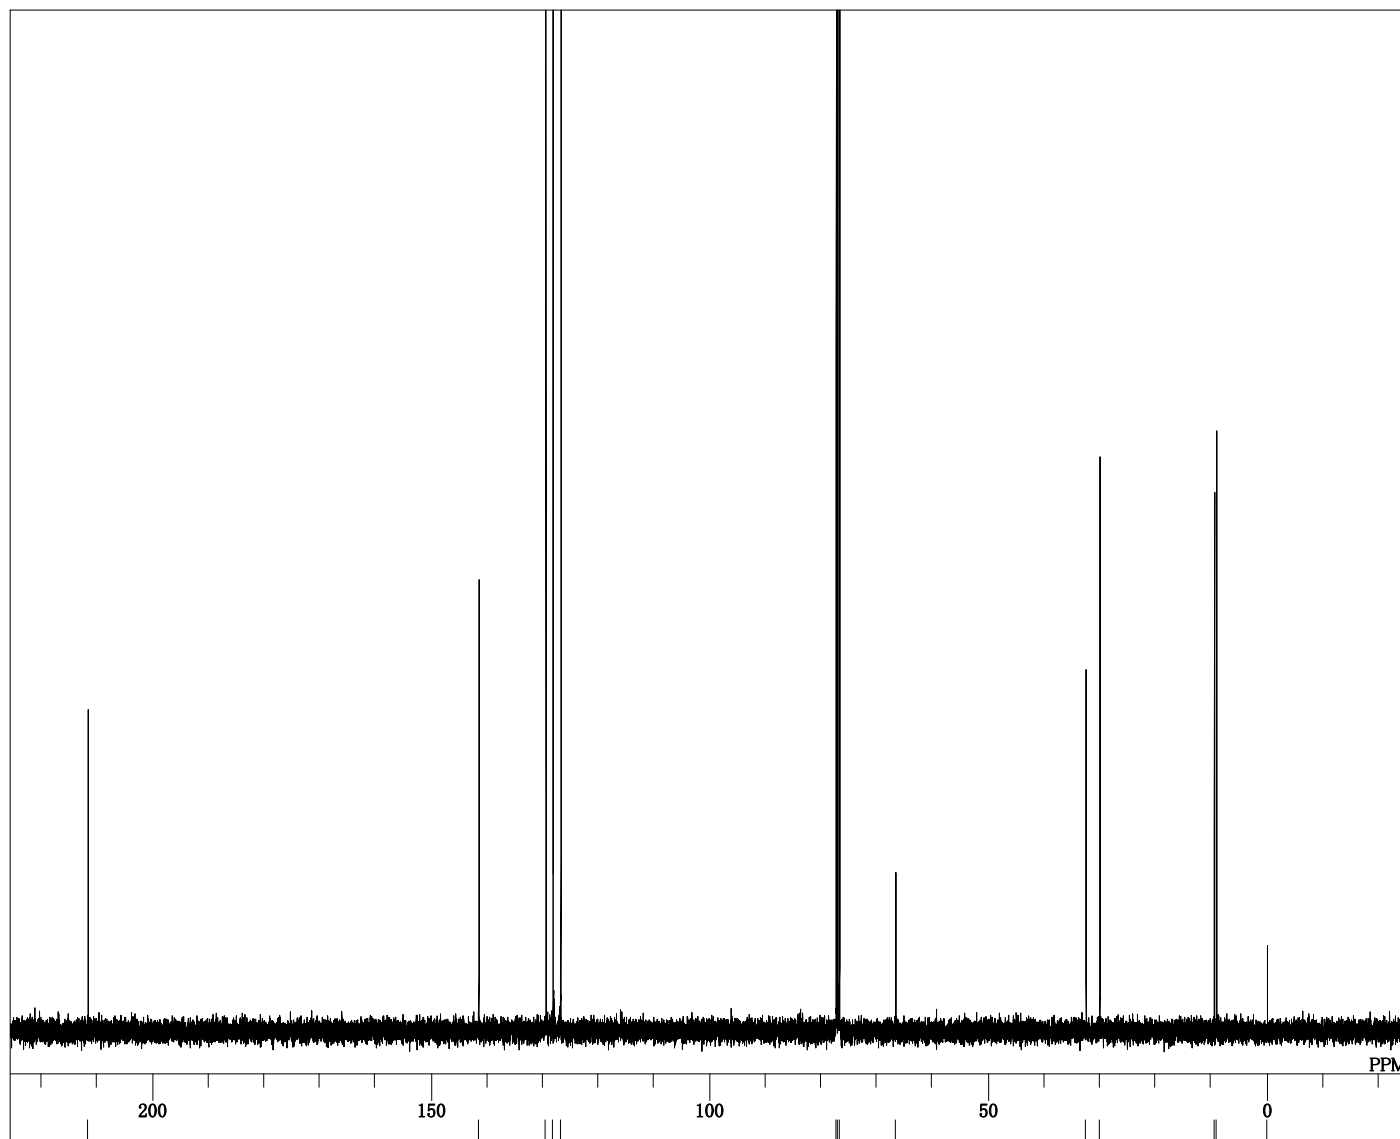

DFILE pro\_diol\_Et\_Et\_Carbon.als  
 COMNT single pulse decoupled gated NOE  
 DATIM 2020-07-13 13:10:59  
 OBNUC 13C  
 EXMOD carbon.jxp  
 OBFRQ 99.55 MHz  
 OBSET 5.13 KHz  
 OBFIN 0.98 Hz  
 POINT 26214  
 FREQU 25000.00 Hz  
 SCANS 523  
 ACQTM 1.0486 sec  
 PD 2.0000 sec  
 PW1 3.59 usec  
 IRNUC 1H  
 CTEMP 20.6 c  
 SLVNT CDCL3  
 EXREF 0.00 ppm  
 BF 0.12 Hz  
 RGAIN 50



211.546  
 141.494  
 129.422  
 128.139  
 126.769  
 77.343  
 77.027  
 76.701  
 66.632  
 32.478  
 30.044  
 9.475  
 9.082  
 0.000

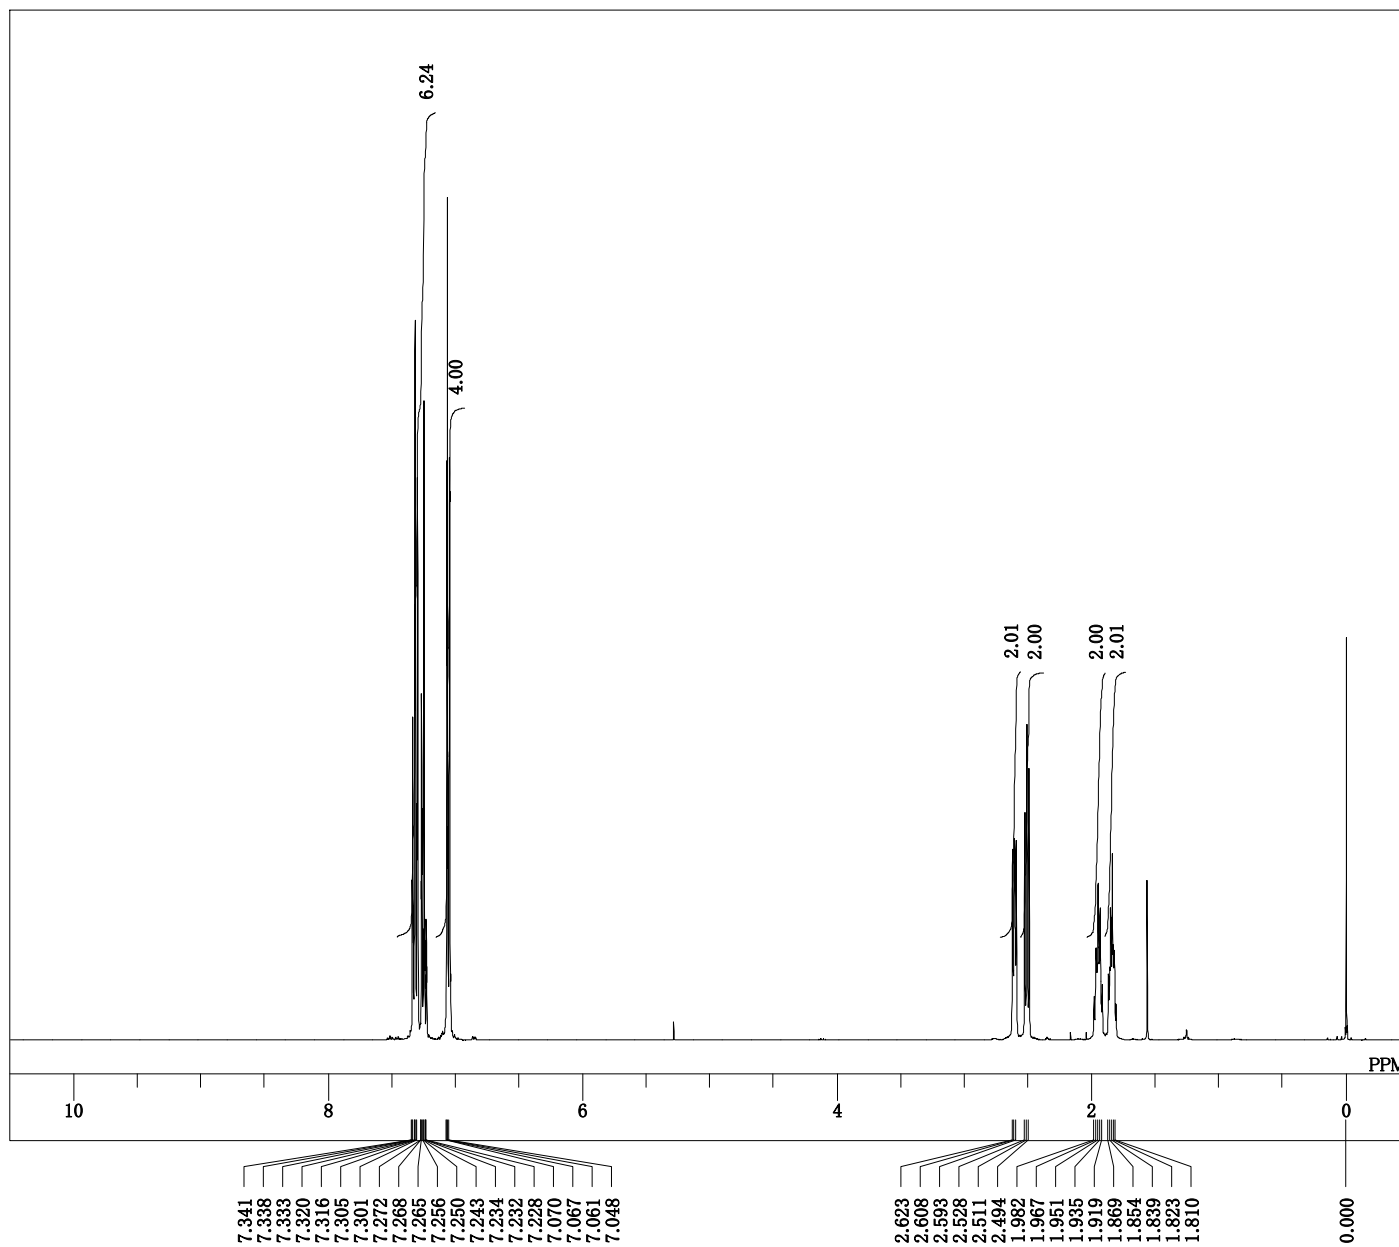

DFILE pro\_diol\_cyc\_pentyl\_Proton.als  
 COMNT single\_pulse  
 DATIM 2020-07-13 13:42:34  
 OBNUC 1H  
 EXMOD proton\_jxp  
 OBFRQ 395.88 MHz  
 OBSET 6.28 KHz  
 OBFIN 0.87 Hz  
 POINT 13107  
 FREQU 5938.24 Hz  
 SCANS 8  
 ACQTM 2.2073 sec  
 PD 5.0000 sec  
 PW1 3.14 usec  
 IRNUC 1H  
 CTEMP 20.6 c  
 SLVNT CDCL3  
 EXREF 0.00 ppm  
 BF 0.12 Hz  
 RGAIN 30

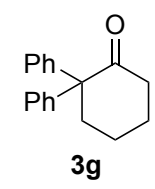

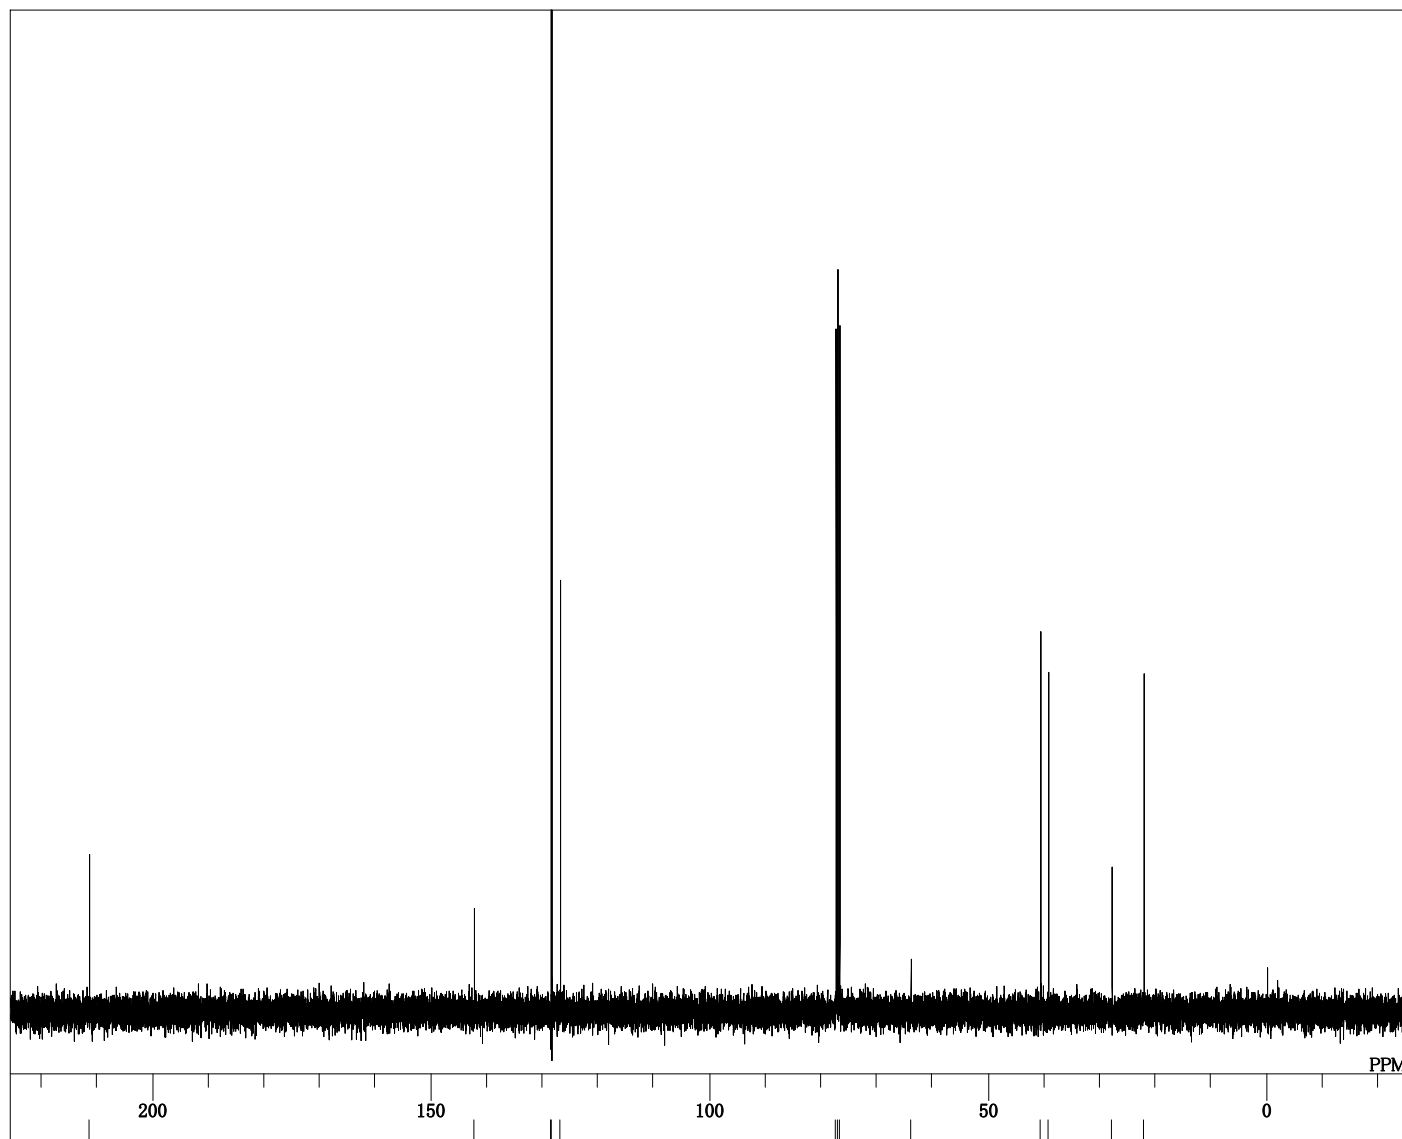

DFILE pro\_diol\_cyc\_pentyl\_Carbon.als  
 COMNT single pulse decoupled gated NOE  
 DATIM 2020-07-13 13:43:46  
 OBNUC 13C  
 EXMOD carbon.jxp  
 OBFRQ 99.55 MHz  
 OBSET 5.13 KHz  
 OBFIN 0.98 Hz  
 POINT 26214  
 FREQU 25000.00 Hz  
 SCANS 64  
 ACQTM 1.0486 sec  
 PD 2.0000 sec  
 PW1 3.59 usec  
 IRNUC 1H  
 CTEMP 20.7 c  
 SLVNT CDCL3  
 EXREF 77.00 ppm  
 BF 0.12 Hz  
 RGAIN 50

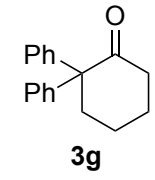

211.337

142.262

128.524  
128.323  
126.818

77.316  
77.000  
76.674

63.884

40.661  
39.148

27.766  
22.085



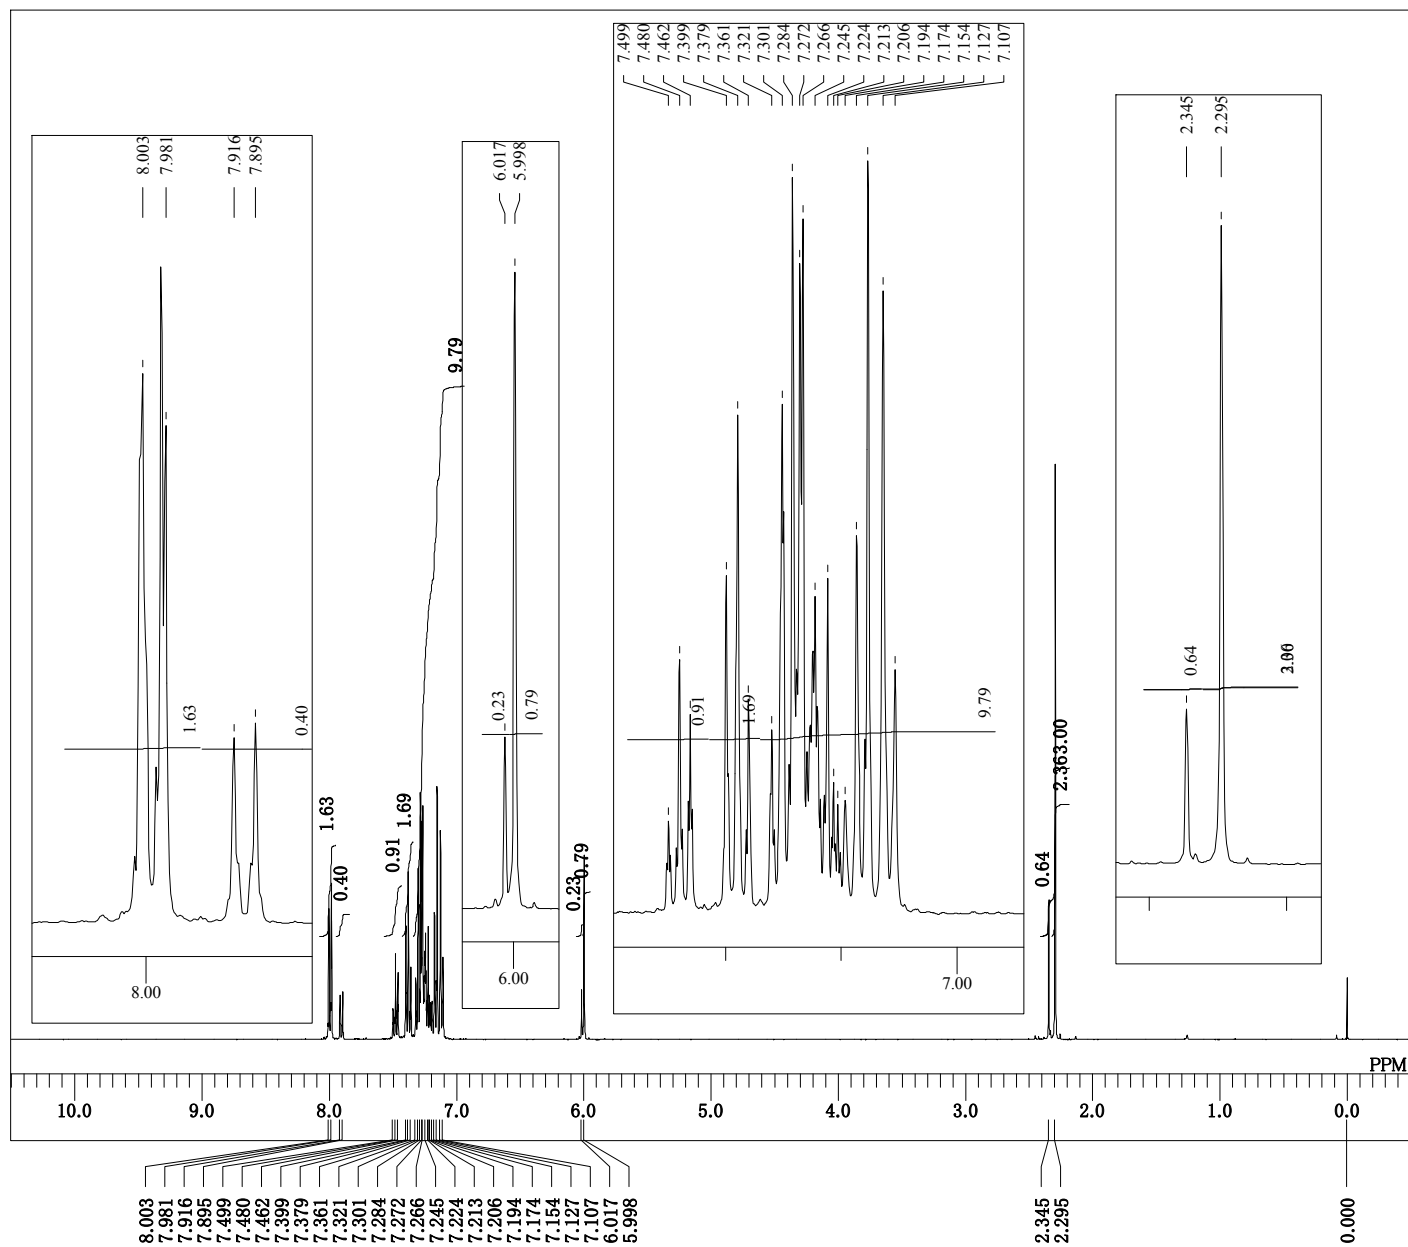

DFILE pro\_diol\_H\_pMe.proton.als  
 COMNT single\_pulse  
 DATIM 2021-01-12 15:15:30  
 OBNUC 1H  
 EXMOD proton.jp  
 OBFRQ 395.88 MHz  
 OBSET 6.28 KHz  
 OBFIN 0.87 Hz  
 POINT 13107  
 FREQU 5938.24 Hz  
 SCANS 8  
 ACQTM 2.2073 sec  
 PD 5.0000 sec  
 PW1 3.14 usec  
 IRNUC 1H  
 CTEMP 19.7 c  
 SLVNT CDCL3  
 EXREF 0.00 ppm  
 BF 0.12 Hz  
 RGAIN 24

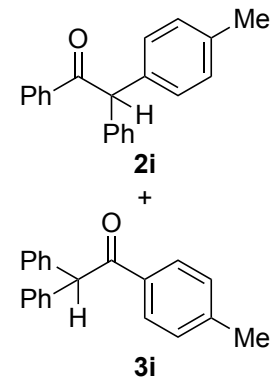

DFILE pro\_diol\_HpMe\_Carbon.als  
 COMNT single pulse decoupled gated NOE  
 DATIM 2021-01-12 15:16:43  
 OBNUC <sup>13</sup>C  
 EXMOD carbon.jxp  
 OBFRQ 99.55 MHz  
 OBSET 5.13 KHz  
 OBFIN 0.98 Hz  
 POINT 26214  
 FREQU 25000.00 Hz  
 SCANS 851  
 ACQTM 1.0486 sec  
 PD 2.0000 sec  
 PW1 3.59 usec  
 IRNUC <sup>1</sup>H  
 CTEMP 20.1 c  
 SLVNT CDCL<sub>3</sub>  
 EXREF 77.00 ppm  
 BF 0.12 Hz  
 RGAIN 50

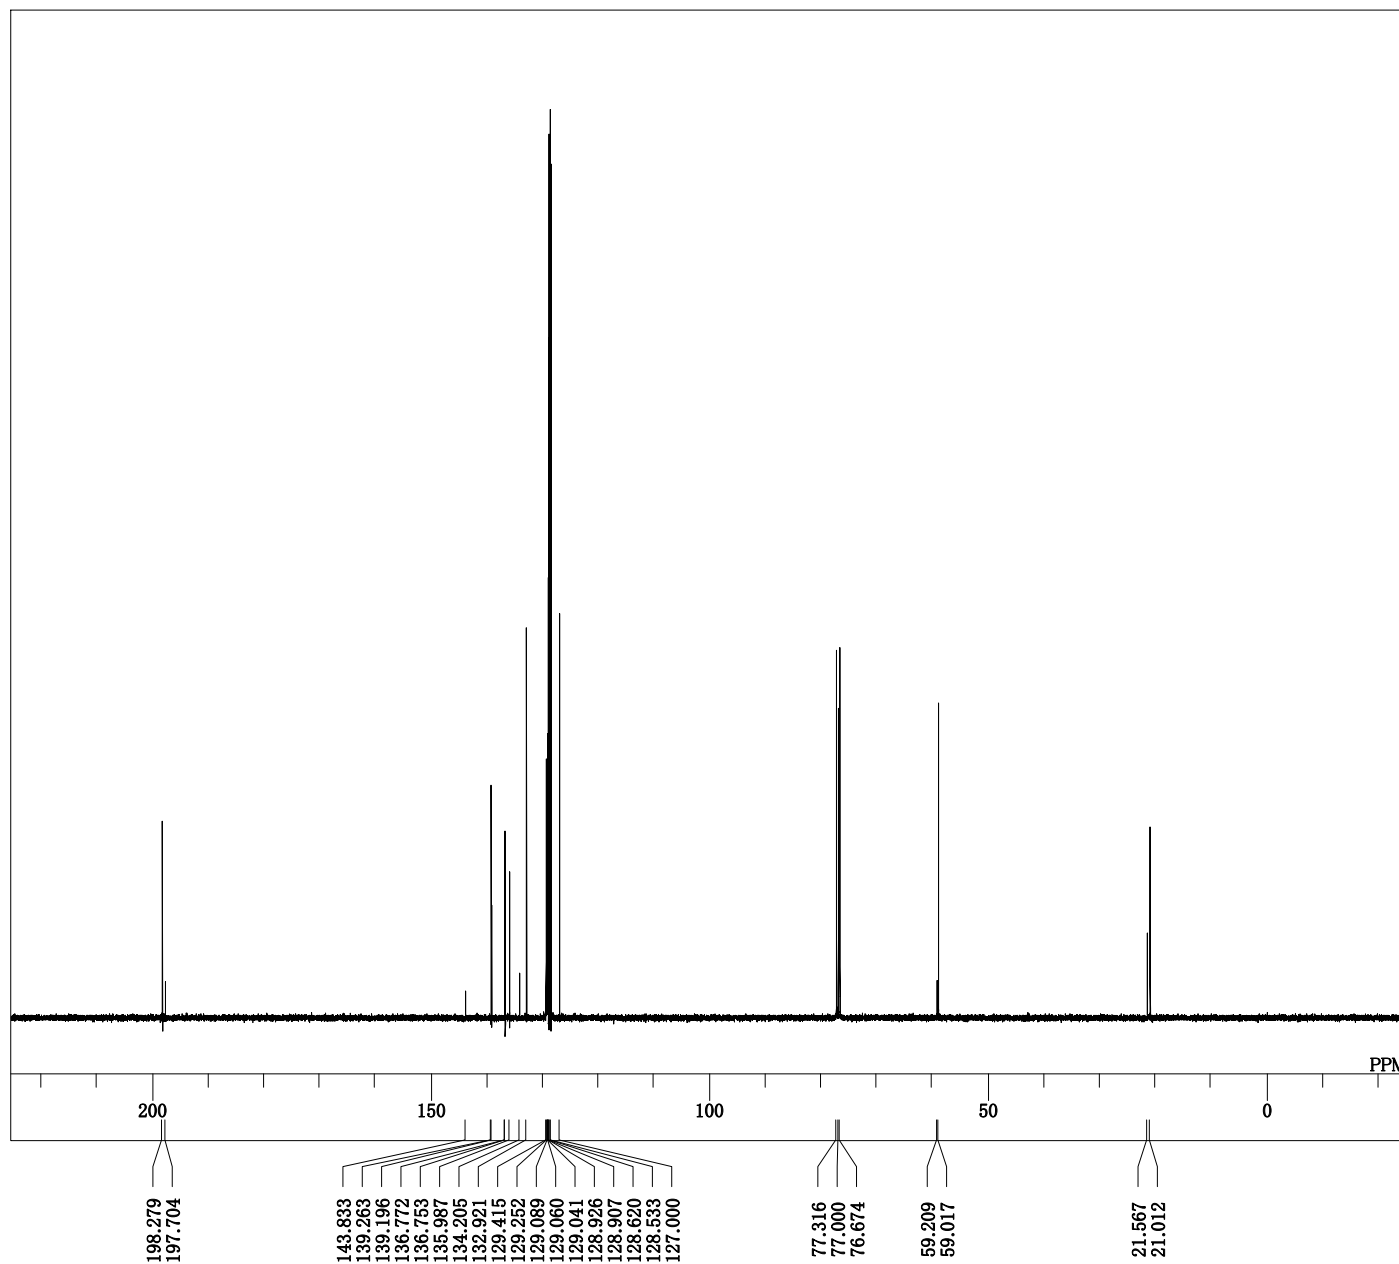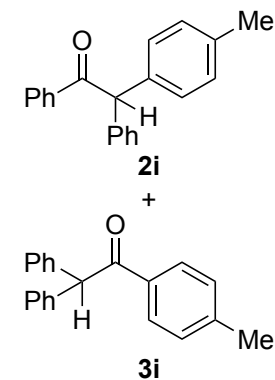

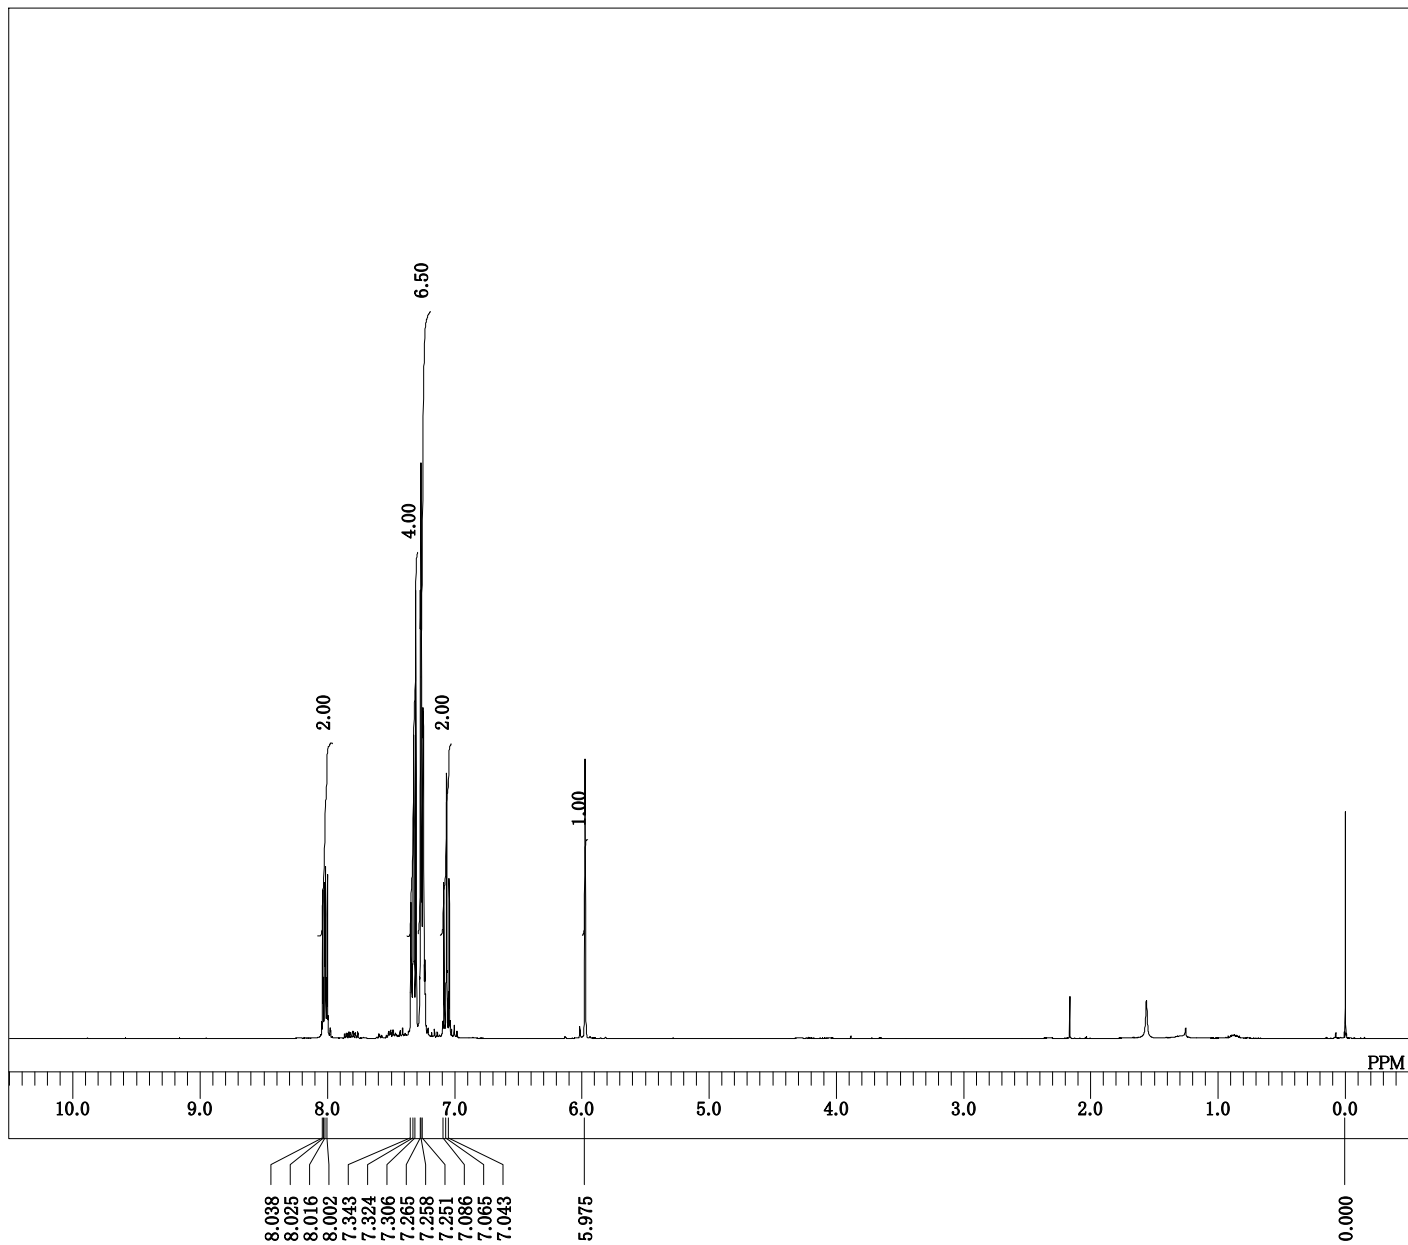

DFILE pro\_diol\_H\_pF.fr1\_Proton.als  
 COMNT single\_pulse  
 DATIM 2020-03-28 10:44:23  
 OBNUC 1H  
 EXMOD proton.jxp  
 OBFRQ 395.88 MHz  
 OBSET 6.28 KHz  
 OBFIN 0.87 Hz  
 POINT 13107  
 FREQU 5938.24 Hz  
 SCANS 8  
 ACQTM 2.2073 sec  
 PD 5.0000 sec  
 PW1 3.14 usec  
 IRNUC 1H  
 CTEMP 20.2 c  
 SLVNT CDCL3  
 EXREF 0.00 ppm  
 BF 0.12 Hz  
 RGAIN 32

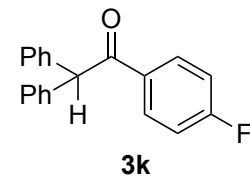

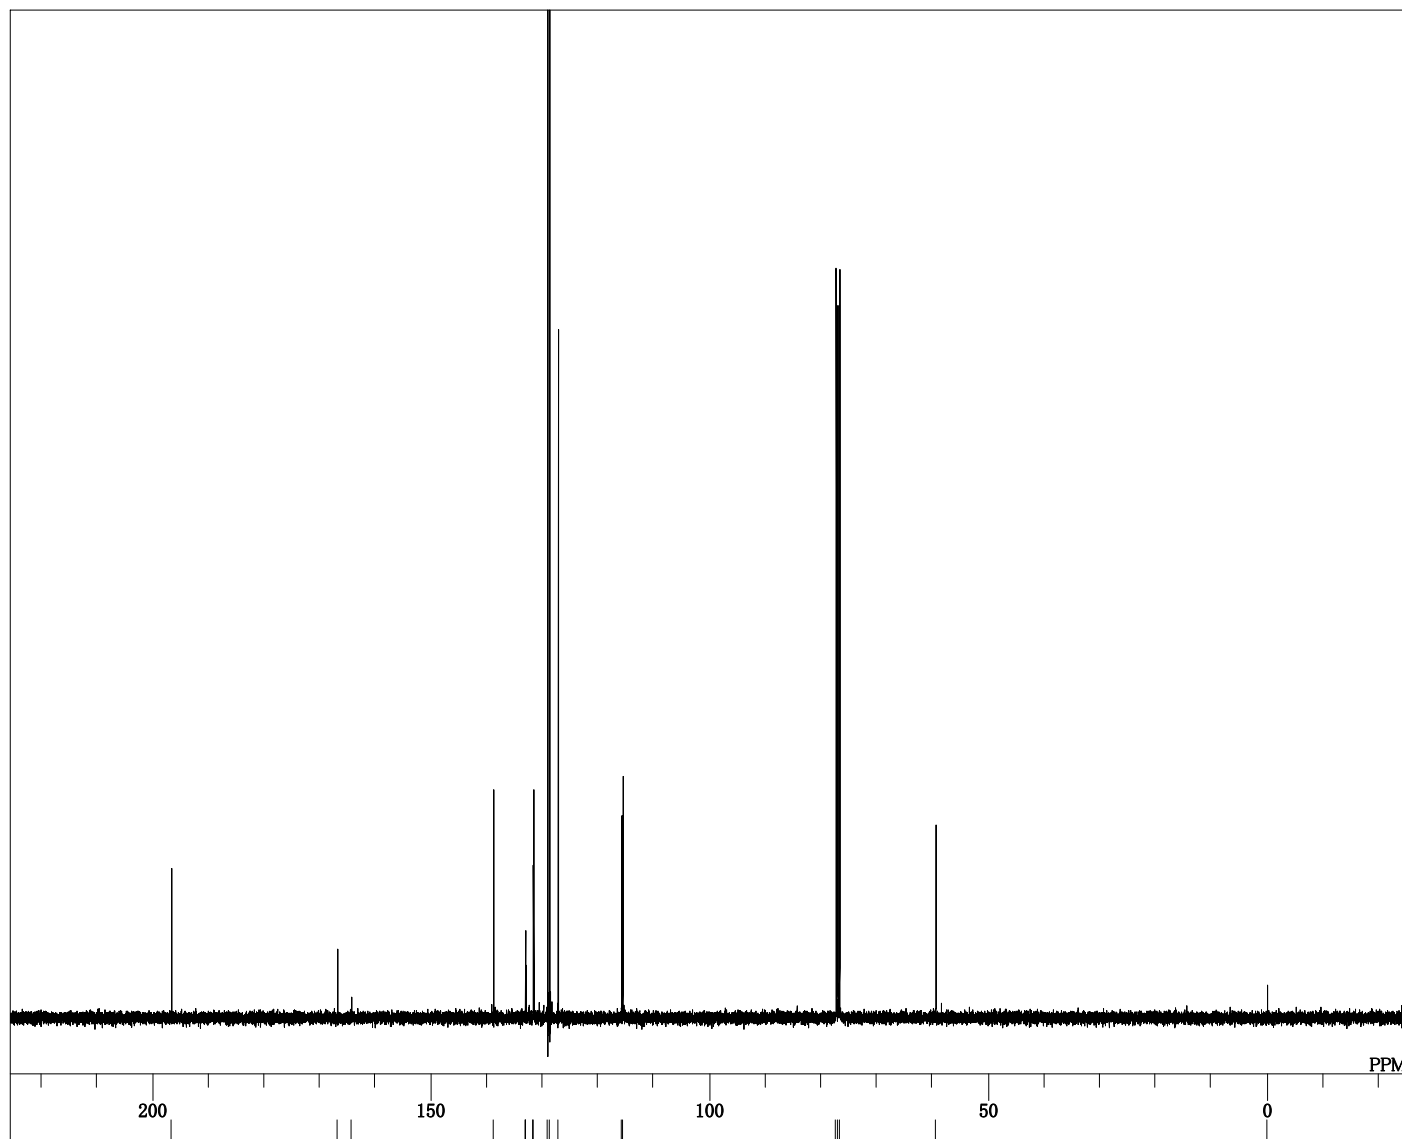

196.610  
 166.863  
 164.305  
 138.840  
 133.111  
 133.082  
 131.683  
 131.597  
 129.087  
 128.781  
 127.248  
 115.847  
 115.627  
 77.343  
 77.017  
 76.701  
 59.466  
 0.000

DFILE pro\_diol\_H\_pF\_fr1\_Carbon.als  
 COMNT single pulse decoupled gated NOE  
 DATIM 2020-03-28 10:45:35  
 OBNUC 13C  
 EXMOD carbon.jxp  
 OBFRQ 99.55 MHz  
 OBSET 5.13 KHz  
 OBFIN 0.98 Hz  
 POINT 26214  
 FREQU 25000.00 Hz  
 SCANS 1024  
 ACQTM 1.0486 sec  
 PD 2.0000 sec  
 PW1 3.59 usec  
 IRNUC 1H  
 CTEMP 20.3 c  
 SLVNT CDCL3  
 EXREF 0.00 ppm  
 BF 0.12 Hz  
 RGAIN 50

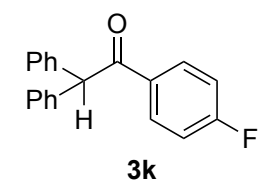

DFILE pro\_diol\_H\_pF\_Fluorine.als  
COMNT single\_pulse  
DATIM 2022-07-04 20:52:34  
OBNUC 19F  
EXMOD single\_pulse.jxp  
OBFRQ 372.50 MHz  
OBSET 3.36 KHz  
OBFIN 6.86 Hz  
POINT 26214  
FREQU 149253.73 Hz  
SCANS 8  
ACQTM 0.1756 sec  
PD 5.0000 sec  
PW1 3.98 usec  
IRNUC 19F  
CTEMP 20.7 c  
SLVNT CDCL3  
EXREF -163.00 ppm  
BF 0.12 Hz  
RGAIN 44

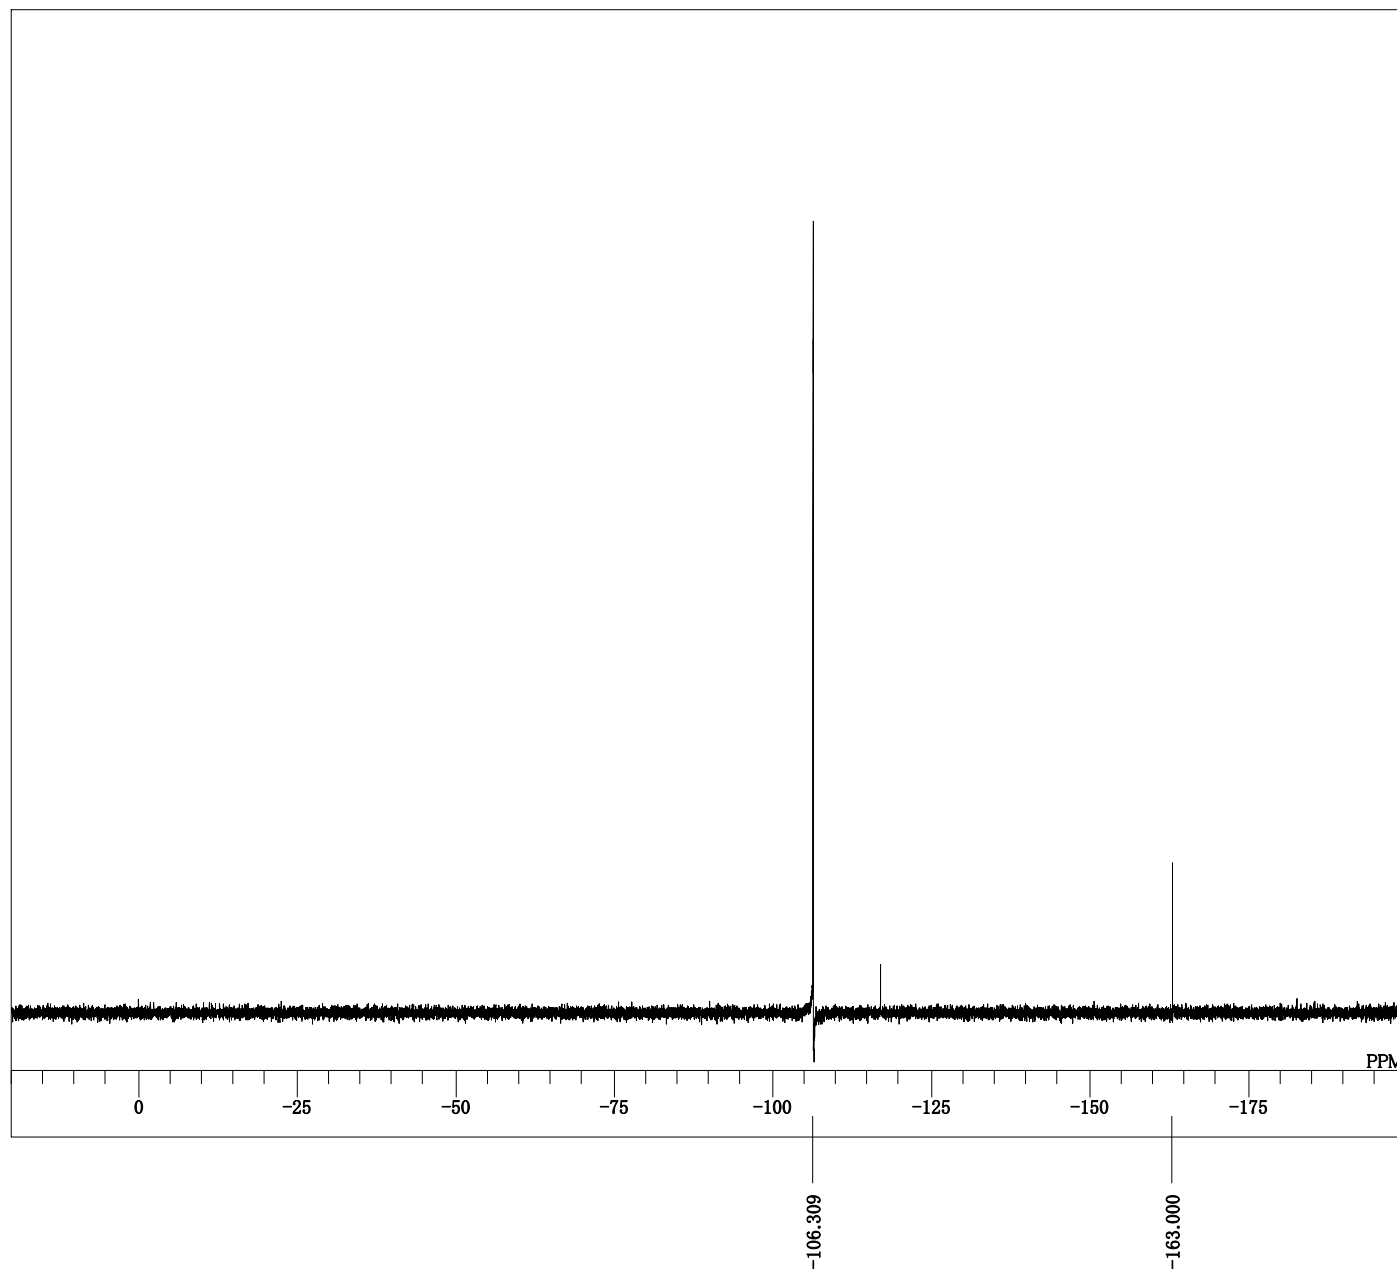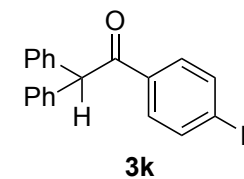

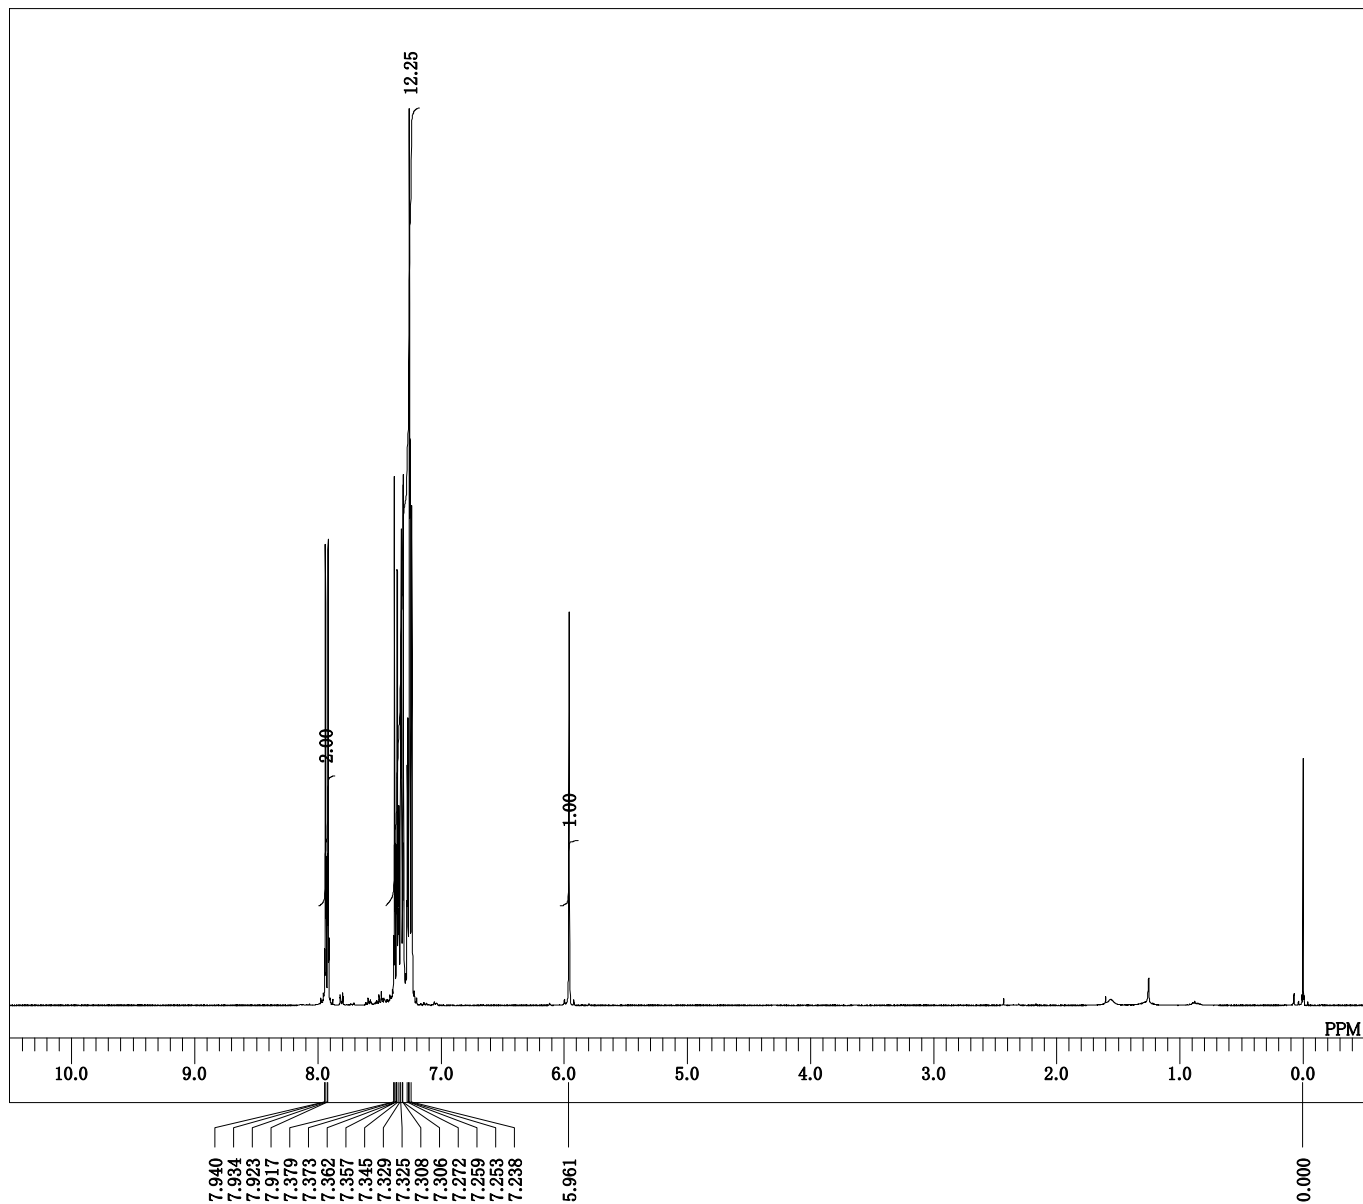

DFILE pro\_dioLH\_pCL2\_Proton.als  
 COMNT single\_pulse  
 DATIM 2020-12-27 15:11:14  
 OBNUC 1H  
 EXMOD proton\_jxp  
 OBFREQ 395.88 MHz  
 OBSET 6.28 KHz  
 OBFIN 0.87 Hz  
 POINT 16384  
 FREQU 7422.80 Hz  
 SCANS 8  
 ACQTM 2.2073 sec  
 PD 5.0000 sec  
 PW1 3.14 usec  
 IRNUC 1H  
 CTEMP 18.8 c  
 SLVNT CDCL3  
 EXREF 0.00 ppm  
 BF 0.12 Hz  
 RGAIN 34

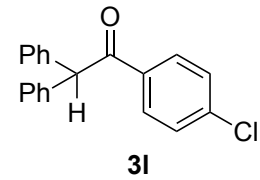

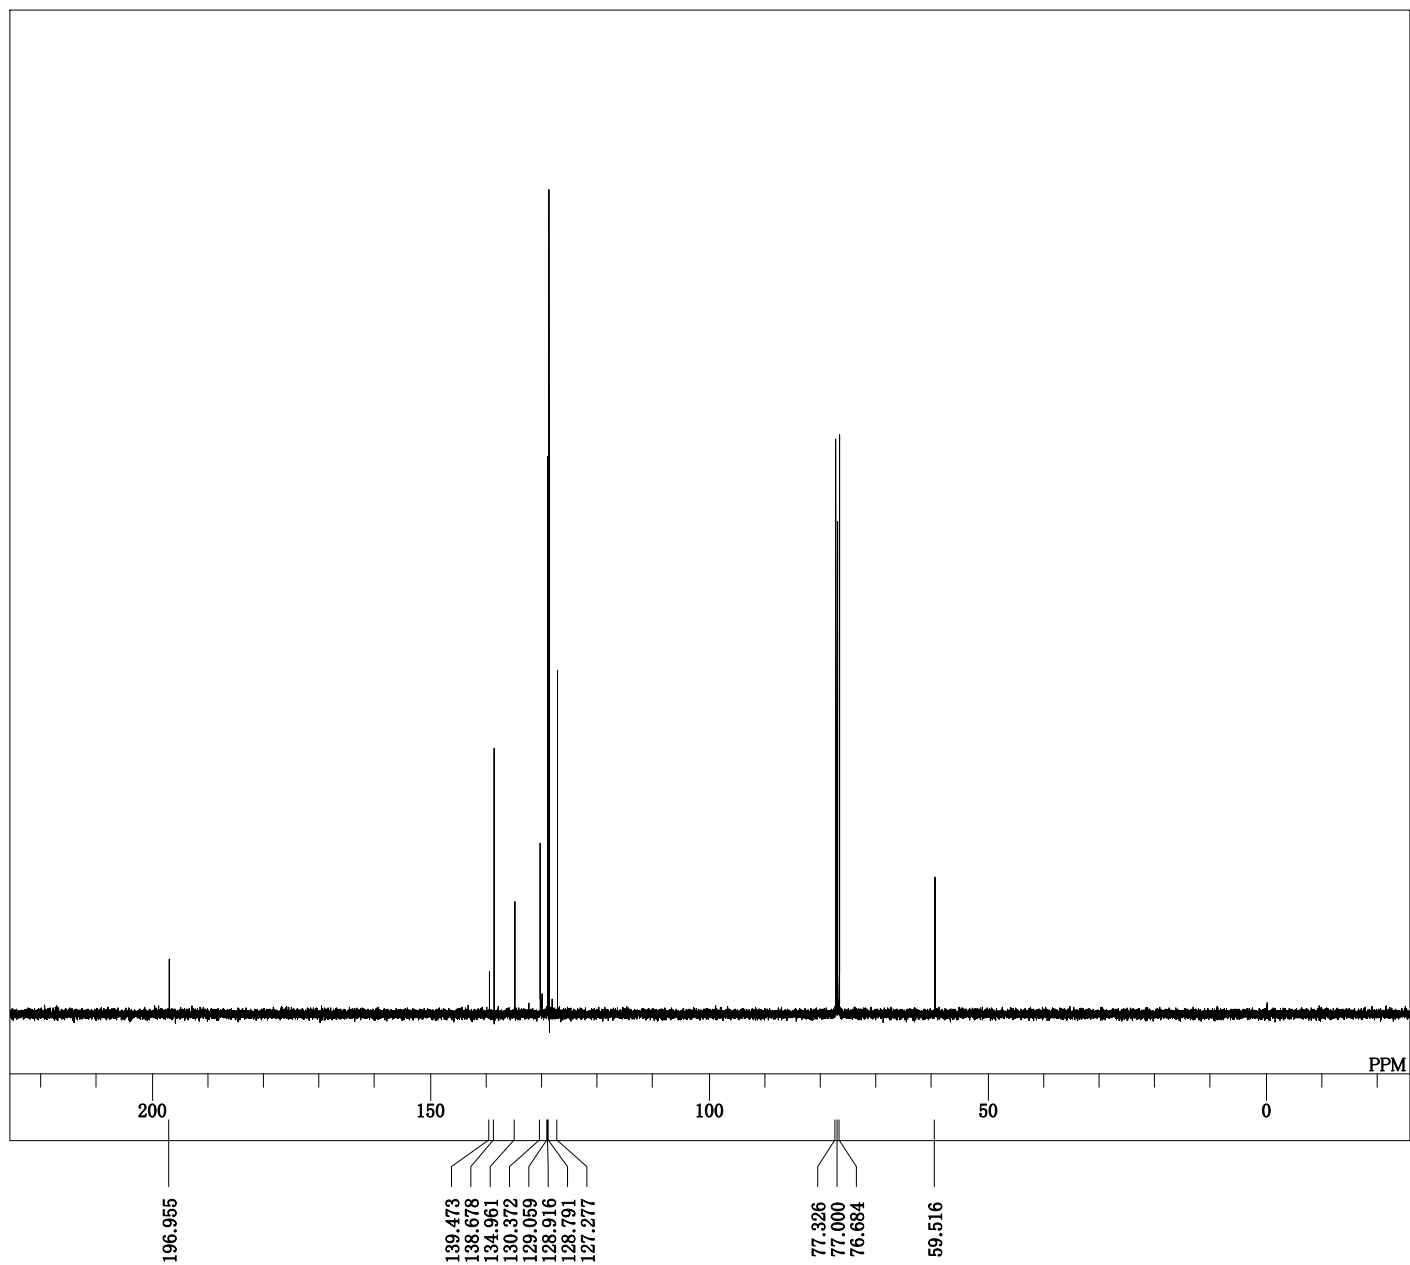

DFILE pro\_dioLH\_pClEx914\_fr1\_Carbon.al  
 COMNT single pulse decoupled gated NOE  
 DATIM 2020-12-27 15:12:27  
 OBNUC 13C  
 EXMOD carbon.jxp  
 OBFREQ 99.55 MHz  
 OBSET 5.13 KHz  
 OBFIN 0.98 Hz  
 POINT 32767  
 FREQU 31250.00 Hz  
 SCANS 720  
 ACQTM 1.0486 sec  
 PD 2.0000 sec  
 PW1 3.59 usec  
 IRNUC 1H  
 CTEMP 19.4 c  
 SLVNT CDCL3  
 EXREF 77.00 ppm  
 BF 0.12 Hz  
 RGAIN 50

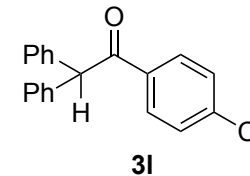

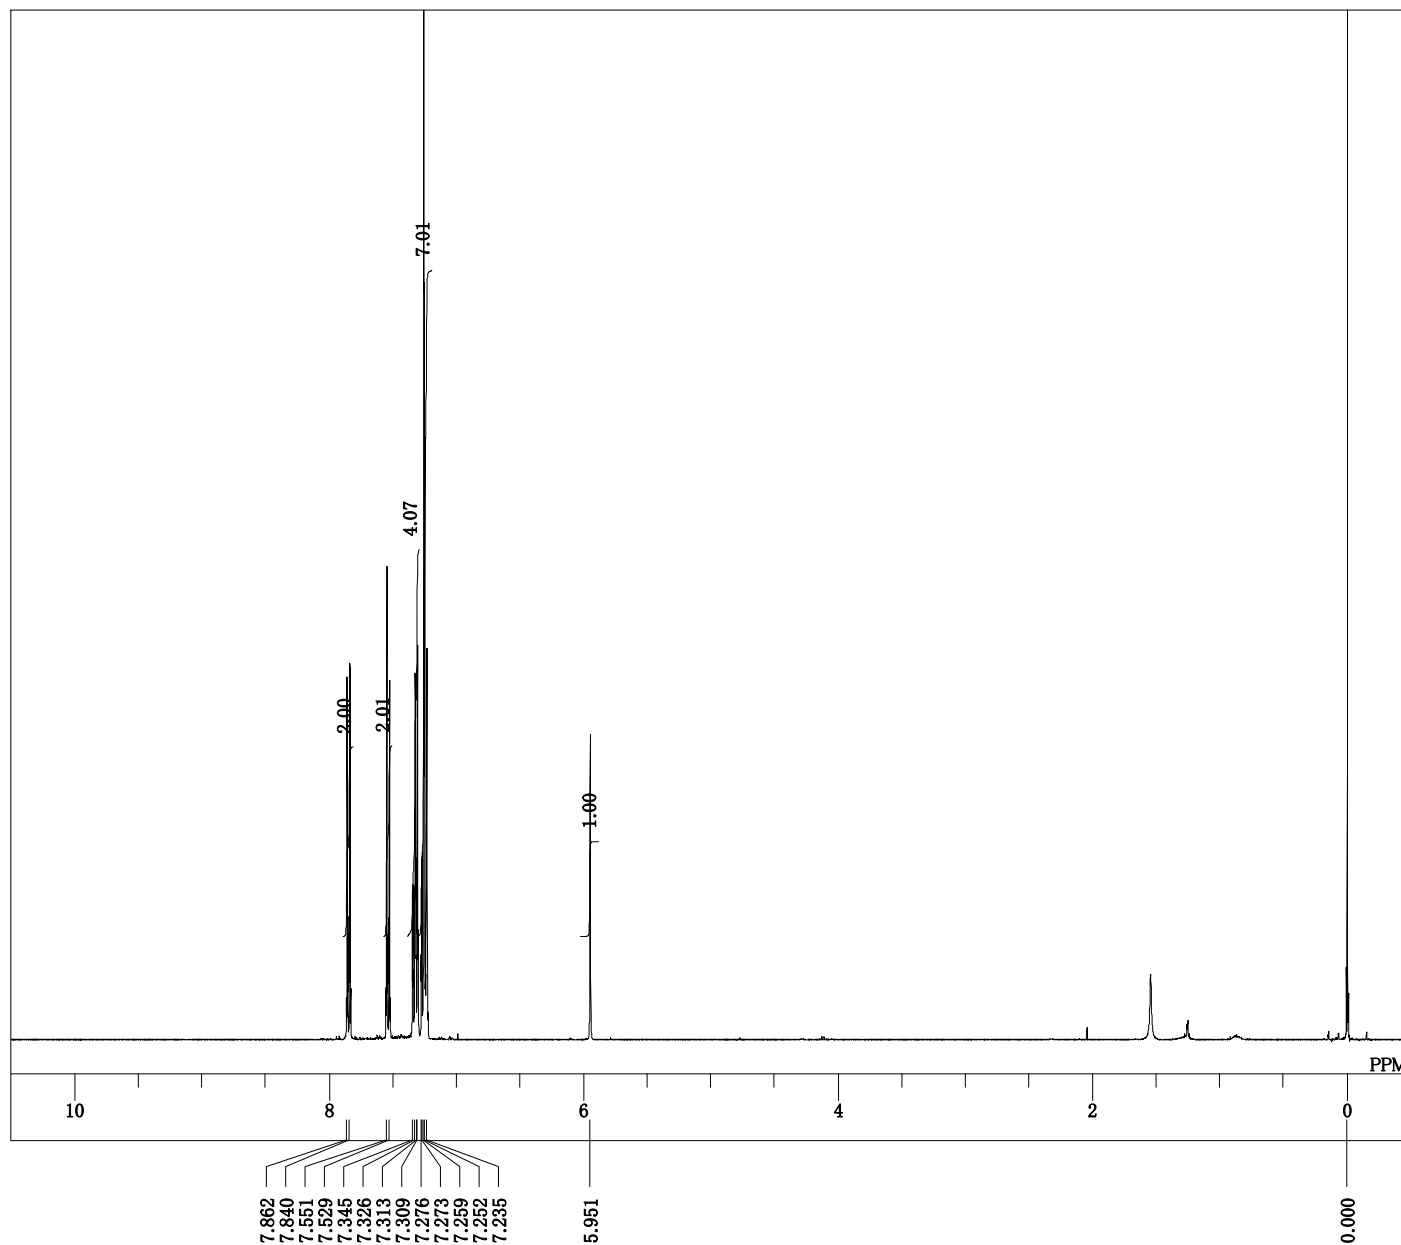

DFILE pro\_diolH\_pBr\_Proton.als  
 COMNT single\_pulse  
 DATIM 2022-04-09 20:16:25  
 OBNUC 1H  
 EXMOD proton.jxp  
 OBFRQ 395.88 MHz  
 OBSET 6.28 KHz  
 OBFIN 0.87 Hz  
 POINT 16384  
 FREQU 7422.80 Hz  
 SCANS 8  
 ACQTM 2.2073 sec  
 PD 5.0000 sec  
 PW1 3.25 usec  
 IRNUC 1H  
 CTEMP 20.5 c  
 SLVNT CDCL3  
 EXREF 0.00 ppm  
 BF 0.12 Hz  
 RGAIN 46

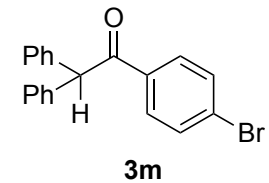



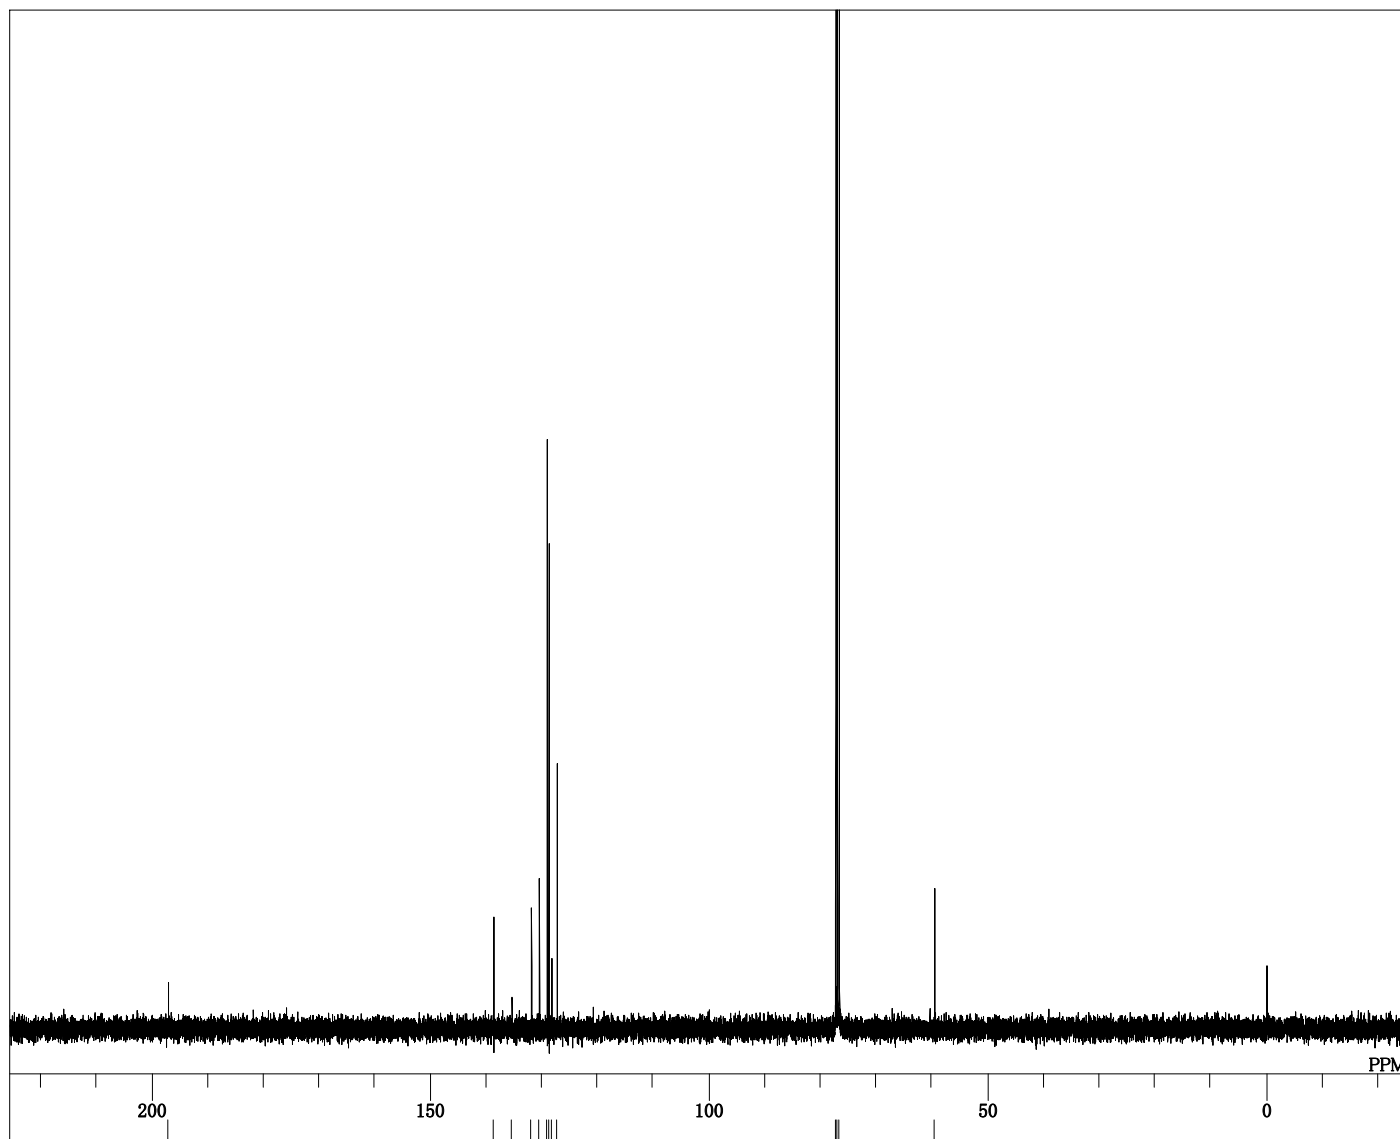

DFILE pro\_diol\_H\_pBr\_Carbon.als  
 COMNT single pulse decoupled gated NOE  
 DATIM 2022-04-09 20:19:13  
 OBNUC 13C  
 EXMOD carbon.jxp  
 OBFRQ 99.55 MHz  
 OBSET 5.13 KHz  
 OBFIN 0.98 Hz  
 POINT 32767  
 FREQU 31250.00 Hz  
 SCANS 1024  
 ACQTM 1.0486 sec  
 PD 2.0000 sec  
 PW1 3.67 usec  
 IRNUC 1H  
 CTEMP 20.5 c  
 SLVNT CDCL3  
 EXREF 77.00 ppm  
 BF 0.12 Hz  
 RGAIN 50

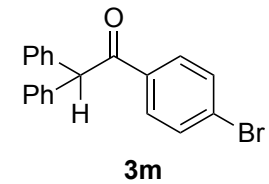

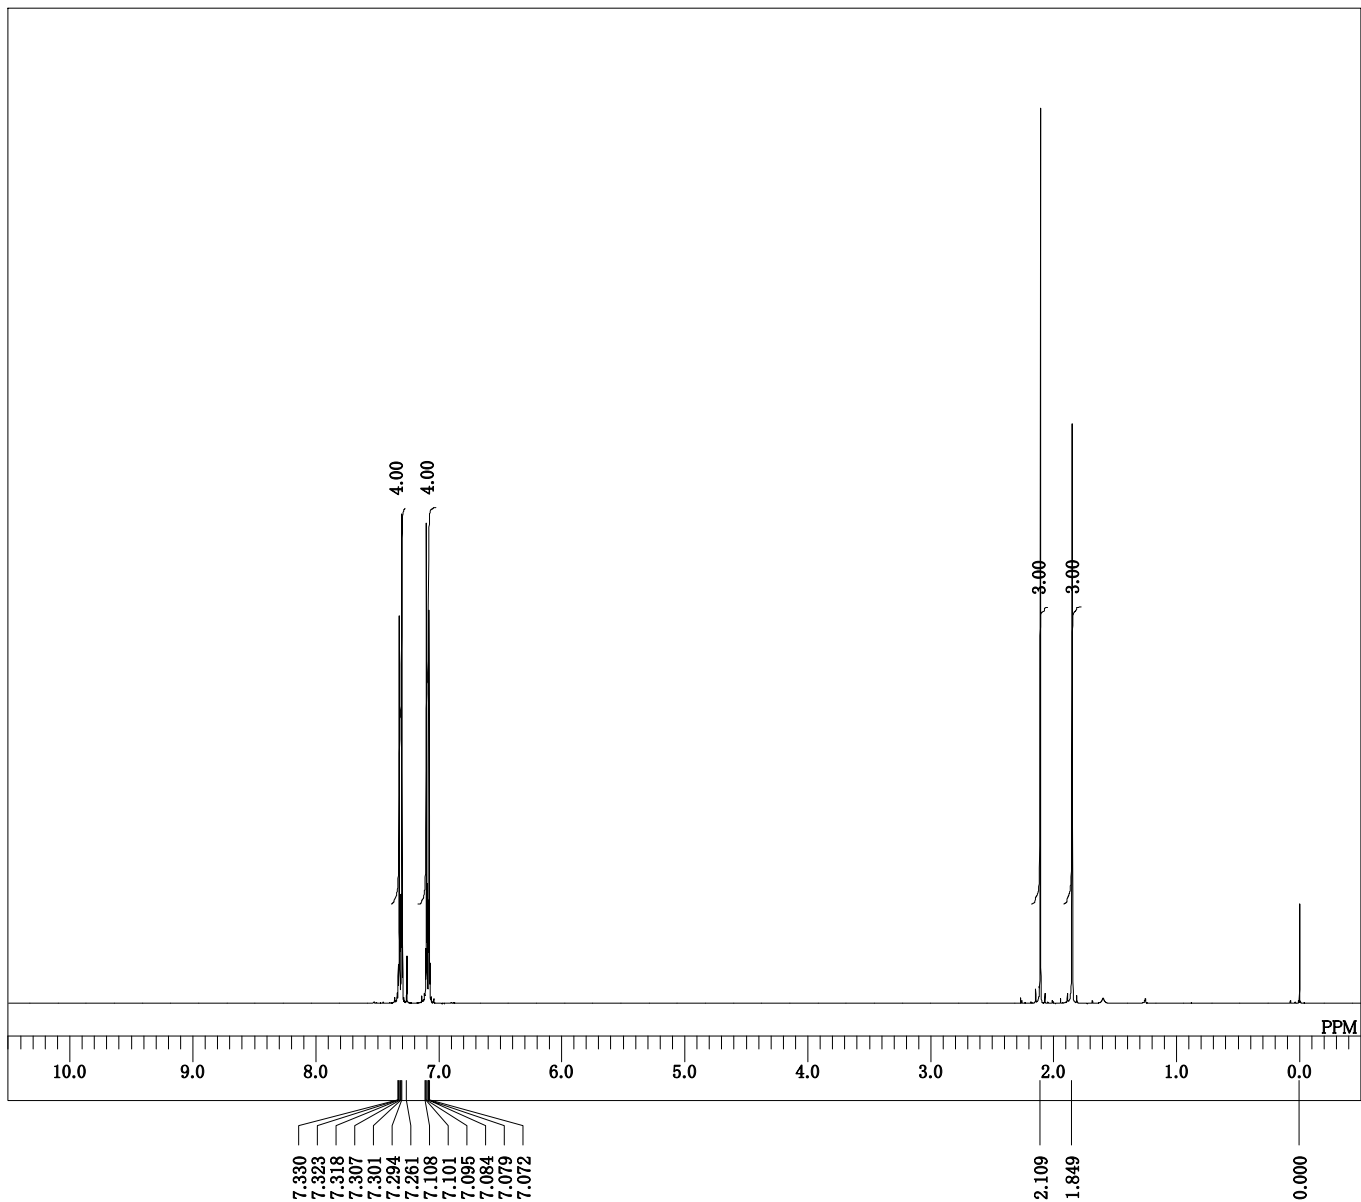

DFILE pro\_dioLpClpClMeMe-Proton-1-1.als  
 COMNT single\_pulse  
 DATIM 2020-11-24 23:27:51  
 OBNUC 1H  
 EXMOD proton.jpg  
 OBFRQ 395.88 MHz  
 OBSET 6.28 KHz  
 OBFIN 0.87 Hz  
 POINT 16384  
 FREQU 7422.80 Hz  
 SCANS 8  
 ACQTM 2.2073 sec  
 PD 5.0000 sec  
 PW1 3.14 usec  
 IRNUC 1H  
 CTEMP 19.2 c  
 SLVNT CDCL3  
 EXREF 0.00 ppm  
 BF 0.12 Hz  
 RGAIN 30

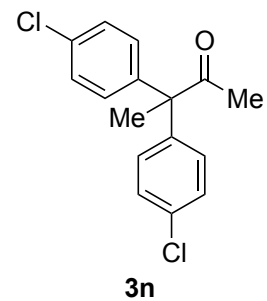

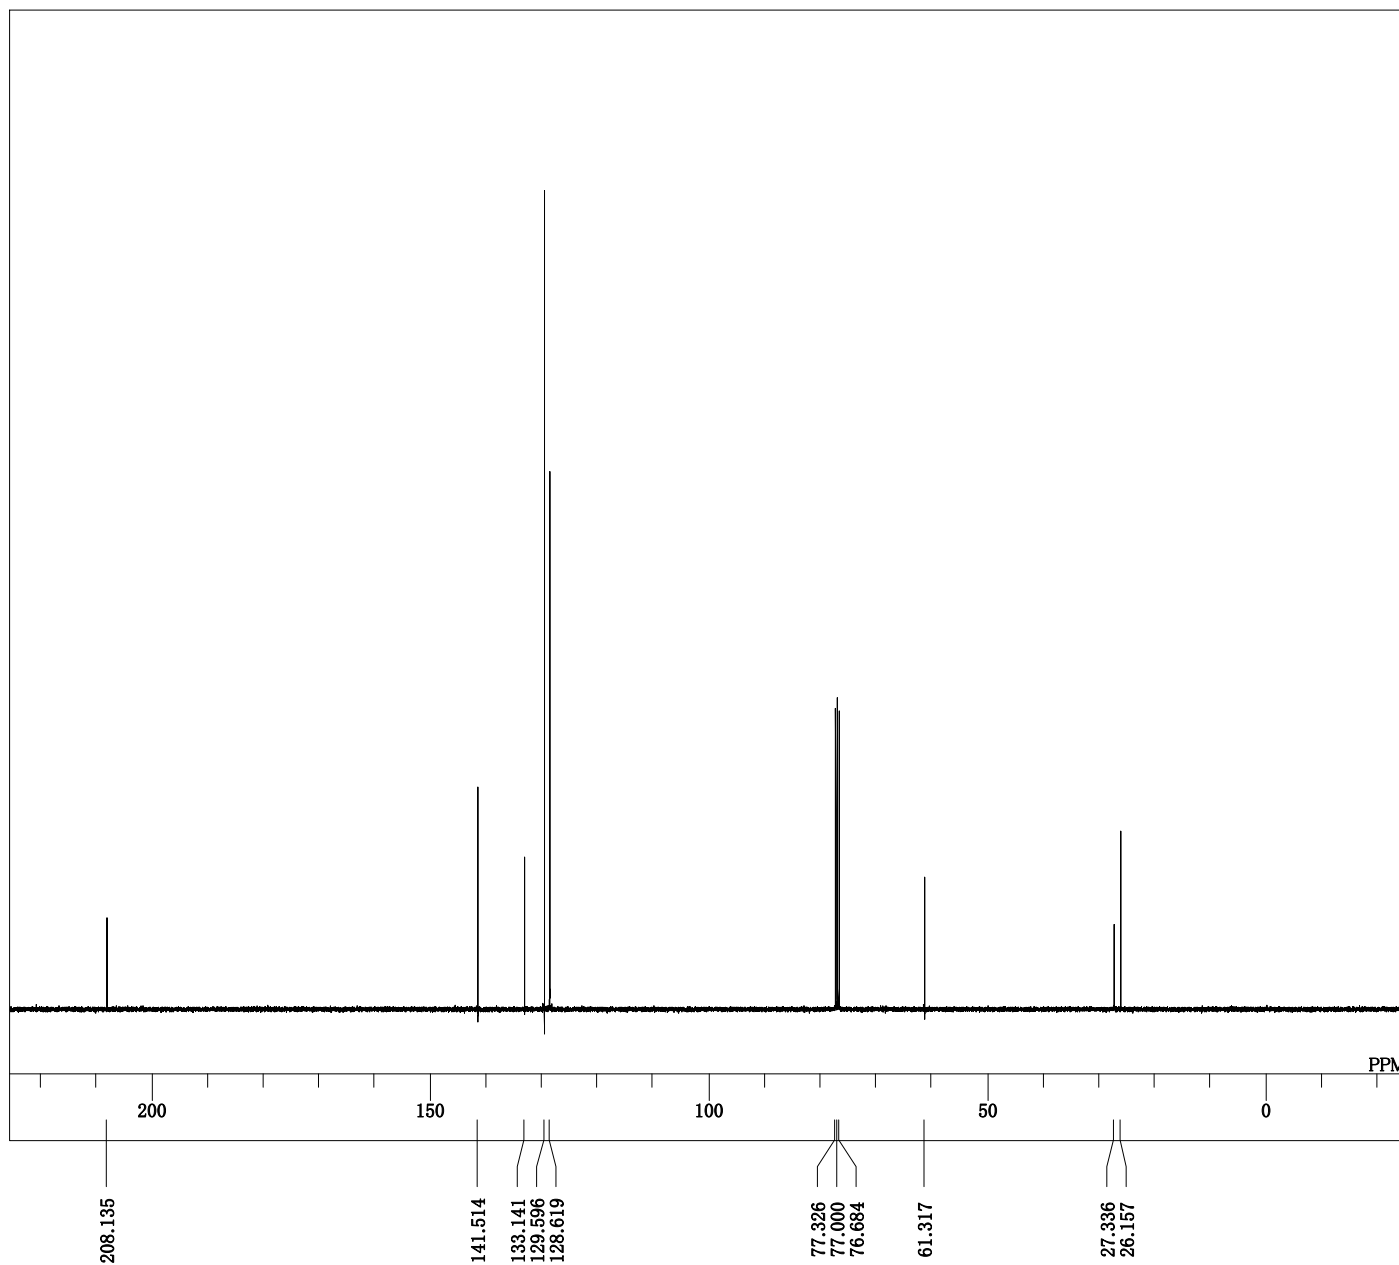

DFILE pro\_diol\_pClpClMeMe\_Carbon-1-1  
 COMNT single pulse decoupled gated NOE  
 DATIM 2020-11-24 23:29:04  
 OBNUC <sup>13</sup>C  
 EXMOD carbon.jxp  
 OBFRQ 99.55 MHz  
 OBSET 5.13 KHz  
 OBFIN 0.98 Hz  
 POINT 32767  
 FREQU 31250.00 Hz  
 SCANS 1144  
 ACQTM 1.0486 sec  
 PD 2.0000 sec  
 PW1 3.59 usec  
 IRNUC <sup>1</sup>H  
 CTEMP 18.8 c  
 SLVNT CDCL3  
 EXREF 77.00 ppm  
 BF 0.12 Hz  
 RGAIN 50

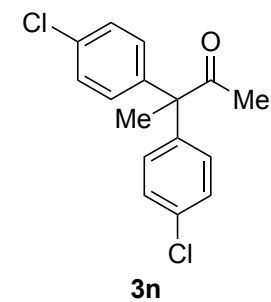

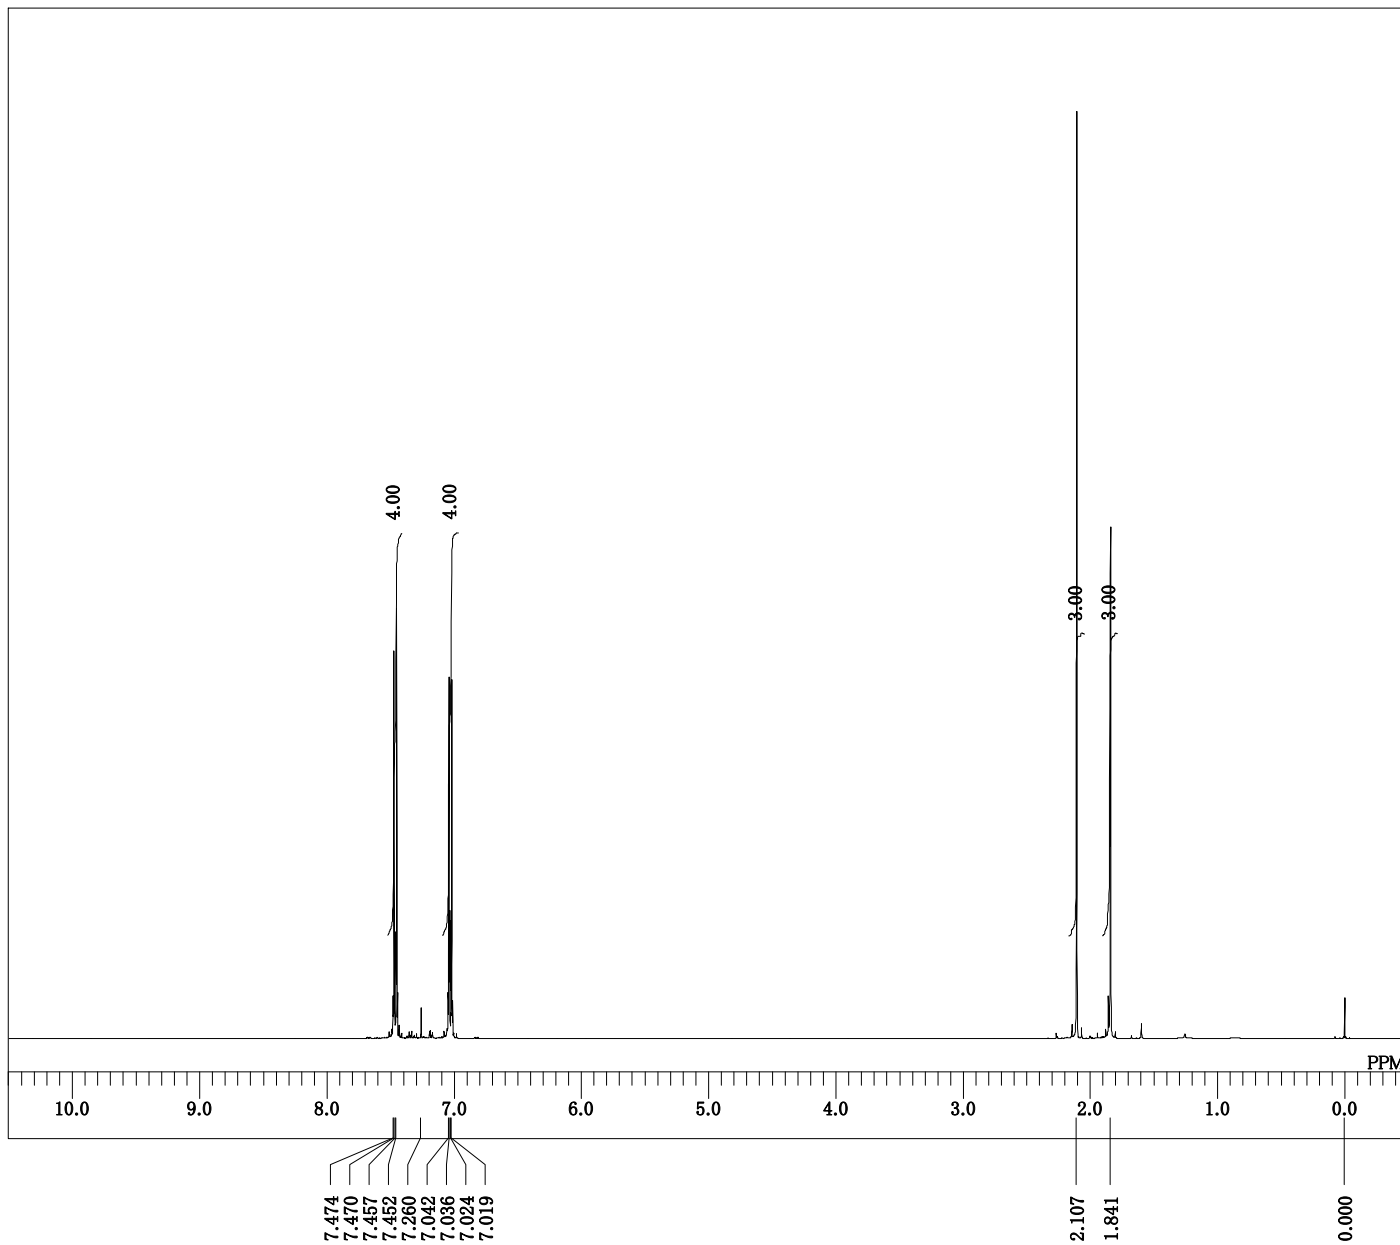

DFILE pro\_diol\_pBrpBr\_MeMe\_Proton.als  
 COMNT single\_pulse  
 DATIM 2020-12-04 17:43:44  
 OBNUC 1H  
 EXMOD proton.jxp  
 OBFRQ 395.88 MHz  
 OBSET 6.28 KHz  
 OBFIN 0.87 Hz  
 POINT 16384  
 FREQU 7422.80 Hz  
 SCANS 8  
 ACQTM 2.2073 sec  
 PD 5.0000 sec  
 PW1 3.14 usec  
 IRNUC 1H  
 CTEMP 18.9 c  
 SLVNT CDCL3  
 EXREF 0.00 ppm  
 BF 0.12 Hz  
 RGAIN 28

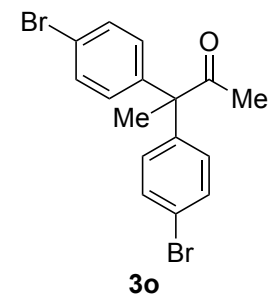

DFILE pro\_diol\_pBrpBr\_MeMe\_Carbon.als  
 COMNT single pulse decoupled gated NOE  
 DATIM 2020-12-04 17:45:59  
 OBNUC 13C  
 EXMOD carbon.jxp  
 OBFRQ 99.55 MHz  
 OBSET 5.13 KHz  
 OBFIN 0.98 Hz  
 POINT 32767  
 FREQU 31250.00 Hz  
 SCANS 299  
 ACQTM 1.0486 sec  
 PD 2.0000 sec  
 PW1 3.59 usec  
 IRNUC 1H  
 CTEMP 18.9 c  
 SLVNT CDCL3  
 EXREF 77.00 ppm  
 BF 0.12 Hz  
 RGAIN 50

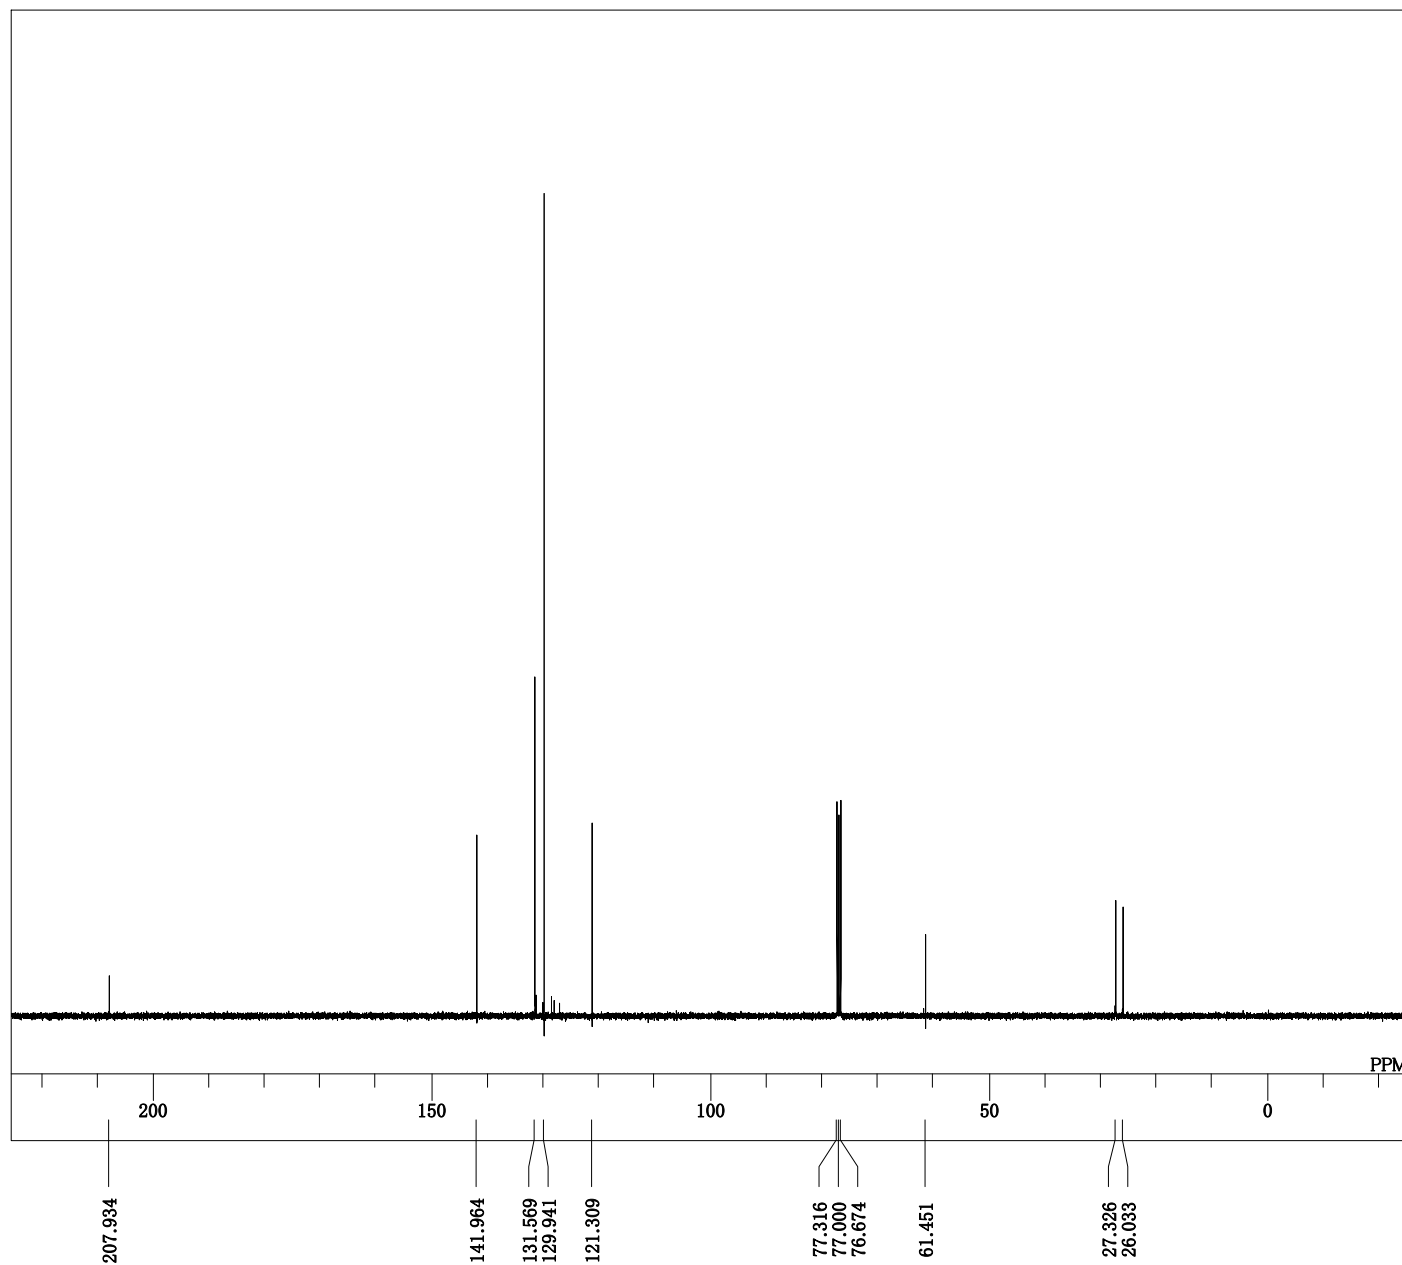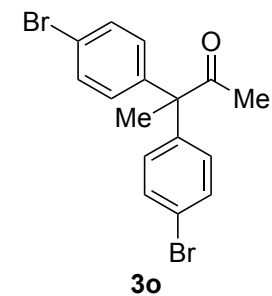

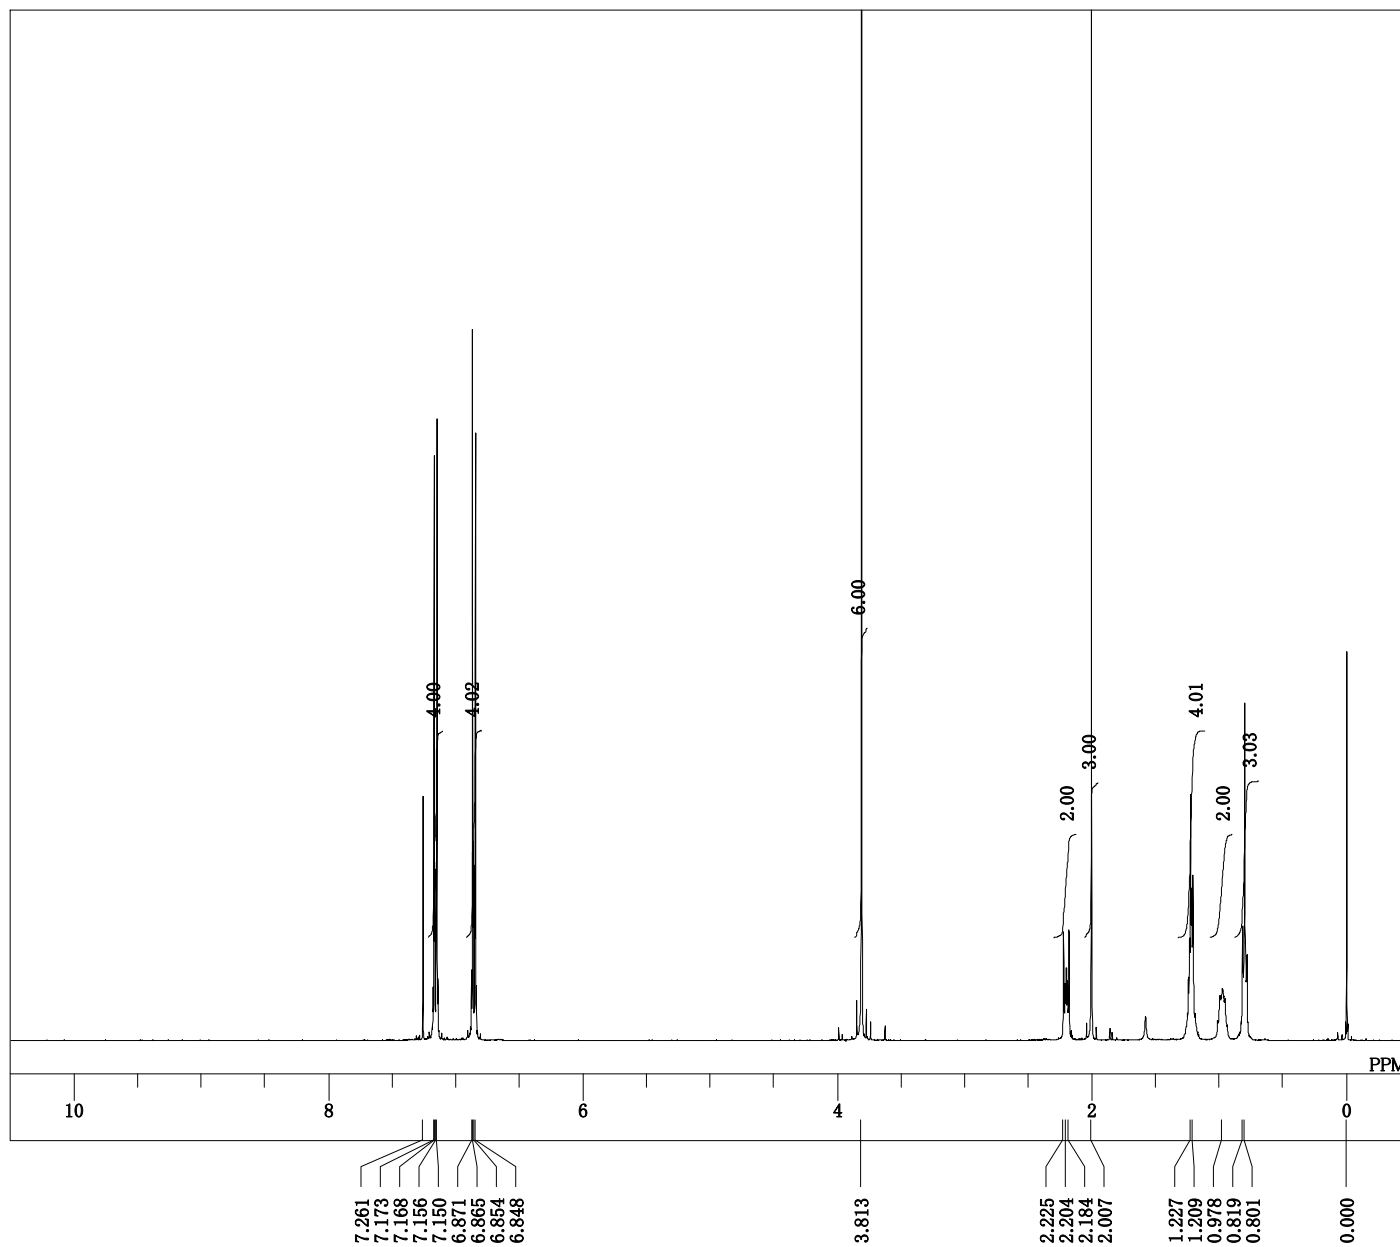

DFILE pro\_diol\_PMPPMP\_MenPenty\_lfr4\_Pt  
 COMNT single\_pulse  
 DATIM 2020-10-18 04:52:22  
 OBNUC 1H  
 EXMOD proton.jxp  
 OBFRQ 395.88 MHz  
 OBSET 6.28 KHz  
 OBFIN 0.87 Hz  
 POINT 13107  
 FREQU 5938.24 Hz  
 SCANS 8  
 ACQTM 2.2073 sec  
 PD 5.0000 sec  
 PW1 3.14 usec  
 IRNUC 1H  
 CTEMP 19.7 c  
 SLVNT CDCL3  
 EXREF 0.00 ppm  
 BF 0.12 Hz  
 RGAIN 34

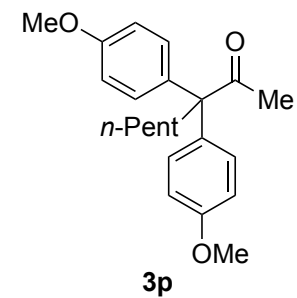

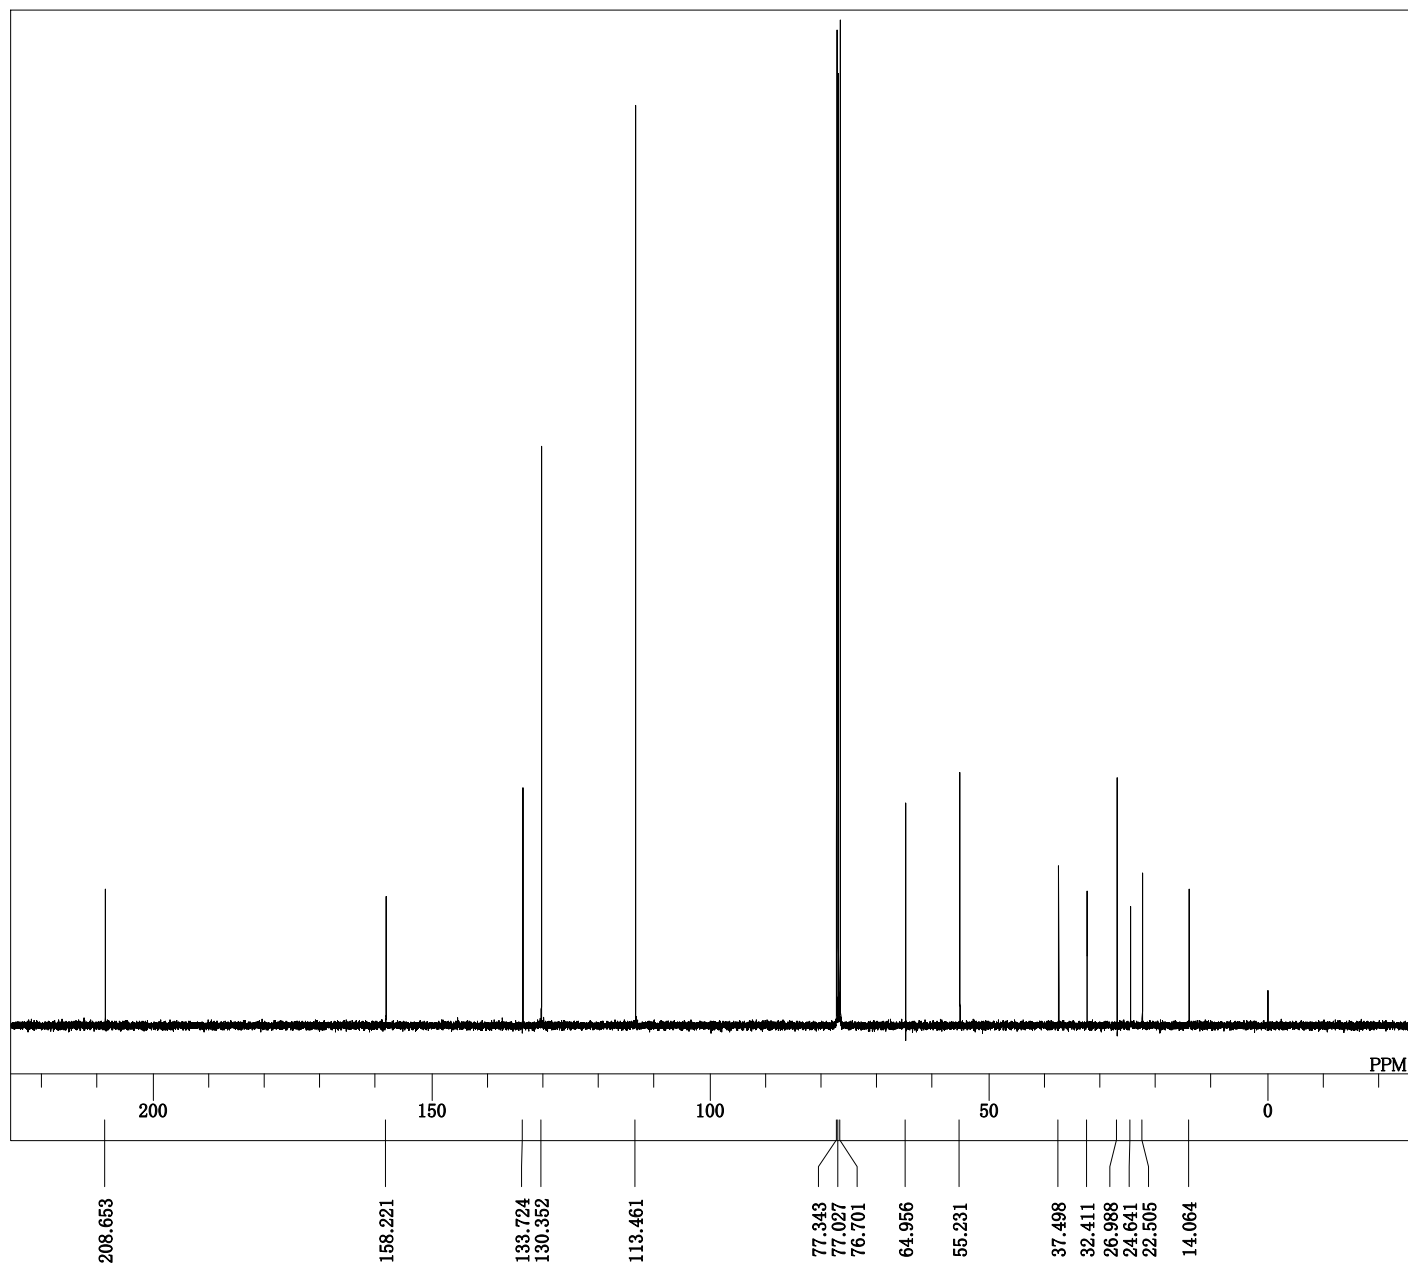

DFILE pro\_diol\_PMPPMP\_MenPentyLfr4\_C  
 COMNT single pulse decoupled gated NOE  
 DATIM 2020-10-18 04:53:35  
 OBNUC 13C  
 EXMOD carbon.jxp  
 OBFRQ 99.55 MHz  
 OBSET 5.13 KHz  
 OBFIN 0.98 Hz  
 POINT 26214  
 FREQU 25000.00 Hz  
 SCANS 3409  
 ACQTM 1.0486 sec  
 PD 2.0000 sec  
 PW1 3.59 usec  
 IRNUC 1H  
 CTEMP 19.5 c  
 SLVNT CDCL3  
 EXREF 0.00 ppm  
 BF 0.12 Hz  
 RGAIN 50

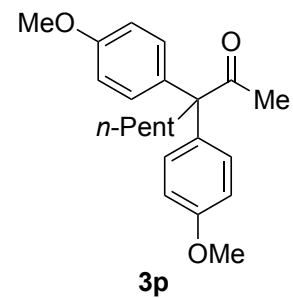





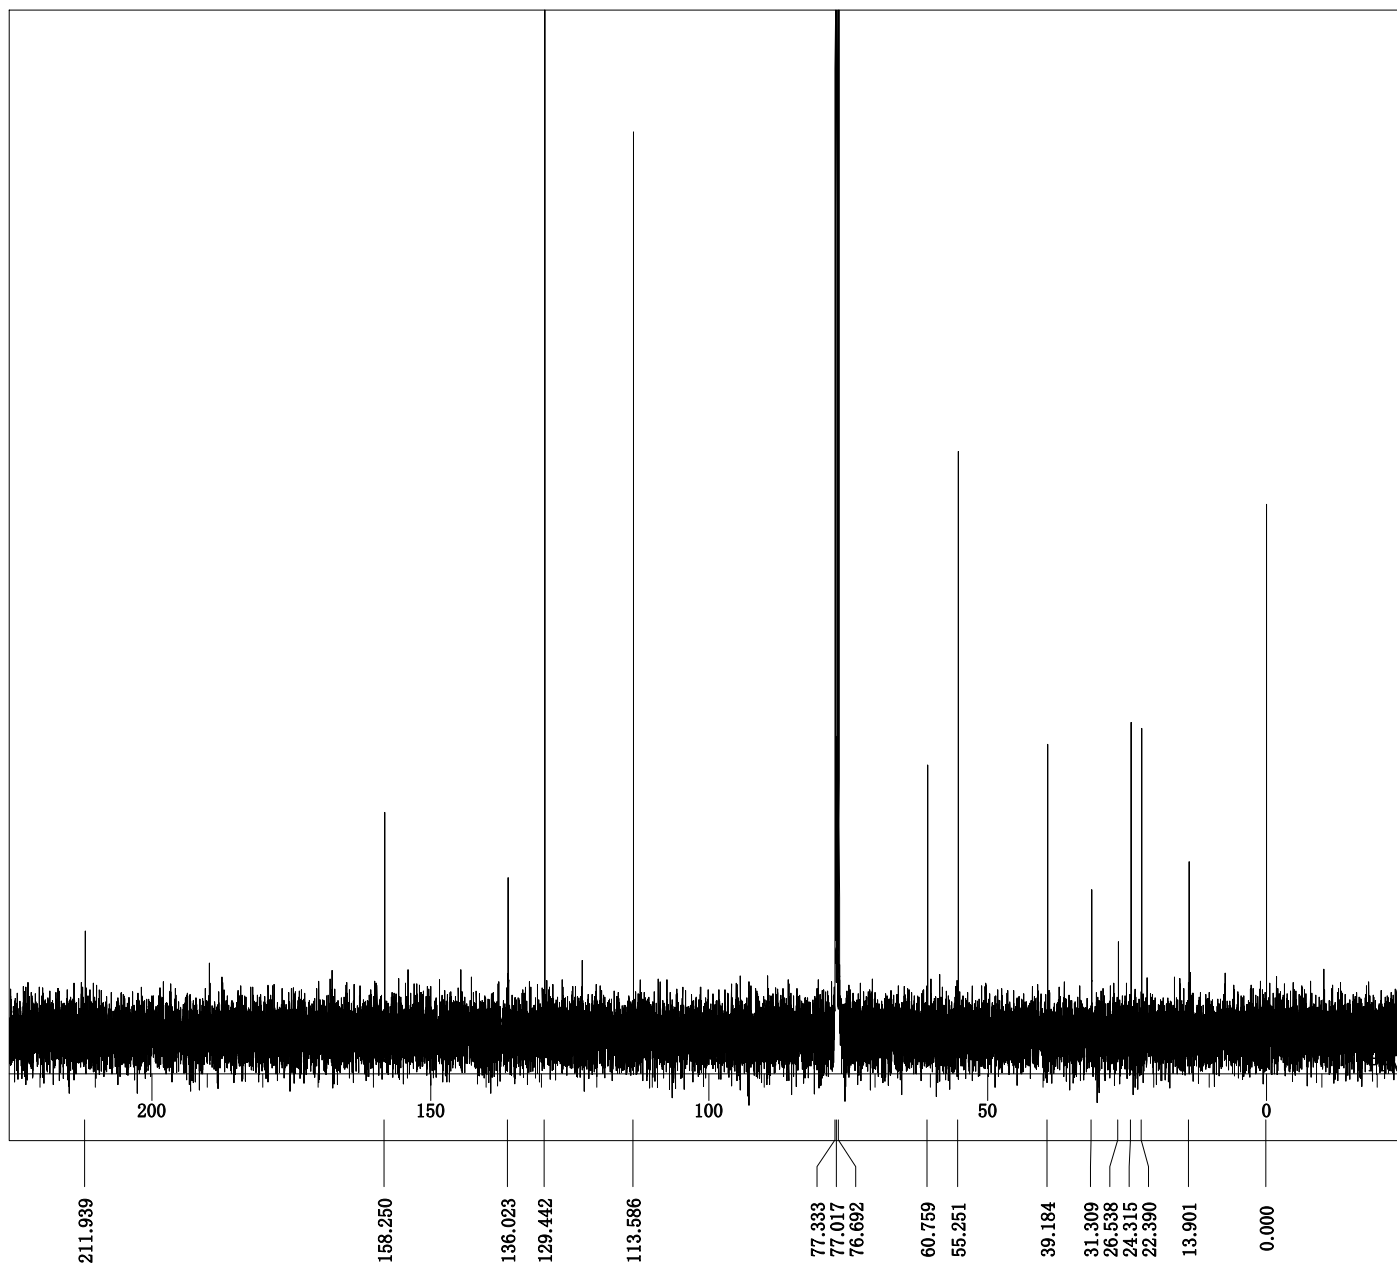

DFILE pro\_diol\_PMPPMP\_MenPentyl\_fr3\_C  
 COMNT single pulse decoupled gated NOE  
 DATIM 2020-10-18 01:17:35  
 OBNUC 13C  
 EXMOD carbon.jxp  
 OBFRQ 99.55 MHz  
 OBSET 5.13 KHz  
 OBFIN 0.98 Hz  
 POINT 26214  
 FREQU 25000.00 Hz  
 SCANS 4096  
 ACQTM 1.0486 sec  
 PD 2.0000 sec  
 PW1 3.59 usec  
 IRNUC 1H  
 CTEMP 20.1 c  
 SLVNT CDCL3  
 EXREF 0.00 ppm  
 BF 0.12 Hz  
 RGAIN 50

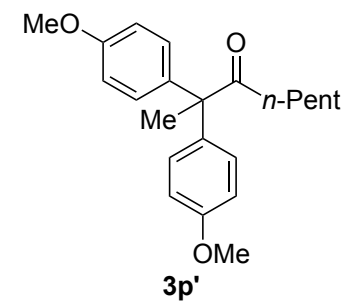

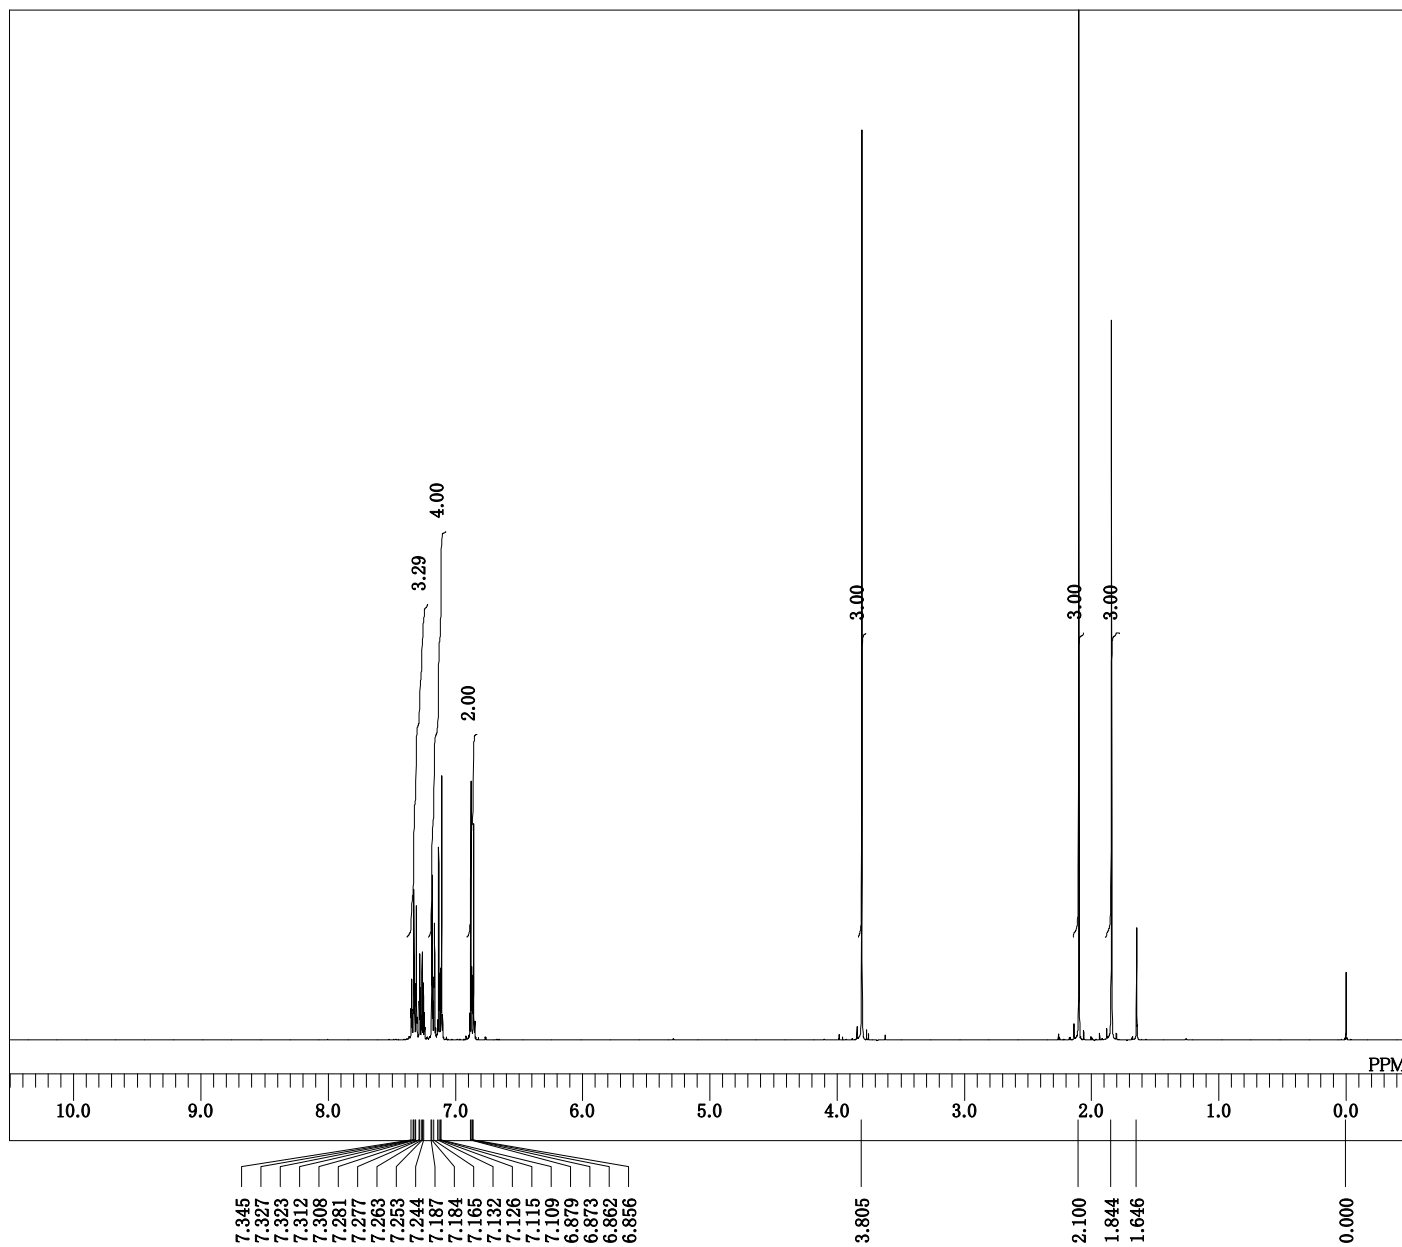

DFILE pro\_diol\_PhPMP.MeMe\_Proton.als  
 COMNT single\_pulse  
 DATIM 2020-09-12 09:54:12  
 OBNUC 1H  
 EXMOD proton.jxp  
 OBFRQ 395.88 MHz  
 OBSET 6.28 KHz  
 OBFIN 0.87 Hz  
 POINT 13107  
 FREQU 5938.24 Hz  
 SCANS 8  
 ACQTM 2.2073 sec  
 PD 5.0000 sec  
 PW1 3.14 usec  
 IRNUC 1H  
 CTEMP 20.9 c  
 SLVNT CDCL3  
 EXREF 0.00 ppm  
 BF 0.12 Hz  
 RGAIN 26

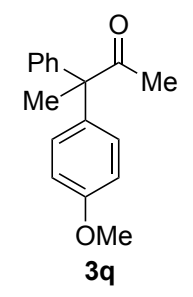

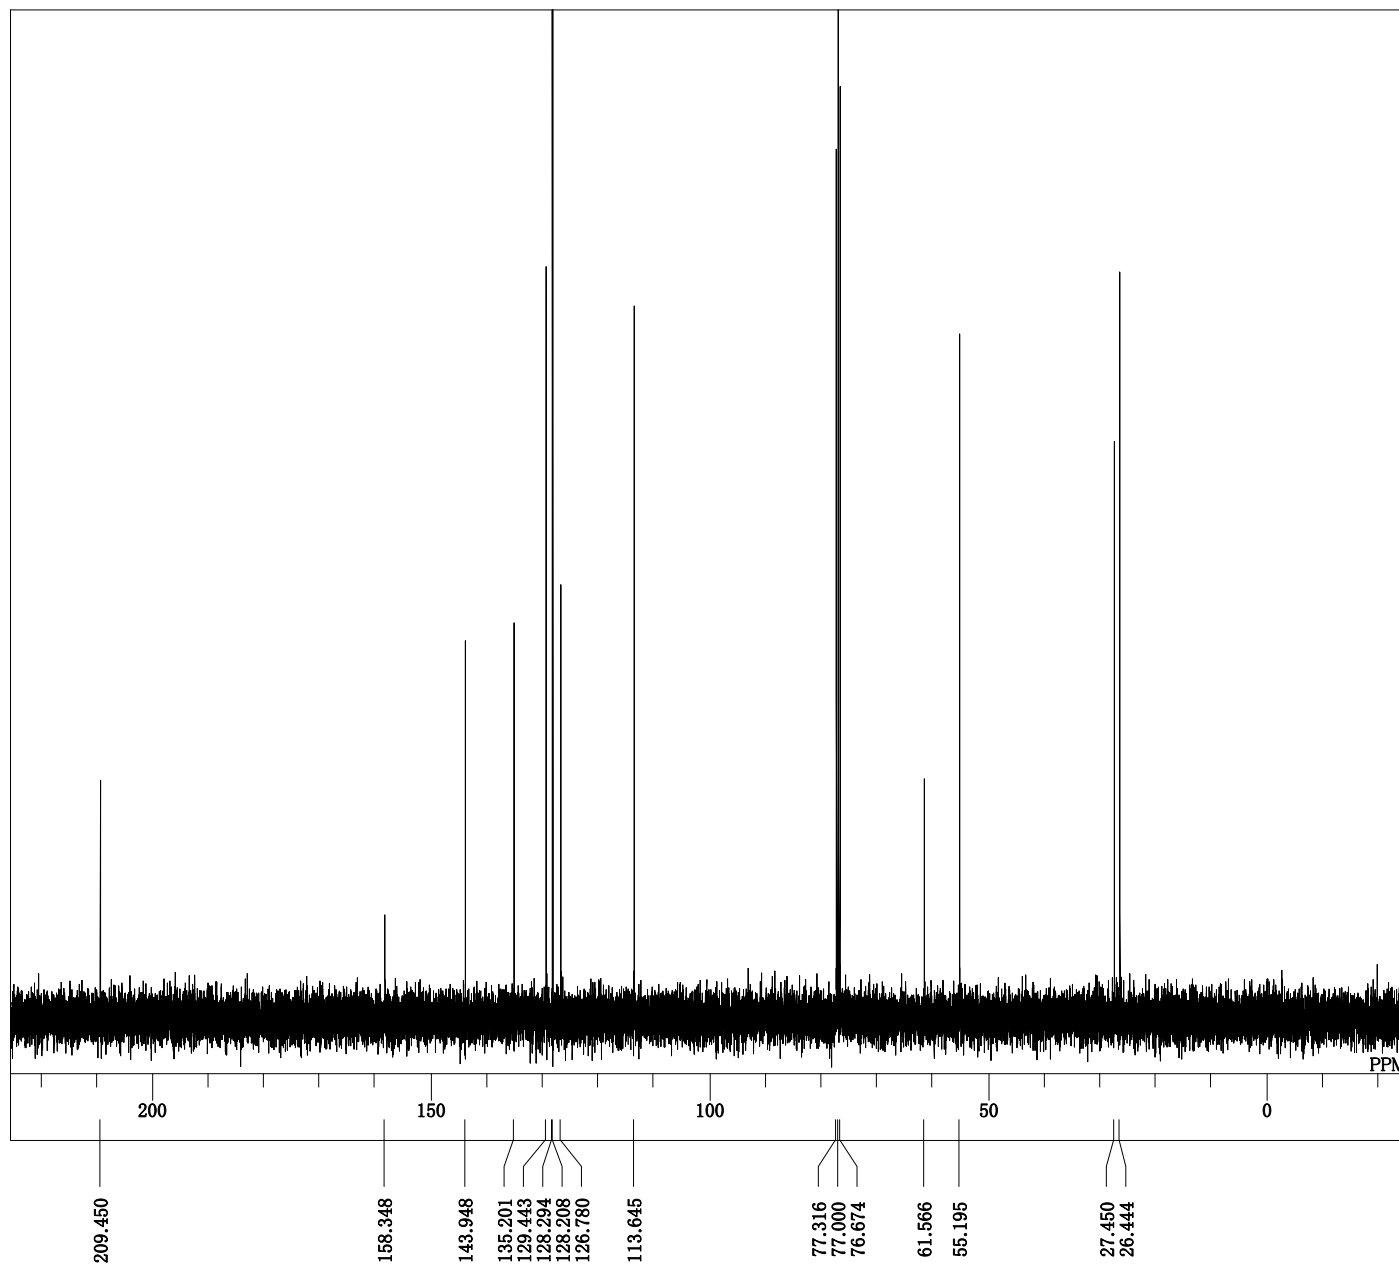

DFILE pro\_diol\_PhPMP\_MeMe\_Carbon.als  
 COMNT single pulse decoupled gated NOE  
 DATIM 2020-09-12 10:05:40  
 OBNUC 13C  
 EXMOD carbon.jxp  
 OBFRQ 99.55 MHz  
 OBSET 5.13 KHz  
 OBFIN 0.98 Hz  
 POINT 26214  
 FREQU 25000.00 Hz  
 SCANS 64  
 ACQTM 1.0486 sec  
 PD 2.0000 sec  
 PW1 3.59 usec  
 IRNUC 1H  
 CTEMP 21.0 c  
 SLVNT CDCL3  
 EXREF 77.00 ppm  
 BF 0.12 Hz  
 RGAIN 50

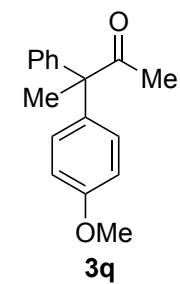

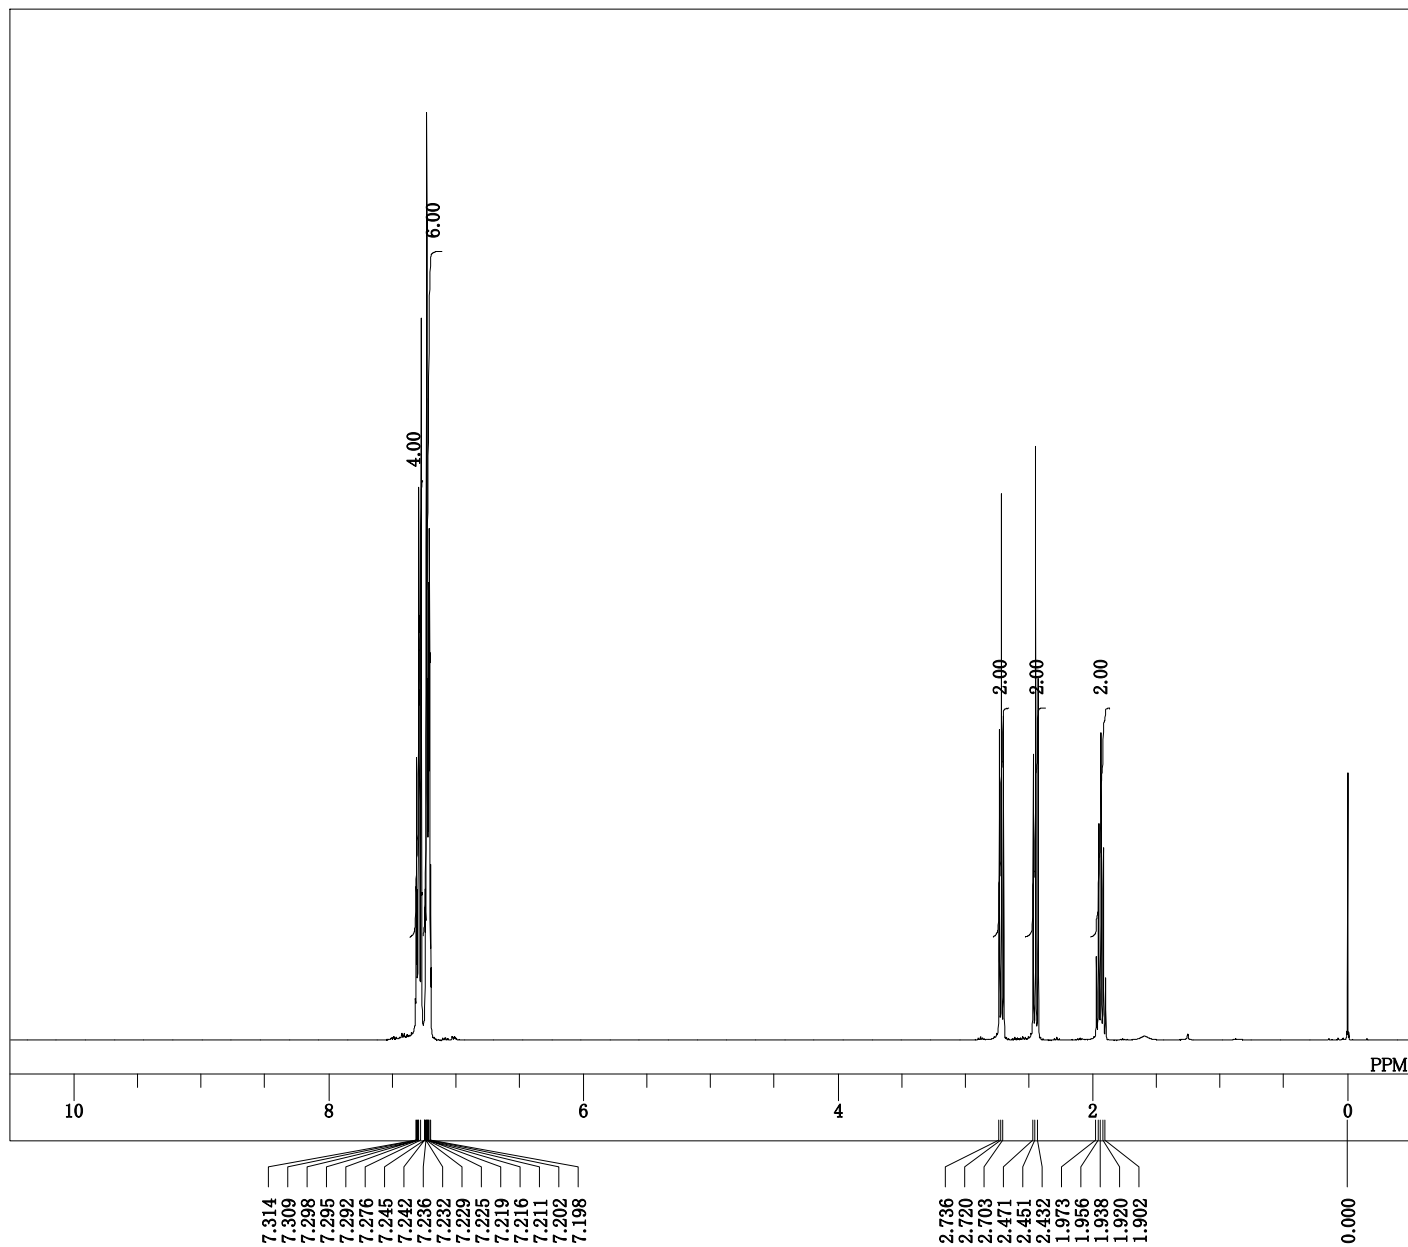

DFILE pro\_cyc\_cyc\_butyl\_Proton.als  
 COMNT single\_pulse  
 DATIM 2020-04-01 15:47:11  
 OBNUC 1H  
 EXMOD proton.jxp  
 OBFRQ 395.88 MHz  
 OBSET 6.28 KHz  
 OBFIN 0.87 Hz  
 POINT 13107  
 FREQU 5938.24 Hz  
 SCANS 8  
 ACQTM 2.2073 sec  
 PD 5.0000 sec  
 PW1 3.14 usec  
 IRNUC 1H  
 CTEMP 19.5 c  
 SLVNT CDCL3  
 EXREF 0.00 ppm  
 BF 0.12 Hz  
 RGAIN 28

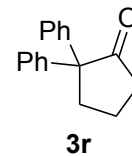

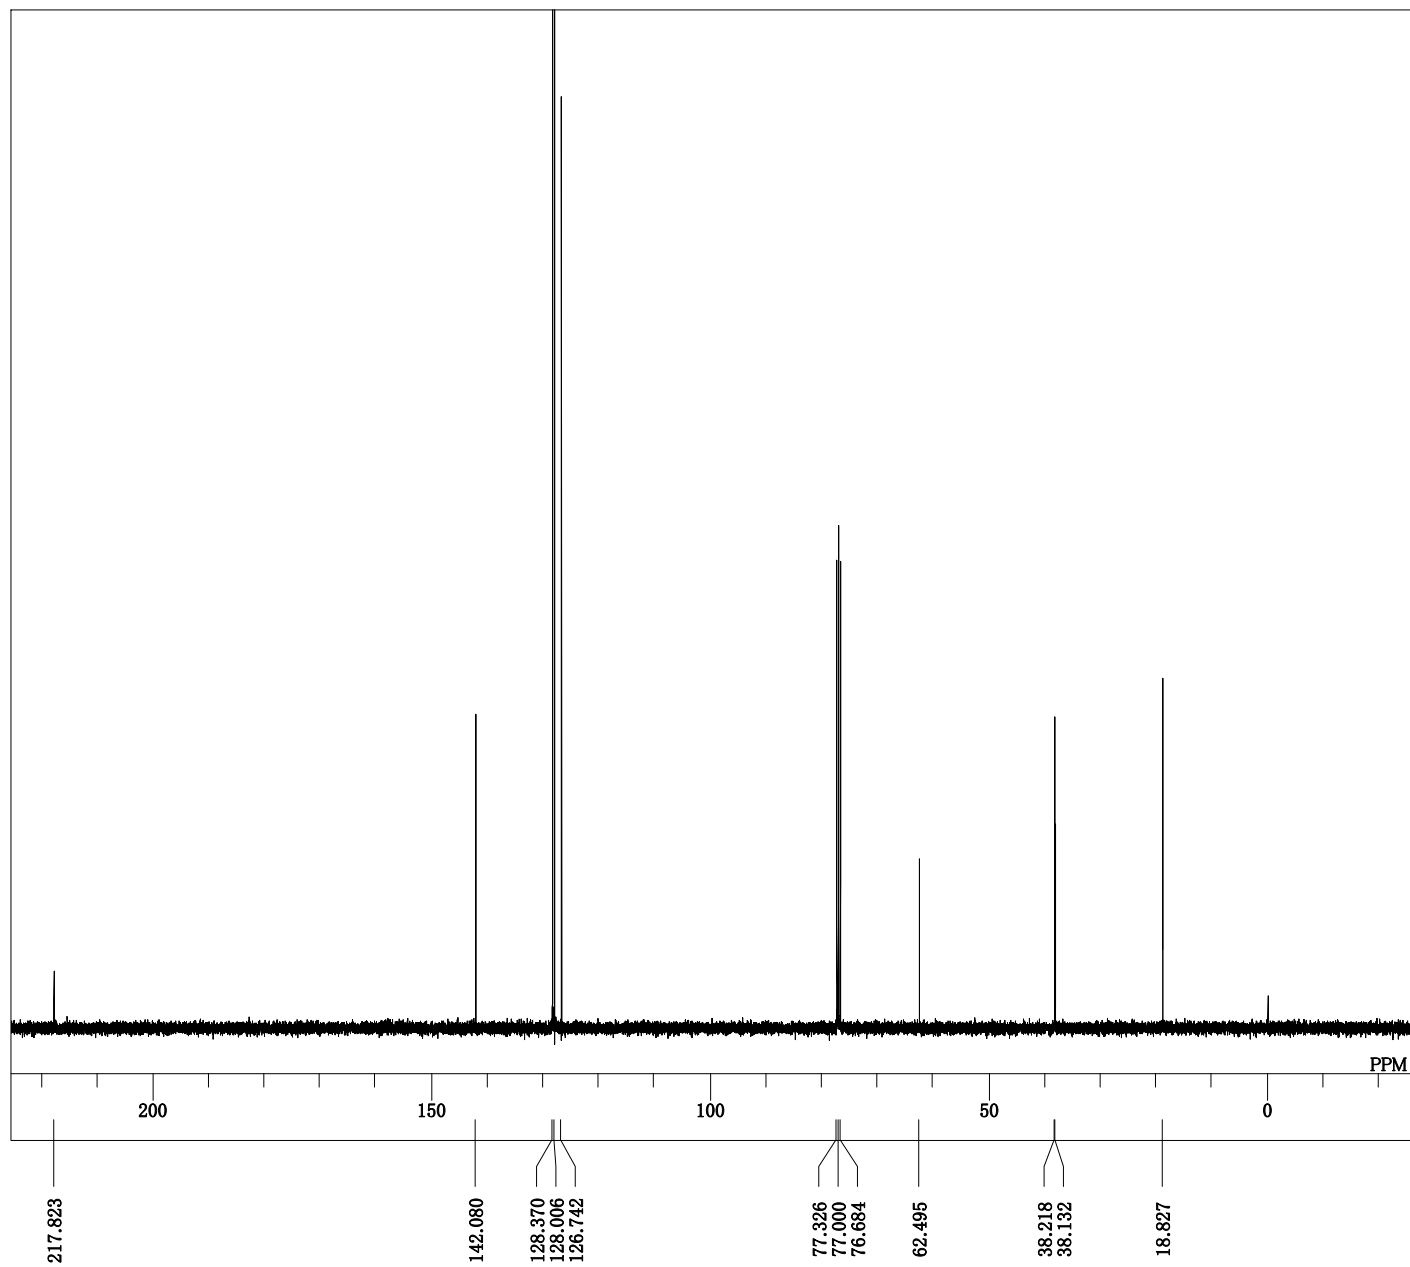

DFILE pro\_cyc\_cyc\_butyl\_Carbon.als  
 COMNT single pulse decoupled gated NOE  
 DATIM 2020-04-01 15:48:24  
 OBNUC 13C  
 EXMOD carbon.jxp  
 OBFRQ 99.55 MHz  
 OBSET 5.13 KHz  
 OBFIN 0.98 Hz  
 POINT 26214  
 FREQU 25000.00 Hz  
 SCANS 372  
 ACQTM 1.0486 sec  
 PD 2.0000 sec  
 PW1 3.59 usec  
 IRNUC 1H  
 CTEMP 19.8 c  
 SLVNT CDCL3  
 EXREF 77.00 ppm  
 BF 0.12 Hz  
 RGAIN 50

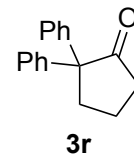

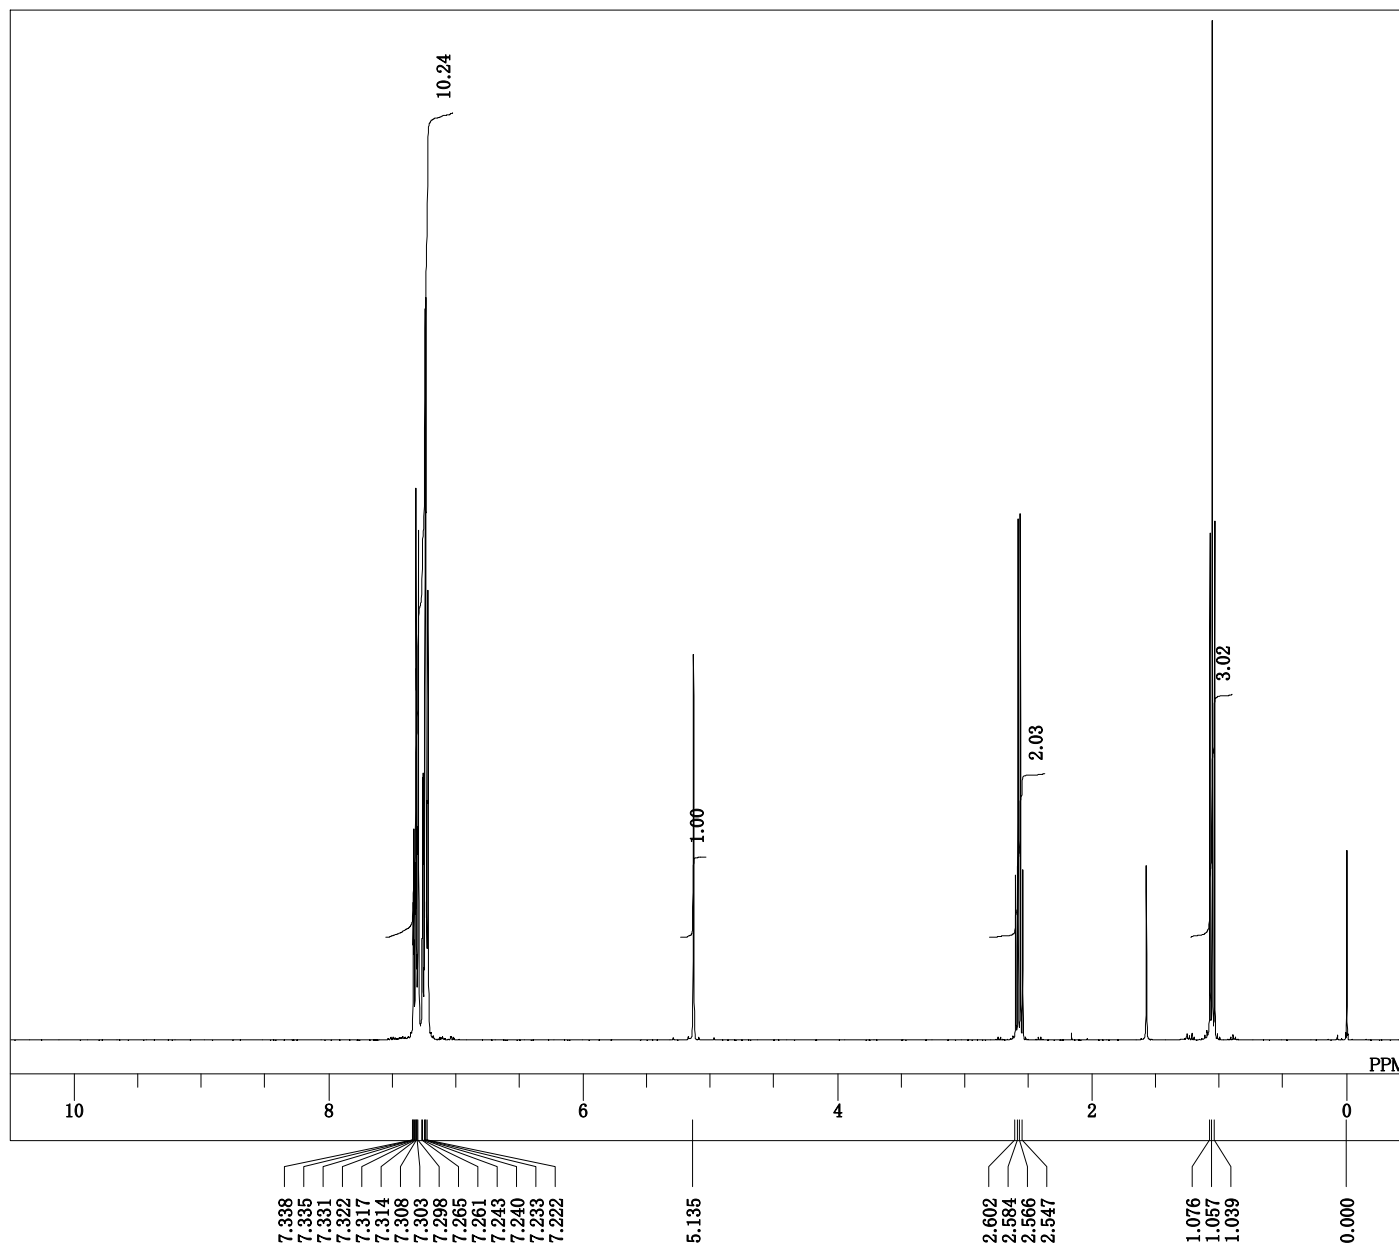

DFILE proton.jxp  
 COMNT single\_pulse  
 DATIM 2020-07-13 13:54:60  
 OBNUC 1H  
 EXMOD proton.jxp  
 OBFRQ 395.88 MHz  
 OBSET 6.28 KHz  
 OBFIN 0.87 Hz  
 POINT 13107  
 FREQU 5938.24 Hz  
 SCANS 8  
 ACQTM 2.2073 sec  
 PD 5.0000 sec  
 PW1 3.14 usec  
 IRNUC 1H  
 CTEMP 20.4 c  
 SLVNT CDCL3  
 EXREF 0.00 ppm  
 BF 0.12 Hz  
 RGAIN 30

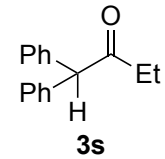

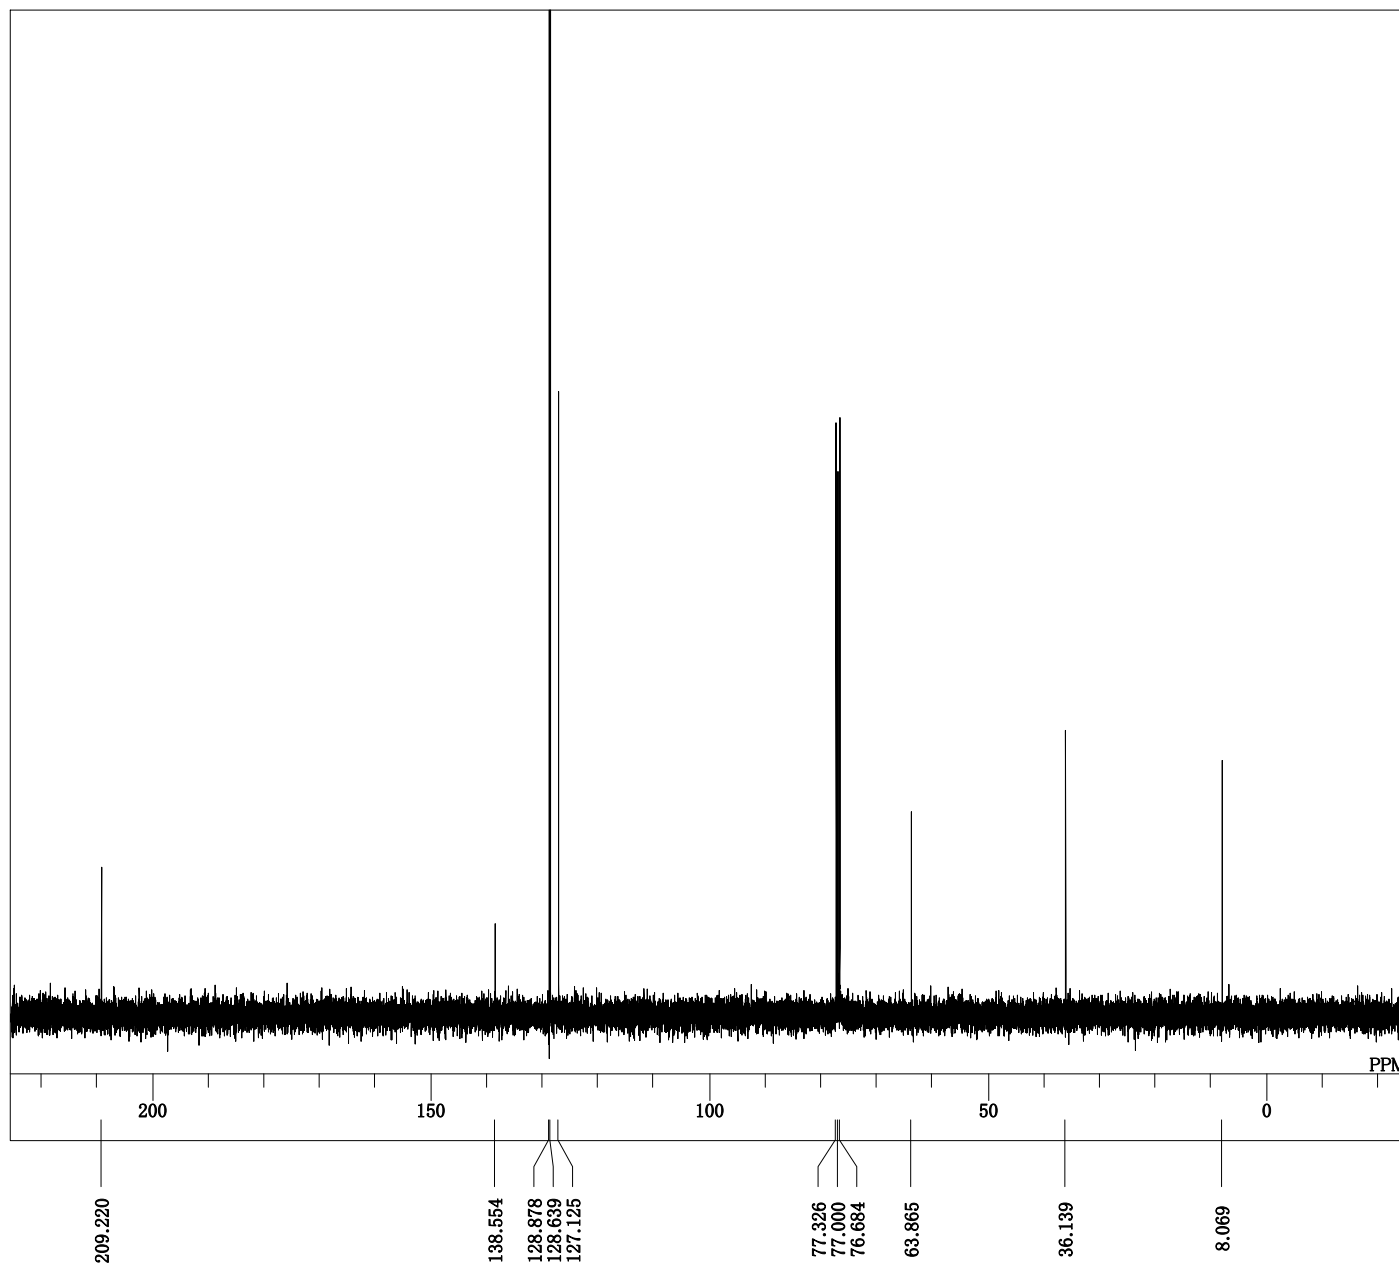

DFILE pro\_diolH\_Et\_Carbon.als  
 COMNT single pulse decoupled gated NOE  
 DATIM 2020-07-13 13:56:12  
 OBNUC <sup>13</sup>C  
 EXMOD carbon.jxp  
 OBFRQ 99.55 MHz  
 OBSET 5.13 KHz  
 OBFIN 0.98 Hz  
 POINT 26214  
 FREQU 25000.00 Hz  
 SCANS 40  
 ACQTM 1.0486 sec  
 PD 2.0000 sec  
 PW1 3.59 usec  
 IRNUC <sup>1</sup>H  
 CTEMP 20.5 c  
 SLVNT CDCL3  
 EXREF 77.00 ppm  
 BF 0.12 Hz  
 RGAIN 50

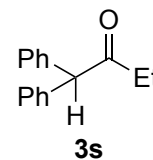

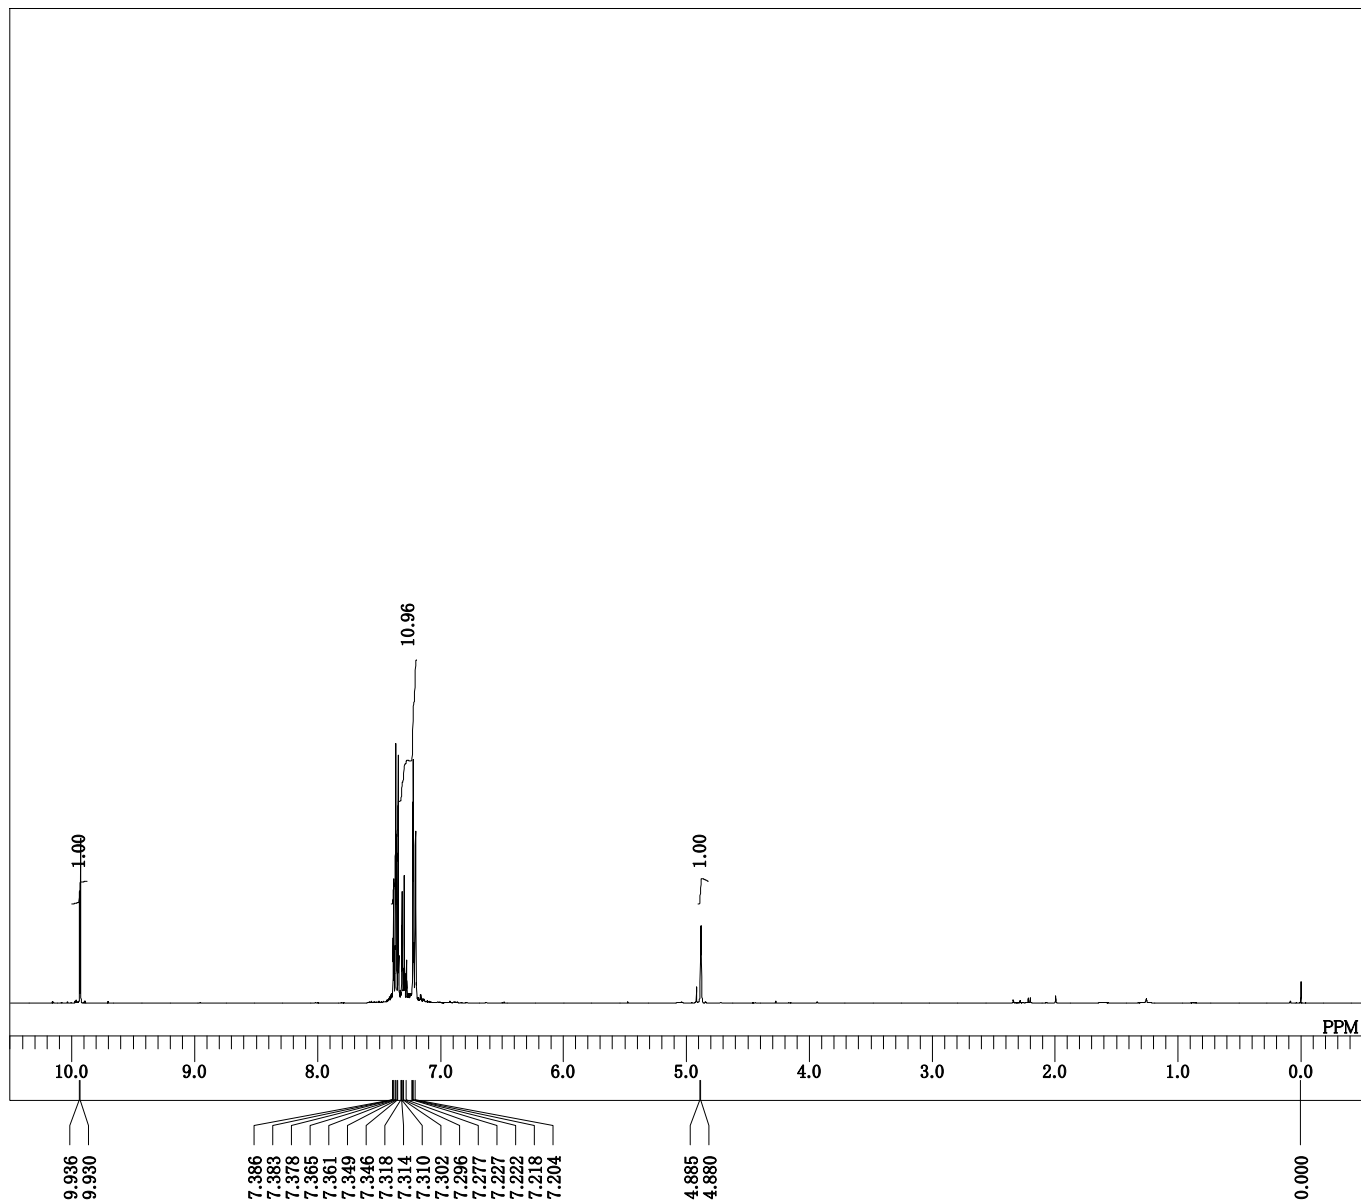

DFILE pro\_diol\_H\_HProton.als  
 COMNT single\_pulse  
 DATIM 2020-12-29 06:43:36  
 OBNUC 1H  
 EXMOD proton.jxp  
 OBFRQ 395.88 MHz  
 OBSET 6.28 KHz  
 OBFIN 0.87 Hz  
 POINT 16384  
 FREQU 7422.80 Hz  
 SCANS 8  
 ACQTM 2.2073 sec  
 PD 5.0000 sec  
 PW1 3.14 usec  
 IRNUC 1H  
 CTEMP 18.3 c  
 SLVNT CDCL3  
 EXREF 0.00 ppm  
 BF 0.12 Hz  
 RGAIN 24

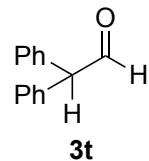



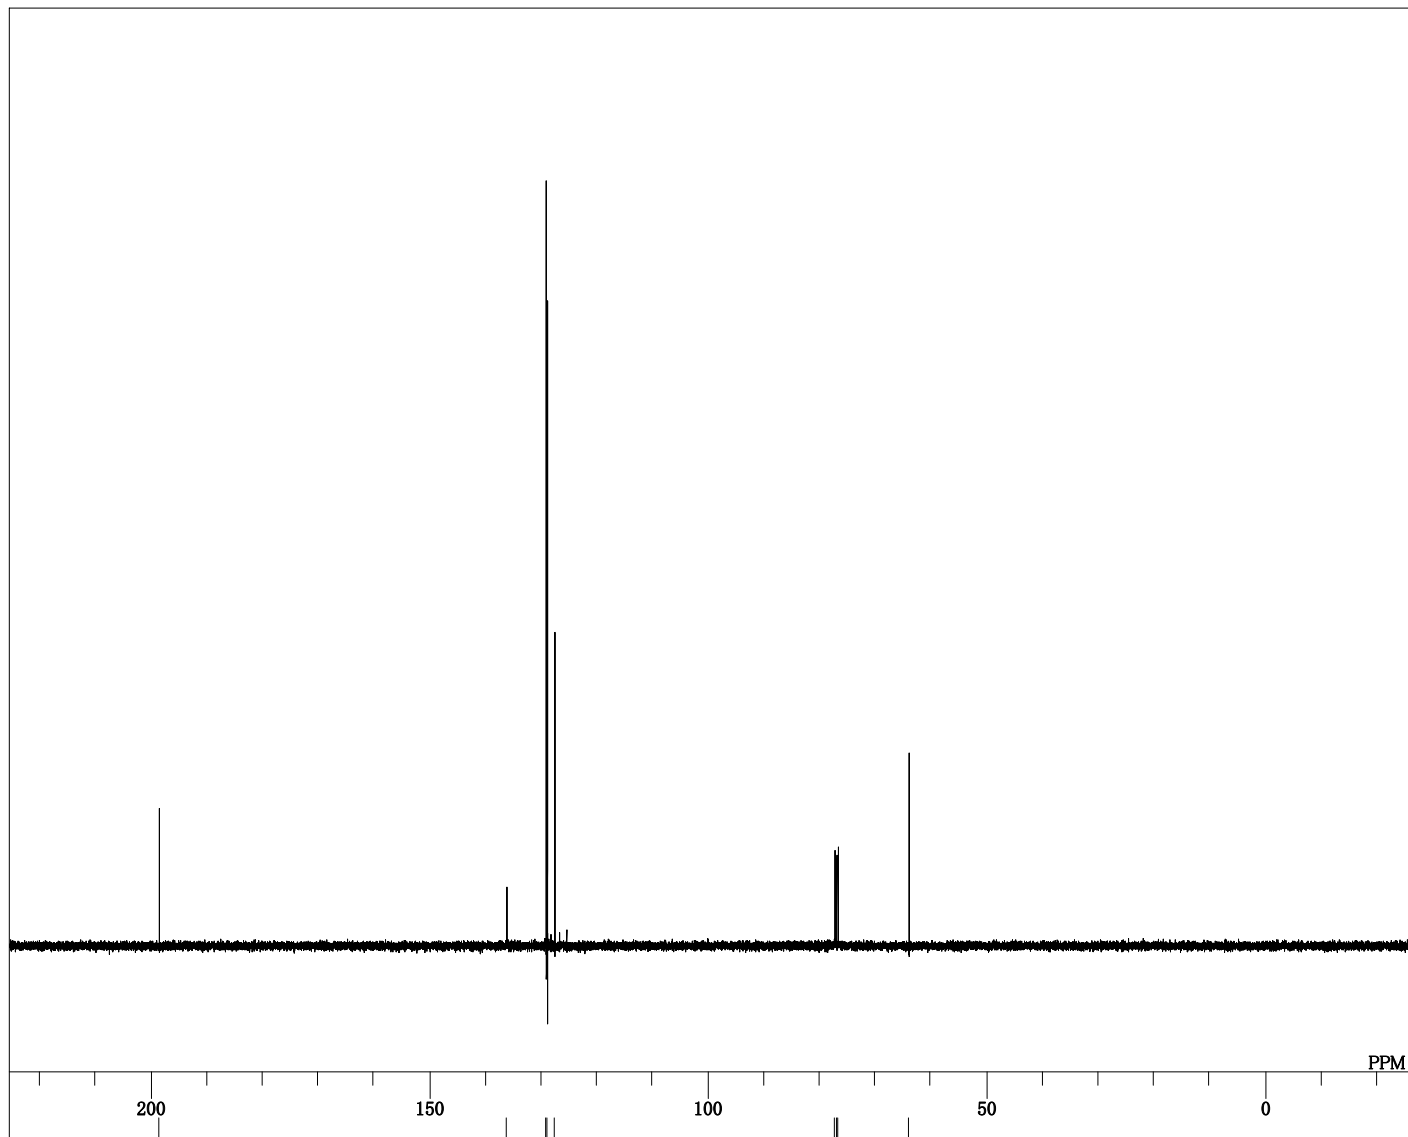

DFILE pro\_diolH\_H\_Carbon.als  
 COMNT single pulse decoupled gated NOE  
 DATIM 2020-12-29 06:44:48  
 OBNUC 13C  
 EXMOD carbon.jxp  
 OBFRQ 99.55 MHz  
 OBSET 5.13 KHz  
 OBFIN 0.98 Hz  
 POINT 32767  
 FREQU 31250.00 MHz  
 SCANS 16  
 ACQTM 1.0486 sec  
 PD 2.0000 sec  
 PW1 3.59 usec  
 IRNUC 1H  
 CTEMP 18.4 c  
 SLVNT CDCL3  
 EXREF 77.00 ppm  
 BF 0.12 Hz  
 RGAIN 50

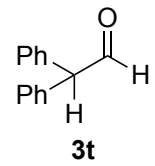

198.536

136.216  
129.098  
128.935  
127.555

77.316  
77.000  
76.674  
64.019

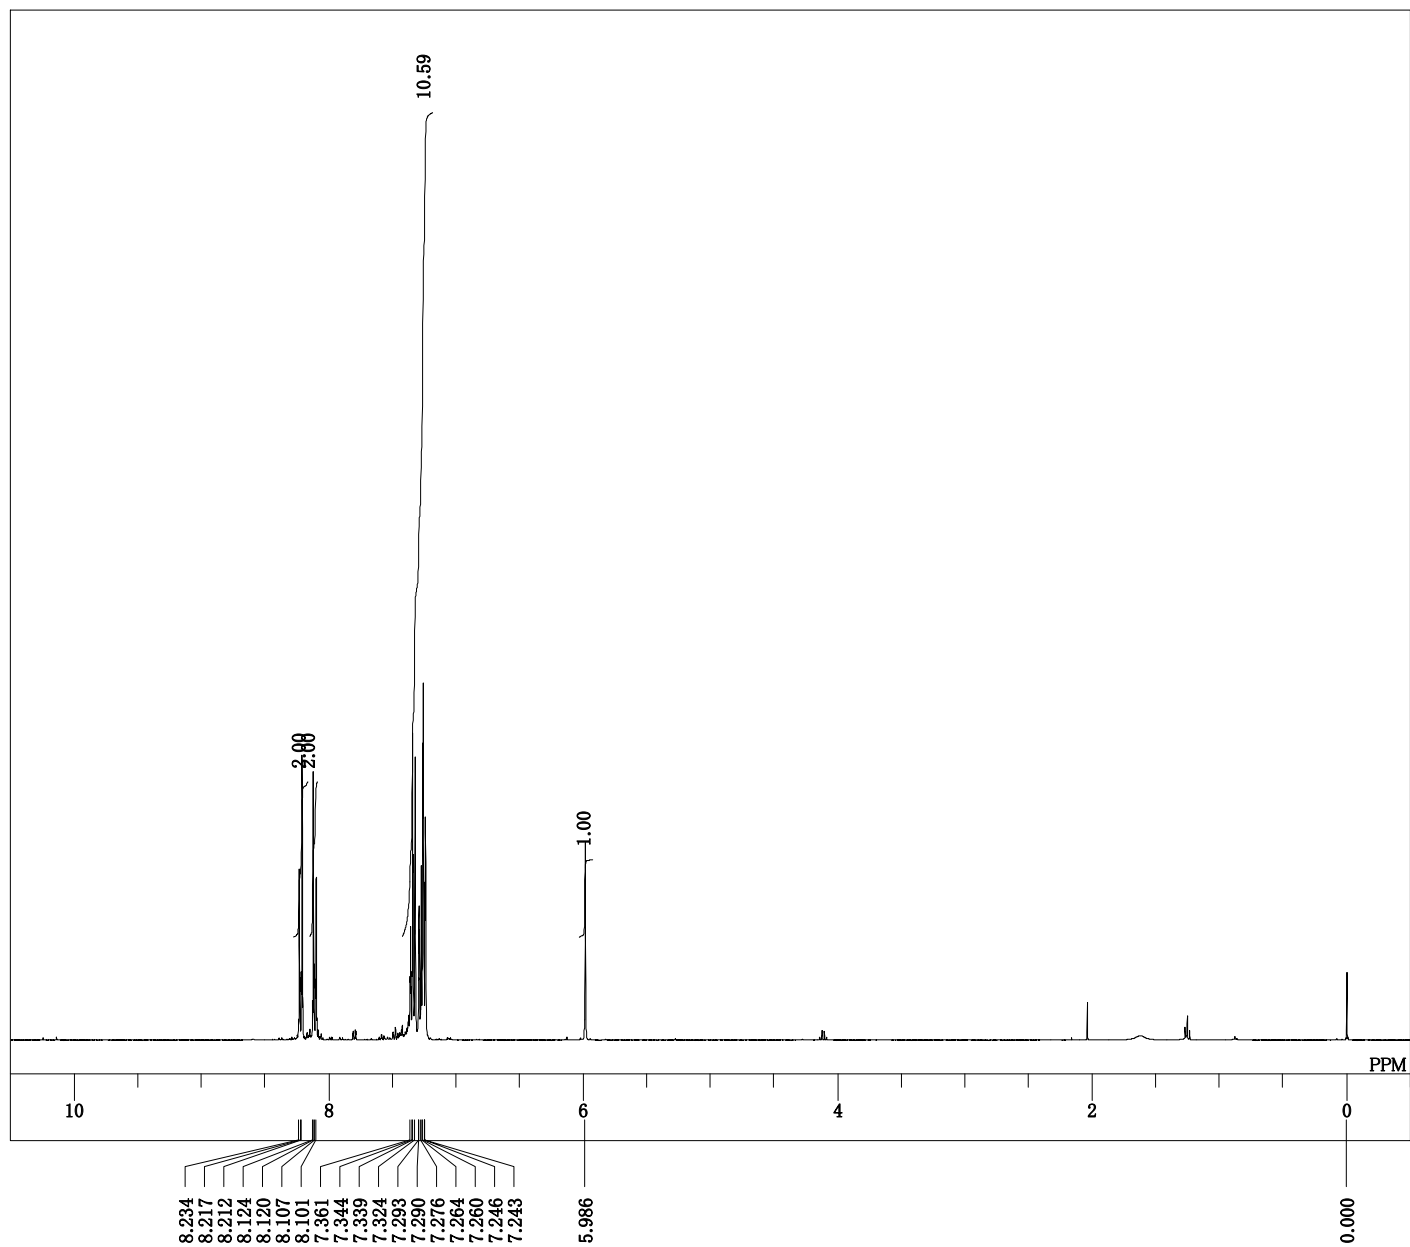

DFILE pro\_diolH\_pNO2\_fr1\_Proton.als  
 COMNT single\_pulse  
 DATIM 2020-07-14 14:29:35  
 OBNUC 1H  
 EXMOD proton.jxp  
 OBFRQ 395.88 MHz  
 OBSET 6.28 KHz  
 OBFIN 0.87 Hz  
 POINT 13107  
 FREQU 5938.24 Hz  
 SCANS 8  
 ACQTM 2.2073 sec  
 PD 5.0000 sec  
 PW1 3.14 usec  
 IRNUC 1H  
 CTEMP 20.5 c  
 SLVNT CDCL3  
 EXREF 0.00 ppm  
 BF 0.12 Hz  
 RGAIN 28

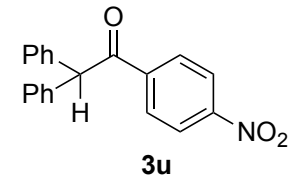

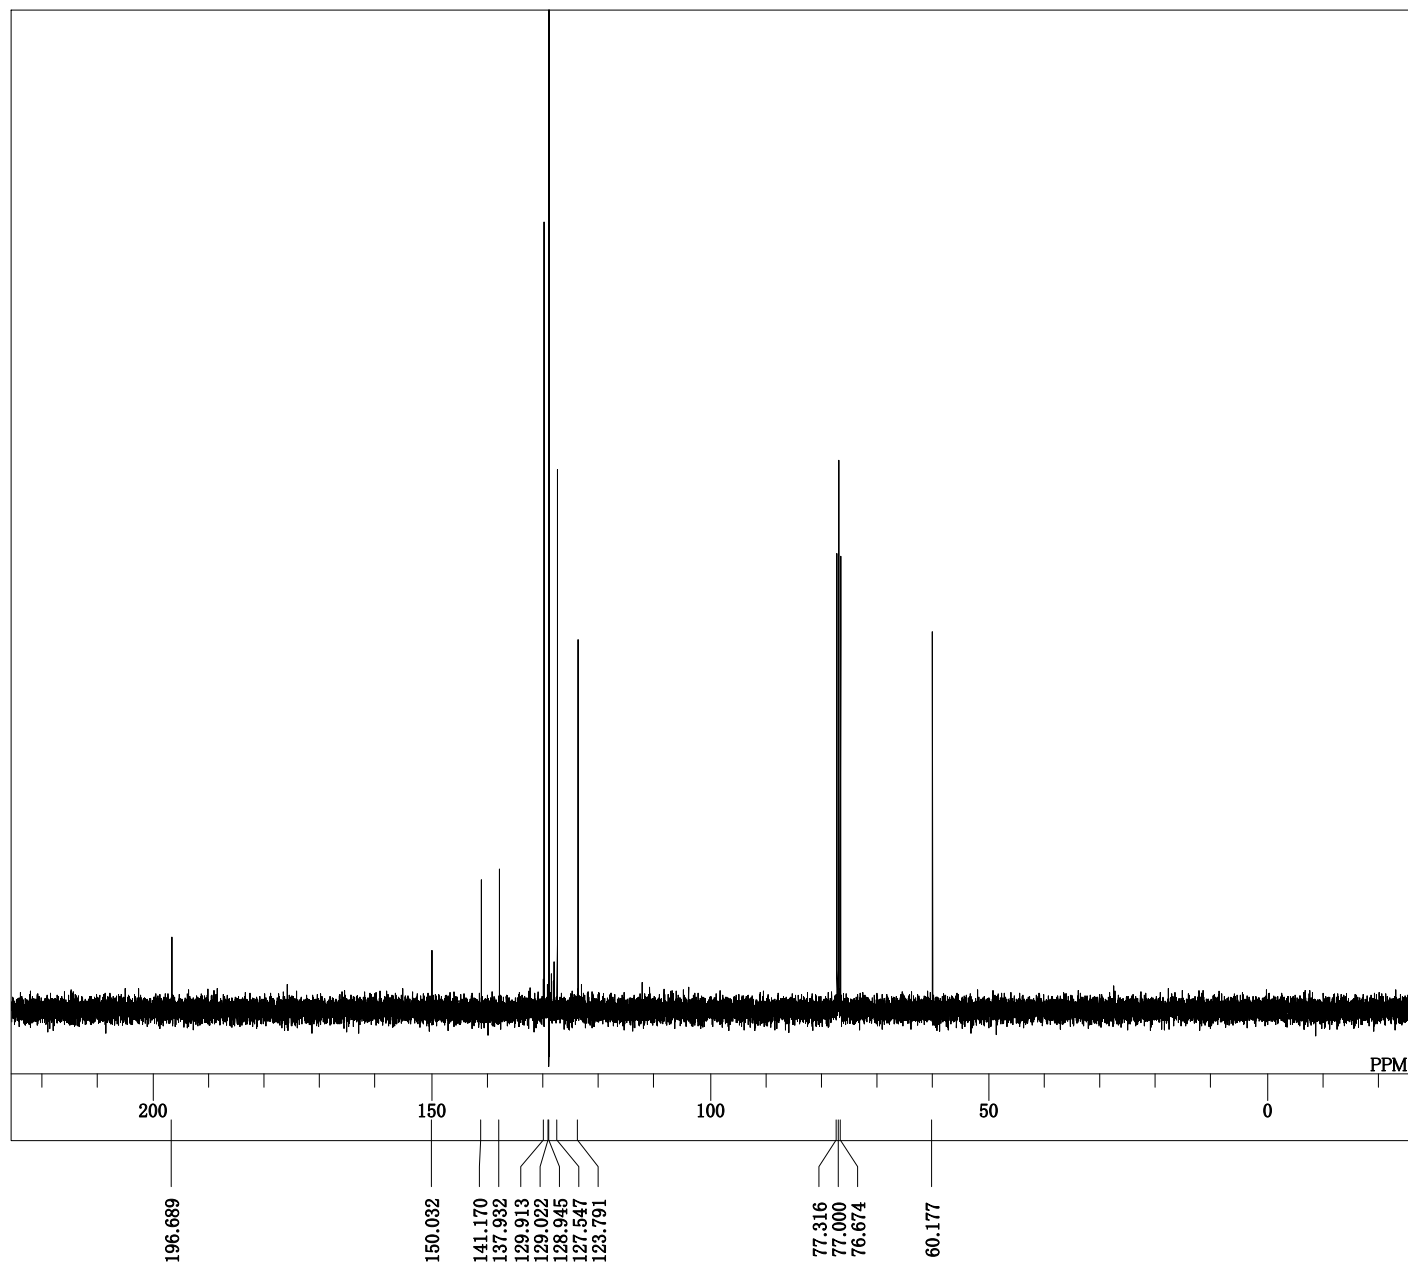

DFILE pro\_diol\_H\_pNO2\_Carbon.als  
 COMNT single pulse decoupled gated NOE  
 DATIM 2020-07-14 14:30:47  
 OBNUC <sup>13</sup>C  
 EXMOD carbon.jxp  
 OBFRQ 99.55 MHz  
 OBSET 5.13 KHz  
 OBFIN 0.98 Hz  
 POINT 26214  
 FREQU 25000.00 Hz  
 SCANS 64  
 ACQTM 1.0486 sec  
 PD 2.0000 sec  
 PW1 3.59 usec  
 IRNUC <sup>1</sup>H  
 CTEMP 20.7 c  
 SLVNT CDCL<sub>3</sub>  
 EXREF 77.00 ppm  
 BF 0.12 Hz  
 RGAIN 50

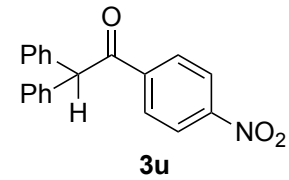

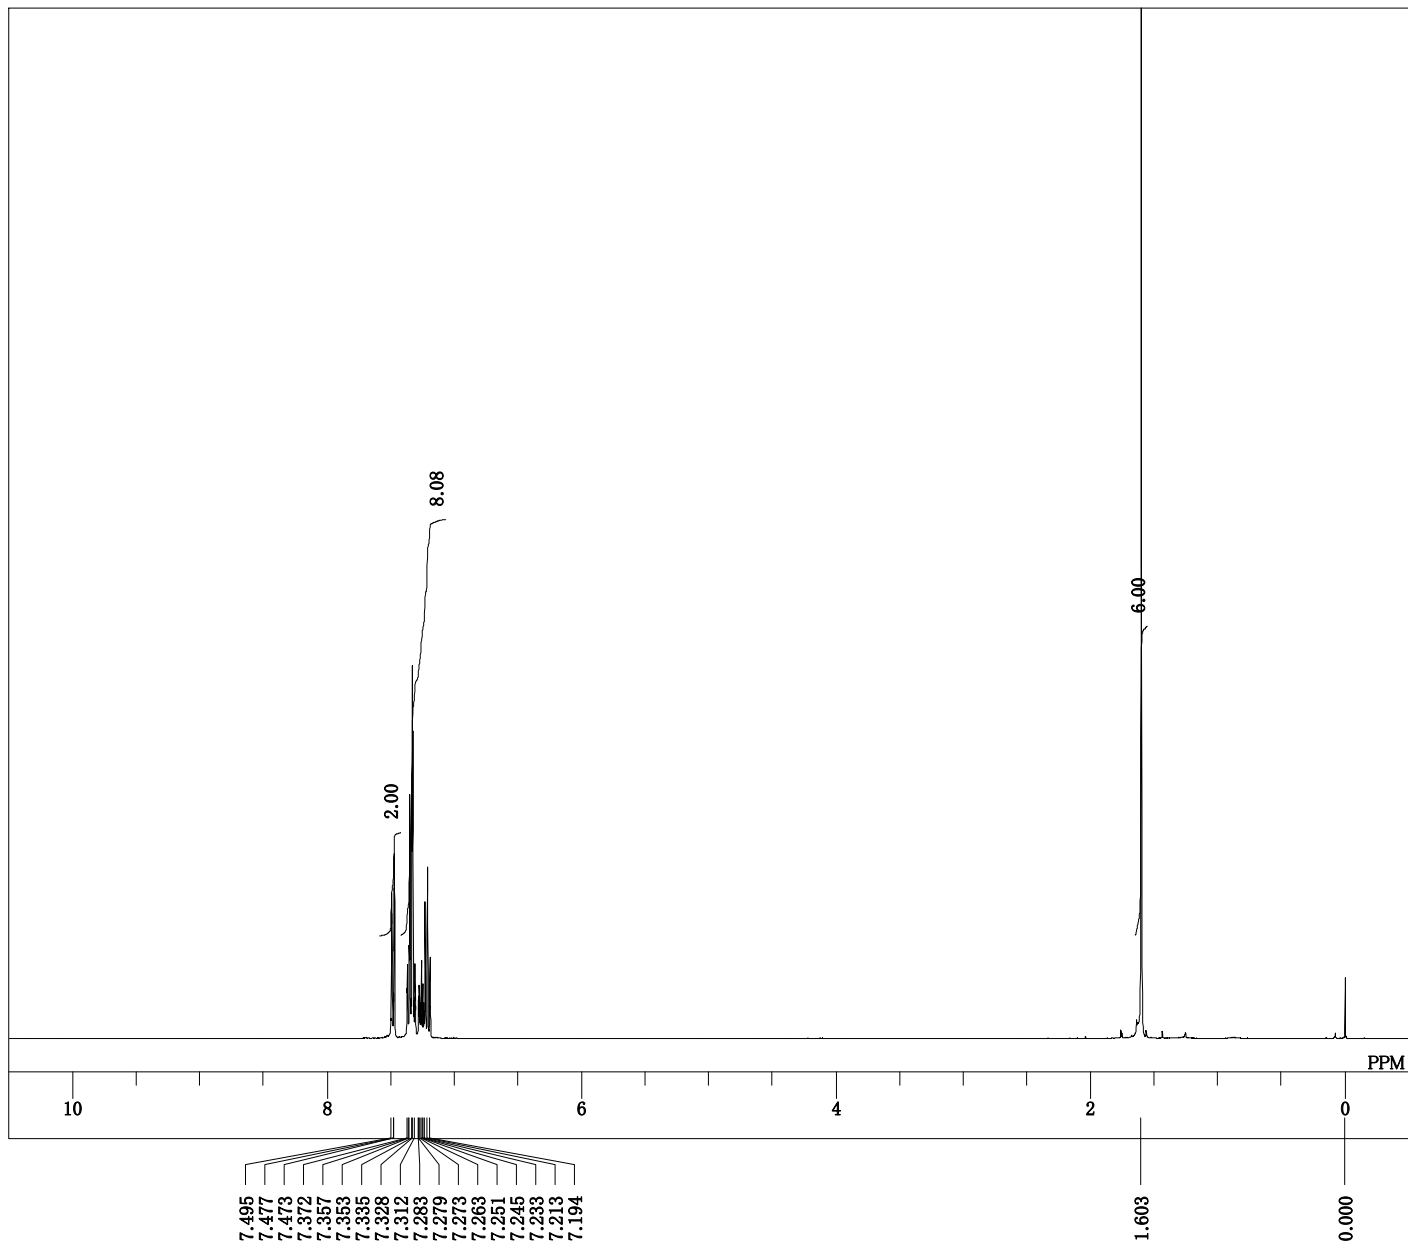

DFILE pro\_cyc.Me\_Me\_Proton.als  
 COMNT single\_pulse  
 DATIM 2020-04-01 14:29:32  
 OBNUC 1H  
 EXMOD proton.jxp  
 OBFRQ 395.88 MHz  
 OBSET 6.28 KHz  
 OBFIN 0.87 Hz  
 POINT 13107  
 FREQU 5938.24 Hz  
 SCANS 8  
 ACQTM 2.2073 sec  
 PD 5.0000 sec  
 PW1 3.14 usec  
 IRNUC 1H  
 CTEMP 19.8 c  
 SLVNT CDCL3  
 EXREF 0.00 ppm  
 BF 0.12 Hz  
 RGAIN 26

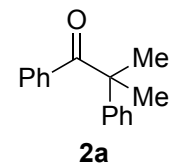

DFILE pro\_cyc\_Me\_Me\_Carbon.als  
 COMNT single pulse decoupled gated NOE  
 DATIM 2020-04-01 14:30:45  
 OBNUC <sup>13</sup>C  
 EXMOD carbon.jxp  
 OBFRQ 99.55 MHz  
 OBSET 5.13 KHz  
 OBFIN 0.98 Hz  
 POINT 26214  
 FREQU 25000.00 Hz  
 SCANS 352  
 ACQTM 1.0486 sec  
 PD 2.0000 sec  
 PW1 3.59 usec  
 IRNUC <sup>1</sup>H  
 CTEMP 20.5 c  
 SLVNT CDCL<sub>3</sub>  
 EXREF 77.00 ppm  
 BF 0.12 Hz  
 RGAIN 50

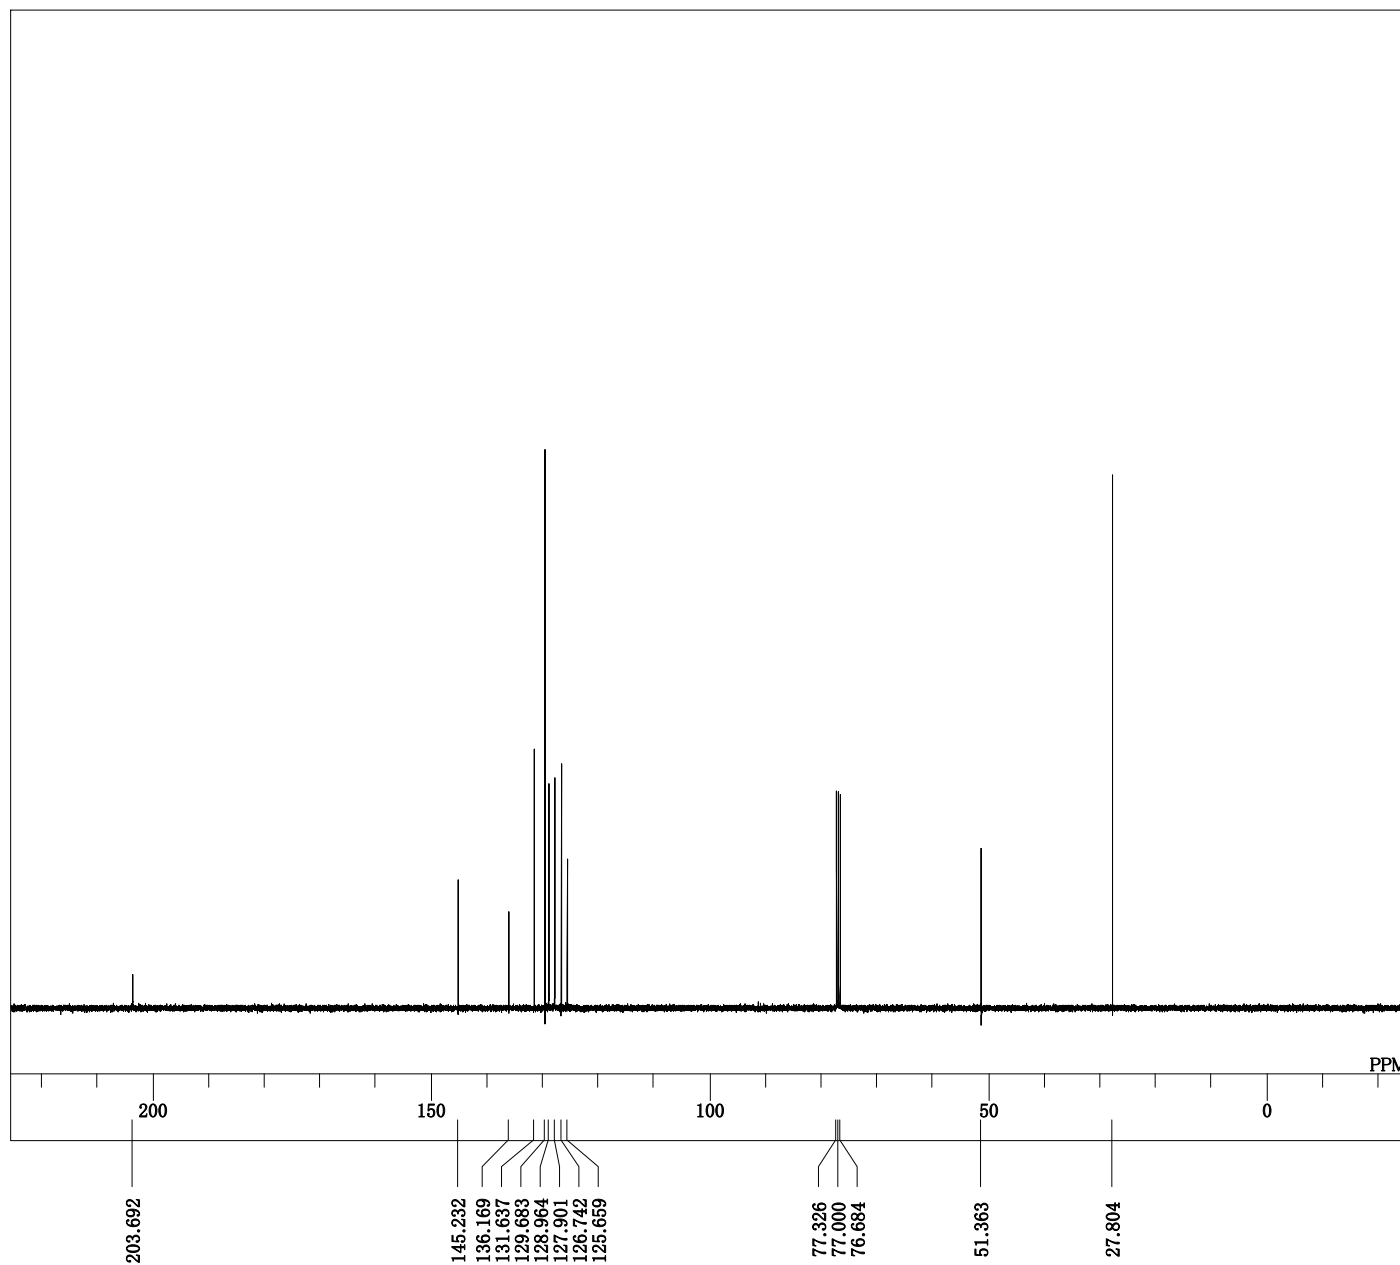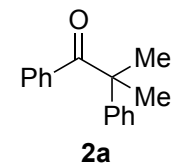

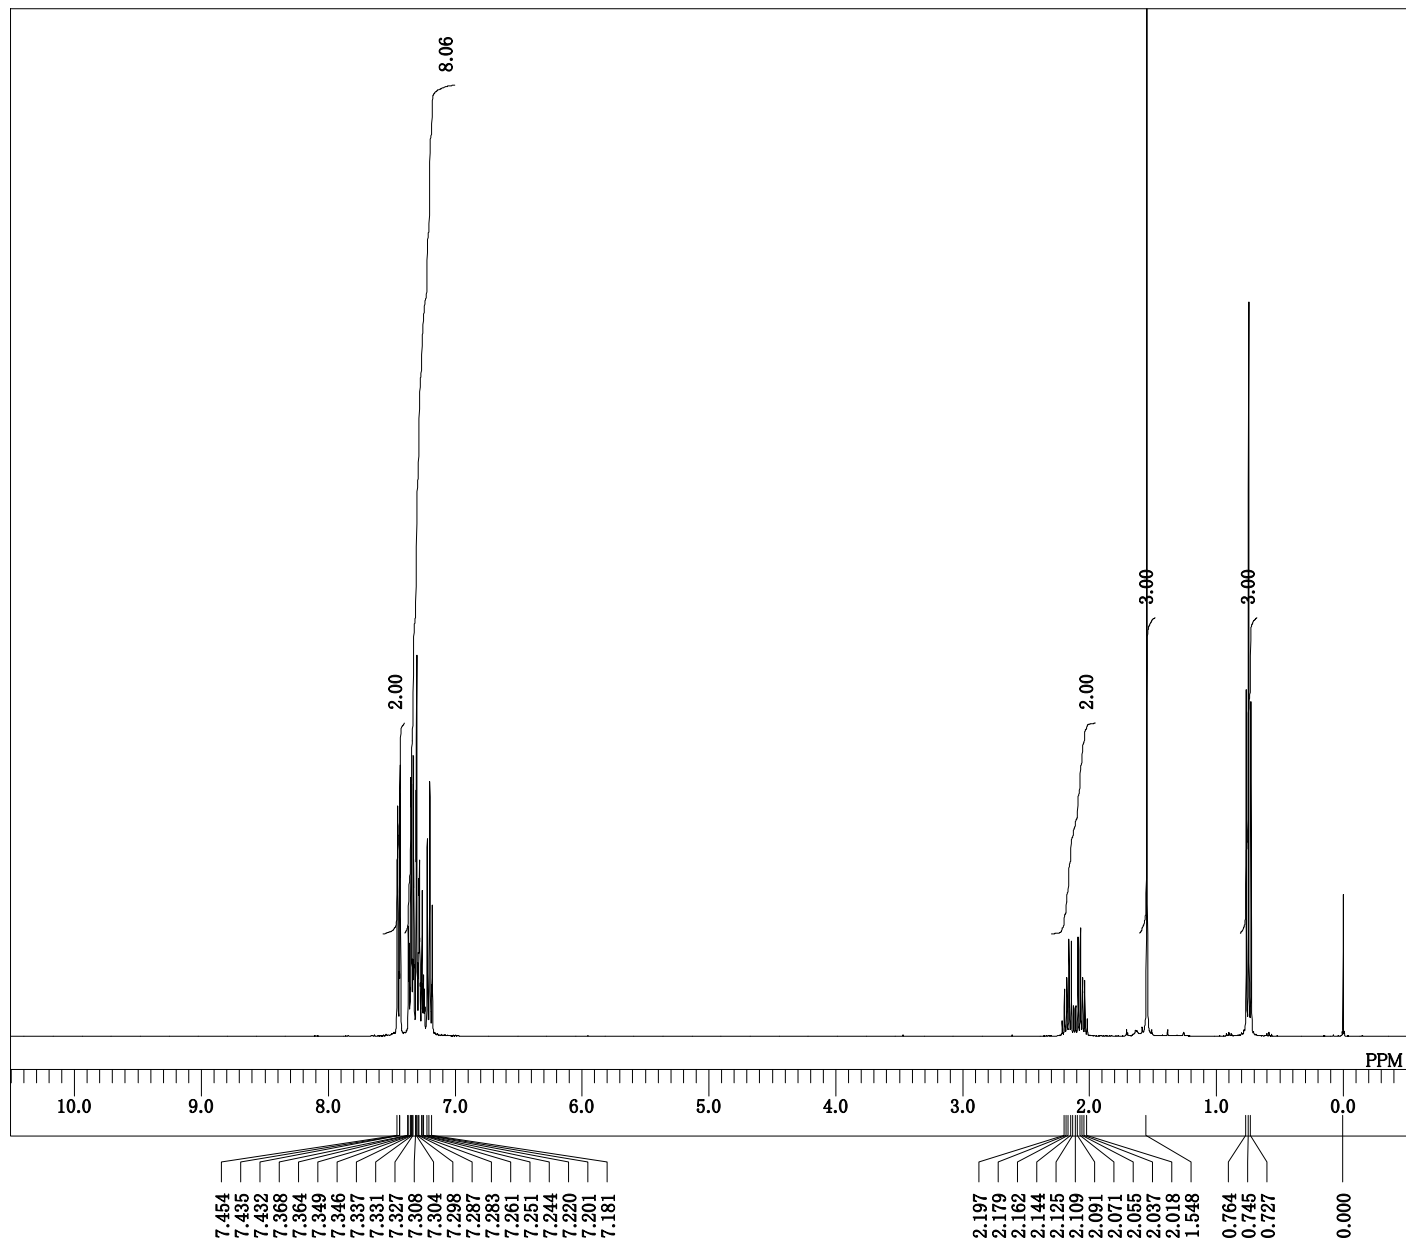

DFILE pro\_cyc\_Me\_Et\_Proton.als  
 COMNT single pulse  
 DATIM 2020-03-31 18:29:32  
 OBNUC 1H  
 EXMOD proton.jxp  
 OBFRQ 395.88 MHz  
 OBSET 6.28 KHz  
 OBFIN 0.87 Hz  
 POINT 13107  
 FREQU 5938.24 Hz  
 SCANS 8  
 ACQTM 2.2073 sec  
 PD 5.0000 sec  
 PW1 3.14 usec  
 IRNUC 1H  
 CTEMP 19.8 c  
 SLVNT CDCL3  
 EXREF 0.00 ppm  
 BF 0.12 Hz  
 RGAIN 24

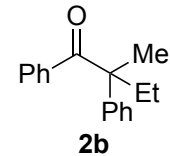

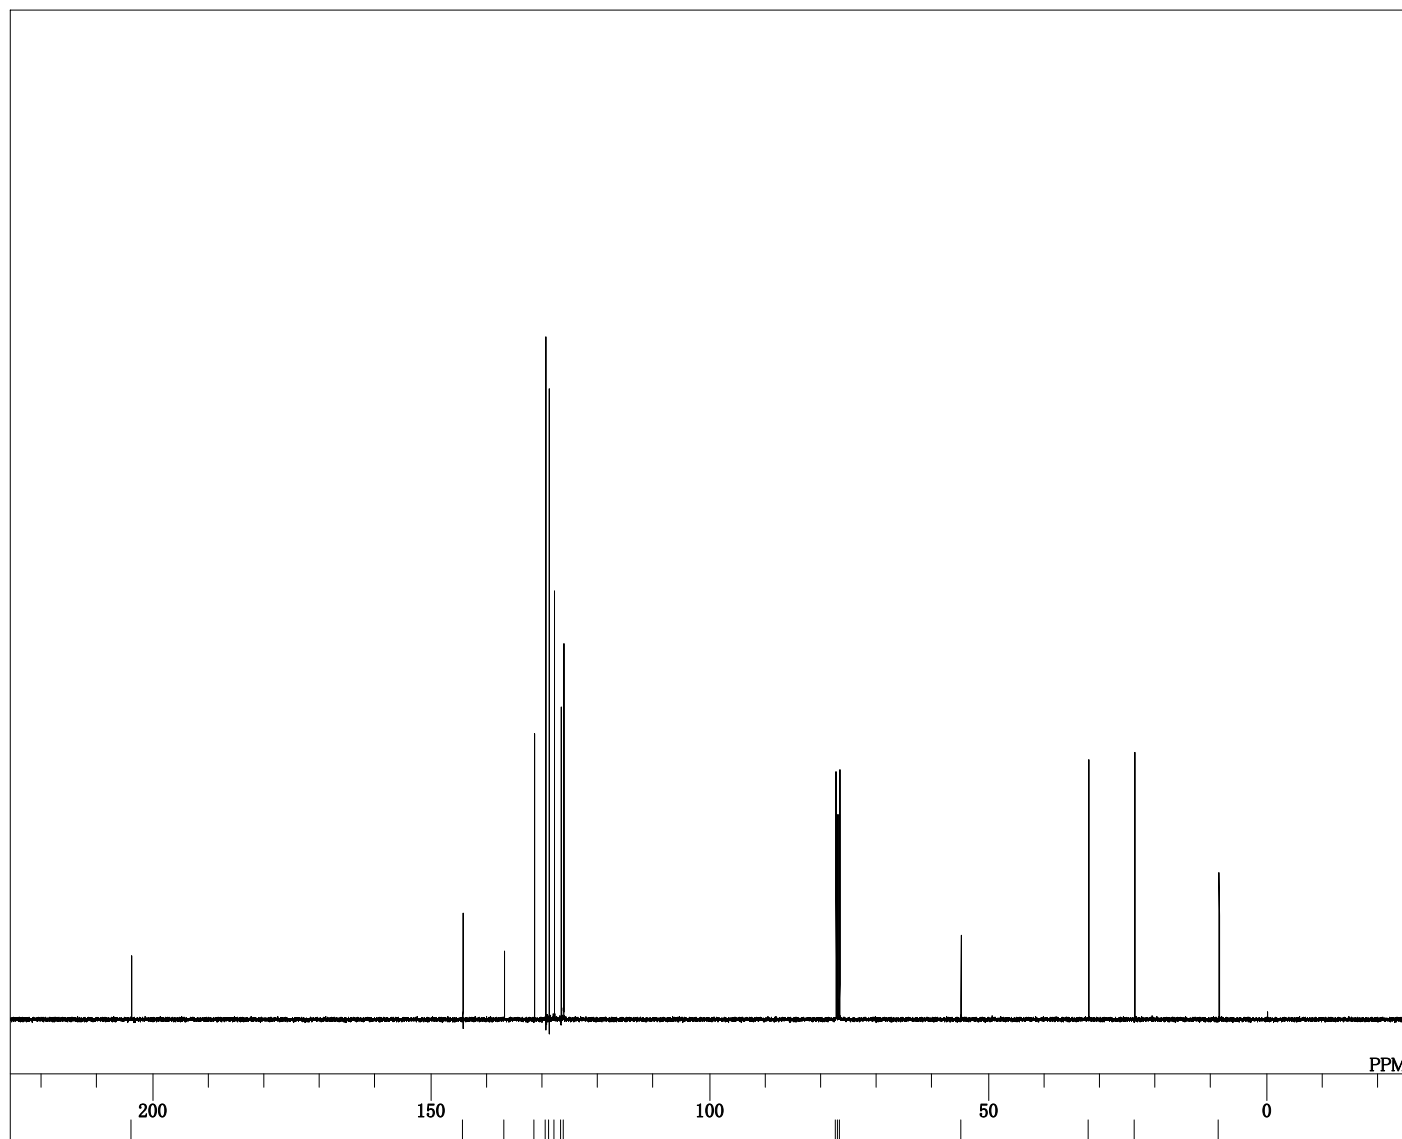

DFILE pro\_cyc.Me\_Et\_Carbon.als  
 COMNT single pulse decoupled gated NOE  
 DATIM 2020-03-31 18:30:44  
 OBNUC 13C  
 EXMOD carbon.jxp  
 OBFRQ 99.55 MHz  
 OBSET 5.13 KHz  
 OBFIN 0.98 Hz  
 POINT 26214  
 FREQU 25000.00 Hz  
 SCANS 1024  
 ACQTM 1.0486 sec  
 PD 2.0000 sec  
 PW1 3.59 usec  
 IRNUC 1H  
 CTEMP 20.0 c  
 SLVNT CDCL3  
 EXREF 77.00 ppm  
 BF 0.12 Hz  
 RGAIN 50

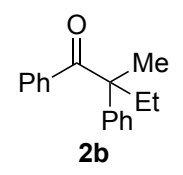

203.769

144.322  
136.878  
131.513  
129.405  
128.849  
127.882  
126.723  
126.234

77.326  
77.000  
76.684

54.917

32.020  
23.704

8.605

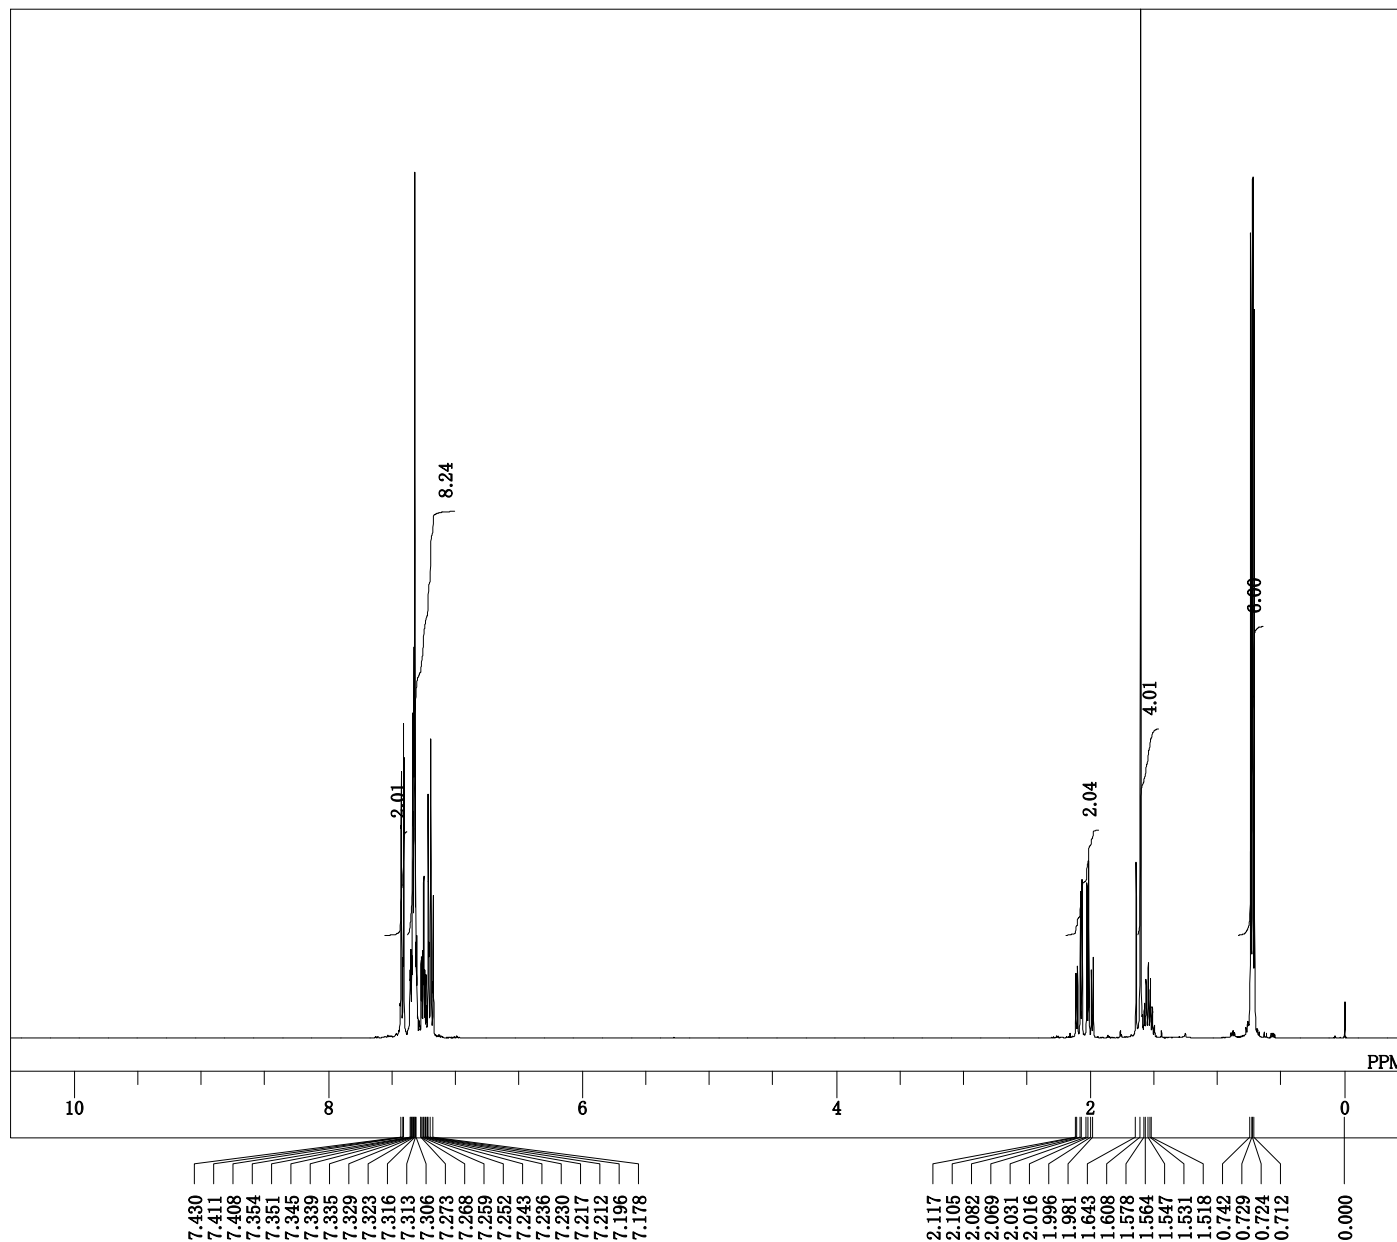

DFILE pro\_cyc\_Me\_iBu\_Proton.als  
 COMNT single\_pulse  
 DATIM 2020-07-06 16:45:46  
 OBNUC 1H  
 EXMOD proton.jxp  
 OBFRQ 395.88 MHz  
 OBSET 6.28 KHz  
 OBFIN 0.87 Hz  
 POINT 13107  
 FREQU 5938.24 Hz  
 SCANS 8  
 ACQTM 2.2073 sec  
 PD 5.0000 sec  
 PW1 3.14 usec  
 IRNUC 1H  
 CTEMP 20.7 c  
 SLVNT CDCL3  
 EXREF 0.00 ppm  
 BF 0.12 Hz  
 RGAIN 24

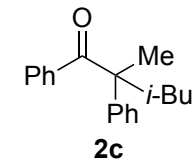



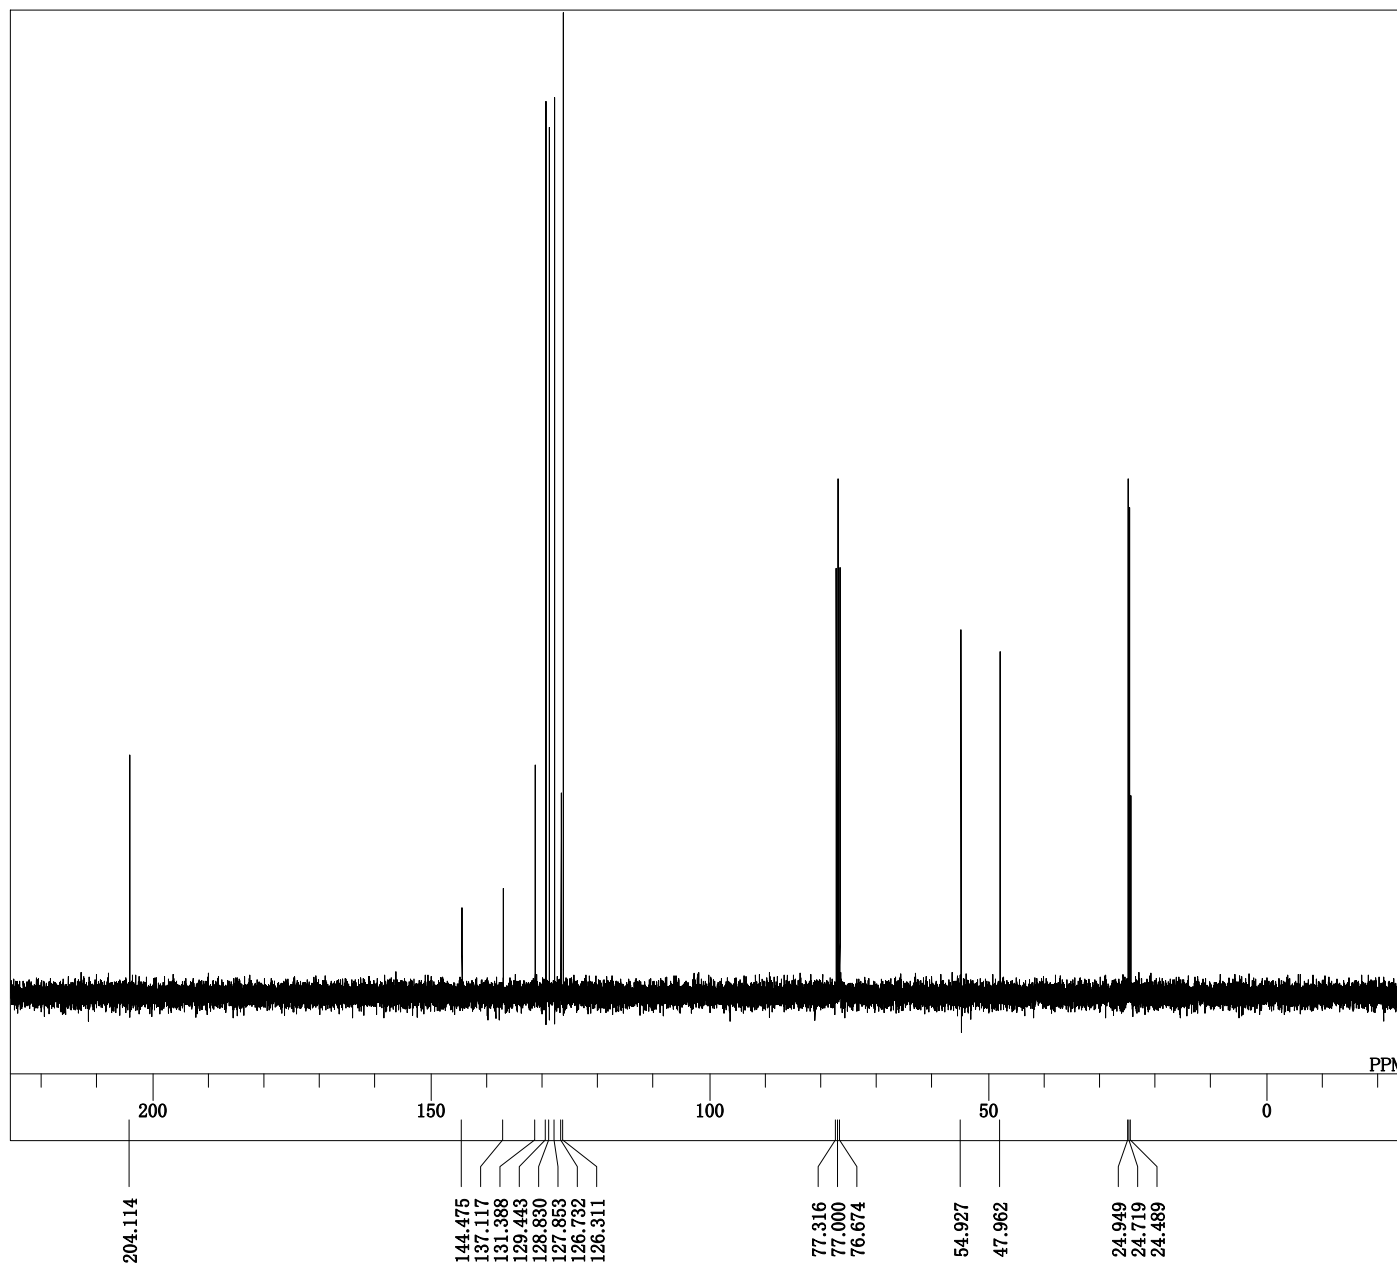

DFILE pro\_cyc\_Me\_iBu\_Carbon.als  
 COMNT single pulse decoupled gated NOE  
 DATIM 2020-07-06 16:46:59  
 OBNUC 13C  
 EXMOD carbon.jxp  
 OBFRQ 99.55 MHz  
 OBSET 5.13 KHz  
 OBFIN 0.98 Hz  
 POINT 26214  
 FREQU 25000.00 Hz  
 SCANS 88  
 ACQTM 1.0486 sec  
 PD 2.0000 sec  
 PW1 3.59 usec  
 IRNUC 1H  
 CTEMP 20.9 c  
 SLVNT CDCL3  
 EXREF 77.00 ppm  
 BF 0.12 Hz  
 RGAIN 50

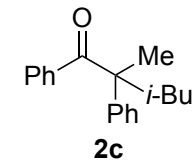

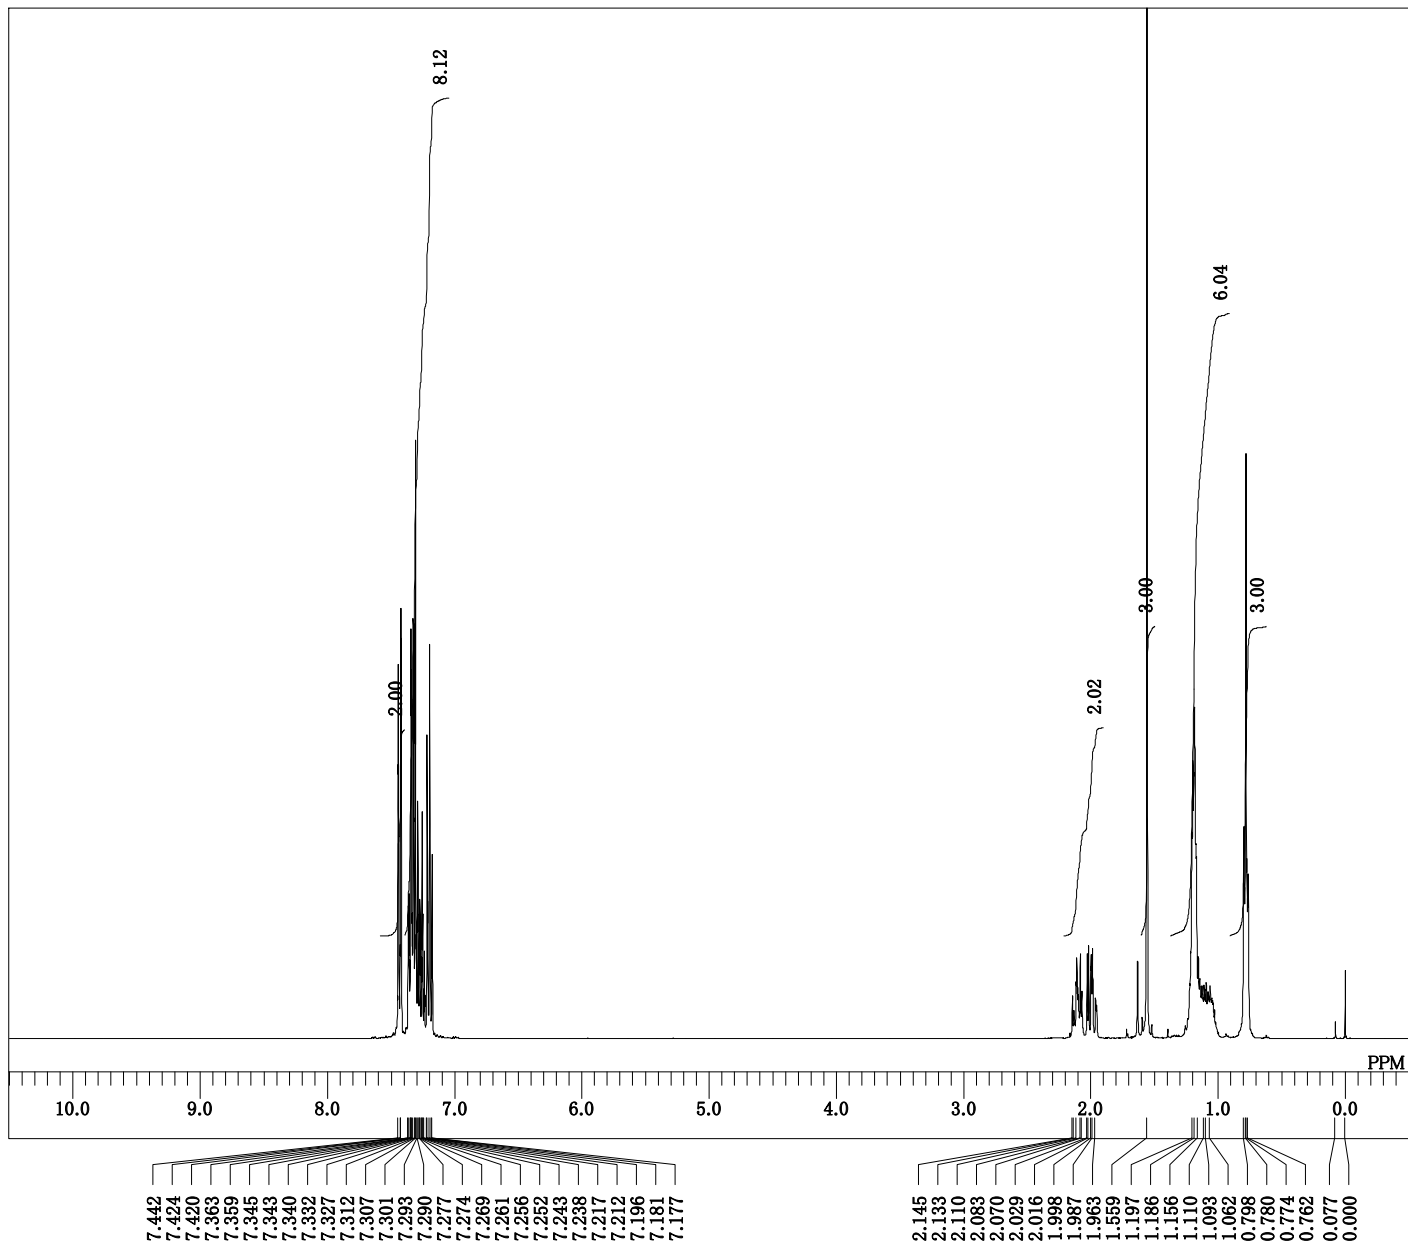

DFILE pro\_cyc.Me\_nPentylProton.als  
 COMNT single\_pulse  
 DATIM 2020-07-05 16:55:24  
 OBNUC 1H  
 EXMOD proton.jxp  
 OBFRQ 395.88 MHz  
 OBSET 6.28 KHz  
 OBFIN 0.87 Hz  
 POINT 13107  
 FREQU 5938.24 Hz  
 SCANS 8  
 ACQTM 2.2073 sec  
 PD 5.0000 sec  
 PW1 3.14 usec  
 IRNUC 1H  
 CTEMP 20.8 c  
 SLVNT CDCL3  
 EXREF 0.00 ppm  
 BF 0.12 Hz  
 RGAIN 22

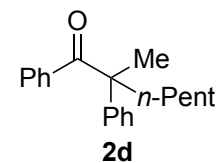

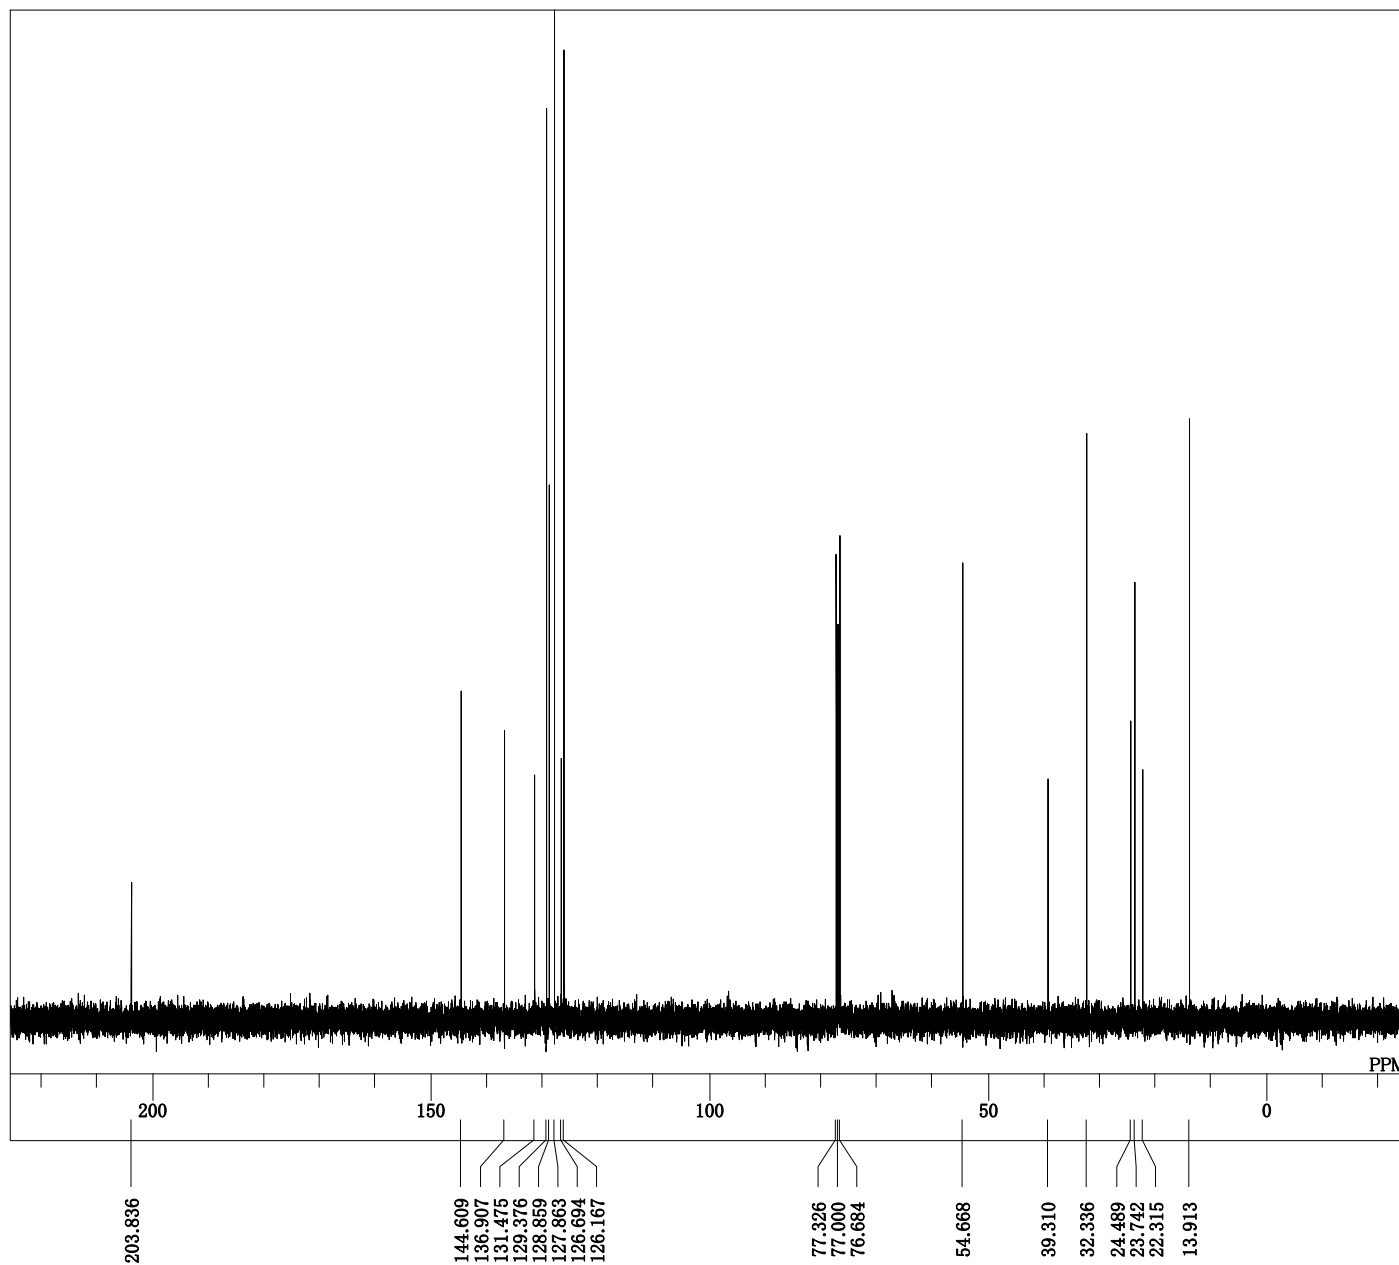

DFILE pro\_cyc.Me\_nPentyl\_Carbon.als  
 COMNT single pulse decoupled gated NOE  
 DATIM 2020-07-05 16:56:36  
 OBNUC 13C  
 EXMOD carbon.jxp  
 OBFRQ 99.55 MHz  
 OBSET 5.13 KHz  
 OBFIN 0.98 Hz  
 POINT 26214  
 FREQU 25000.00 Hz  
 SCANS 64  
 ACQTM 1.0486 sec  
 PD 2.0000 sec  
 PW1 3.59 usec  
 IRNUC 1H  
 CTEMP 20.6 c  
 SLVNT CDCL3  
 EXREF 77.00 ppm  
 BF 0.12 Hz  
 RGAIN 50

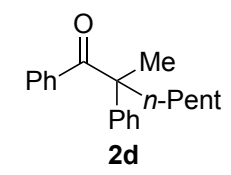

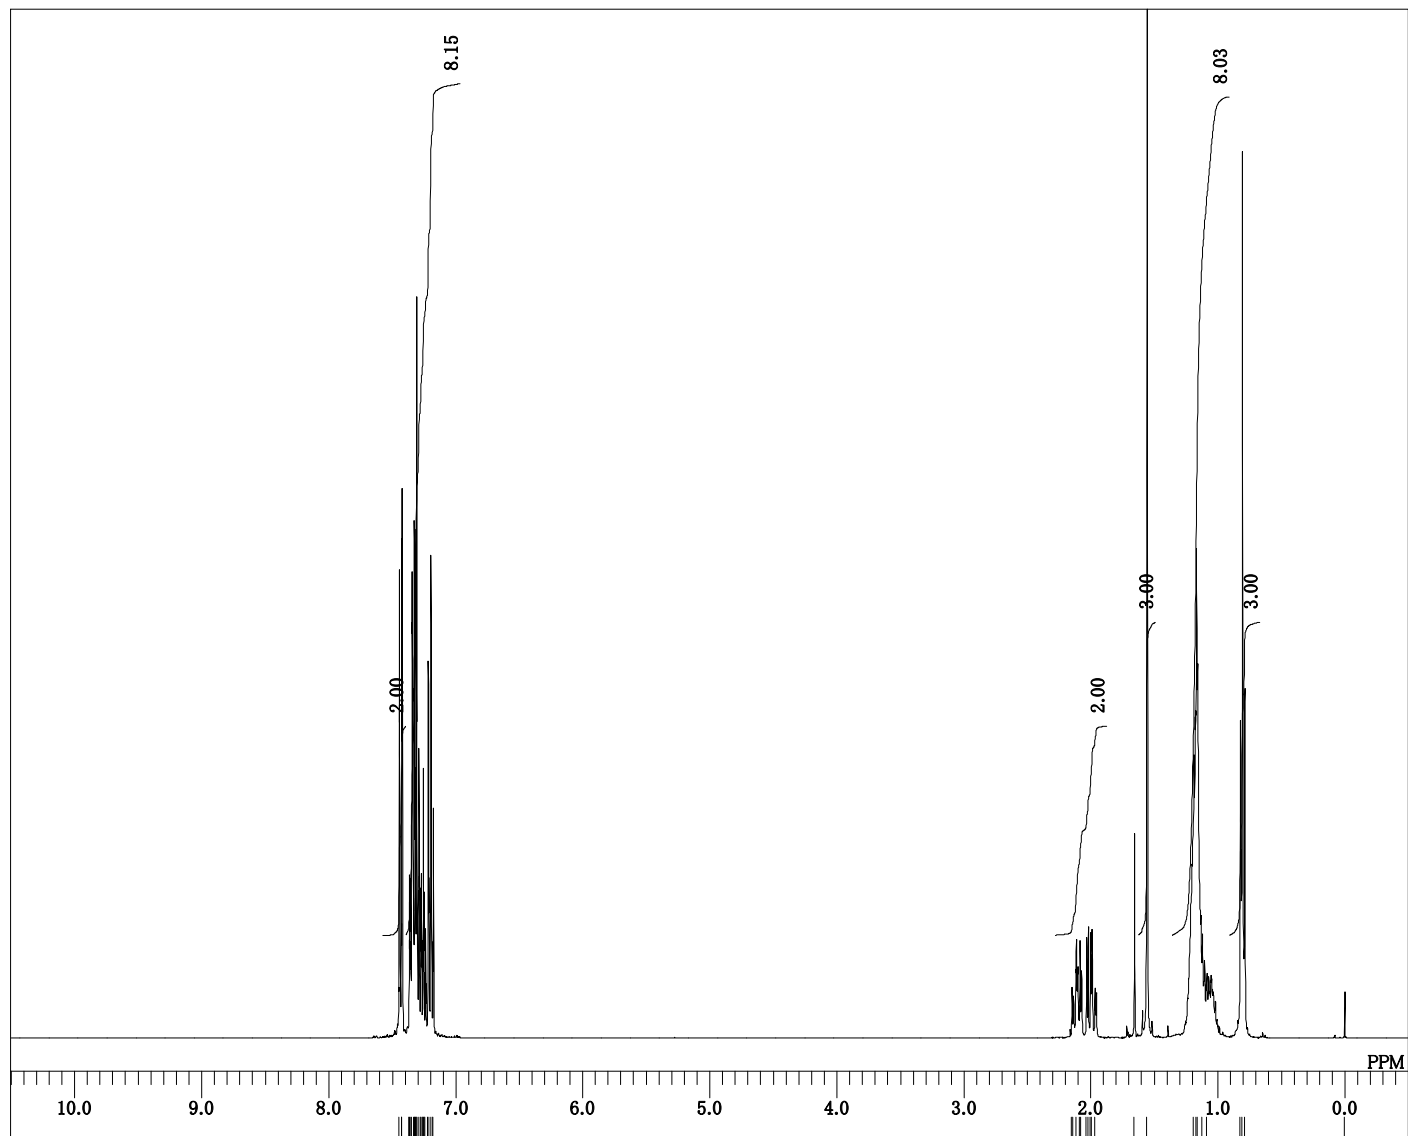

7.442  
7.424  
7.420  
7.363  
7.357  
7.354  
7.344  
7.327  
7.320  
7.316  
7.312  
7.307  
7.300  
7.290  
7.276  
7.273  
7.260  
7.254  
7.251  
7.242  
7.237  
7.216  
7.211  
7.195  
7.180  
7.176

2.148  
2.135  
2.114  
2.085  
2.073  
2.032  
2.020  
2.002  
1.990  
1.967  
1.656  
1.556  
1.188  
1.167  
1.159  
1.122  
1.085  
0.823  
0.806  
0.787  
0.000

DFILE pro\_cyc\_Me\_nHexyl\_Proton.als  
COMNT single\_pulse  
DATIM 2020-07-06 16:37:37  
OBNUC 1H  
EXMOD proton\_jxp  
OBFRQ 395.88 MHz  
OBSET 6.28 KHz  
OBFIN 0.87 Hz  
POINT 13107  
FREQU 5938.24 Hz  
SCANS 8  
ACQTM 2.2073 sec  
PD 5.0000 sec  
PW1 3.14 usec  
IRNUC 1H  
CTEMP 20.5 c  
SLVNT CDCL3  
EXREF 0.00 ppm  
BF 0.12 Hz  
RGAIN 20

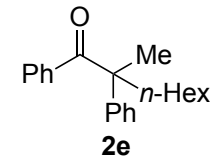

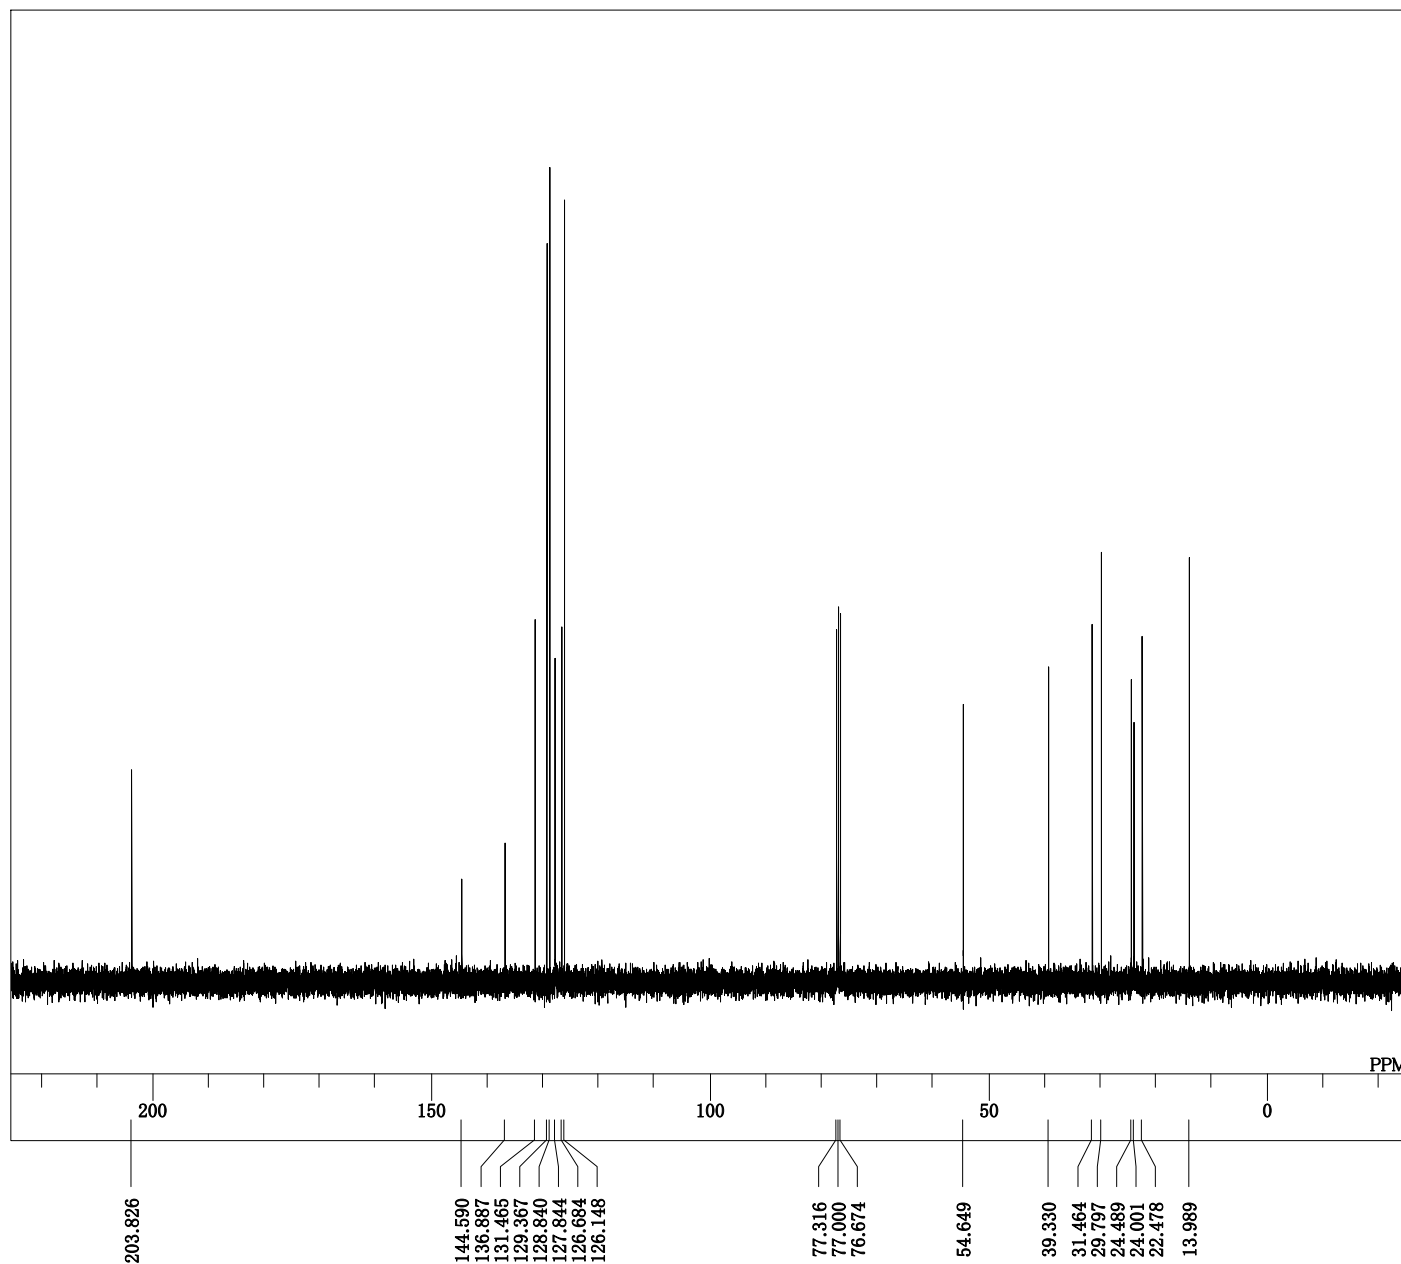

DFILE pro\_cyc\_Me\_nHexyl\_Carbon.als  
 COMNT single pulse decoupled gated NOE  
 DATIM 2020-07-06 16:38:50  
 OBNUC <sup>13</sup>C  
 EXMOD carbon.jxp  
 OBFRQ 99.55 MHz  
 OBSET 5.13 KHz  
 OBFIN 0.98 Hz  
 POINT 26214  
 FREQU 25000.00 Hz  
 SCANS 33  
 ACQTM 1.0486 sec  
 PD 2.0000 sec  
 PW1 3.59 usec  
 IRNUC <sup>1</sup>H  
 CTEMP 20.2 c  
 SLVNT CDCL3  
 EXREF 77.00 ppm  
 BF 0.12 Hz  
 RGAIN 50

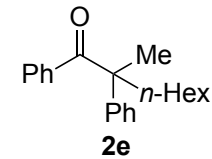

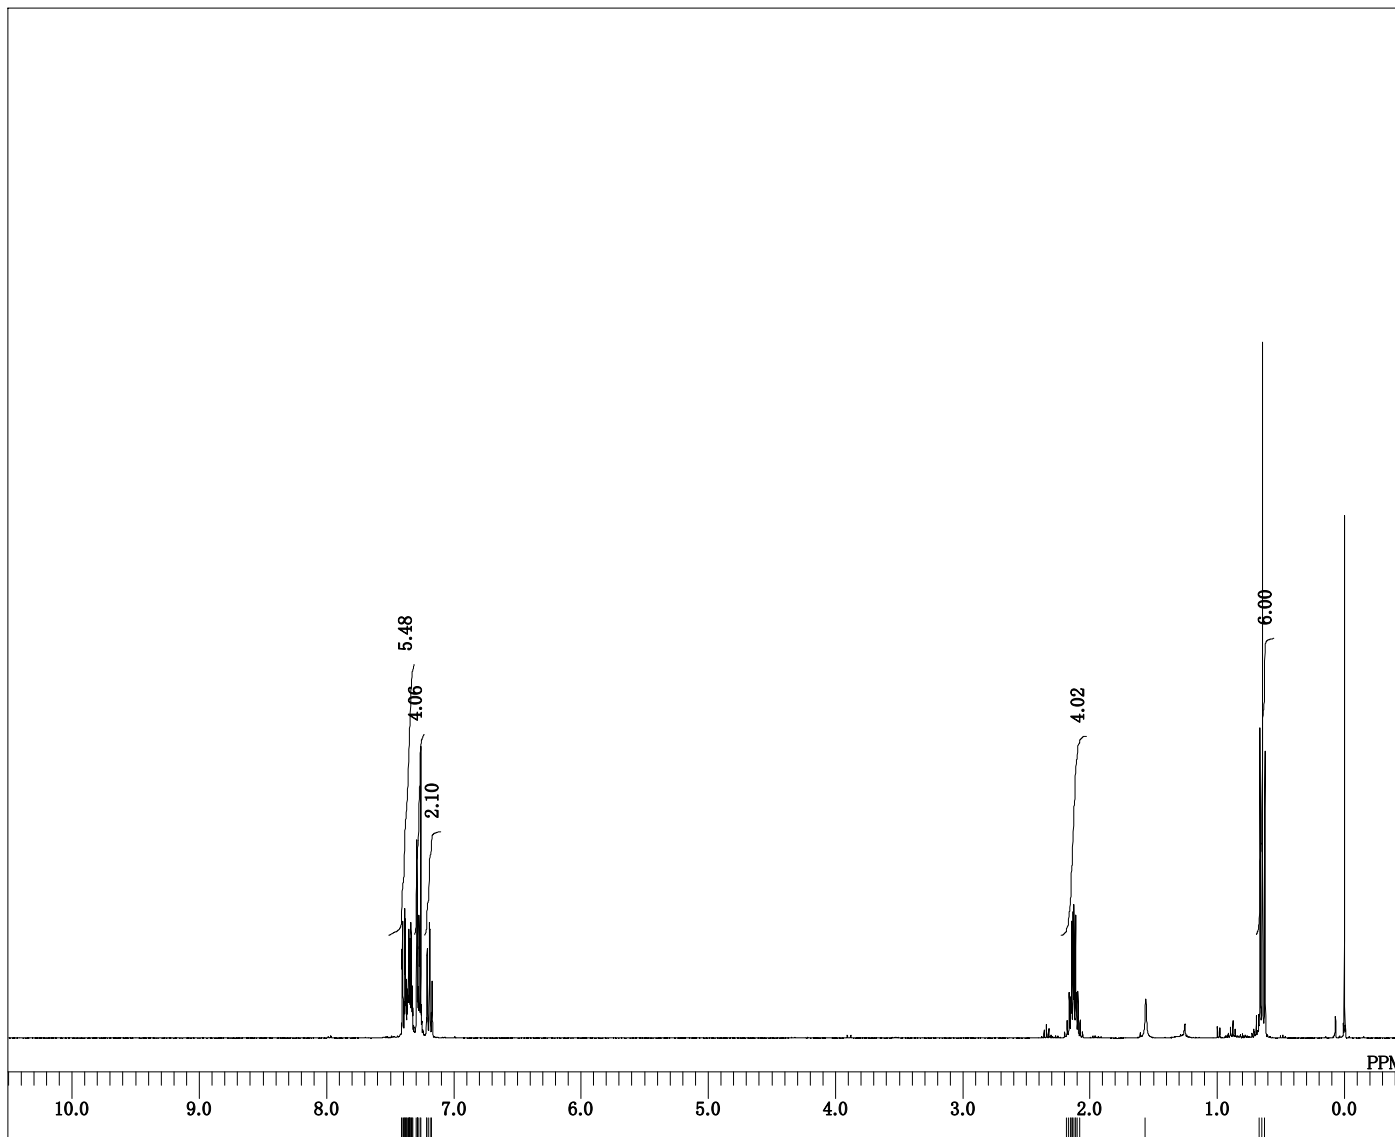

DFILE pro\_cyc\_Et\_Et\_Proton.als  
 COMNT single\_pulse  
 DATIM 2020-04-02 09:15:34  
 OBNUC 1H  
 EXMOD proton.jxp  
 OBFRQ 395.88 MHz  
 OBSET 6.28 KHz  
 OBFIN 0.87 Hz  
 POINT 13107  
 FREQU 5938.24 Hz  
 SCANS 8  
 ACQTM 2.2073 sec  
 PD 5.0000 sec  
 PW1 3.14 usec  
 IRNUC 1H  
 CTEMP 20.1 c  
 SLVNT CDCL3  
 EXREF 0.00 ppm  
 BF 0.12 Hz  
 RGAIN 40

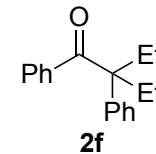

7.407  
 7.403  
 7.391  
 7.385  
 7.382  
 7.375  
 7.368  
 7.364  
 7.355  
 7.353  
 7.346  
 7.341  
 7.338  
 7.331  
 7.328  
 7.324  
 7.316  
 7.290  
 7.283  
 7.279  
 7.274  
 7.261  
 7.256  
 7.210  
 7.206  
 7.192  
 7.176  
 7.171

2.180  
 2.163  
 2.150  
 2.145  
 2.132  
 2.125  
 2.113  
 2.107  
 2.094  
 2.077  
 1.561

0.663  
 0.644  
 0.625

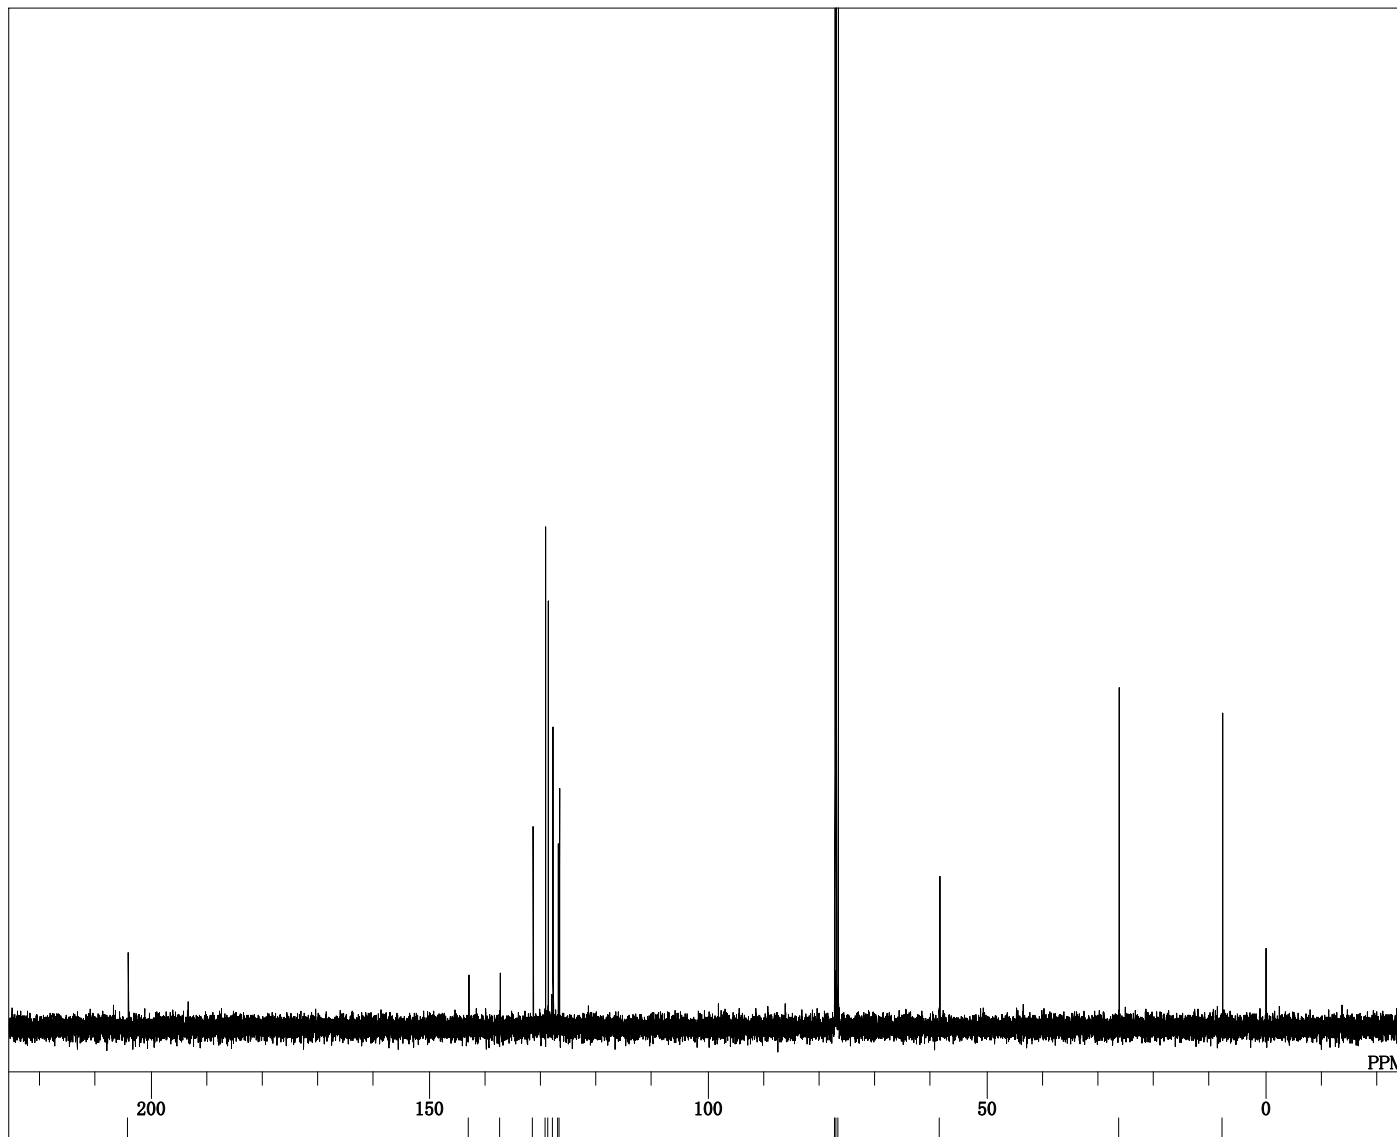

DFILE pro\_cyc.Et\_Et\_Carbon.als  
 COMNT single pulse decoupled gated NOE  
 DATIM 2020-04-02 09:16:46  
 OBNUC 13C  
 EXMOD carbon.jxp  
 OBFRQ 99.55 MHz  
 OBSET 5.13 KHz  
 OBFIN 0.98 Hz  
 POINT 26214  
 FREQU 25000.00 Hz  
 SCANS 928  
 ACQTM 1.0486 sec  
 PD 2.0000 sec  
 PW1 3.59 usec  
 IRNUC 1H  
 CTEMP 19.6 c  
 SLVNT CDCL3  
 EXREF 77.00 ppm  
 BF 0.12 Hz  
 RGAIN 50

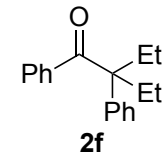

204.104

142.990  
137.357  
131.446  
129.261  
128.725  
127.863  
126.972  
126.770

77.316  
77.000  
76.674

58.529

26.300

7.772

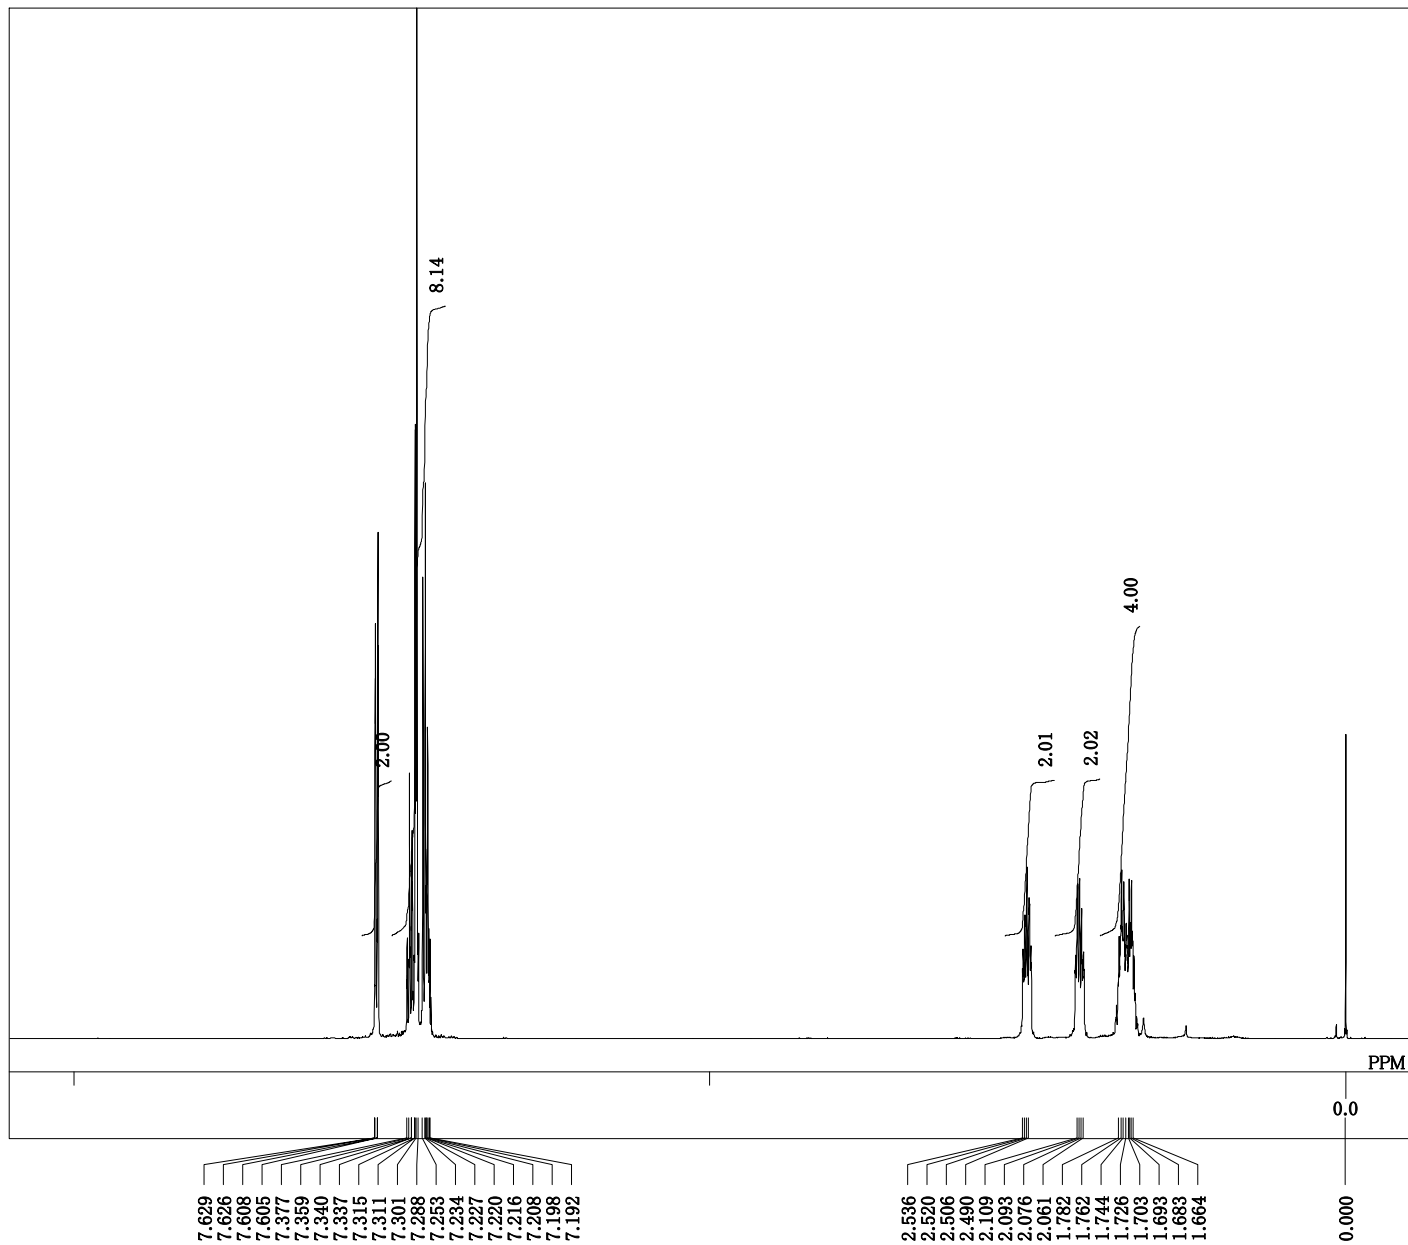

DFILE pro\_cyc\_cyc\_pentylProton.als  
 COMNT single\_pulse  
 DATIM 2020-04-02 10:15:58  
 OBNUC 1H  
 EXMOD proton.jxp  
 OBFRQ 395.88 MHz  
 OBSET 6.28 KHz  
 OBFIN 0.87 Hz  
 POINT 13107  
 FREQU 5938.24 Hz  
 SCANS 8  
 ACQTM 2.2073 sec  
 PD 5.0000 sec  
 PW1 3.14 usec  
 IRNUC 1H  
 CTEMP 20.4 c  
 SLVNT CDCL3  
 EXREF 0.00 ppm  
 BF 0.12 Hz  
 RGAIN 28

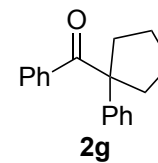



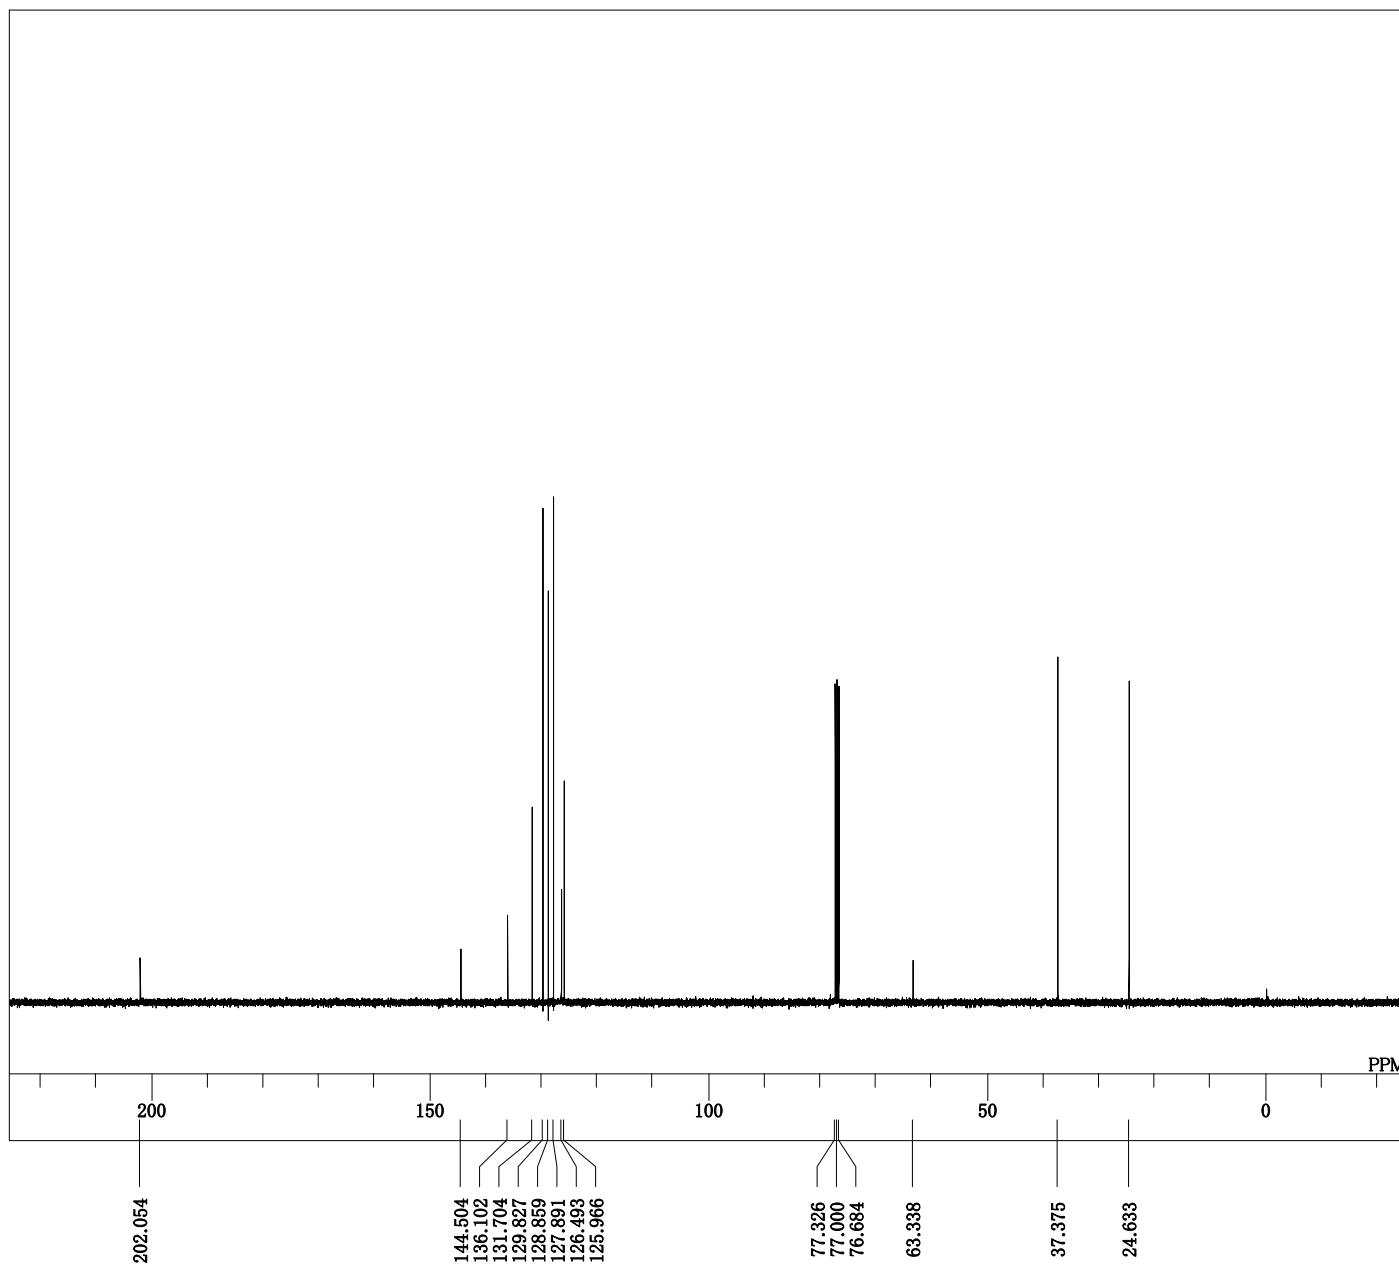

DFILE pro\_cyc\_cyc.pentyl\_Carbon.als  
 COMNT single pulse decoupled gated NOE  
 DATIM 2020-04-02 10:17:11  
 OBNUC 13C  
 EXMOD carbon.jxp  
 OBFRQ 99.55 MHz  
 OBSET 5.13 KHz  
 OBFIN 0.98 Hz  
 POINT 26214  
 FREQU 25000.00 Hz  
 SCANS 452  
 ACQTM 1.0486 sec  
 PD 2.0000 sec  
 PW1 3.59 usec  
 IRNUC 1H  
 CTEMP 20.3 c  
 SLVNT CDCL3  
 EXREF 77.00 ppm  
 BF 0.12 Hz  
 RGAIN 50

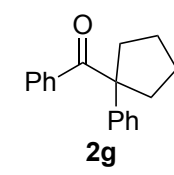

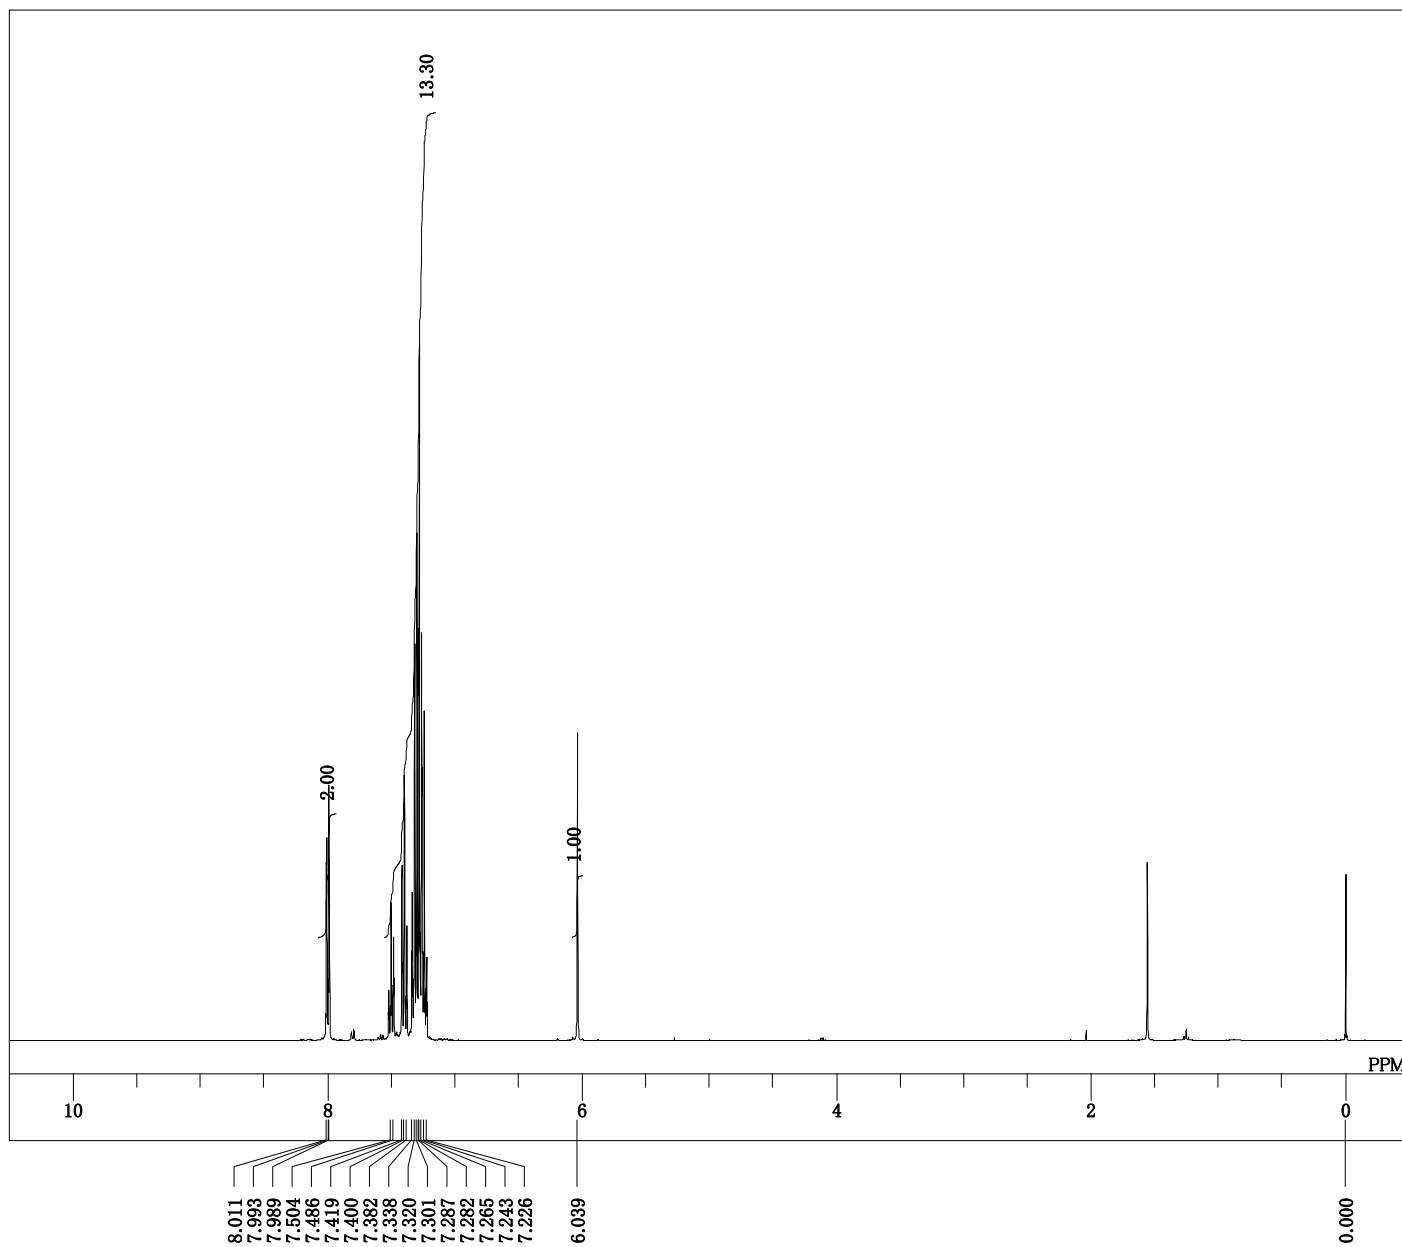

DFILE pro\_cyc\_H\_Ph\_Proton.als  
 COMNT single\_pulse  
 DATIM 2020-06-10 15:59:34  
 OBNUC 1H  
 EXMOD proton.jxp  
 OBFRQ 395.88 MHz  
 OBSET 6.28 KHz  
 OBFIN 0.87 Hz  
 POINT 13107  
 FREQU 5938.24 Hz  
 SCANS 8  
 ACQTM 2.2073 sec  
 PD 5.0000 sec  
 PW1 3.14 usec  
 IRNUC 1H  
 CTEMP 20.5 c  
 SLVNT CDCL3  
 EXREF 0.00 ppm  
 BF 0.12 Hz  
 RGAIN 32

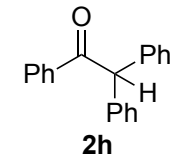

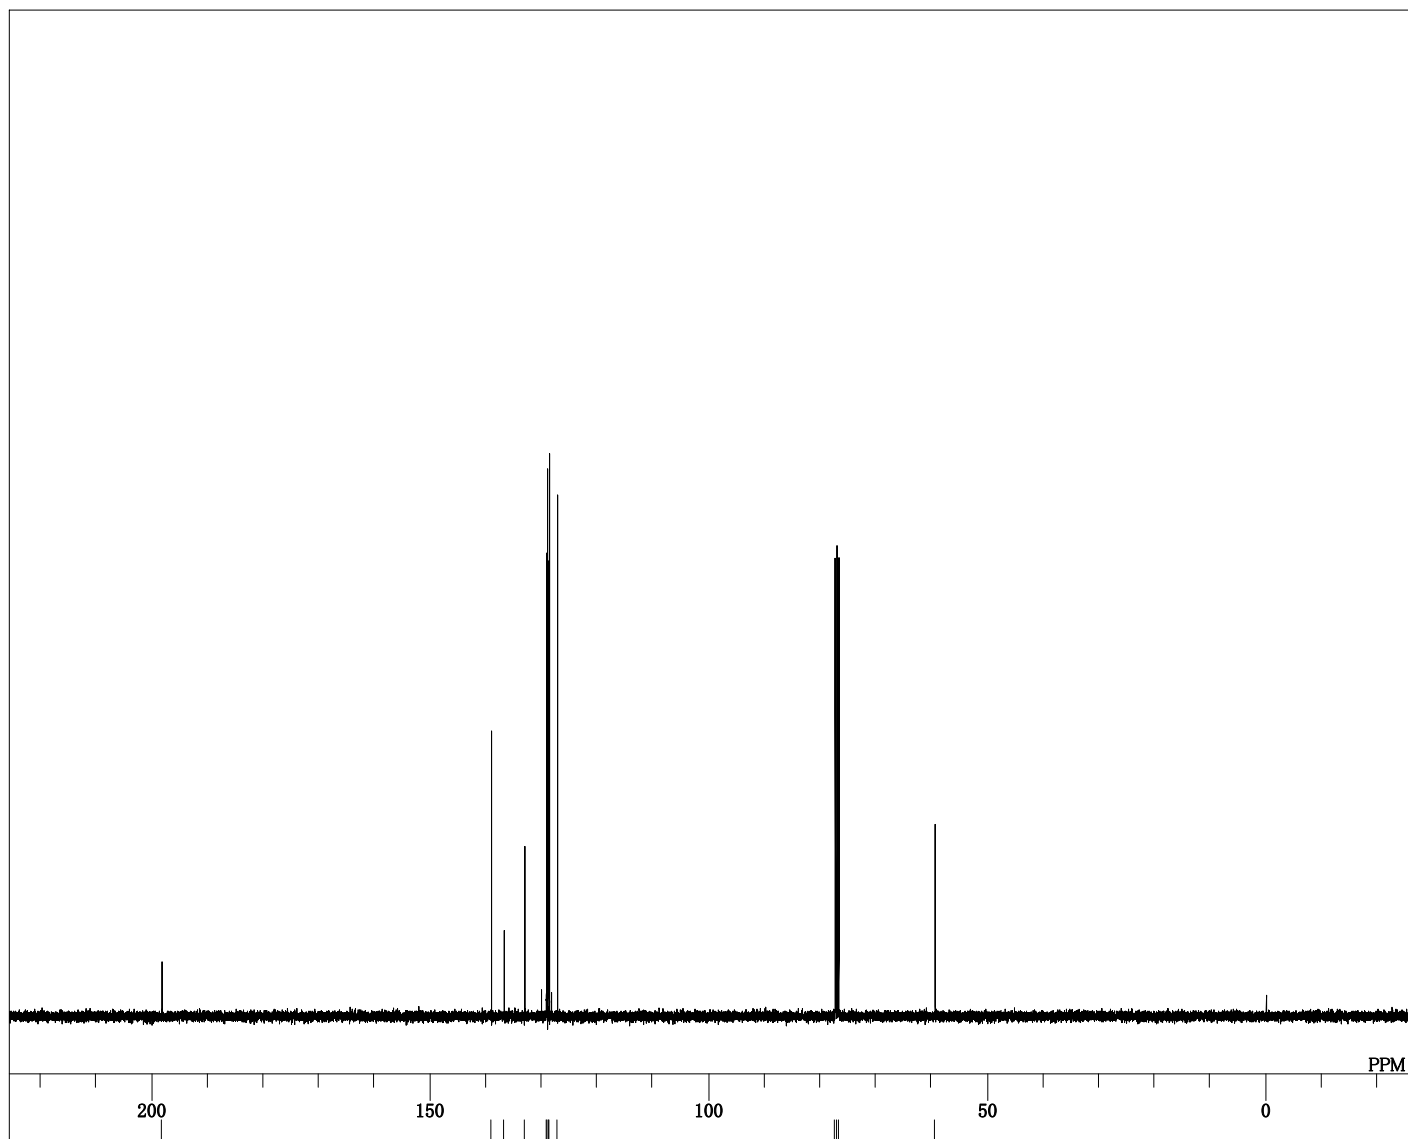

DFILE pro\_cyc\_H\_Ph\_Carbon.als  
 COMNT single pulse decoupled gated NOE  
 DATIM 2020-06-10 16:00:46  
 OBNUC 13C  
 EXMOD carbon.jxp  
 OBFRQ 99.55 MHz  
 OBSET 5.13 KHz  
 OBFIN 0.98 Hz  
 POINT 26214  
 FREQU 25000.00 Hz  
 SCANS 426  
 ACQTM 1.0486 sec  
 PD 2.0000 sec  
 PW1 3.59 usec  
 IRNUC 1H  
 CTEMP 20.0 c  
 SLVNT CDCL3  
 EXREF 77.00 ppm  
 BF 0.12 Hz  
 RGAIN 50

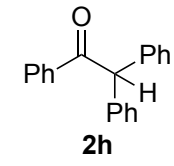

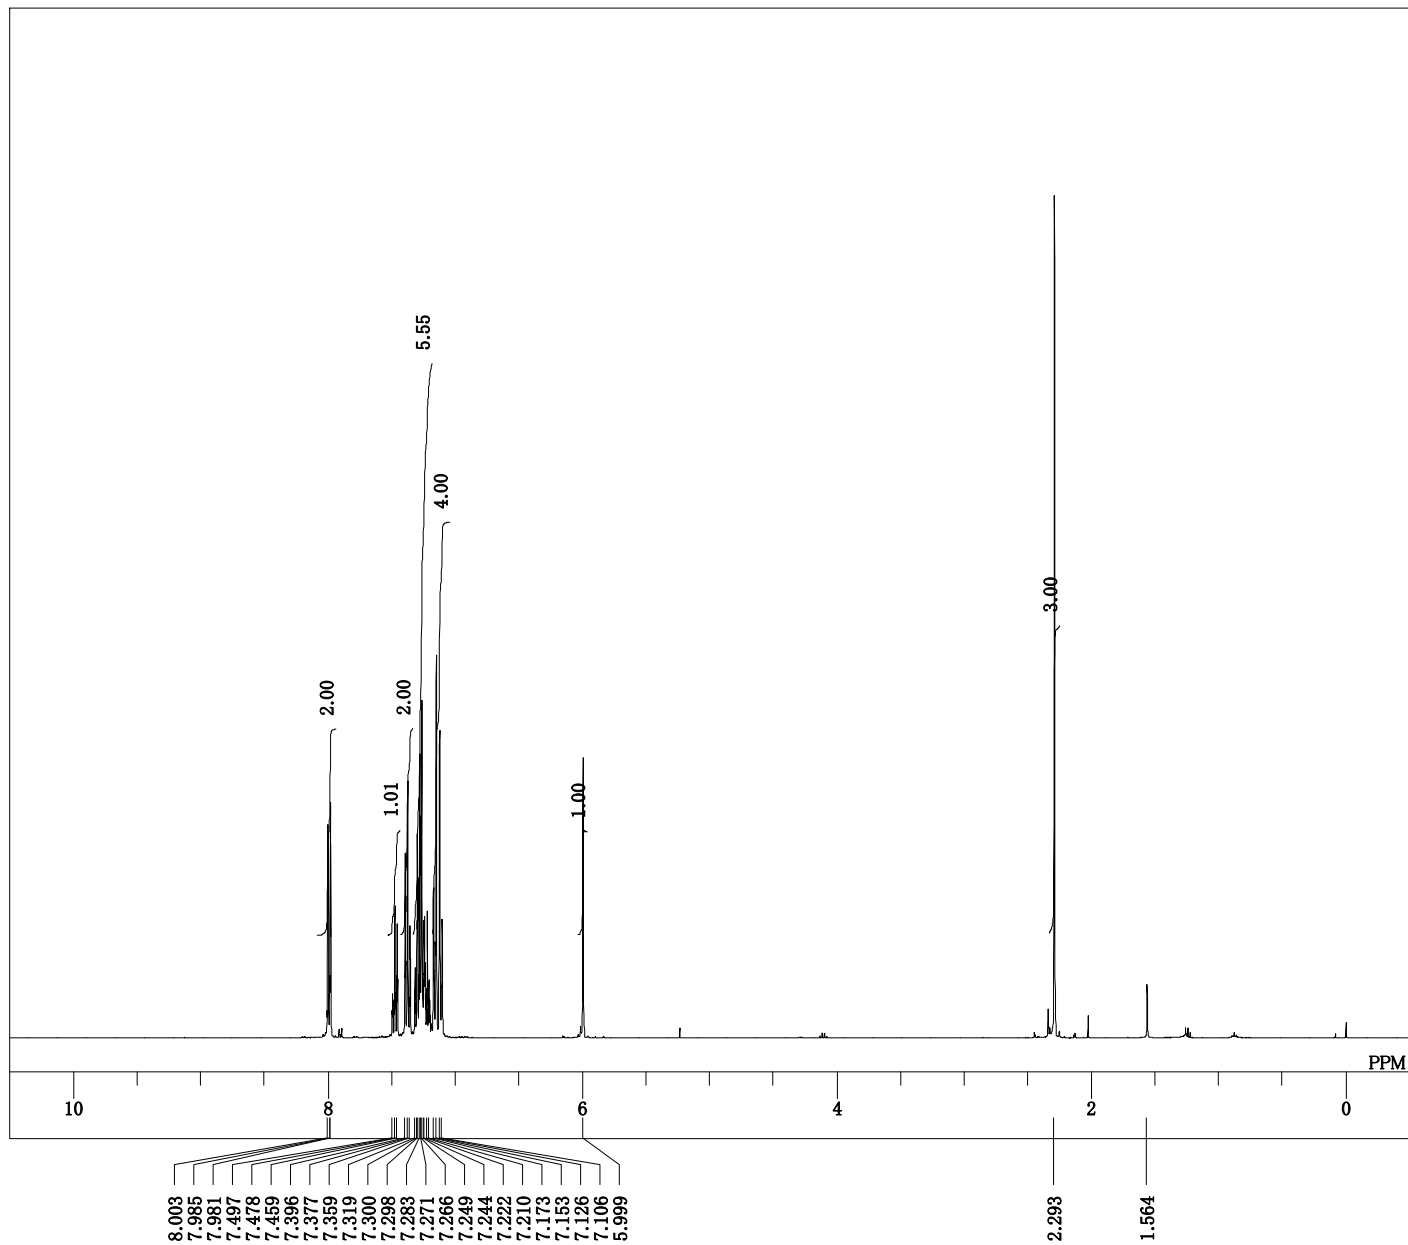

DFILE pro\_cyc\_HpMe\_Proton.als  
 COMNT single\_pulse  
 DATIM 2020-07-05 17:05:02  
 OBNUC 1H  
 EXMOD proton.jxp  
 OBFRQ 395.88 MHz  
 OBSET 6.28 KHz  
 OBFIN 0.87 Hz  
 POINT 13107  
 FREQU 5938.24 Hz  
 SCANS 8  
 ACQTM 2.2073 sec  
 PD 5.0000 sec  
 PW1 3.14 usec  
 IRNUC 1H  
 CTEMP 20.1 c  
 SLVNT CDCL3  
 EXREF 0.00 ppm  
 BF 0.12 Hz  
 RGAIN 24

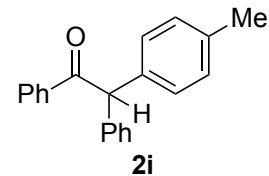

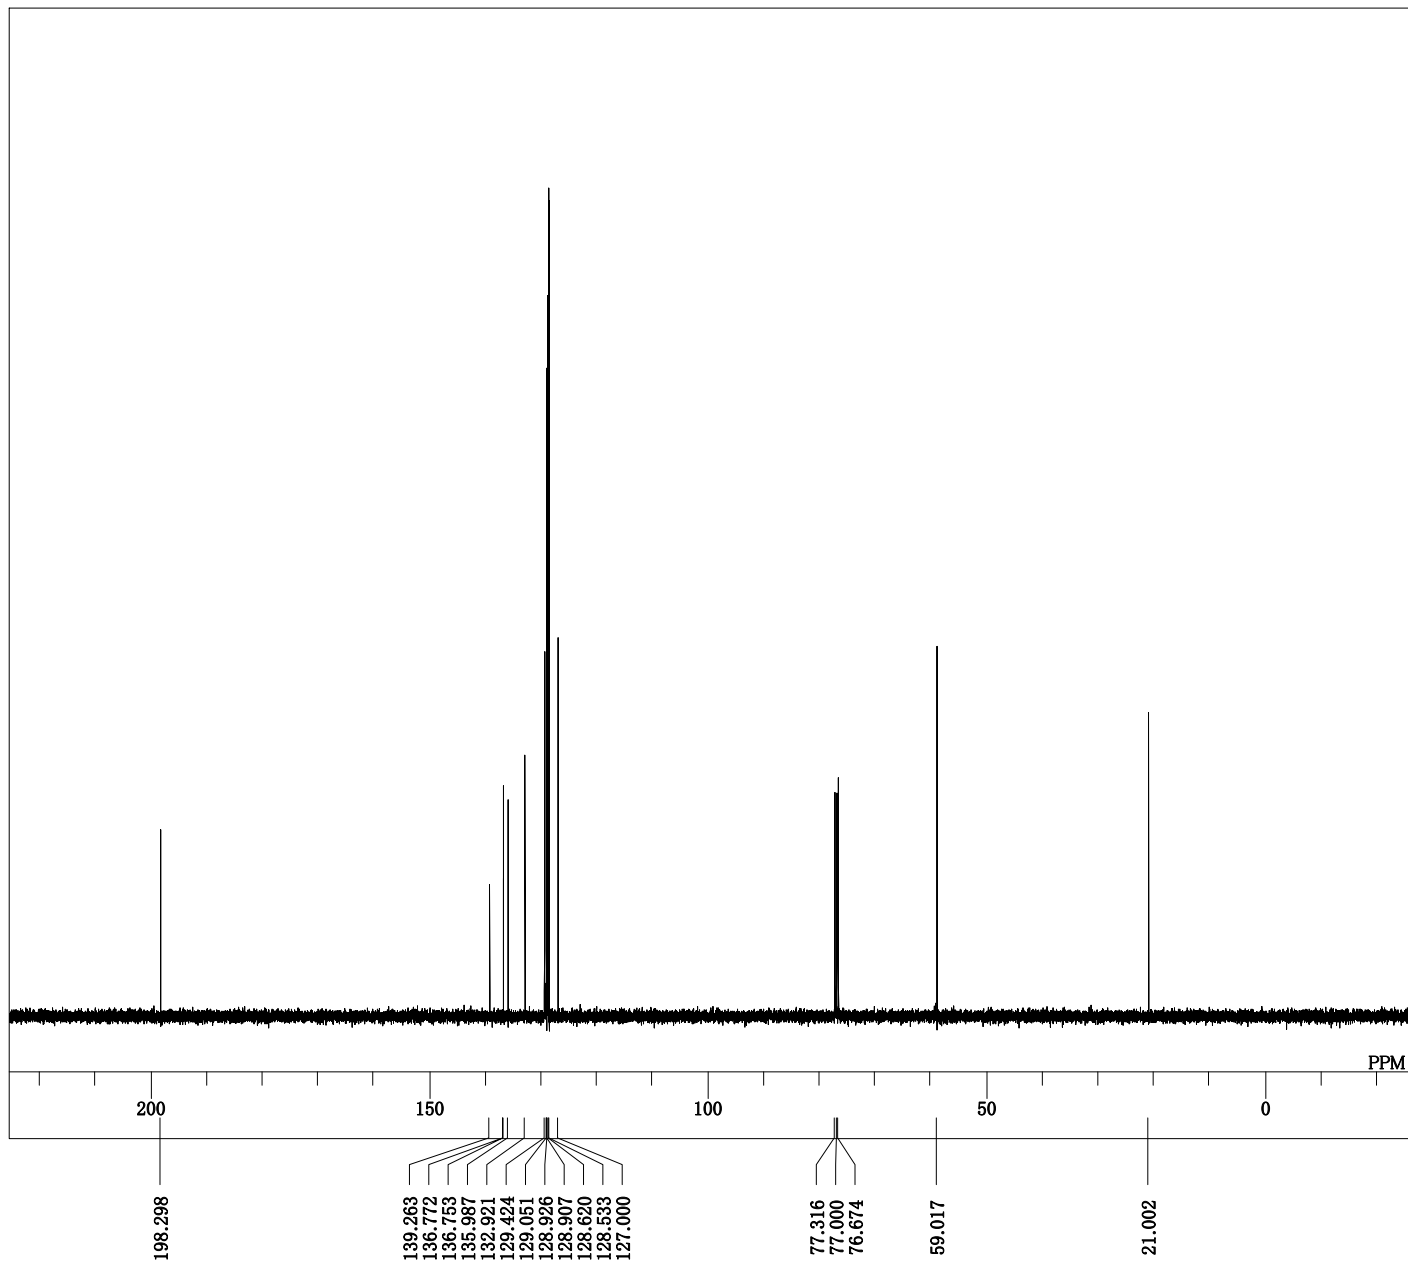

DFILE pro\_cyc\_H\_pMe\_Carbon.als  
 COMNT single pulse decoupled gated NOE  
 DATIM 2020-07-05 17:06:15  
 OBNUC 13C  
 EXMOD carbon.jxp  
 OBFRQ 99.55 MHz  
 OBSET 5.13 KHz  
 OBFIN 0.98 Hz  
 POINT 26214  
 FREQU 25000.00 Hz  
 SCANS 149  
 ACQTM 1.0486 sec  
 PD 2.0000 sec  
 PW1 3.59 usec  
 IRNUC 1H  
 CTEMP 20.5 c  
 SLVNT CDCL3  
 EXREF 77.00 ppm  
 BF 0.12 Hz  
 RGAIN 50



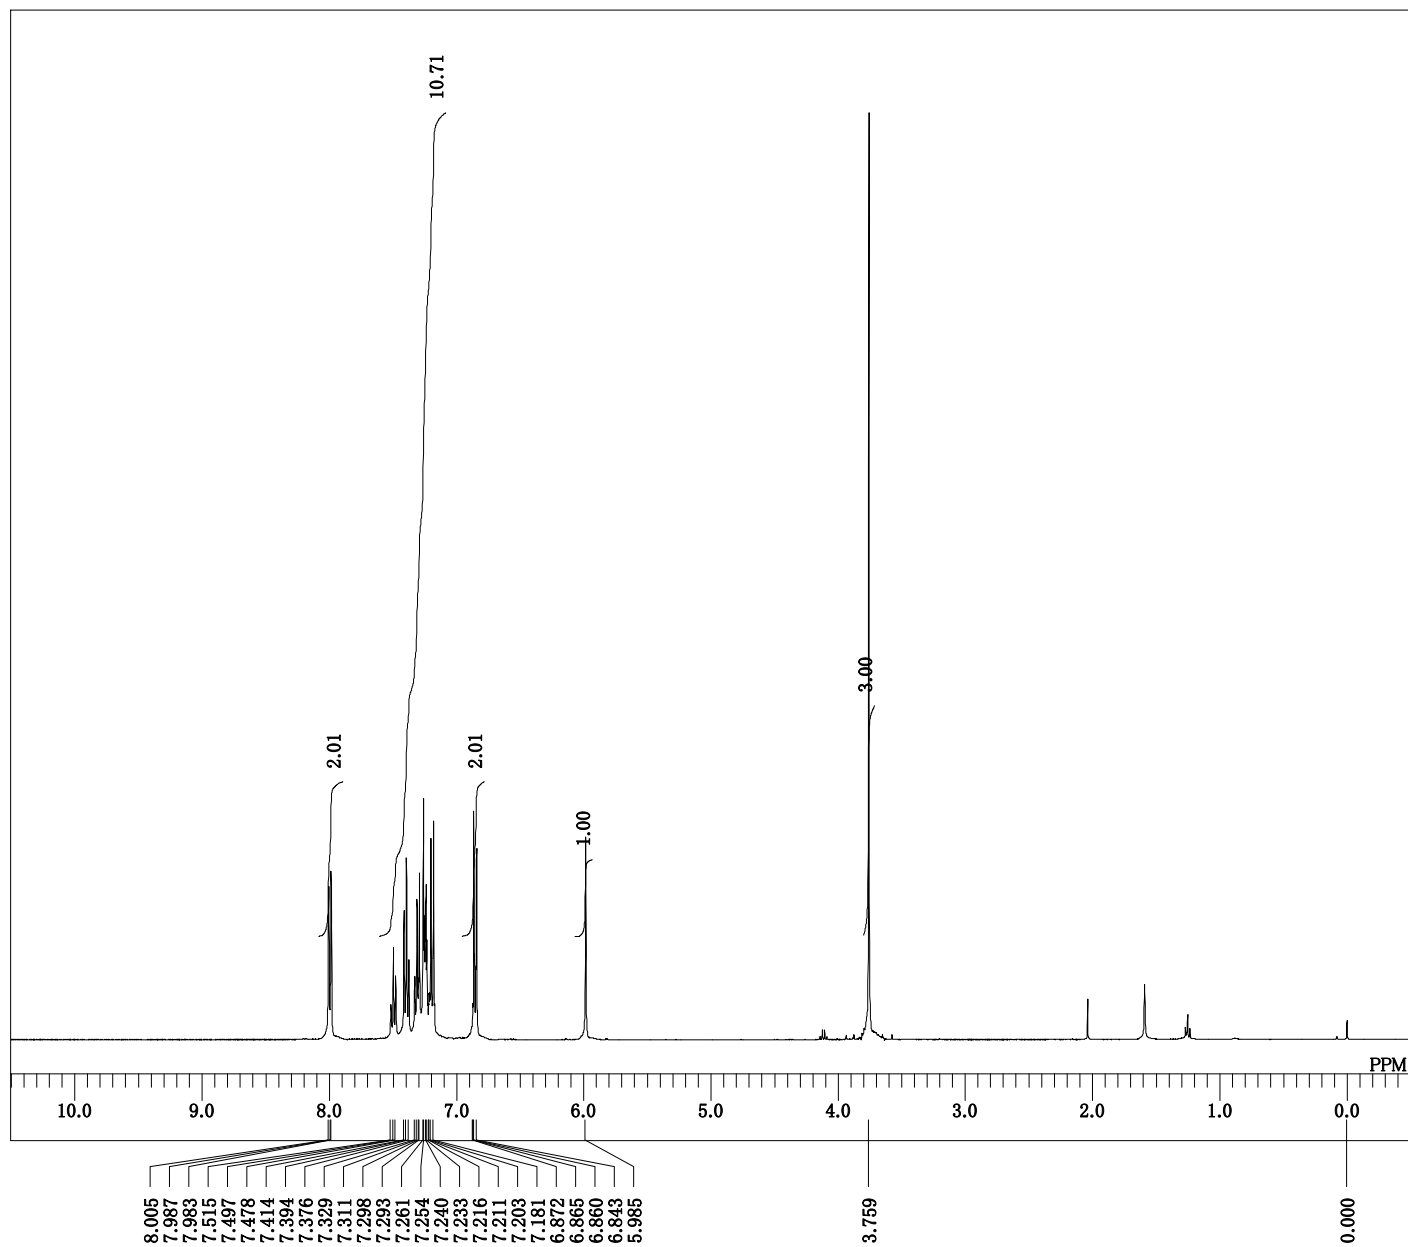

DFILE pro\_cyc\_HpOMe\_Proton.als  
 COMNT auto  
 DATIM Sat Sep 01 12:39:05 2018  
 OBNUC 1H  
 EXMOD NON  
 OBFRQ 399.65 MHz  
 OBSET 124.00 KHz  
 OBFIN 10500.00 Hz  
 POINT 16384  
 FREQU 7992.01 Hz  
 SCANS 8  
 ACQTM 2.0500 sec  
 PD 2.0000 sec  
 PW1 6.60 usec  
 IRNUC 1H  
 CTEMP 24.4 c  
 SLVNT CDCL3  
 EXREF 0.00 ppm  
 BF 0.12 Hz  
 RGAIN 13

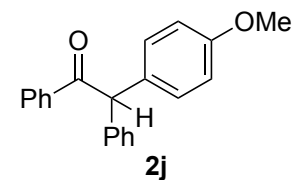

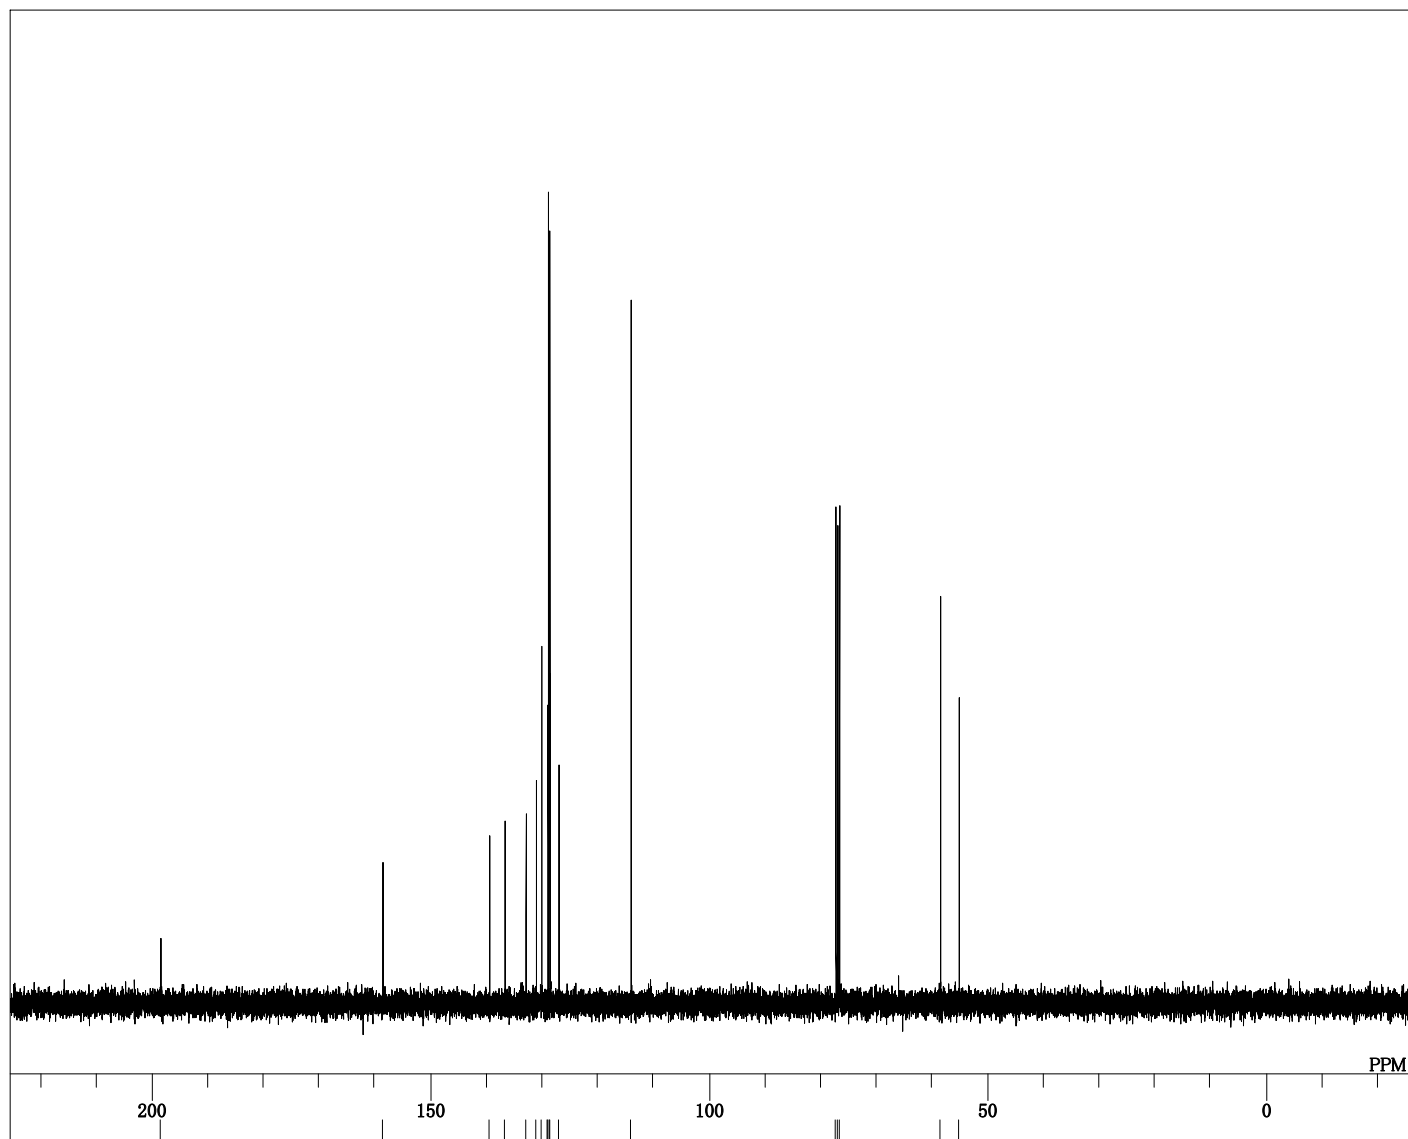

```

DFILE      pro_cyc_HpOMe_Carbon.als
COMNT      single pulse decoupled gated NOE
DATIM      2020-07-06 16:57:41
OBNUC      13C
EXMOD      carbon.jxp
OBFRQ      99.55 MHz
OBSET      5.13 KHz
OBFIN      0.98 Hz
POINT      26214
FREQU      25000.00 Hz
SCANS      90
ACQTM      1.0486 sec
PD         2.0000 sec
PW1        3.59 usec
IRNUC      1H
CTEMP      20.7 c
SLVNT      CDCL3
EXREF      77.00 ppm
BF         0.12 Hz
RGAIN      50
  
```

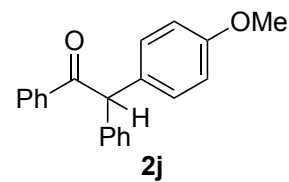

198.442

158.616

139.426

136.763

132.950

131.072

130.133

129.003

128.917

128.648

128.562

127.020

114.115

77.326

77.000

76.684

58.548

55.176

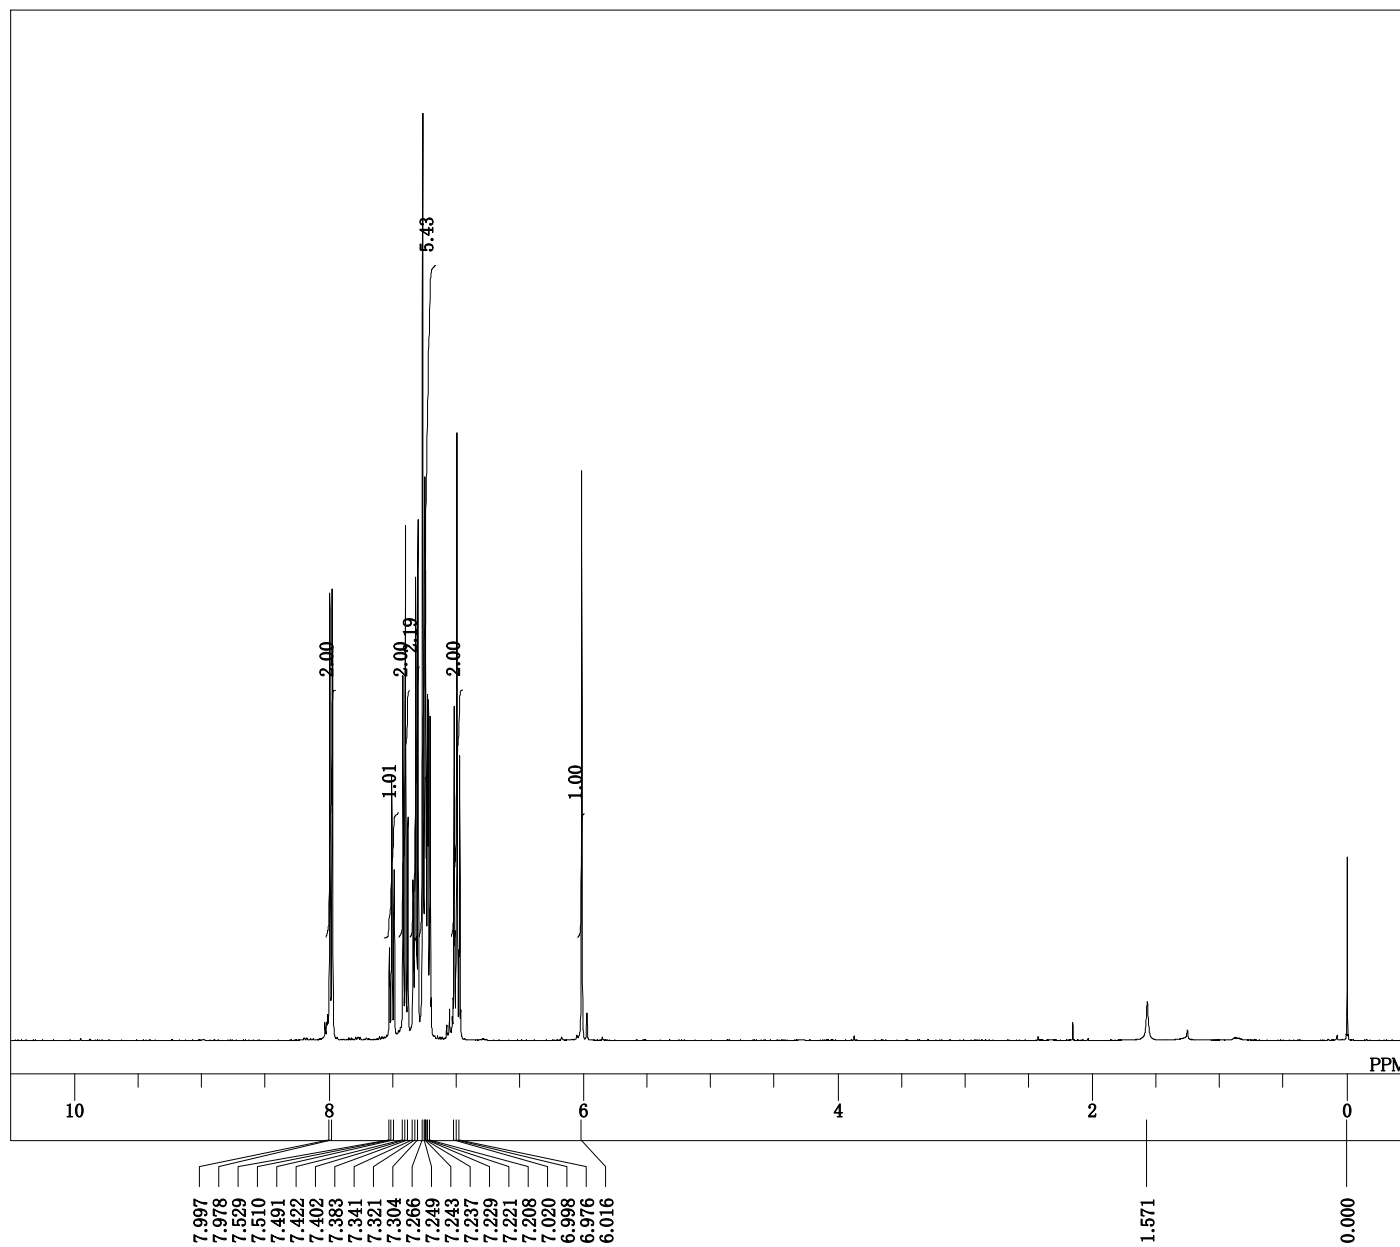

DFILE pro\_diol\_H\_pF\_fr2\_Proton.als  
 COMNT single\_pulse  
 DATIM 2020-03-28 11:45:02  
 OBNUC 1H  
 EXMOD proton.jxp  
 OBFRQ 395.88 MHz  
 OBSET 6.28 KHz  
 OBFIN 0.87 Hz  
 POINT 13107  
 FREQU 5938.24 Hz  
 SCANS 8  
 ACQTM 2.2073 sec  
 PD 5.0000 sec  
 PW1 3.14 usec  
 IRNUC 1H  
 CTEMP 20.4 c  
 SLVNT CDCL3  
 EXREF 0.00 ppm  
 BF 0.12 Hz  
 RGAIN 28

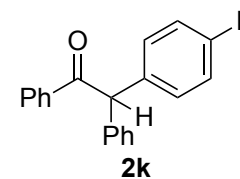



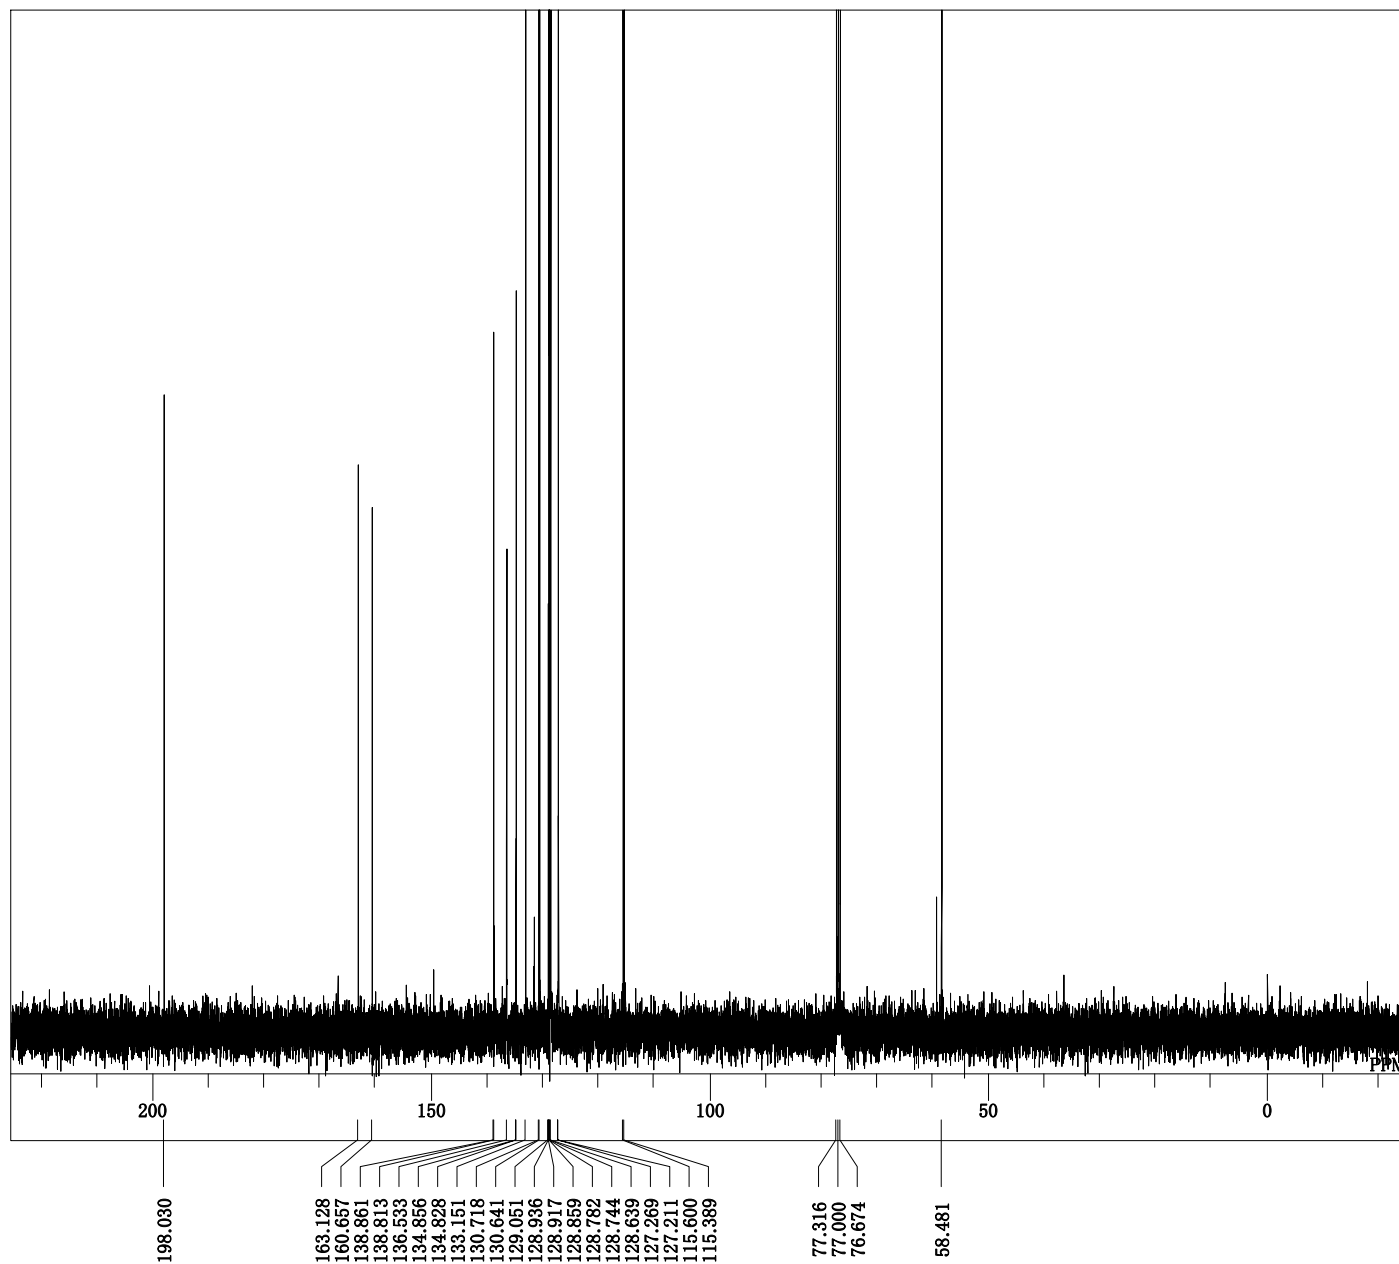

DFILE pro\_diol\_H\_pF\_fr2\_Carbon.als  
 COMNT single pulse decoupled gated NOE  
 DATIM 2020-03-28 11:46:14  
 OBNUC 13C  
 EXMOD carbon.jxp  
 OBFRQ 99.55 MHz  
 OBSET 5.13 KHz  
 OBFIN 0.98 Hz  
 POINT 26214  
 FREQU 25000.00 Hz  
 SCANS 1024  
 ACQTM 1.0486 sec  
 PD 2.0000 sec  
 PW1 3.59 usec  
 IRNUC 1H  
 CTEMP 20.5 c  
 SLVNT CDCL3  
 EXREF 77.00 ppm  
 BF 0.12 Hz  
 RGAIN 50

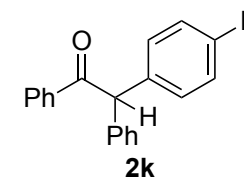

DFILE pro\_cyc\_H\_pF\_Fluorine.als  
COMNT single\_pulse  
DATIM 2022-07-04 13:48:27  
OBNUC 19F  
EXMOD single\_pulse.ixp  
OBFRQ 372.50 MHz  
OBSET 3.36 KHz  
OBFIN 6.86 Hz  
POINT 26214  
FREQU 149253.73 Hz  
SCANS 8  
ACQTM 0.1756 sec  
PD 5.0000 sec  
PW1 3.98 usec  
IRNUC 19F  
CTEMP 20.7 c  
SLVNT CDCL3  
EXREF -163.00 ppm  
BF 0.12 Hz  
RGAIN 42

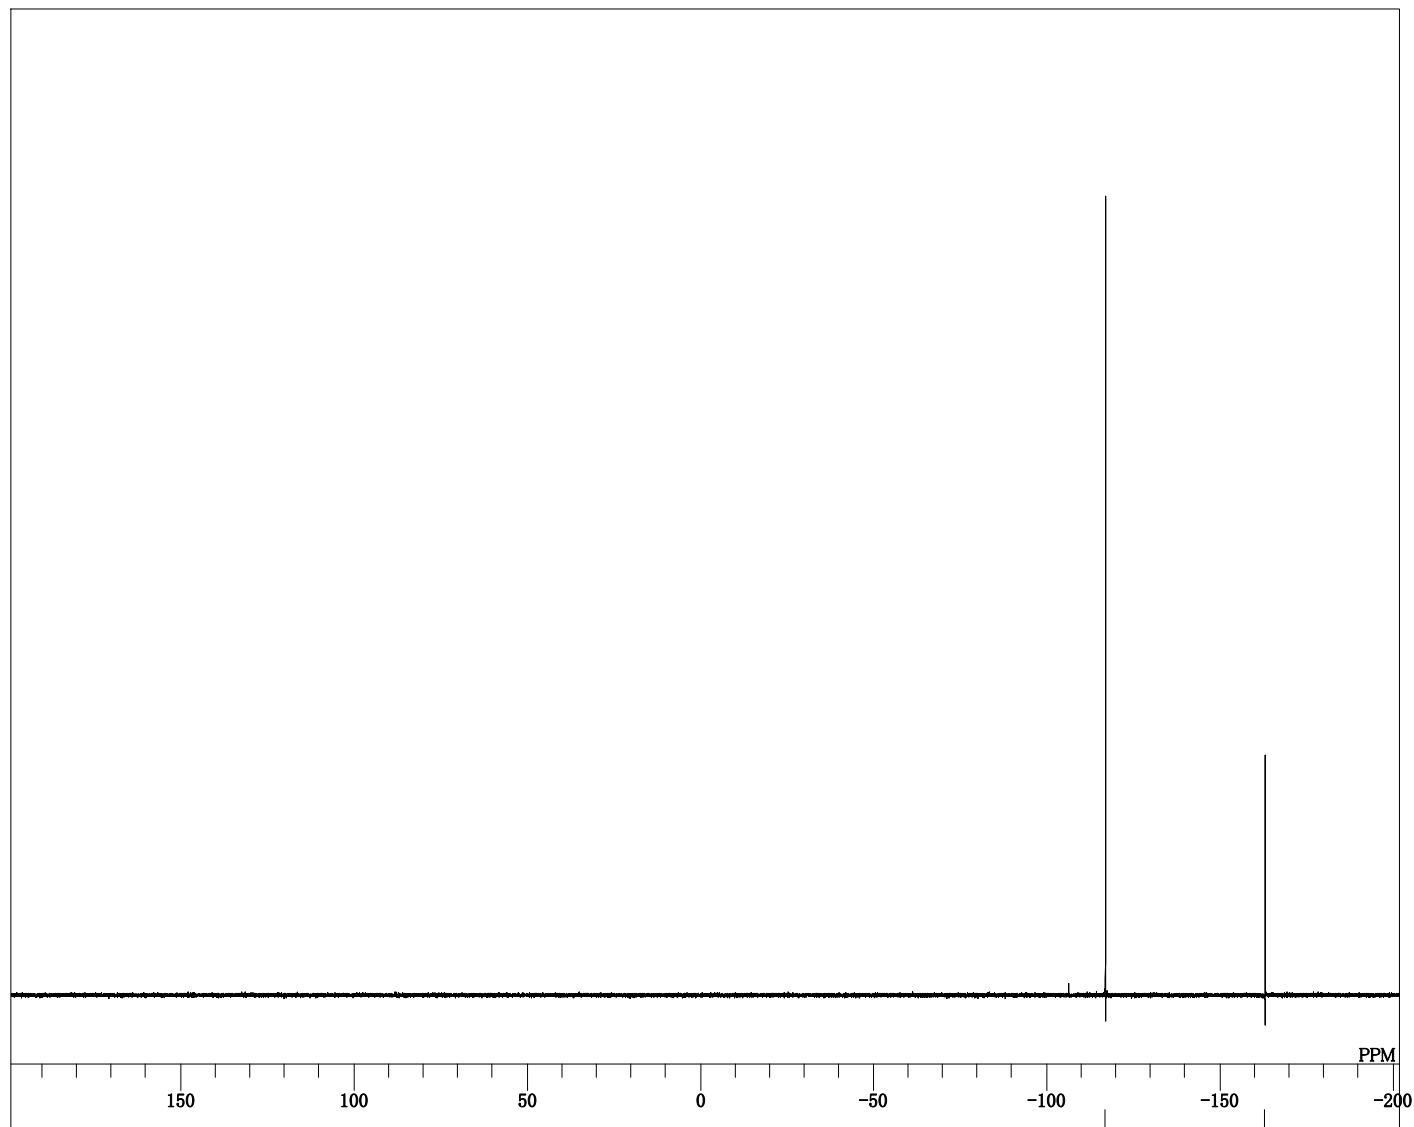

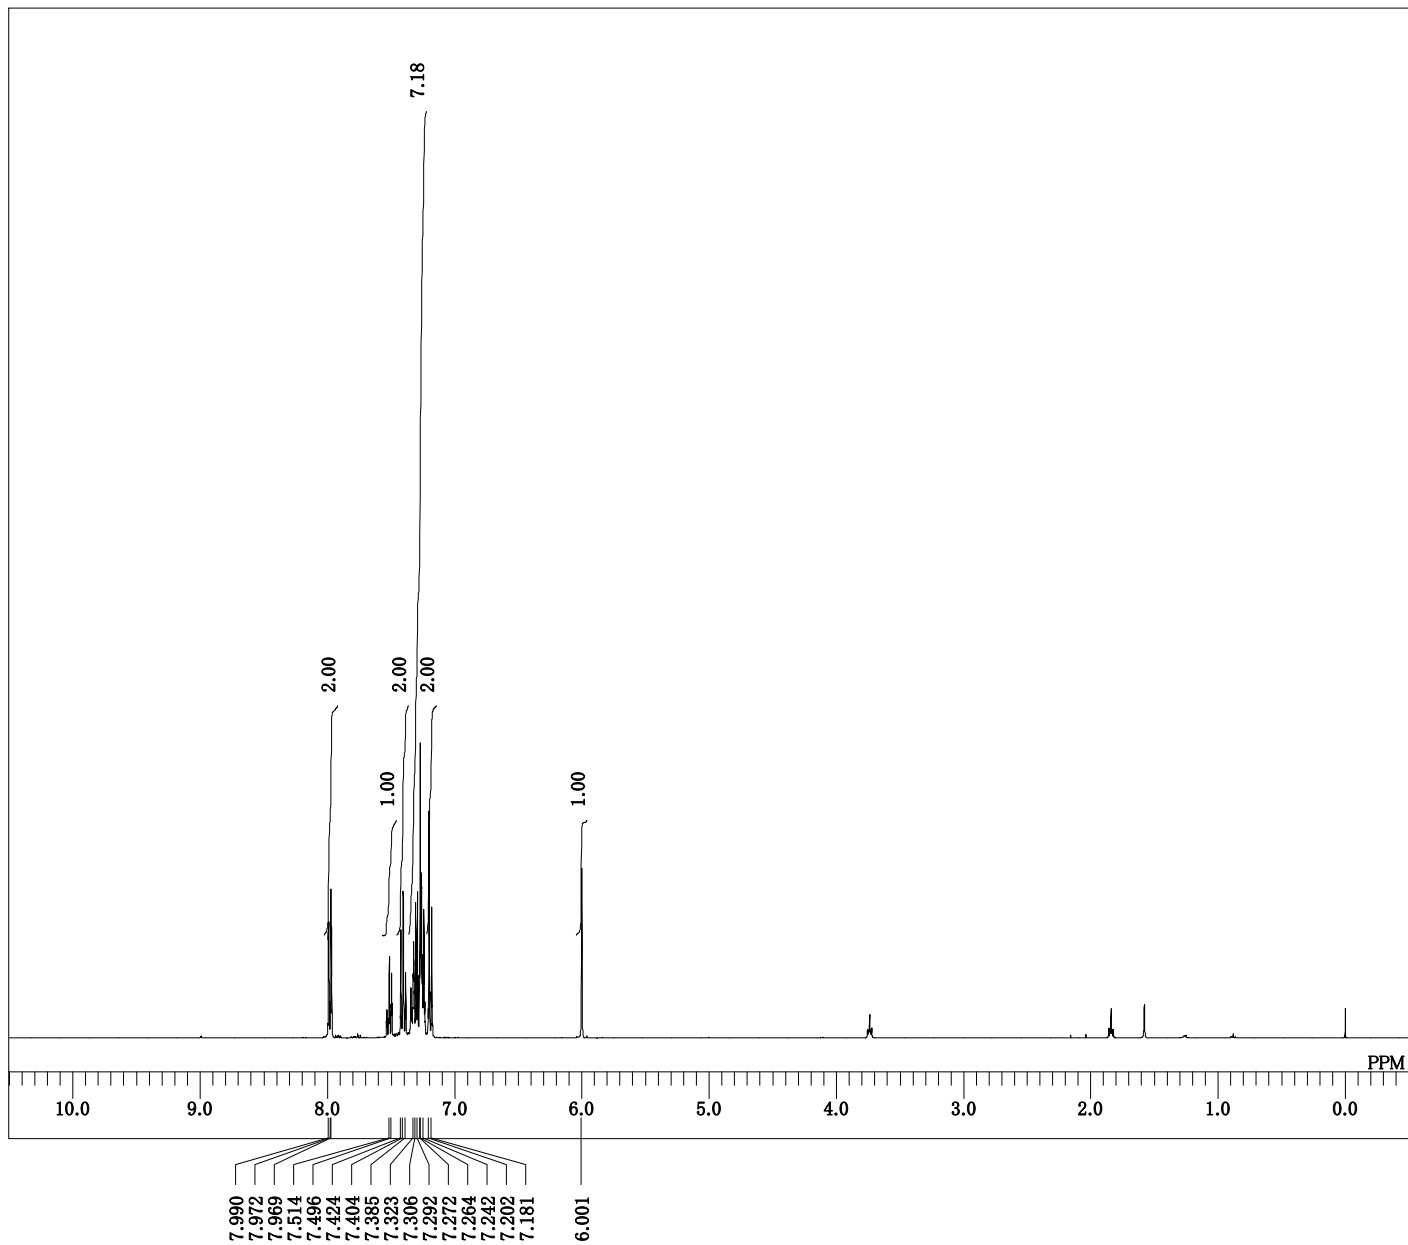

DFILE pro\_cyc\_H\_pCLProton.als  
 COMNT single\_pulse  
 DATIM 2020-06-25 09:51:57  
 OBNUC <sup>1</sup>H  
 EXMOD proton.jxp  
 OBFRQ 395.88 MHz  
 OBSET 6.28 KHz  
 OBFIN 0.87 Hz  
 POINT 13107  
 FREQU 5938.24 Hz  
 SCANS 8  
 ACQTM 2.2073 sec  
 PD 5.0000 sec  
 PW1 3.14 usec  
 IRNUC <sup>1</sup>H  
 CTEMP 20.6 c  
 SLVNT CDCL<sub>3</sub>  
 EXREF 0.00 ppm  
 BF 0.12 Hz  
 RGAIN 28

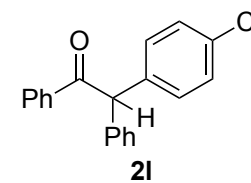

DFILE pro\_cyc\_HpClCarbon.als  
 COMNT single pulse decoupled gated NOE  
 DATIM 2020-06-25 09:53:10  
 13C  
 EXMOD carbon.jxp  
 OBFRQ 99.55 MHz  
 OBSET 5.13 KHz  
 OBFIN 0.98 Hz  
 POINT 26214  
 FREQU 25000.00 Hz  
 SCANS 957  
 ACQTM 1.0486 sec  
 PD 2.0000 sec  
 PW1 3.59 usec  
 IRNUC 1H  
 CTEMP 21.0 c  
 SLVNT CDCL3  
 EXREF 77.00 ppm  
 BF 0.12 Hz  
 RGAIN 50

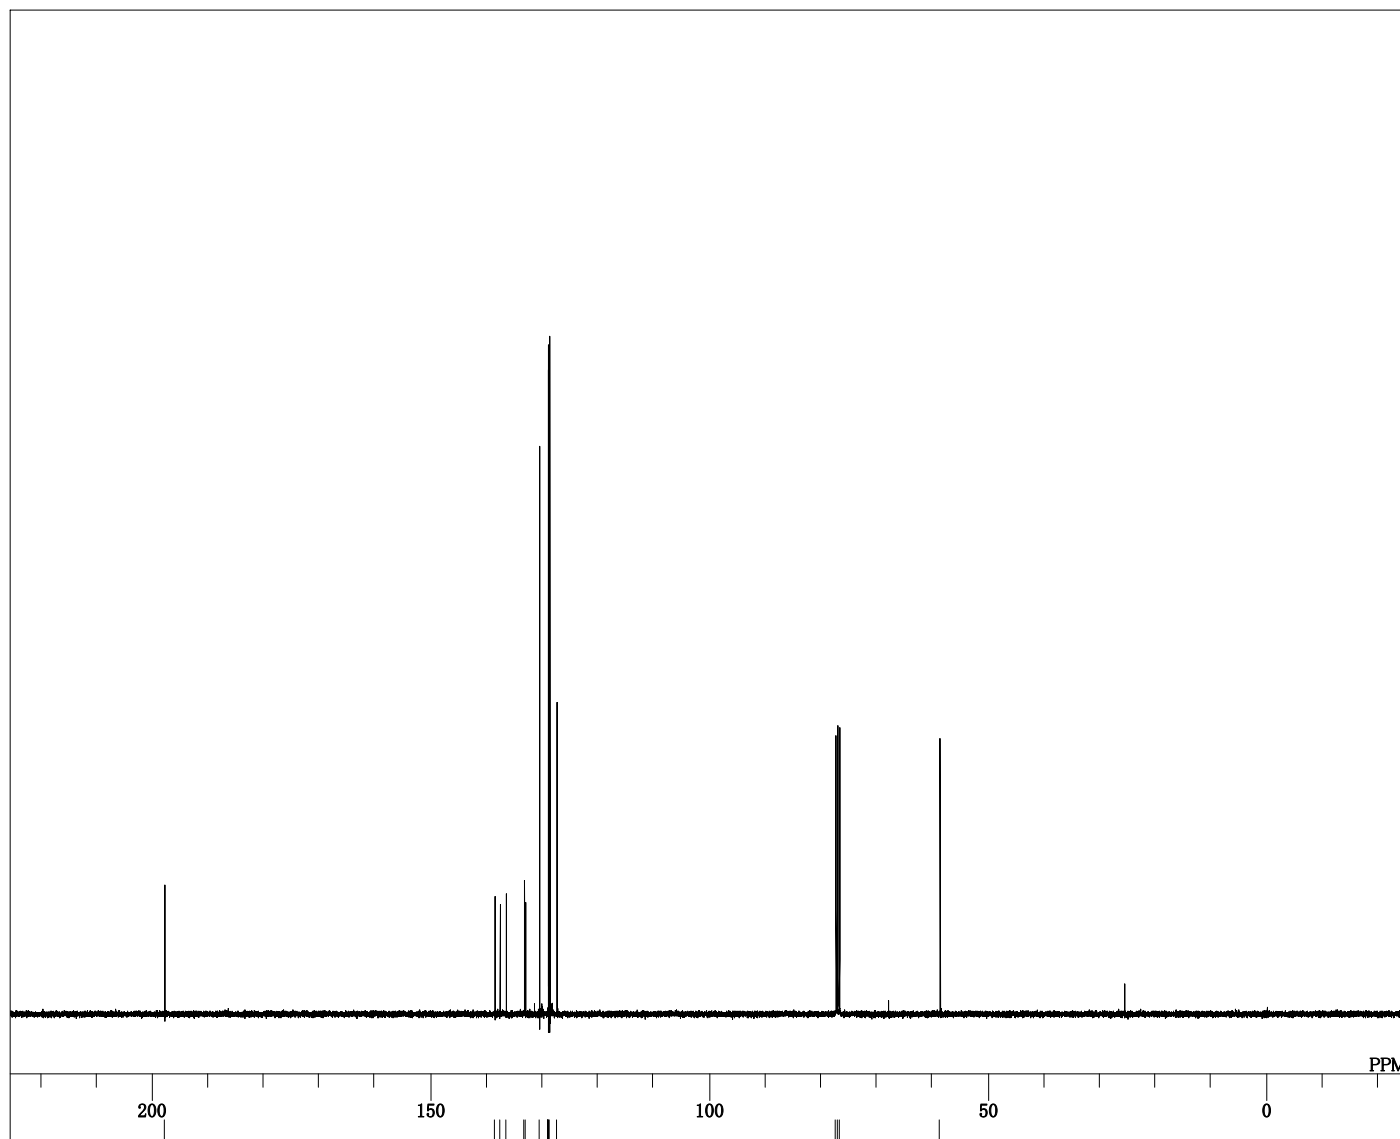

197.781

138.554  
 137.625  
 136.476  
 133.209  
 133.065  
 130.488  
 128.945  
 128.917  
 128.897  
 128.773  
 128.658  
 127.355

77.316  
 77.000  
 76.674

58.634

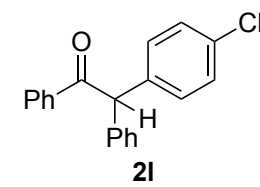

DFILE Ex655\_fr1\_20220411\_Proton-1-1.a  
 COMNT single\_pulse  
 DATIM 2022-04-11 14:21:34  
 OBNUC 1H  
 EXMOD proton.jxp  
 OBFRQ 395.88 MHz  
 OBSET 6.28 KHz  
 OBFIN 0.87 Hz  
 POINT 16384  
 FREQU 7422.80 Hz  
 SCANS 8  
 ACQTM 2.2073 sec  
 PD 5.0000 sec  
 PW1 3.25 usec  
 IRNUC 1H  
 CTEMP 21.0 c  
 SLVNT CDCL3  
 EXREF 0.00 ppm  
 BF 0.12 Hz  
 RGAIN 32

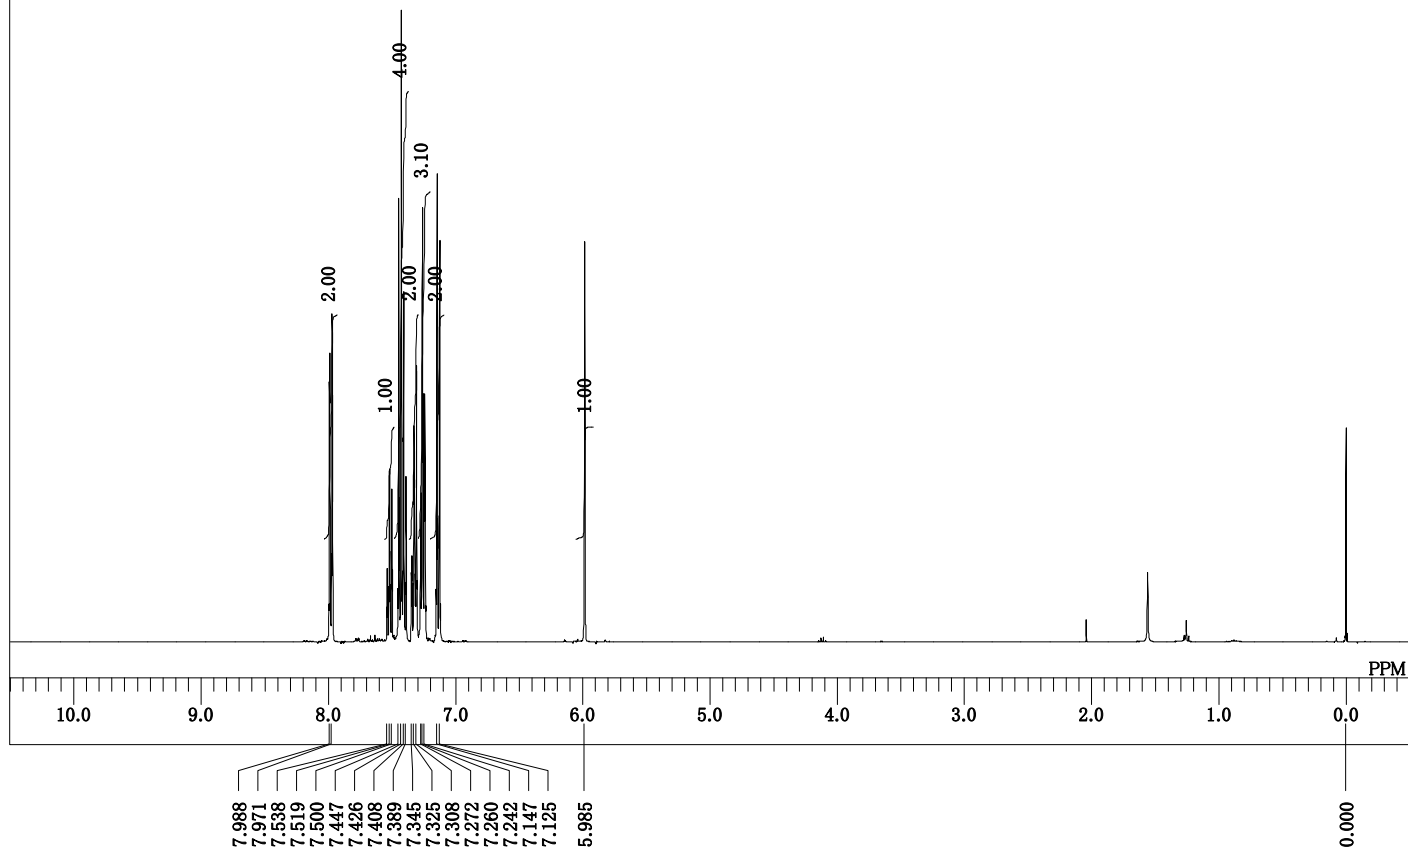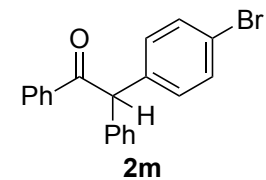

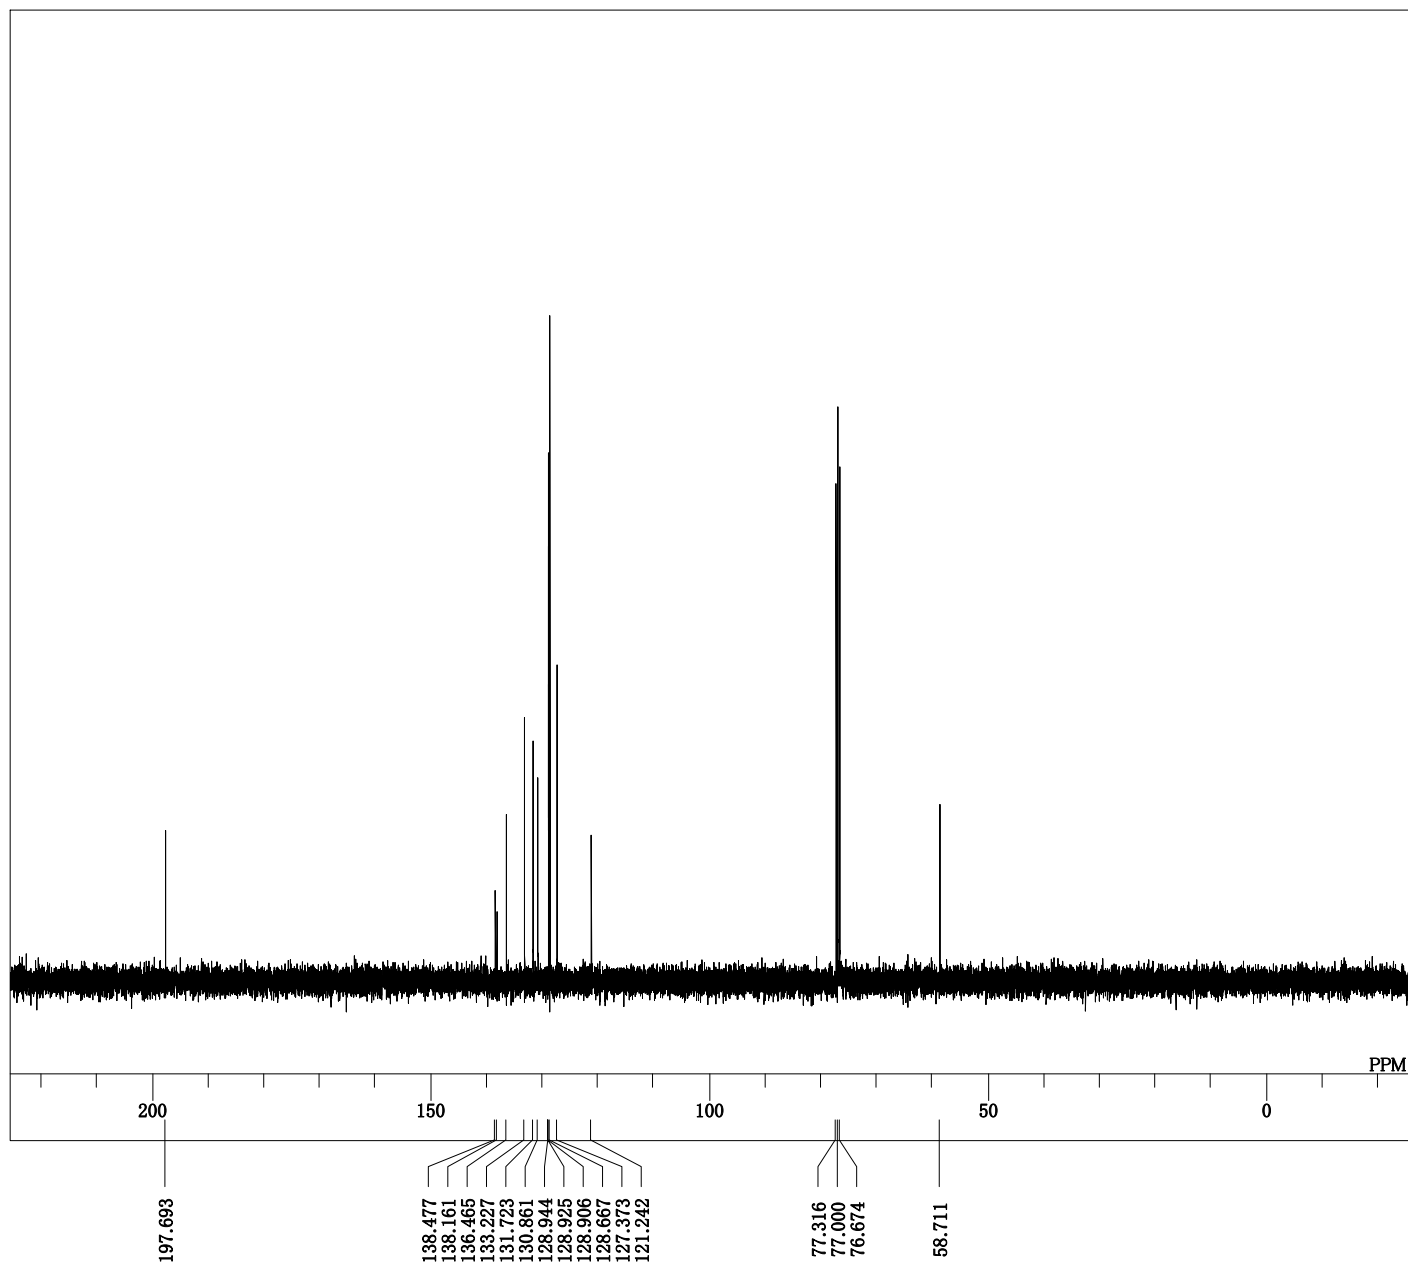

DFILE Ex655\_fr1\_20220411\_Carbon\_copy1  
 COMNT single pulse decoupled gated NOE  
 DATIM 2022-04-11 14:24:29  
 OBNUC 13C  
 EXMOD carbon.jxp  
 OBFRQ 99.55 MHz  
 OBSET 5.13 KHz  
 OBFIN 0.98 Hz  
 POINT 32767  
 FREQU 31250.00 Hz  
 SCANS 64  
 ACQTM 0.0000 sec  
 PD 2.0000 sec  
 PW1 3.67 usec  
 IRNUC 1H  
 CTEMP 20.9 c  
 SLVNT CDCL3  
 EXREF 77.00 ppm  
 BF 0.12 Hz  
 RGAIN 50

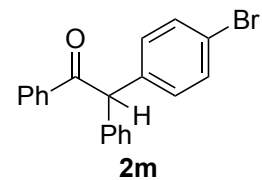

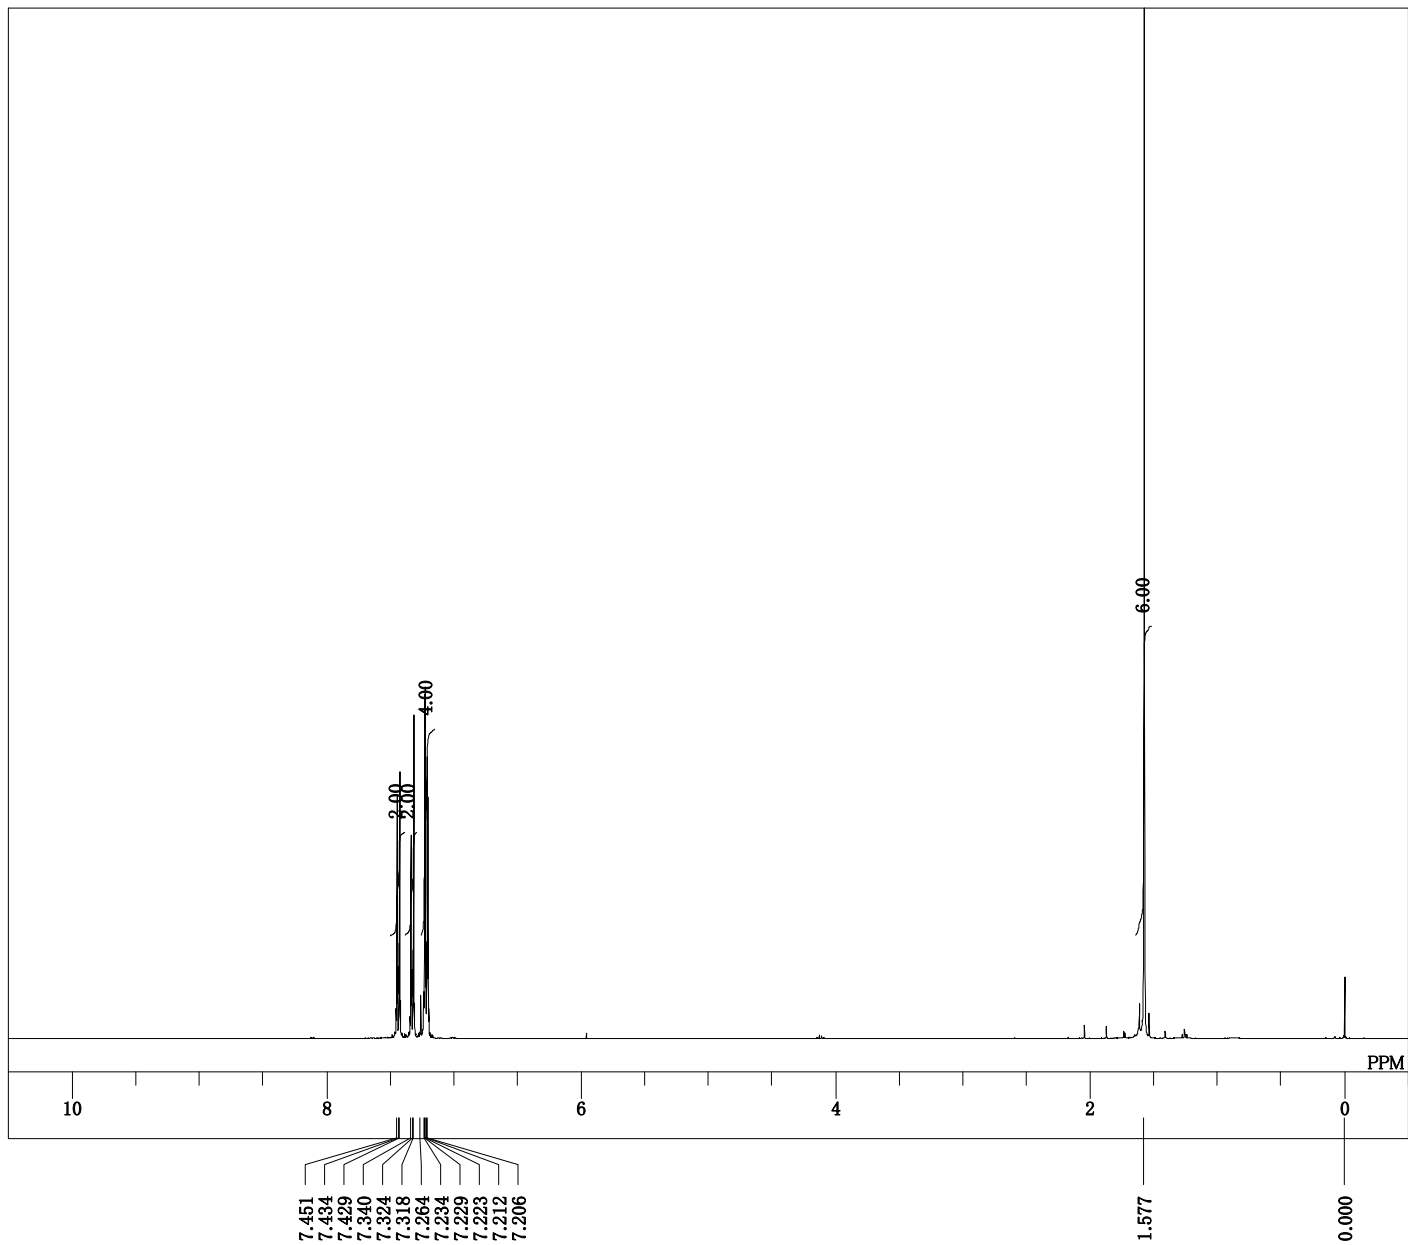

DFILE pro\_cyc\_pClpCl\_MeMe\_Proton.als  
 COMNT single\_pulse  
 DATIM 2020-11-25 08:55:43  
 OBNUC 1H  
 EXMOD proton.jxp  
 OBFRQ 395.88 MHz  
 OBSET 6.28 KHz  
 OBFIN 0.87 Hz  
 POINT 16384  
 FREQU 7422.80 Hz  
 SCANS 8  
 ACQTM 2.2073 sec  
 PD 5.0000 sec  
 PW1 3.14 usec  
 IRNUC 1H  
 CTEMP 19.0 c  
 SLVNT CDCL3  
 EXREF 0.00 ppm  
 BF 0.12 Hz  
 RGAIN 30

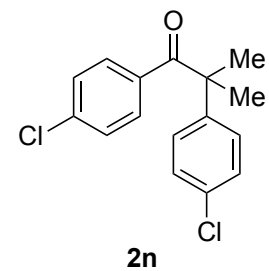

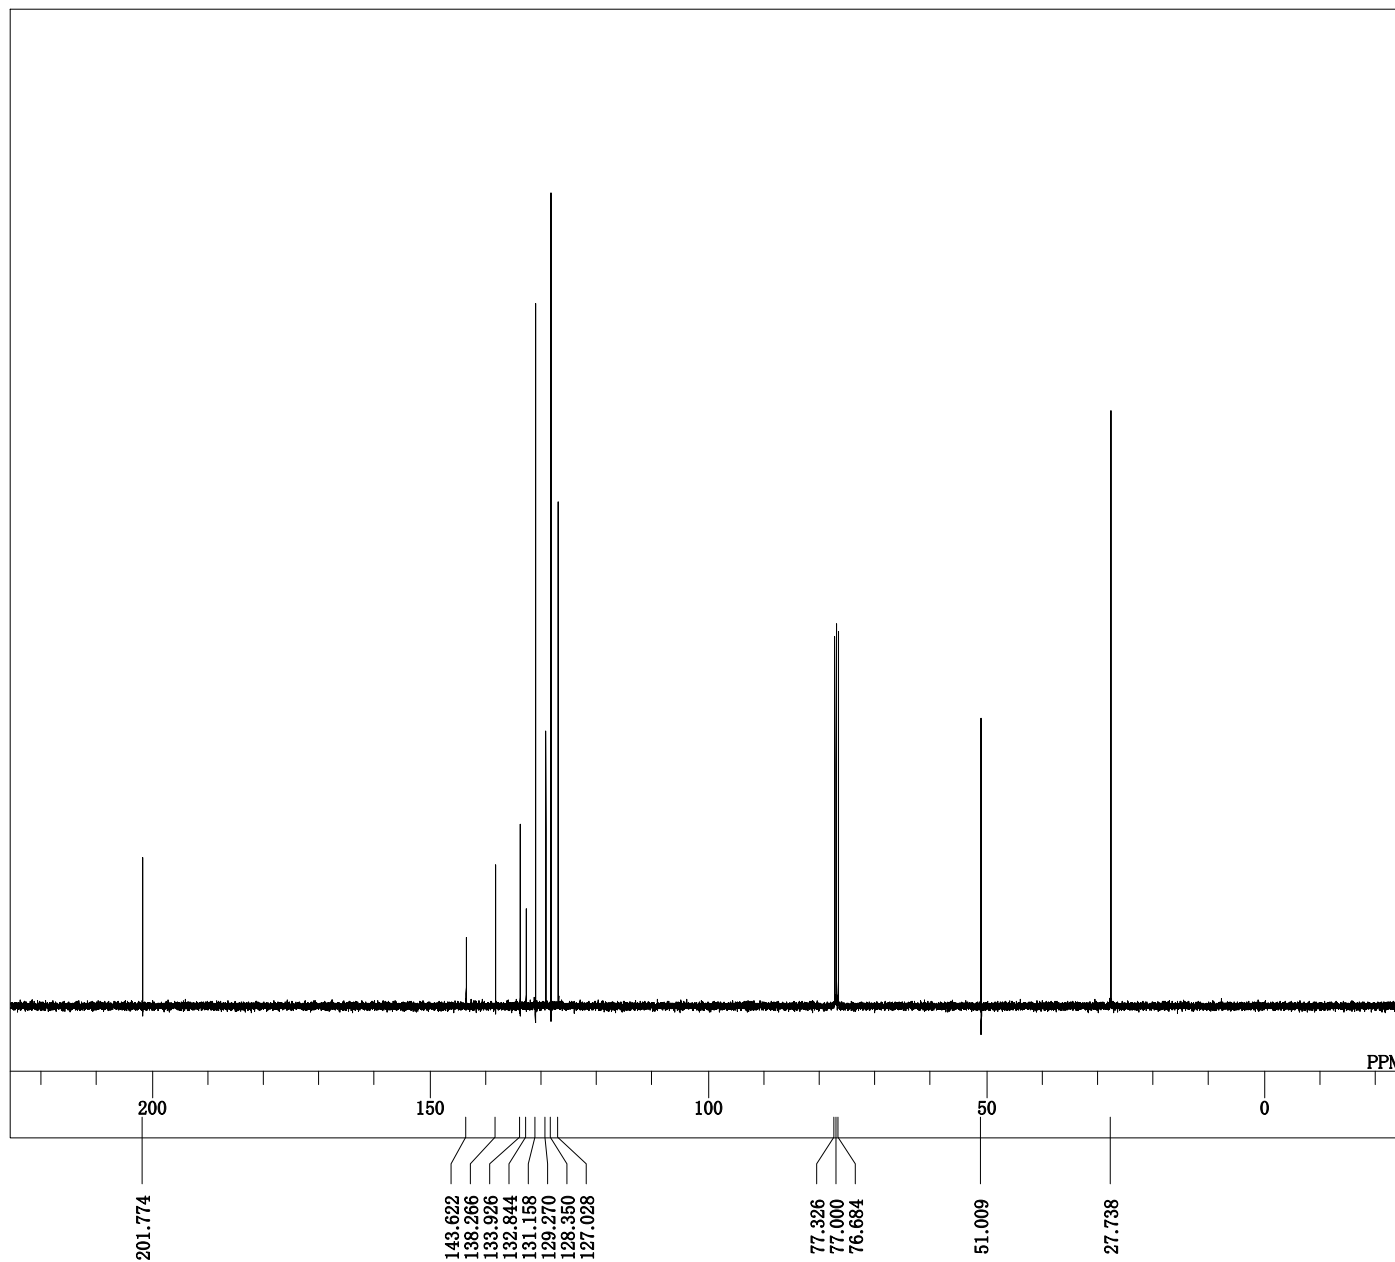

DFILE pro\_cyc\_pClpClMeMe\_Carbon.als  
 COMNT single pulse decoupled gated NOE  
 DATIM 2020-11-25 08:56:56  
 OBNUC 13C  
 EXMOD carbon.jxp  
 OBFREQ 99.55 MHz  
 OBSET 5.13 KHz  
 OBFIN 0.98 Hz  
 POINT 32767  
 FREQU 31250.00 Hz  
 SCANS 503  
 ACQTM 1.0486 sec  
 PD 2.0000 sec  
 PW1 3.59 usec  
 IRNUC 1H  
 CTEMP 18.9 c  
 SLVNT CDCL3  
 EXREF 77.00 ppm  
 BF 0.12 Hz  
 RGAIN 50

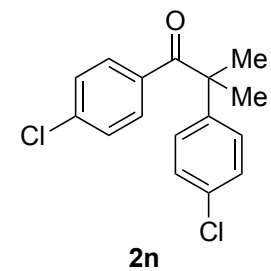



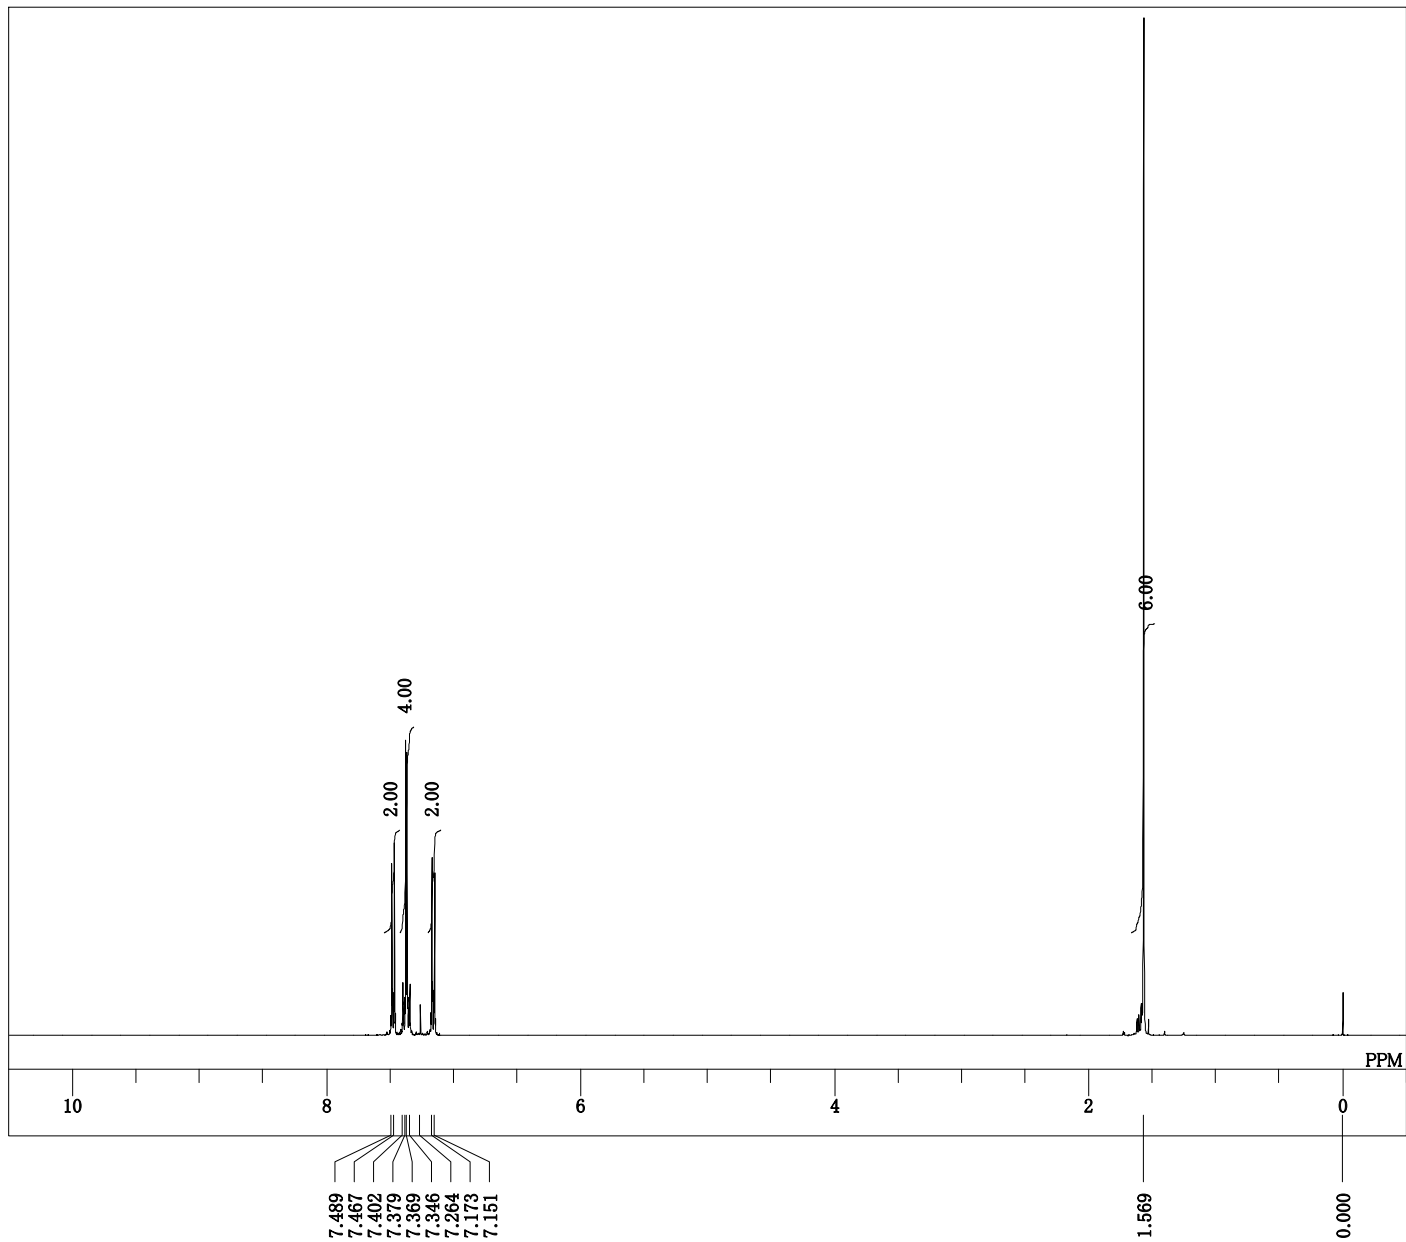

DFILE proton\_xjp  
 COMNT single pulse  
 DATIM 2020-12-05 18:47:25  
 OBNUC 1H  
 EXMOD proton\_xjp  
 OBFRQ 395.88 MHz  
 OBSET 6.28 KHz  
 OBFIN 0.87 Hz  
 POINT 13107  
 FREQU 5938.24 Hz  
 SCANS 8  
 ACQTM 2.2073 sec  
 PD 5.0000 sec  
 PW1 3.14 usec  
 IRNUC 1H  
 CTEMP 19.1 c  
 SLVNT CDCL3  
 EXREF 0.00 ppm  
 BF 0.12 Hz  
 RGAIN 28

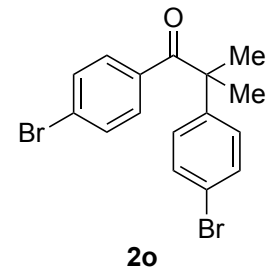

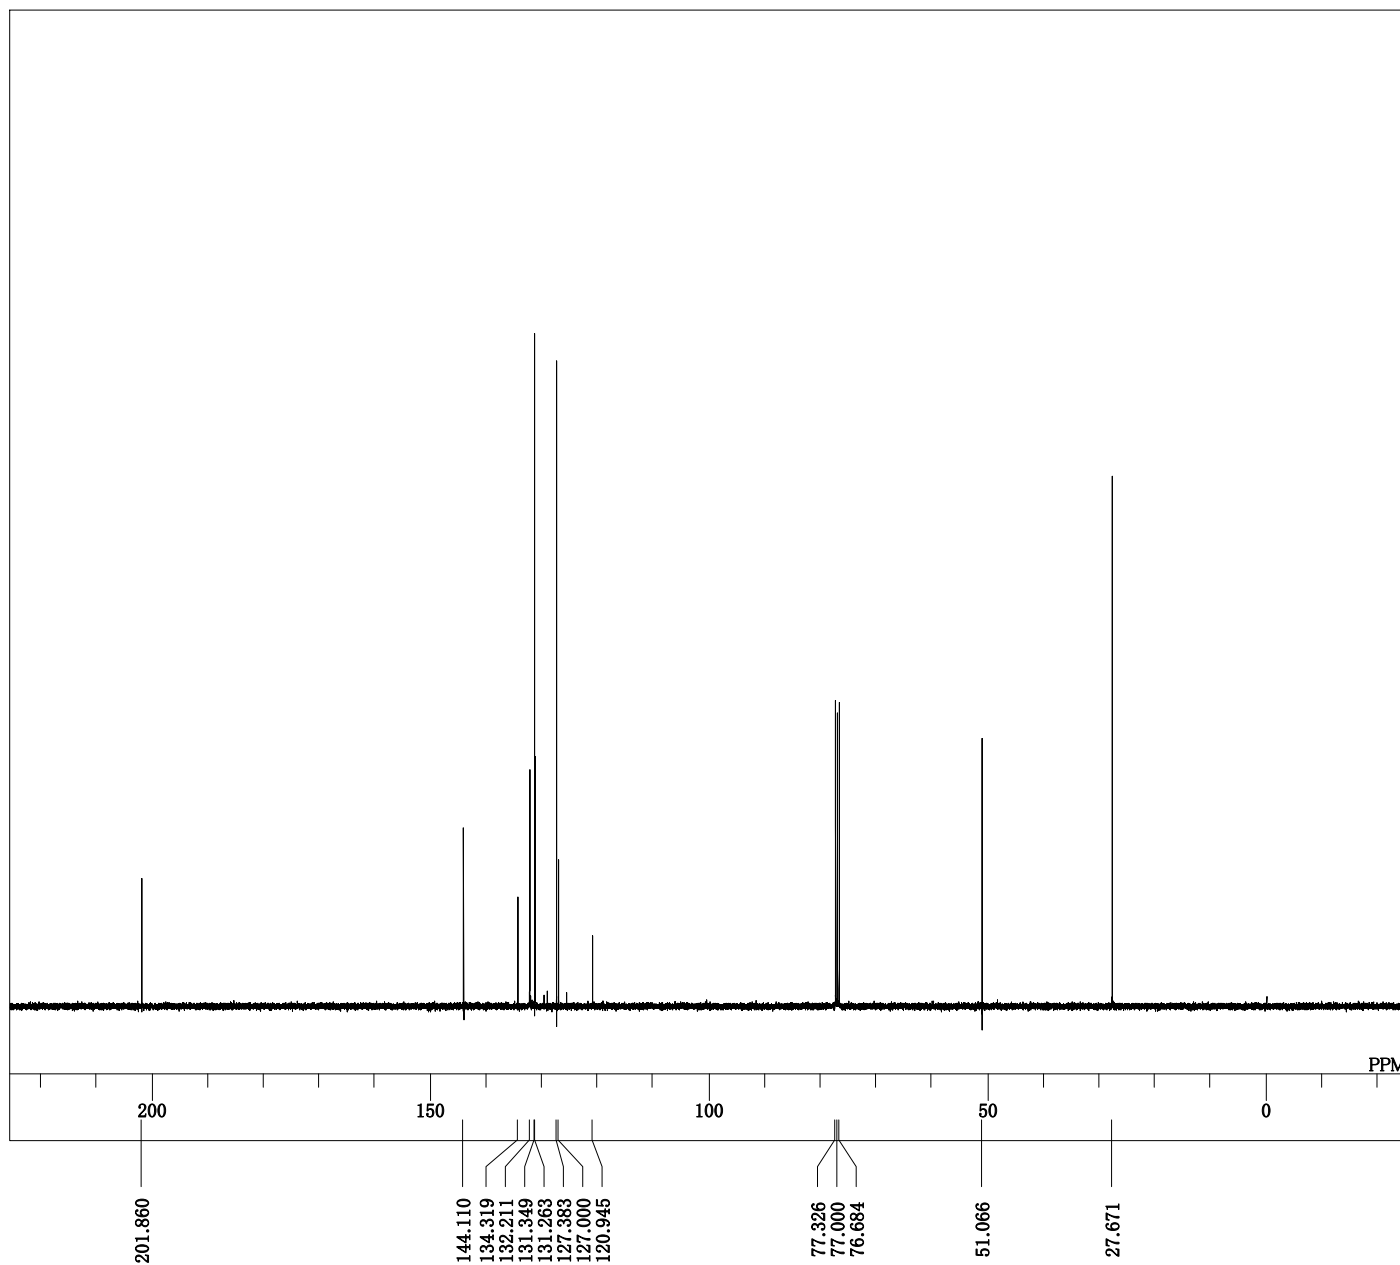

DFILE pro\_cyc.pBrpBr\_MeMe\_Carbon.als  
 COMNT single pulse decoupled gated NOE  
 DATIM 2020-12-05 18:48:37  
 OBNUC 13C  
 EXMOD carbon.jxp  
 OBFRQ 99.55 MHz  
 OBSET 5.13 KHz  
 OBFIN 0.98 Hz  
 POINT 32767  
 FREQU 31250.00 Hz  
 SCANS 515  
 ACQTM 1.0486 sec  
 PD 2.0000 sec  
 PW1 3.59 usec  
 IRNUC 1H  
 CTEMP 18.9 c  
 SLVNT CDCL3  
 EXREF 77.00 ppm  
 BF 0.12 Hz  
 RGAIN 50

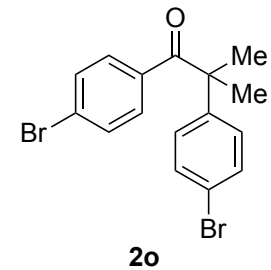

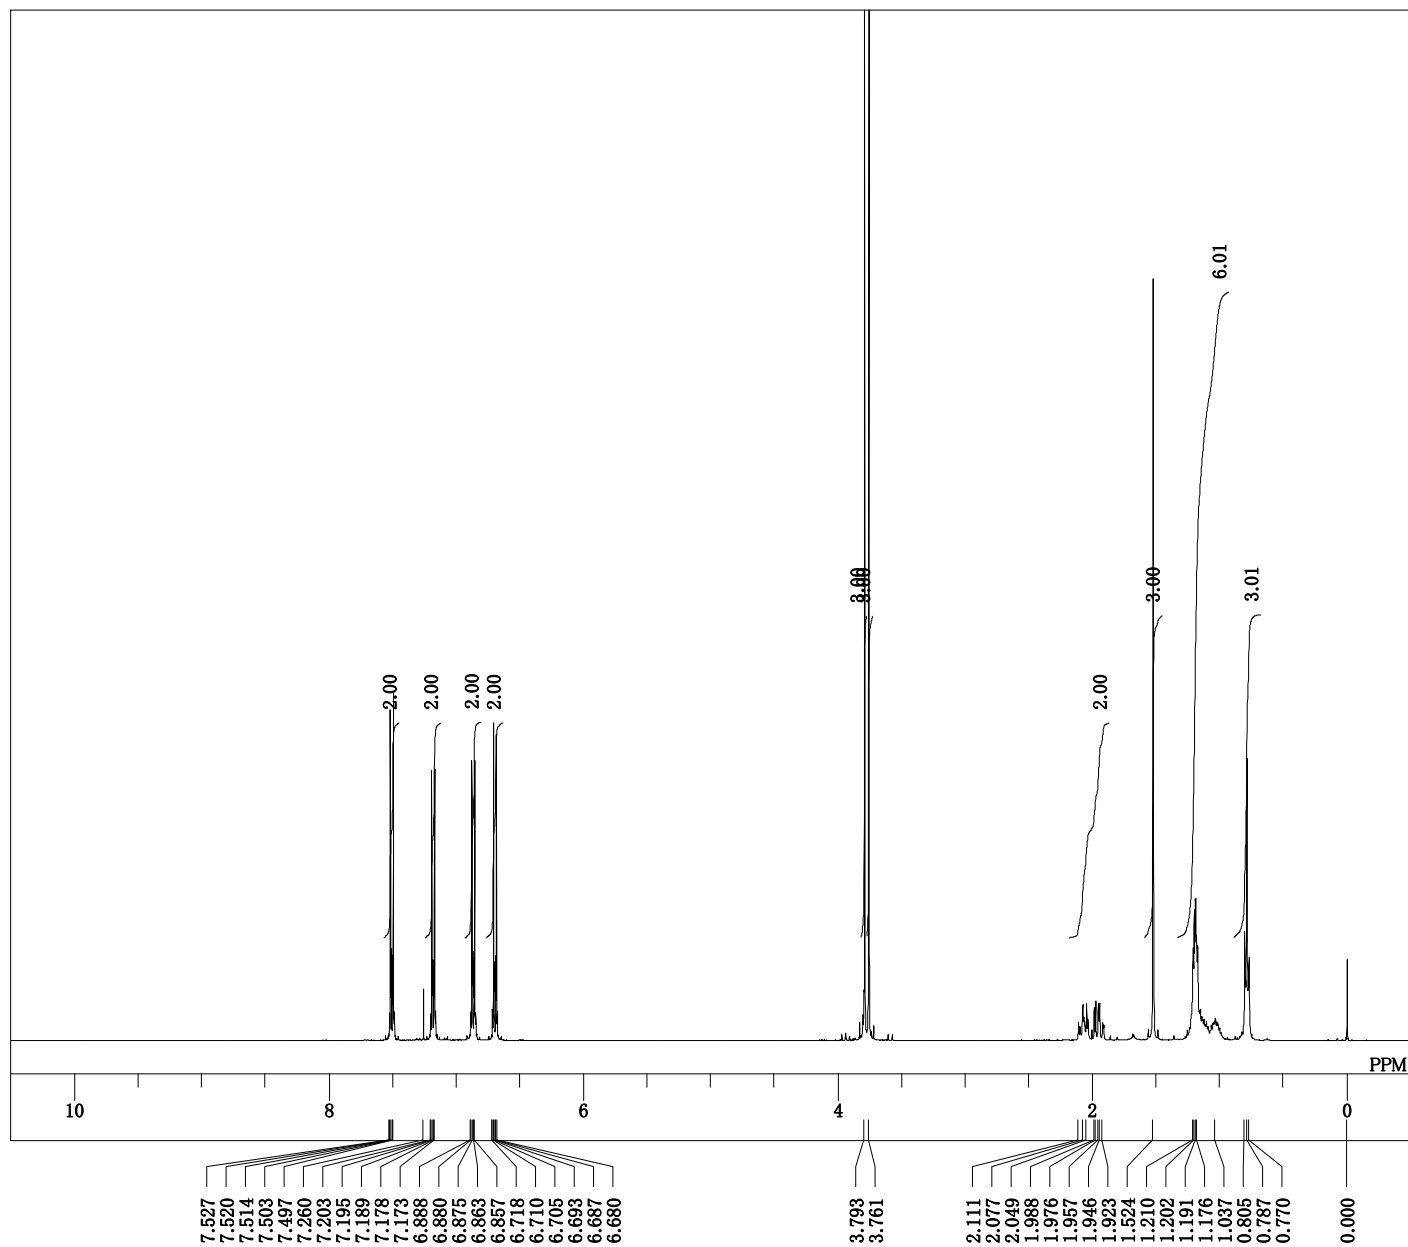

DFILE pro\_cyc\_PMPPMP\_MenPentyl\_Proto  
 COMNT single\_pulse  
 DATIM 2020-10-13 09:42:50  
 OBNUC 1H  
 EXMOD proton.jxp  
 OBFRQ 395.88 MHz  
 OBSET 6.28 KHz  
 OBFIN 0.87 Hz  
 POINT 13107  
 FREQU 5938.24 Hz  
 SCANS 8  
 ACQTM 2.2073 sec  
 PD 5.0000 sec  
 PW1 3.14 usec  
 IRNUC 1H  
 CTEMP 20.9 c  
 SLVNT CDCL3  
 EXREF 0.00 ppm  
 BF 0.12 Hz  
 RGAIN 22

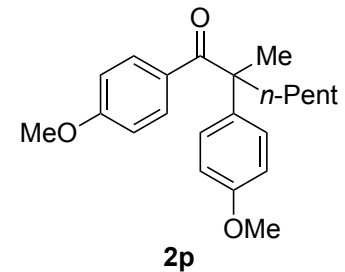

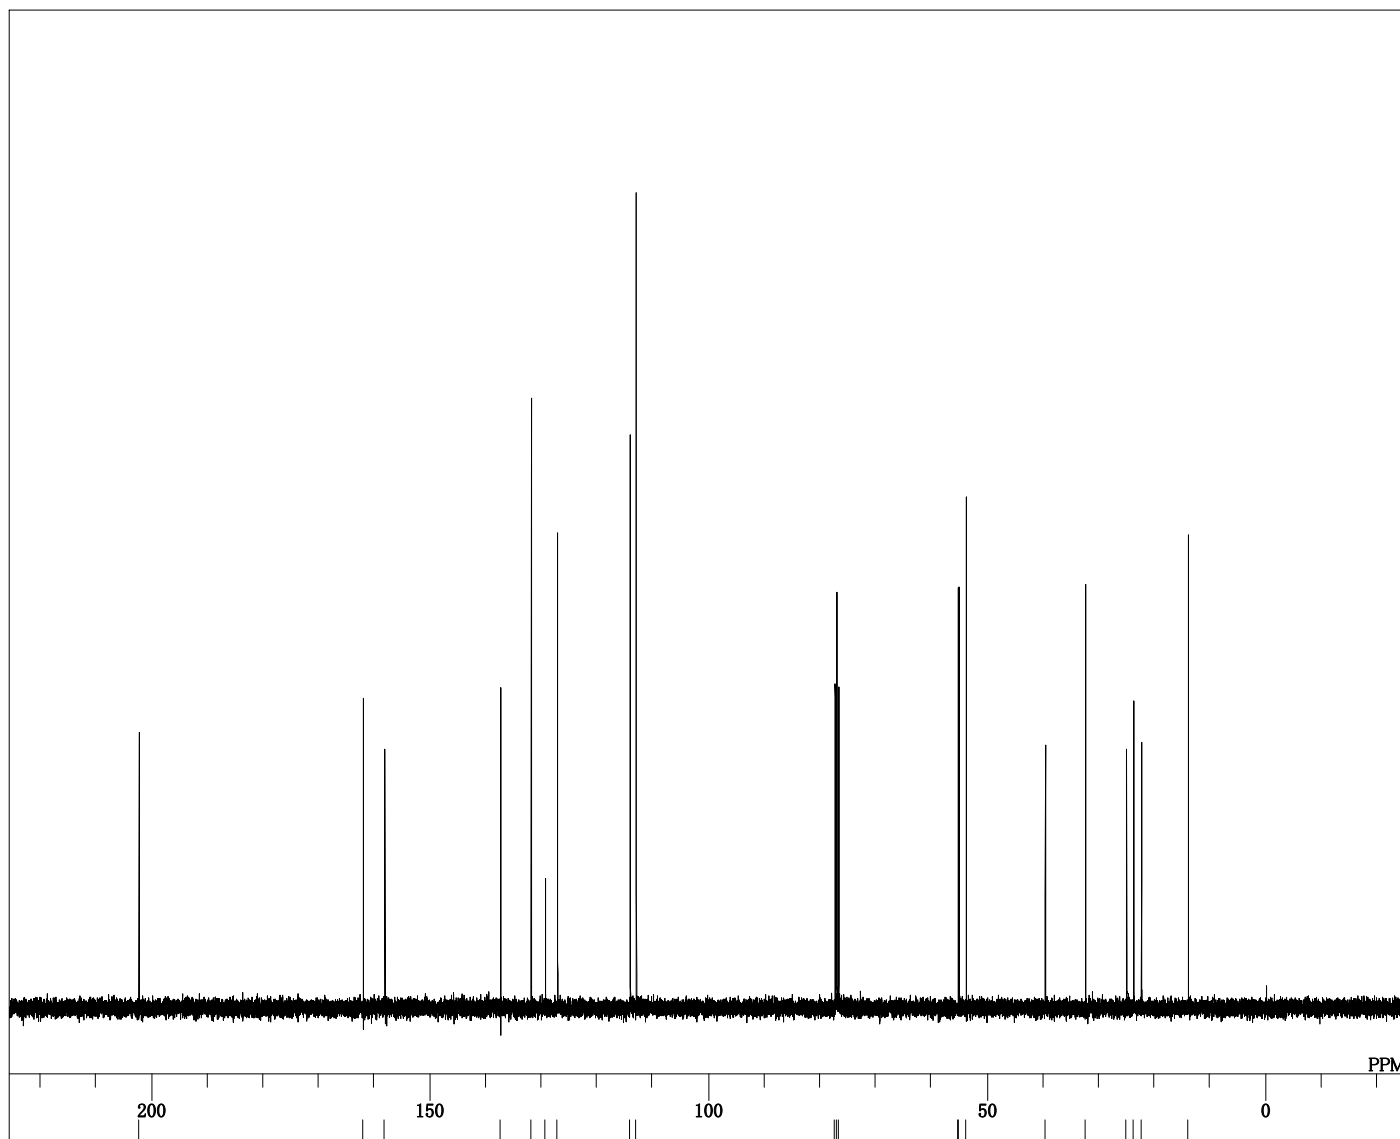

DFILE pro\_cyc.PMPPMP\_MenPentylCarbo  
 COMNT single pulse decoupled gated NOE  
 DATIM 2020-10-13 09:44:03  
 OBNUC 13C  
 EXMOD carbon.jxp  
 OBFRQ 99.55 MHz  
 OBSET 5.13 KHz  
 OBFIN 0.98 Hz  
 POINT 26214  
 FREQU 25000.00 Hz  
 SCANS 152  
 ACQTM 1.0486 sec  
 PD 2.0000 sec  
 PW1 3.59 usec  
 IRNUC 1H  
 CTEMP 20.7 c  
 SLVNT CDCL3  
 EXREF 77.00 ppm  
 BF 0.12 Hz  
 RGAIN 50

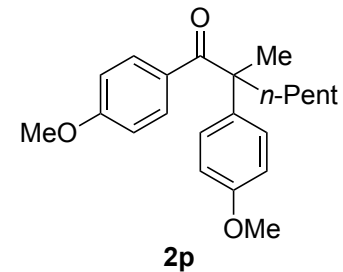

202.284

162.007  
158.118

137.309  
131.896  
129.328  
127.135

114.115  
113.003

77.326  
77.000  
76.674

55.214  
55.147  
53.748

39.607

32.393

25.016  
23.781  
22.363

13.941

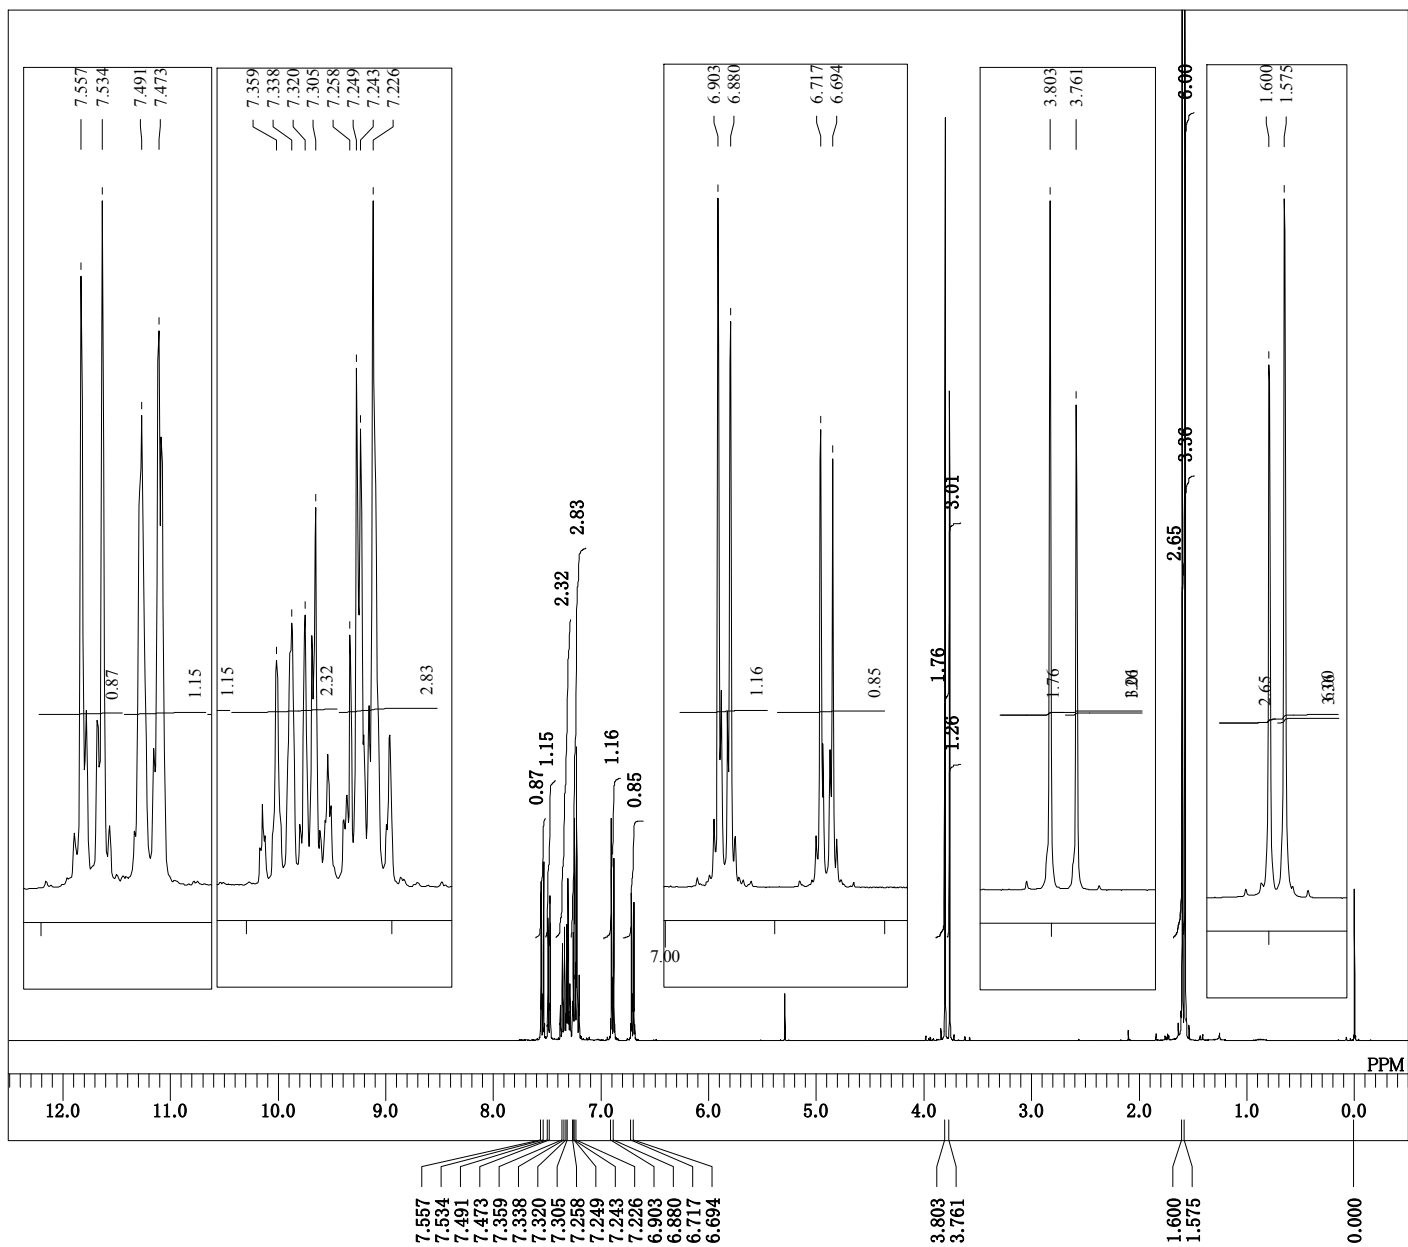

DFILE proton\_cyc\_PhPMP\_MeMe\_proton.als  
 COMNT single\_pulse  
 DATIM 2021-01-07 17:11:54  
 OBNUC 1H  
 EXMOD proton.jxp  
 OBFRQ 395.88 MHz  
 OBSET 6.28 KHz  
 OBFIN 0.87 Hz  
 POINT 16384  
 FREQU 7422.80 Hz  
 SCANS 8  
 ACQTM 2.2073 sec  
 PD 5.0000 sec  
 PW1 3.14 usec  
 IRNUC 1H  
 CTEMP 18.4 c  
 SLVNT CDCL3  
 EXREF 0.00 ppm  
 BF 0.12 Hz  
 RGAIN 30

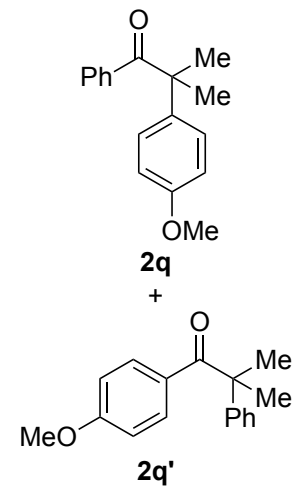

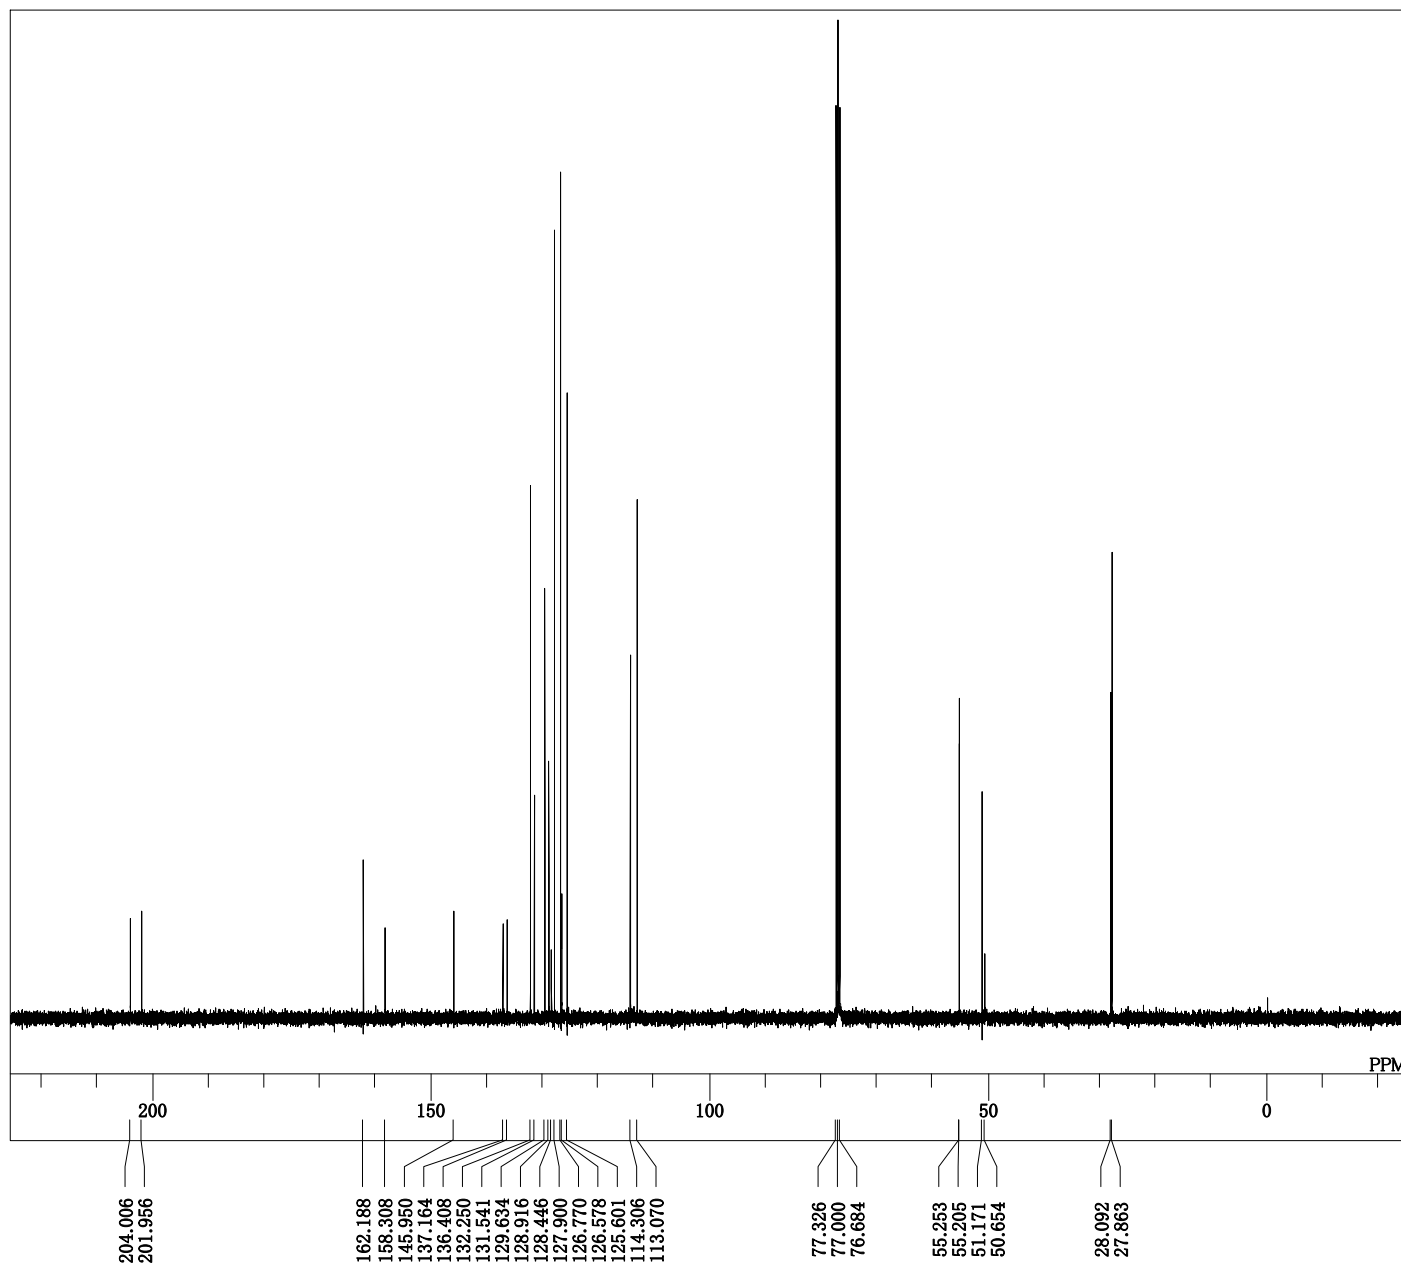

DFILE pro\_cyc.PhPMP.MeMe\_Carbon.als  
 COMNT single pulse decoupled gated NOE  
 DATIM 2021-01-07 17:13:06  
 OBNUC 13C  
 EXMOD carbon.jxp  
 OBFRQ 99.55 MHz  
 OBSET 5.13 KHz  
 OBFIN 0.98 Hz  
 POINT 32767  
 FREQU 31250.00 Hz  
 SCANS 1089  
 ACQTM 1.0486 sec  
 PD 2.0000 sec  
 PW1 3.59 usec  
 IRNUC 1H  
 CTEMP 18.6 c  
 SLVNT CDCL3  
 EXREF 77.00 ppm  
 BF 0.12 Hz  
 RGAIN 50

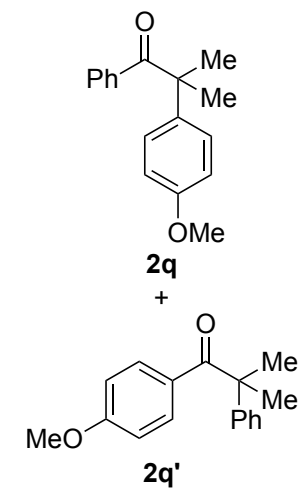

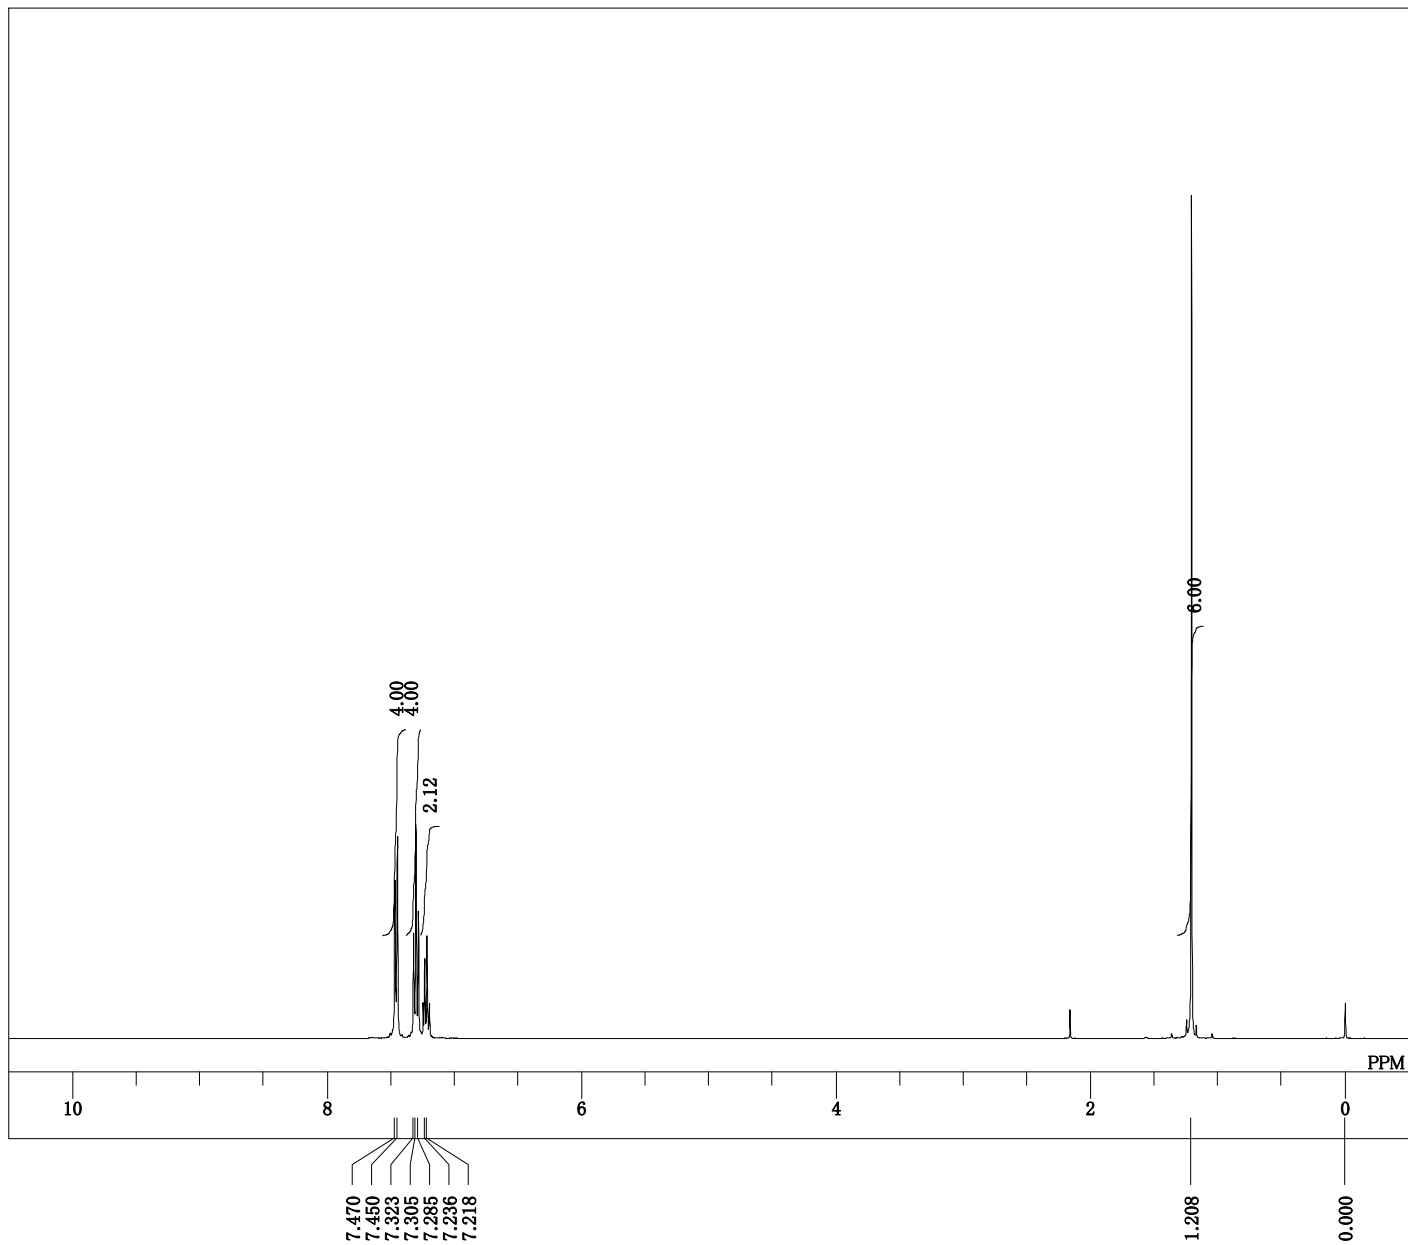

DFILE epoxy\_PhPh\_MeMe\_Proton.als  
 COMNT single\_pulse  
 DATIM 2020-12-21 18:57:55  
 OBNUC 1H  
 EXMOD proton.jxp  
 OBFRQ 395.88 MHz  
 OBSET 6.28 KHz  
 OBFIN 0.87 Hz  
 POINT 16384  
 FREQU 7422.80 Hz  
 SCANS 8  
 ACQTM 2.2073 sec  
 PD 5.0000 sec  
 PW1 3.14 usec  
 IRNUC 1H  
 CTEMP 18.5 c  
 SLVNT CDCL3  
 EXREF 0.00 ppm  
 BF 0.72 Hz  
 RGAIN 30

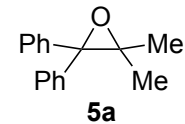

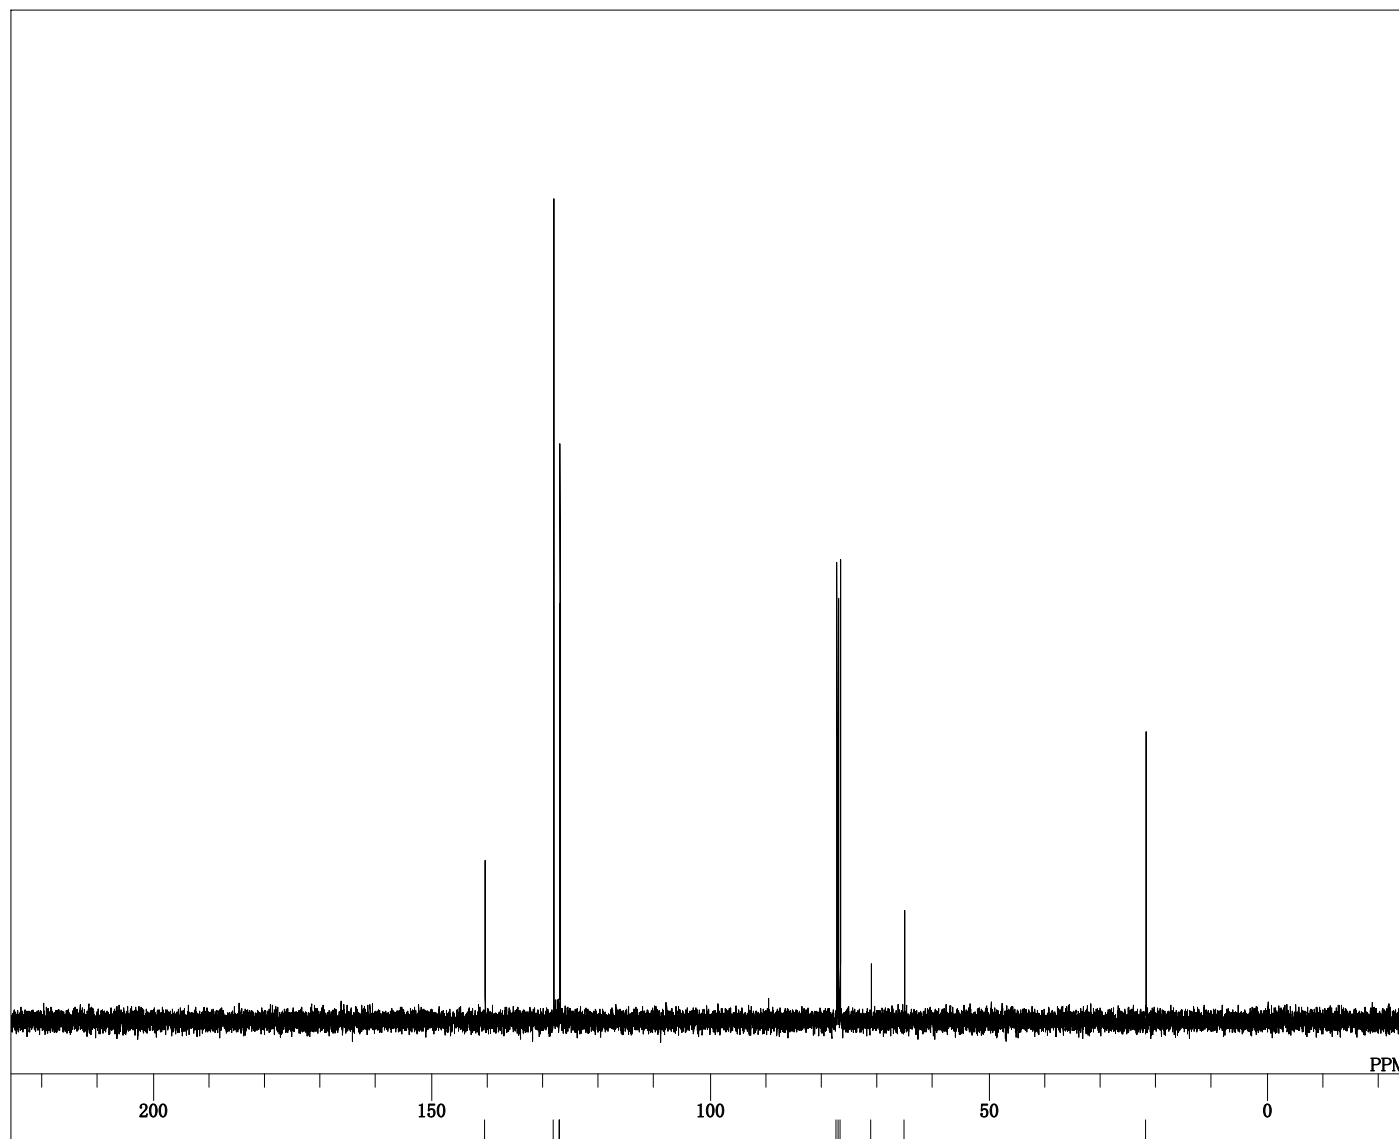

DFILE epoxy\_PhPh\_MeMe\_Carbon.als  
 COMNT single pulse decoupled gated NOE  
 DATIM 2020-12-21 18:59:07  
 OBNUC 13C  
 EXMOD carbon.jxp  
 OBFREQ 99.55 MHz  
 OBSET 5.13 KHz  
 OBFIN 0.98 Hz  
 POINT 32767  
 FREQU 31250.00 Hz  
 SCANS 32  
 ACQTM 1.0486 sec  
 PD 2.0000 sec  
 PW1 3.59 usec  
 IRNUC 1H  
 CTEMP 18.6 c  
 SLVNT CDCL3  
 EXREF 77.00 ppm  
 BF 0.72 Hz  
 RGAIN 50

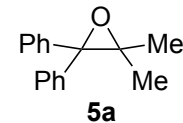

140.403  
 128.111  
 127.067  
 126.990

77.316  
 77.000  
 76.674  
 71.175  
 65.159

21.846
